# Supplementary material for: Virtual brain twins for stimulation in epilepsy
Source: Research Square preprint supplement (doi:10.21203/rs.3.rs-4908955/v1), 2024-09-03
Supplement: Supplementary file 1 [file Patient1_SEEG_stimulation.xlsx]

## Sheet: Sheet1
Left-O2	Left-O1	Left-Lingual-gyrus	Left-T2-posterior	Left-Occipital-pole	Left-Calcarine-sulcus	Left-STS-posterior	Left-Cuneus	Left-Lingual-sulcus	Left-Temporal-pole
1	0	0.461065	0	0.67108	0.536277	0.527914	0	0.712236	0.123411
1	0	0.684223	0	0.623297	0.481843	0.511813	0	0	0.0754651
1	0	0.591604	0	0.612382	0.511813	0.474767	0	0	0
1	0	0.684223	0	0.634594	0.519763	0.511813	0	0	0
1	0	0.612376	0	0.708247	0.491437	0.521753	0	0	0
1	0	0.684223	0	0.634594	0.481843	0.496479	0	0	0.0815977
1	0	0.67108	0	0.697925	0.489078	0.536277	0	0.394635	0.107367
1	0	0.684223	0	0.684223	0.481843	0.527914	0	0.383902	0.121069
1	0	0.712236	0	0.623297	0.504055	0.496479	0	0	0
1	0	0.581697	0	0.684223	0.467843	0.496479	0	0	0
1	0	0.684223	0	0.684223	0.489078	0.536277	0	0.389224	0.100729
1	0	0.708247	0	0.656876	0.529784	0.538013	0	0	0
1	0	0.612382	0	0.623297	0.504055	0.461065	0	0.339595	0
1	0	0.684223	0	0.634594	0.519763	0.504055	0	0	0
1	0	0.612376	0	0.708247	0.491437	0.521753	0	0	0
1	0	0.612376	0	0.708247	0.491437	0.513912	0	0	0
1	0	0.67108	0	0.697925	0.489078	0.536277	0	0.378667	0.100729
1	0	0.684223	0	0.646303	0.474767	0.496479	0	0	0.0878493
1	0	0.447922	0	0.67108	0.519763	0.519763	0	0.712236	0.118745
1	0	0.67108	0	0.634594	0.489078	0.496479	0	0	0.0836681
1	0	0.67108	0	0.646303	0.481843	0.496479	0	0	0.0942247
1	0	0.612376	0	0.708247	0.491437	0.513912	0	0	0
1	0	0.612376	0	0.708247	0.48427	0.521753	0	0	0
1	0	0.581697	0	0.67108	0.461065	0.489078	0	0	0
1	0	0.591604	0	0.612382	0.504055	0.461065	0	0	0
1	0	0.684223	0	0.634594	0.481843	0.504055	0	0	0.0836681
1	0	0.461065	0	0.67108	0.536277	0.527914	0	0.712236	0.123411
1	0	0.581697	0	0.67108	0.467843	0.504055	0	0	0
1	0	0.591604	0	0.612382	0.504055	0.461065	0	0	0
1	0	0.67108	0	0.684223	0.489078	0.536277	0	0.383902	0.147813
1	0	0.72243	0	0.645182	0.521753	0.521753	0	0	0
1	0	0.684223	0	0.684223	0.489078	0.536277	0	0.383902	0.105139
1	0	0.581697	0	0.67108	0.461065	0.496479	0	0	0
1	0	0.454426	0	0.658453	0.519763	0.527914	0	0.712236	0.130539
1	0	0.461065	0	0.67108	0.527914	0.519763	0	0.697925	0.118745
1	0	0.72243	0	0.645182	0.538013	0.513912	0	0	0
1	0	0.581697	0	0.612382	0.504055	0.467843	0	0	0
1	0	0.461065	0	0.67108	0.527914	0.527914	0	0.697925	0.114145
1	0	0.581697	0	0.67108	0.467843	0.511813	0	0	0
1	0	0.612382	0	0.623297	0.504055	0.474767	0	0.358539	0
1	0	0.712236	0	0.612382	0.511813	0.504055	0	0	0
1	0	0.612376	0	0.708247	0.491437	0.513912	0	0	0
1	0	0.447922	0	0.67108	0.519763	0.511813	0	0.712236	0.123411
1	0	0.658453	0	0.646303	0.474767	0.511813	0	0	0.0795405
1	0	0.612382	0	0.623297	0.504055	0.467843	0	0.344228	0
1	0	0.601825	0	0.612382	0.519763	0.467843	0	0	0
1	0	0.581697	0	0.684223	0.461065	0.504055	0	0	0
1	0	0.67108	0	0.684223	0.481843	0.536277	0	0.378667	0.142782
1	0	0.67108	0	0.684223	0.489078	0.536277	0	0.389224	0.152923
1	0	0.623297	0	0.623297	0.504055	0.467843	0	0	0
1	0	0.612376	0	0.708247	0.491437	0.521753	0	0	0
1	0	0.591604	0	0.612382	0.504055	0.461065	0	0.330526	0
1	0	0.581697	0	0.612382	0.511813	0.474767	0	0	0
1	0	0.454426	0	0.658453	0.519763	0.519763	0	0.712236	0.128145
1	0	0.581697	0	0.67108	0.461065	0.496479	0	0	0
1	0	0.612382	0	0.623297	0.519763	0.481843	0	0	0
1	0	0.72243	0	0.645182	0.521753	0.529784	0	0	0
1	0	0.581697	0	0.67108	0.461065	0.496479	0	0	0
1	0	0.712236	0	0.634594	0.504055	0.511813	0	0	0
1	0	0.67108	0	0.634594	0.481843	0.496479	0	0	0.0899605
1	0	0.612376	0	0.708247	0.491437	0.521753	0	0	0
1	0	0.67108	0	0.634594	0.489078	0.489078	0	0	0.0920855
1	0	0.461065	0	0.67108	0.527914	0.519763	0	0.697925	0.118745
1	0	0.581697	0	0.612382	0.504055	0.467843	0	0	0
1	0	0.684223	0	0.684223	0.489078	0.519763	0	0.400138	0.118745
1	0	0.684223	0	0.684223	0.489078	0.527914	0	0.394635	0.107367
1	0	0.684223	0	0.634594	0.519763	0.511813	0	0	0
1	0	0.697925	0	0.623297	0.519763	0.504055	0	0	0
1	0	0.581697	0	0.67108	0.461065	0.496479	0	0	0
1	0	0.684223	0	0.684223	0.481843	0.519763	0	0.383902	0.121069
1	0	0.67108	0	0.684223	0.489078	0.544863	0	0.383902	0.102927
1	0	0.67108	0	0.646303	0.474767	0.504055	0	0	0.0878493
1	0	0.612376	0	0.708247	0.48427	0.521753	0	0	0
1	0	0.454426	0	0.67108	0.519763	0.511813	0	0.712236	0.123411
1	0	0.697925	0	0.623297	0.511813	0.496479	0	0	0
1	0	0.684223	0	0.697925	0.489078	0.527914	0	0.389224	0.11187
1	0	0.461065	0	0.67108	0.519763	0.519763	0	0.712236	0.125769
1	0	0.67108	0	0.646303	0.481843	0.504055	0	0	0.0857519
1	0	0.684223	0	0.684223	0.489078	0.536277	0	0.405738	0.135381
1	0	0.67108	0	0.634594	0.481843	0.496479	0	0	0.0878493
1	0	0.612376	0	0.708247	0.491437	0.521753	0	0	0
1	0	0.612382	0	0.612382	0.504055	0.474767	0	0.339595	0
1	0	0.684223	0	0.634594	0.527914	0.504055	0	0	0
1	0	0.67108	0	0.684223	0.481843	0.544863	0	0.383902	0.152923
1	0	0.67108	0	0.684223	0.489078	0.544863	0	0.373516	0.145287
1	0	0.454426	0	0.67108	0.527914	0.527914	0	0.712236	0.121069
1	0	0.697925	0	0.634594	0.519763	0.527914	0	0	0
1	0	0.591604	0	0.612382	0.511813	0.467843	0	0	0
1	0	0.581697	0	0.612382	0.504055	0.467843	0	0	0
1	0	0.581697	0	0.684223	0.467843	0.489078	0	0	0
1	0	0.684223	0	0.646303	0.474767	0.496479	0	0	0.0774963
1	0	0.612376	0	0.708247	0.491437	0.521753	0	0	0
1	0	0.447922	0	0.67108	0.519763	0.519763	0	0.712236	0.121069
1	0	0.454426	0	0.658453	0.519763	0.519763	0	0.712236	0.121069
1	0	0.623297	0	0.612382	0.504055	0.467843	0	0.339595	0
1	0	0.684223	0	0.684223	0.489078	0.519763	0	0.400138	0.114145
1	0	0.697925	0	0.623297	0.504055	0.511813	0	0	0
1	0	0.612382	0	0.612382	0.504055	0.481843	0	0.335028	0
1	0	0.581697	0	0.684223	0.467843	0.504055	0	0	0
1	0	0.454426	0	0.67108	0.519763	0.511813	0	0.712236	0.121069
1	0	0.581697	0	0.684223	0.467843	0.496479	0	0	0
1	0	0.697925	0	0.612382	0.511813	0.519763	0	0	0
1	0	0.684223	0	0.634594	0.474767	0.496479	0	0	0.0857519
1	0	0.697925	0	0.623297	0.519763	0.511813	0	0	0
1	0	0.612376	0	0.708247	0.491437	0.513912	0	0	0
1	0	0.658453	0	0.646303	0.474767	0.511813	0	0	0.0836681
1	0	0.612382	0	0.623297	0.504055	0.474767	0	0.353697	0
1	0	0.581697	0	0.67108	0.461065	0.496479	0	0	0
1	0	0.67108	0	0.684223	0.489078	0.527914	0	0.389224	0.158116
1	0	0.612376	0	0.708247	0.491437	0.521753	0	0	0
1	0	0.697925	0	0.634594	0.474767	0.496479	0	0	0.0734466
1	0	0.658453	0	0.634594	0.481843	0.504055	0	0	0.0857519
1	0	0.461065	0	0.67108	0.519763	0.511813	0	0.712236	0.128145
1	0	0.67108	0	0.634594	0.489078	0.504055	0	0	0.0795405
1	0	0.697925	0	0.612382	0.511813	0.511813	0	0	0
1	0	0.612376	0	0.708247	0.491437	0.521753	0	0	0
1	0	0.697925	0	0.634594	0.474767	0.496479	0	0	0.0734466
1	0	0.581697	0	0.684223	0.467843	0.489078	0	0	0
1	0	0.461065	0	0.67108	0.527914	0.519763	0	0.697925	0.116437
1	0	0.461065	0	0.67108	0.536277	0.519763	0	0.697925	0.116437
1	0	0.591604	0	0.612382	0.504055	0.467843	0	0	0
1	0	0.697925	0	0.623297	0.504055	0.511813	0	0	0
1	0	0.581697	0	0.67108	0.461065	0.496479	0	0	0
1	0	0.697925	0	0.612382	0.511813	0.504055	0	0	0
1	0	0.708247	0	0.656876	0.538013	0.513912	0	0	0
1	0	0.712236	0	0.634594	0.519763	0.511813	0	0	0
1	0	0.697925	0	0.612382	0.511813	0.519763	0	0	0
1	0	0.612376	0	0.708247	0.491437	0.521753	0	0	0
1	0	0.67108	0	0.684223	0.489078	0.527914	0	0.389224	0.135381
1	0	0.461065	0	0.67108	0.527914	0.519763	0	0.697925	0.118745
1	0	0.591604	0	0.612382	0.511813	0.474767	0	0	0
1	0	0.581697	0	0.67108	0.467843	0.511813	0	0	0
1	0	0.623297	0	0.623297	0.504055	0.474767	0	0	0
1	0	0.612376	0	0.708247	0.491437	0.521753	0	0	0
1	0	0.684223	0	0.697925	0.496479	0.527914	0	0.405738	0.123411
1	0	0.67108	0	0.684223	0.489078	0.536277	0	0.389224	0.128145
1	0	0.612376	0	0.708247	0.491437	0.513912	0	0	0
1	0	0.581697	0	0.67108	0.461065	0.504055	0	0	0
1	0	0.612376	0	0.708247	0.491437	0.513912	0	0	0
1	0	0.697925	0	0.634594	0.474767	0.496479	0	0	0.0714407
1	0	0.684223	0	0.684223	0.481843	0.527914	0	0.389224	0.109611
1	0	0.684223	0	0.623297	0.474767	0.511813	0	0	0.0754651
1	0	0.697925	0	0.623297	0.511813	0.504055	0	0	0
1	0	0.581697	0	0.612382	0.504055	0.467843	0	0	0
1	0	0.658453	0	0.634594	0.489078	0.496479	0	0	0.0878493
1	0	0.67108	0	0.634594	0.489078	0.489078	0	0	0.0942247
1	0	0.684223	0	0.623297	0.467843	0.504055	0	0	0.0734466
1	0	0.612376	0	0.708247	0.491437	0.513912	0	0	0
1	0	0.612376	0	0.708247	0.491437	0.513912	0	0	0
1	0	0.697925	0	0.634594	0.511813	0.511813	0	0	0
1	0	0.67108	0	0.646303	0.474767	0.504055	0	0	0.0878493
1	0	0.708247	0	0.656876	0.538013	0.513912	0	0	0
1	0	0.684223	0	0.646303	0.474767	0.496479	0	0	0.0878493
1	0	0.581697	0	0.684223	0.467843	0.496479	0	0	0
1	0	0.612376	0	0.708247	0.48427	0.521753	0	0	0
1	0	0.581697	0	0.612382	0.504055	0.474767	0	0	0
1	0	0.612382	0	0.623297	0.504055	0.474767	0	0	0
1	0	0.684223	0	0.634594	0.504055	0.519763	0	0	0
1	0	0.708247	0	0.633884	0.538013	0.529784	0	0	0
1	0	0.697925	0	0.612382	0.511813	0.511813	0	0	0
1	0	0.612376	0	0.708247	0.491437	0.521753	0	0	0
1	0	0.601825	0	0.623297	0.519763	0.467843	0	0	0
1	0	0.581697	0	0.67108	0.461065	0.496479	0	0	0
1	0	0.67108	0	0.684223	0.496479	0.544863	0	0.378667	0.147813
1	0	0.684223	0	0.623297	0.481843	0.504055	0	0	0.0815977
1	0	0.612376	0	0.708247	0.491437	0.521753	0	0	0
1	0	0.67108	0	0.646303	0.474767	0.504055	0	0	0.0878493
1	0	0.591604	0	0.612382	0.504055	0.467843	0	0	0
1	0	0.697925	0	0.646303	0.511813	0.519763	0	0	0
1	0	0.454426	0	0.658453	0.519763	0.519763	0	0.712236	0.121069
1	0	0.697925	0	0.623297	0.527914	0.519763	0	0	0
1	0	0.581697	0	0.67108	0.467843	0.511813	0	0	0
1	0	0.461065	0	0.67108	0.536277	0.527914	0	0.712236	0.121069
1	0	0.684223	0	0.646303	0.474767	0.496479	0	0	0.0836681
1	0	0.697925	0	0.623297	0.467843	0.496479	0	0	0.0654969
1	0	0.67108	0	0.634594	0.481843	0.496479	0	0	0.0857519
1	0	0.591604	0	0.612382	0.511813	0.467843	0	0	0
1	0	0.591604	0	0.623297	0.511813	0.467843	0	0	0
1	0	0.581697	0	0.612382	0.511813	0.474767	0	0	0
1	0	0.67108	0	0.684223	0.481843	0.536277	0	0.394635	0.150358
1	0	0.684223	0	0.697925	0.496479	0.527914	0	0.394635	0.116437
1	0	0.612376	0	0.708247	0.491437	0.521753	0	0	0
1	0	0.612376	0	0.708247	0.491437	0.521753	0	0	0
1	0	0.581697	0	0.612382	0.504055	0.467843	0	0	0
1	0	0.581697	0	0.67108	0.461065	0.496479	0	0	0
1	0	0.601825	0	0.623297	0.511813	0.467843	0	0	0
1	0	0.612382	0	0.623297	0.504055	0.467843	0	0.353697	0
1	0	0.591604	0	0.612382	0.519763	0.467843	0	0	0
1	0	0.447922	0	0.67108	0.527914	0.519763	0	0.712236	0.118745
1	0	0.591604	0	0.612382	0.504055	0.461065	0	0	0
1	0	0.612376	0	0.708247	0.491437	0.513912	0	0	0
1	0	0.447922	0	0.67108	0.519763	0.519763	0	0.712236	0.118745
1	0	0.612382	0	0.623297	0.511813	0.481843	0	0.348928	0
1	0	0.697925	0	0.634594	0.519763	0.519763	0	0	0
1	0	0.591604	0	0.612382	0.504055	0.461065	0	0	0
1	0	0.612376	0	0.708247	0.491437	0.521753	0	0	0
1	0	0.708247	0	0.645182	0.521753	0.529784	0	0	0
1	0	0.581697	0	0.612382	0.504055	0.467843	0	0	0
1	0	0.658453	0	0.646303	0.474767	0.511813	0	0	0.0857519
1	0	0.684223	0	0.623297	0.467843	0.504055	0	0	0.0774963
1	0	0.581697	0	0.612382	0.504055	0.474767	0	0	0
1	0	0.612376	0	0.708247	0.491437	0.521753	0	0	0
1	0	0.684223	0	0.634594	0.511813	0.519763	0	0	0
1	0	0.684223	0	0.684223	0.481843	0.536277	0	0.389224	0.135381
1	0	0.697925	0	0.623297	0.504055	0.511813	0	0	0
1	0	0.612382	0	0.623297	0.504055	0.467843	0	0.348928	0
1	0	0.591604	0	0.612382	0.511813	0.467843	0	0	0
1	0	0.684223	0	0.697925	0.489078	0.527914	0	0.400138	0.114145
1	0	0.67108	0	0.684223	0.481843	0.536277	0	0.368446	0.147813
1	0	0.684223	0	0.697925	0.496479	0.527914	0	0.400138	0.125769
1	0	0.67108	0	0.684223	0.496479	0.536277	0	0.383902	0.147813
1	0	0.581697	0	0.67108	0.461065	0.504055	0	0	0
1	0	0.684223	0	0.634594	0.474767	0.496479	0	0	0.0795405
1	0	0.581697	0	0.612382	0.504055	0.467843	0	0	0
1	0	0.697925	0	0.612382	0.519763	0.511813	0	0	0
1	0	0.612376	0	0.708247	0.491437	0.513912	0	0	0
1	0	0.591604	0	0.612382	0.504055	0.461065	0	0.330526	0
1	0	0.684223	0	0.623297	0.527914	0.511813	0	0	0
1	0	0.697925	0	0.623297	0.519763	0.519763	0	0	0
1	0	0.612376	0	0.708247	0.491437	0.513912	0	0	0
1	0	0.454426	0	0.67108	0.519763	0.519763	0	0.712236	0.123411
1	0	0.612382	0	0.623297	0.504055	0.481843	0	0.348928	0
1	0	0.684223	0	0.634594	0.474767	0.504055	0	0	0.0899605
1	0	0.581697	0	0.684223	0.467843	0.496479	0	0	0
1	0	0.612376	0	0.708247	0.48427	0.521753	0	0	0
1	0	0.697925	0	0.623297	0.511813	0.511813	0	0	0
1	0	0.684223	0	0.634594	0.474767	0.496479	0	0	0.0815977
1	0	0.67108	0	0.646303	0.474767	0.504055	0	0	0.0920855
1	0	0.612376	0	0.708247	0.491437	0.521753	0	0	0
1	0	0.684223	0	0.612382	0.511813	0.519763	0	0	0
1	0	0.684223	0	0.684223	0.489078	0.527914	0	0.389224	0.109611
1	0	0.612376	0	0.708247	0.491437	0.513912	0	0	0
1	0	0.601825	0	0.612382	0.496479	0.474767	0	0	0
1	0	0.581697	0	0.67108	0.461065	0.496479	0	0	0
1	0	0.67108	0	0.684223	0.489078	0.536277	0	0.389224	0.155509
1	0	0.581697	0	0.67108	0.467843	0.496479	0	0	0
1	0	0.581697	0	0.67108	0.461065	0.504055	0	0	0
1	0	0.623297	0	0.623297	0.511813	0.467843	0	0	0
1	0	0.447922	0	0.67108	0.527914	0.519763	0	0.712236	0.123411
1	0	0.447922	0	0.67108	0.519763	0.519763	0	0.712236	0.118745
1	0	0.581697	0	0.684223	0.461065	0.504055	0	0	0
1	0	0.447922	0	0.67108	0.519763	0.519763	0	0.712236	0.118745
1	0	0.581697	0	0.684223	0.461065	0.504055	0	0	0
1	0	0.612376	0	0.708247	0.491437	0.513912	0	0	0
1	0	0.684223	0	0.684223	0.481843	0.544863	0	0.394635	0.150358
1	0	0.67108	0	0.684223	0.489078	0.527914	0	0.389224	0.11187
1	0	0.581697	0	0.67108	0.461065	0.489078	0	0	0
1	0	0.67108	0	0.684223	0.489078	0.536277	0	0.389224	0.152923
1	0	0.684223	0	0.697925	0.489078	0.527914	0	0.405738	0.121069
1	0	0.581697	0	0.684223	0.467843	0.489078	0	0	0
1	0	0.447922	0	0.67108	0.527914	0.527914	0	0.712236	0.123411
1	0	0.581697	0	0.684223	0.461065	0.496479	0	0	0
1	0	0.72243	0	0.645182	0.521753	0.529784	0	0	0
1	0	0.612376	0	0.708247	0.491437	0.513912	0	0	0
1	0	0.712236	0	0.623297	0.504055	0.511813	0	0	0
1	0	0.684223	0	0.612382	0.519763	0.519763	0	0	0
1	0	0.697925	0	0.634594	0.467843	0.496479	0	0	0.0795405
1	0	0.712236	0	0.623297	0.504055	0.504055	0	0	0
1	0	0.684223	0	0.684223	0.474767	0.544863	0	0.389224	0.130539
1	0	0.612376	0	0.708247	0.491437	0.521753	0	0	0
1	0	0.581697	0	0.684223	0.467843	0.496479	0	0	0
1	0	0.591604	0	0.612382	0.511813	0.474767	0	0	0
1	0	0.623297	0	0.623297	0.504055	0.489078	0	0	0
1	0	0.612376	0	0.708247	0.491437	0.521753	0	0	0
1	0	0.697925	0	0.623297	0.519763	0.496479	0	0	0
1	0	0.581697	0	0.684223	0.467843	0.496479	0	0	0
1	0	0.712236	0	0.634594	0.511813	0.511813	0	0	0
1	0	0.697925	0	0.634594	0.519763	0.504055	0	0	0
1	0	0.612376	0	0.708247	0.491437	0.521753	0	0	0
1	0	0.612376	0	0.708247	0.491437	0.513912	0	0	0
1	0	0.581697	0	0.684223	0.467843	0.496479	0	0	0
1	0	0.612376	0	0.708247	0.491437	0.521753	0	0	0
1	0	0.684223	0	0.684223	0.489078	0.536277	0	0.389224	0.150358
1	0	0.612382	0	0.623297	0.511813	0.474767	0	0	0
1	0	0.581697	0	0.67108	0.467843	0.511813	0	0	0
1	0	0.612376	0	0.708247	0.491437	0.521753	0	0	0
1	0	0.697925	0	0.634594	0.511813	0.504055	0	0	0
1	0	0.67108	0	0.634594	0.481843	0.496479	0	0	0.0836681
1	0	0.612376	0	0.708247	0.491437	0.513912	0	0	0
1	0	0.712236	0	0.623297	0.519763	0.511813	0	0	0
1	0	0.581697	0	0.684223	0.461065	0.504055	0	0	0
1	0	0.441547	0	0.67108	0.519763	0.511813	0	0.712236	0.118745
1	0	0.684223	0	0.697925	0.489078	0.527914	0	0.394635	0.105139
1	0	0.601825	0	0.623297	0.511813	0.474767	0	0	0
1	0	0.581697	0	0.684223	0.467843	0.496479	0	0	0
1	0	0.697925	0	0.634594	0.519763	0.527914	0	0	0
1	0	0.67108	0	0.684223	0.496479	0.536277	0	0.389224	0.150358
1	0	0.697925	0	0.623297	0.519763	0.496479	0	0	0
1	0	0.67108	0	0.658453	0.474767	0.504055	0	0	0.0899605
1	0	0.612376	0	0.708247	0.491437	0.513912	0	0	0
1	0	0.684223	0	0.684223	0.474767	0.536277	0	0.394635	0.130539
1	0	0.684223	0	0.612382	0.511813	0.527914	0	0	0
1	0	0.684223	0	0.697925	0.489078	0.536277	0	0.383902	0.102927
1	0	0.591604	0	0.623297	0.519763	0.467843	0	0	0
1	0	0.658453	0	0.646303	0.474767	0.511813	0	0	0.0836681
1	0	0.684223	0	0.646303	0.474767	0.496479	0	0	0.0857519
1	0	0.684223	0	0.684223	0.474767	0.544863	0	0.389224	0.135381
1	0	0.712236	0	0.634594	0.511813	0.511813	0	0	0
1	0	0.581697	0	0.67108	0.467843	0.511813	0	0	0
1	0	0.684223	0	0.684223	0.481843	0.544863	0	0.394635	0.152923
1	0	0.601825	0	0.623297	0.504055	0.474767	0	0.339595	0
1	0	0.612376	0	0.708247	0.491437	0.521753	0	0	0
1	0	0.684223	0	0.623297	0.474767	0.504055	0	0	0.0754651
1	0	0.684223	0	0.684223	0.489078	0.527914	0	0.394635	0.105139
1	0	0.591604	0	0.612382	0.511813	0.467843	0	0.344228	0
1	0	0.684223	0	0.623297	0.481843	0.504055	0	0	0.0774963
1	0	0.658453	0	0.658453	0.481843	0.511813	0	0	0.0899605
1	0	0.712236	0	0.634594	0.511813	0.519763	0	0	0
1	0	0.581697	0	0.67108	0.461065	0.489078	0	0	0
1	0	0.591604	0	0.612382	0.504055	0.467843	0	0	0
1	0	0.461065	0	0.67108	0.527914	0.527914	0	0.697925	0.116437
1	0	0.67108	0	0.697925	0.489078	0.536277	0	0.383902	0.121069
1	0	0.612376	0	0.708247	0.48427	0.521753	0	0	0
1	0	0.581697	0	0.684223	0.461065	0.504055	0	0	0
1	0	0.461065	0	0.67108	0.527914	0.527914	0	0.712236	0.11187
1	0	0.684223	0	0.623297	0.474767	0.511813	0	0	0.0694472
1	0	0.461065	0	0.67108	0.519763	0.519763	0	0.712236	0.125769
1	0	0.72243	0	0.645182	0.521753	0.521753	0	0	0
1	0	0.447922	0	0.658453	0.527914	0.527914	0	0.712236	0.123411
1	0	0.461065	0	0.67108	0.536277	0.527914	0	0.712236	0.121069
1	0	0.612376	0	0.708247	0.48427	0.521753	0	0	0
1	0	0.581697	0	0.684223	0.461065	0.504055	0	0	0
1	0	0.658453	0	0.646303	0.474767	0.511813	0	0	0.0815977
1	0	0.612376	0	0.708247	0.48427	0.521753	0	0	0
1	0	0.581697	0	0.67108	0.454426	0.504055	0	0	0
1	0	0.697925	0	0.623297	0.467843	0.489078	0	0	0.0774963
1	0	0.684223	0	0.684223	0.481843	0.527914	0	0.389224	0.114145
1	0	0.684223	0	0.623297	0.481843	0.504055	0	0	0.0734466
1	0	0.67108	0	0.697925	0.489078	0.536277	0	0.383902	0.100729
1	0	0.697925	0	0.634594	0.511813	0.519763	0	0	0
1	0	0.447922	0	0.67108	0.519763	0.519763	0	0.712236	0.118745
1	0	0.697925	0	0.623297	0.467843	0.496479	0	0	0.0795405
1	0	0.684223	0	0.623297	0.527914	0.504055	0	0	0
1	0	0.581697	0	0.612382	0.504055	0.467843	0	0	0
1	0	0.67108	0	0.697925	0.496479	0.527914	0	0.405738	0.128145
1	0	0.581697	0	0.67108	0.461065	0.496479	0	0	0
1	0	0.697925	0	0.634594	0.519763	0.504055	0	0	0
1	0	0.712236	0	0.623297	0.511813	0.511813	0	0	0
1	0	0.581697	0	0.684223	0.461065	0.504055	0	0	0
1	0	0.623297	0	0.612382	0.504055	0.474767	0	0	0
1	0	0.612376	0	0.708247	0.491437	0.513912	0	0	0
1	0	0.461065	0	0.67108	0.519763	0.511813	0	0.712236	0.123411
1	0	0.684223	0	0.634594	0.481843	0.504055	0	0	0.0815977
1	0	0.697925	0	0.634594	0.511813	0.511813	0	0	0
1	0	0.467843	0	0.67108	0.527914	0.519763	0	0.712236	0.11187
1	0	0.684223	0	0.623297	0.504055	0.511813	0	0	0
1	0	0.67108	0	0.634594	0.489078	0.496479	0	0	0.0857519
1	0	0.684223	0	0.684223	0.481843	0.527914	0	0.378667	0.132951
1	0	0.712236	0	0.612382	0.519763	0.511813	0	0	0
1	0	0.581697	0	0.67108	0.461065	0.496479	0	0	0
1	0	0.581697	0	0.67108	0.461065	0.496479	0	0	0
1	0	0.684223	0	0.623297	0.481843	0.504055	0	0	0.0754651
1	0	0.461065	0	0.67108	0.527914	0.527914	0	0.697925	0.118745
1	0	0.697925	0	0.612382	0.519763	0.511813	0	0	0
1	0	0.697925	0	0.612382	0.519763	0.504055	0	0	0
1	0	0.612376	0	0.708247	0.491437	0.513912	0	0	0
1	0	0.697925	0	0.623297	0.511813	0.527914	0	0	0
1	0	0.712236	0	0.634594	0.511813	0.511813	0	0	0
1	0	0.591604	0	0.612382	0.504055	0.461065	0	0	0
1	0	0.697925	0	0.623297	0.527914	0.496479	0	0	0
1	0	0.581697	0	0.67108	0.461065	0.496479	0	0	0
1	0	0.581697	0	0.684223	0.461065	0.504055	0	0	0
1	0	0.581697	0	0.684223	0.461065	0.504055	0	0	0
1	0	0.467843	0	0.67108	0.527914	0.519763	0	0.712236	0.109611
1	0	0.581697	0	0.67108	0.467843	0.511813	0	0	0
1	0	0.591604	0	0.684223	0.467843	0.496479	0	0	0
1	0	0.454426	0	0.67108	0.527914	0.527914	0	0.712236	0.121069
1	0	0.612376	0	0.708247	0.48427	0.521753	0	0	0
1	0	0.658453	0	0.646303	0.474767	0.511813	0	0	0.0899605
1	0	0.684223	0	0.684223	0.489078	0.536277	0	0.389224	0.147813
1	0	0.684223	0	0.634594	0.467843	0.504055	0	0	0.0774963
1	0	0.612376	0	0.708247	0.491437	0.521753	0	0	0
1	0	0.591604	0	0.612382	0.511813	0.461065	0	0	0
1	0	0.591604	0	0.612382	0.504055	0.461065	0	0	0
1	0	0.697925	0	0.623297	0.511813	0.504055	0	0	0
1	0	0.591604	0	0.612382	0.511813	0.467843	0	0	0
1	0	0.684223	0	0.634594	0.474767	0.496479	0	0	0.0795405
1	0	0.581697	0	0.67108	0.467843	0.504055	0	0	0
1	0	0.712236	0	0.623297	0.504055	0.511813	0	0	0
1	0	0.684223	0	0.634594	0.519763	0.504055	0	0	0
1	0	0.454426	0	0.658453	0.519763	0.519763	0	0.712236	0.118745
1	0	0.67108	0	0.684223	0.496479	0.536277	0	0.389224	0.150358
1	0	0.447922	0	0.67108	0.519763	0.519763	0	0.712236	0.128145
1	0	0.67108	0	0.634594	0.481843	0.496479	0	0	0.0878493
1	0	0.612376	0	0.708247	0.491437	0.521753	0	0	0
1	0	0.67108	0	0.634594	0.481843	0.496479	0	0	0.0878493
1	0	0.684223	0	0.646303	0.474767	0.496479	0	0	0.0795405
1	0	0.612376	0	0.708247	0.491437	0.521753	0	0	0
1	0	0.601825	0	0.623297	0.519763	0.467843	0	0	0
1	0	0.454426	0	0.67108	0.527914	0.519763	0	0.712236	0.118745
1	0	0.67108	0	0.697925	0.489078	0.536277	0	0.389224	0.121069
1	0	0.447922	0	0.67108	0.519763	0.511813	0	0.712236	0.118745
1	0	0.612376	0	0.708247	0.491437	0.521753	0	0	0
1	0	0.612376	0	0.708247	0.491437	0.513912	0	0	0
1	0	0.684223	0	0.684223	0.489078	0.527914	0	0.389224	0.107367
1	0	0.581697	0	0.67108	0.461065	0.504055	0	0	0
1	0	0.694643	0	0.633884	0.538013	0.529784	0	0	0
1	0	0.612376	0	0.708247	0.491437	0.521753	0	0	0
1	0	0.612376	0	0.708247	0.48427	0.521753	0	0	0
1	0	0.67108	0	0.684223	0.474767	0.536277	0	0.383902	0.142782
1	0	0.591604	0	0.623297	0.511813	0.474767	0	0	0
1	0	0.684223	0	0.684223	0.489078	0.519763	0	0.400138	0.11187
1	0	0.67108	0	0.684223	0.489078	0.536277	0	0.394635	0.147813
1	0	0.581697	0	0.67108	0.467843	0.511813	0	0	0
1	0	0.591604	0	0.67108	0.461065	0.504055	0	0	0
1	0	0.612376	0	0.708247	0.491437	0.521753	0	0	0
1	0	0.454426	0	0.658453	0.519763	0.519763	0	0.712236	0.118745
1	0	0.684223	0	0.697925	0.489078	0.527914	0	0.383902	0.102927
1	0	0.601825	0	0.623297	0.504055	0.474767	0	0.344228	0
1	0	0.612382	0	0.623297	0.504055	0.467843	0	0	0
1	0	0.612376	0	0.708247	0.491437	0.521753	0	0	0
1	0	0.454426	0	0.67108	0.536277	0.527914	0	0.712236	0.121069
1	0	0.684223	0	0.684223	0.481843	0.536277	0	0.394635	0.140296
1	0	0.581697	0	0.612382	0.504055	0.474767	0	0	0
1	0	0.684223	0	0.646303	0.474767	0.496479	0	0	0.0836681
1	0	0.612382	0	0.623297	0.504055	0.481843	0	0.326085	0
1	0	0.67108	0	0.684223	0.489078	0.536277	0	0.389224	0.155509
1	0	0.591604	0	0.612382	0.511813	0.467843	0	0	0
1	0	0.697925	0	0.634594	0.519763	0.519763	0	0	0
1	0	0.697925	0	0.634594	0.519763	0.511813	0	0	0
1	0	0.581697	0	0.684223	0.461065	0.504055	0	0	0
1	0	0.581697	0	0.67108	0.461065	0.496479	0	0	0
1	0	0.684223	0	0.646303	0.474767	0.496479	0	0	0.0878493
1	0	0.67108	0	0.684223	0.489078	0.544863	0	0.383902	0.142782
1	0	0.591604	0	0.612382	0.511813	0.474767	0	0	0
1	0	0.612376	0	0.708247	0.48427	0.521753	0	0	0
1	0	0.697925	0	0.623297	0.511813	0.511813	0	0	0
1	0	0.461065	0	0.67108	0.536277	0.519763	0	0.697925	0.125769
1	0	0.697925	0	0.623297	0.474767	0.504055	0	0	0.0734466
1	0	0.684223	0	0.623297	0.467843	0.504055	0	0	0.0734466
1	0	0.684223	0	0.646303	0.474767	0.496479	0	0	0.0815977
1	0	0.697925	0	0.634594	0.461065	0.504055	0	0	0.0754651
1	0	0.67108	0	0.684223	0.489078	0.536277	0	0.394635	0.150358
1	0	0.447922	0	0.67108	0.519763	0.511813	0	0.712236	0.118745
1	0	0.581697	0	0.67108	0.461065	0.496479	0	0	0
1	0	0.67108	0	0.634594	0.481843	0.496479	0	0	0.0815977
1	0	0.612376	0	0.708247	0.491437	0.513912	0	0	0
1	0	0.684223	0	0.684223	0.481843	0.544863	0	0.400138	0.152923
1	0	0.612376	0	0.708247	0.491437	0.521753	0	0	0
1	0	0.581697	0	0.684223	0.467843	0.496479	0	0	0
1	0	0.67108	0	0.684223	0.489078	0.527914	0	0.378667	0.145287
1	0	0.581697	0	0.67108	0.461065	0.496479	0	0	0
1	0	0.684223	0	0.634594	0.474767	0.496479	0	0	0.0836681
1	0	0.658453	0	0.658453	0.474767	0.511813	0	0	0.0899605
1	0	0.581697	0	0.67108	0.467843	0.511813	0	0	0
1	0	0.612382	0	0.623297	0.504055	0.461065	0	0.353697	0
1	0	0.694643	0	0.633884	0.54645	0.529784	0	0	0
1	0	0.591604	0	0.612382	0.511813	0.467843	0	0	0
1	0	0.694643	0	0.633884	0.54645	0.521753	0	0	0
1	0	0.684223	0	0.697925	0.489078	0.536277	0	0.383902	0.102927
1	0	0.612376	0	0.708247	0.491437	0.521753	0	0	0
1	0	0.454426	0	0.67108	0.519763	0.519763	0	0.712236	0.125769
1	0	0.612376	0	0.708247	0.491437	0.513912	0	0	0
1	0	0.697925	0	0.623297	0.519763	0.519763	0	0	0
1	0	0.581697	0	0.612382	0.504055	0.474767	0	0	0
1	0	0.684223	0	0.623297	0.511813	0.504055	0	0	0
1	0	0.684223	0	0.684223	0.489078	0.527914	0	0.400138	0.109611
1	0	0.697925	0	0.623297	0.519763	0.519763	0	0	0
1	0	0.612376	0	0.708247	0.491437	0.513912	0	0	0
1	0	0.697925	0	0.623297	0.511813	0.519763	0	0	0
1	0	0.447922	0	0.67108	0.527914	0.519763	0	0.712236	0.121069
1	0	0.67108	0	0.634594	0.474767	0.504055	0	0	0.0815977
1	0	0.461065	0	0.67108	0.527914	0.519763	0	0.697925	0.116437
1	0	0.612376	0	0.708247	0.48427	0.521753	0	0	0
1	0	0.612376	0	0.708247	0.491437	0.521753	0	0	0
1	0	0.454426	0	0.67108	0.527914	0.519763	0	0.697925	0.118745
1	0	0.712236	0	0.623297	0.504055	0.504055	0	0	0
1	0	0.612382	0	0.623297	0.504055	0.467843	0	0.344228	0
1	0	0.591604	0	0.623297	0.511813	0.467843	0	0	0
1	0	0.712236	0	0.623297	0.504055	0.519763	0	0	0
1	0	0.684223	0	0.684223	0.489078	0.527914	0	0.378667	0.109611
1	0	0.684223	0	0.684223	0.489078	0.527914	0	0.383902	0.105139
1	0	0.601825	0	0.623297	0.504055	0.467843	0	0	0
1	0	0.581697	0	0.67108	0.467843	0.496479	0	0	0
1	0	0.601825	0	0.612382	0.496479	0.467843	0	0.353697	0
1	0	0.684223	0	0.623297	0.527914	0.504055	0	0	0
1	0	0.581697	0	0.67108	0.461065	0.496479	0	0	0
1	0	0.684223	0	0.684223	0.481843	0.519763	0	0.383902	0.121069
1	0	0.612376	0	0.708247	0.491437	0.521753	0	0	0
1	0	0.447922	0	0.67108	0.527914	0.519763	0	0.712236	0.118745
1	0	0.581697	0	0.612382	0.504055	0.467843	0	0	0
1	0	0.67108	0	0.697925	0.489078	0.536277	0	0.383902	0.116437
1	0	0.441547	0	0.67108	0.519763	0.511813	0	0.712236	0.118745
1	0	0.581697	0	0.612382	0.504055	0.467843	0	0	0
1	0	0.447922	0	0.67108	0.527914	0.527914	0	0.712236	0.123411
1	0	0.712236	0	0.623297	0.504055	0.511813	0	0	0
1	0	0.581697	0	0.67108	0.461065	0.496479	0	0	0
1	0	0.697925	0	0.623297	0.511813	0.511813	0	0	0
1	0	0.467843	0	0.67108	0.527914	0.519763	0	0.712236	0.109611
1	0	0.612376	0	0.708247	0.491437	0.521753	0	0	0
1	0	0.684223	0	0.697925	0.489078	0.527914	0	0.394635	0.11187
1	0	0.697925	0	0.634594	0.474767	0.504055	0	0	0.0754651
1	0	0.712236	0	0.623297	0.504055	0.511813	0	0	0
1	0	0.612376	0	0.708247	0.491437	0.521753	0	0	0
1	0	0.581697	0	0.612382	0.504055	0.474767	0	0	0
1	0	0.684223	0	0.646303	0.474767	0.496479	0	0	0.0774963
1	0	0.467843	0	0.67108	0.527914	0.519763	0	0.697925	0.114145
1	0	0.67108	0	0.646303	0.481843	0.496479	0	0	0.0899605
1	0	0.67108	0	0.697925	0.489078	0.536277	0	0.389224	0.121069
1	0	0.581697	0	0.67108	0.461065	0.496479	0	0	0
1	0	0.447922	0	0.67108	0.519763	0.519763	0	0.712236	0.121069
1	0	0.612376	0	0.708247	0.491437	0.521753	0	0	0
1	0	0.454426	0	0.67108	0.527914	0.519763	0	0.712236	0.118745
1	0	0.72243	0	0.645182	0.513912	0.529784	0	0	0
1	0	0.708247	0	0.645182	0.538013	0.521753	0	0	0
1	0	0.67108	0	0.697925	0.496479	0.527914	0	0.405738	0.128145
1	0	0.697925	0	0.623297	0.519763	0.504055	0	0	0
1	0	0.684223	0	0.684223	0.489078	0.527914	0	0.400138	0.11187
1	0	0.581697	0	0.67108	0.461065	0.496479	0	0	0
1	0	0.697925	0	0.623297	0.467843	0.496479	0	0	0.0714407
1	0	0.684223	0	0.634594	0.474767	0.489078	0	0	0.0754651
1	0	0.712236	0	0.623297	0.519763	0.511813	0	0	0
1	0	0.684223	0	0.623297	0.474767	0.504055	0	0	0.0734466
1	0	0.697925	0	0.623297	0.474767	0.504055	0	0	0.0774963
1	0	0.737244	0	0.645182	0.521753	0.538013	0	0	0
1	0	0.581697	0	0.612382	0.504055	0.474767	0	0	0
1	0	0.581697	0	0.684223	0.467843	0.496479	0	0	0
1	0	0.454426	0	0.67108	0.527914	0.519763	0	0.712236	0.118745
1	0	0.67108	0	0.646303	0.474767	0.504055	0	0	0.0857519
1	0	0.67108	0	0.684223	0.489078	0.536277	0	0.394635	0.11187
1	0	0.581697	0	0.67108	0.467843	0.511813	0	0	0
1	0	0.684223	0	0.634594	0.511813	0.519763	0	0	0
1	0	0.581697	0	0.684223	0.467843	0.489078	0	0	0
1	0	0.684223	0	0.623297	0.481843	0.511813	0	0	0.0774963
1	0	0.697925	0	0.623297	0.527914	0.511813	0	0	0
1	0	0.581697	0	0.67108	0.467843	0.511813	0	0	0
1	0	0.67108	0	0.684223	0.489078	0.536277	0	0.389224	0.150358
1	0	0.601825	0	0.623297	0.504055	0.474767	0	0	0
1	0	0.612382	0	0.623297	0.504055	0.474767	0	0	0
1	0	0.581697	0	0.67108	0.461065	0.504055	0	0	0
1	0	0.697925	0	0.623297	0.519763	0.511813	0	0	0
1	0	0.612382	0	0.623297	0.511813	0.474767	0	0.339595	0
1	0	0.591604	0	0.612382	0.511813	0.467843	0	0	0
1	0	0.697925	0	0.634594	0.467843	0.511813	0	0	0.0795405
1	0	0.612376	0	0.708247	0.48427	0.521753	0	0	0
1	0	0.684223	0	0.684223	0.489078	0.519763	0	0.400138	0.107367
1	0	0.697925	0	0.623297	0.519763	0.504055	0	0	0
1	0	0.697925	0	0.634594	0.467843	0.496479	0	0	0.0754651
1	0	0.612382	0	0.623297	0.496479	0.467843	0	0.344228	0
1	0	0.461065	0	0.67108	0.536277	0.527914	0	0.712236	0.123411
1	0	0.612376	0	0.708247	0.491437	0.513912	0	0	0
1	0	0.581697	0	0.612382	0.504055	0.467843	0	0	0
1	0	0.684223	0	0.634594	0.481843	0.496479	0	0	0.0795405
1	0	0.612376	0	0.708247	0.491437	0.521753	0	0	0
1	0	0.461065	0	0.67108	0.519763	0.511813	0	0.712236	0.123411
1	0	0.447922	0	0.67108	0.519763	0.519763	0	0.712236	0.118745
1	0	0.454426	0	0.67108	0.519763	0.519763	0	0.712236	0.128145
1	0	0.697925	0	0.623297	0.511813	0.496479	0	0	0
1	0	0.697925	0	0.623297	0.519763	0.519763	0	0	0
1	0	0.67108	0	0.646303	0.467843	0.504055	0	0	0.0878493
1	0	0.67108	0	0.684223	0.489078	0.527914	0	0.389224	0.137829
1	0	0.467843	0	0.67108	0.527914	0.519763	0	0.712236	0.11187
1	0	0.684223	0	0.634594	0.481843	0.496479	0	0	0.0857519
1	0	0.612376	0	0.708247	0.491437	0.521753	0	0	0
1	0	0.581697	0	0.684223	0.467843	0.496479	0	0	0
1	0	0.67108	0	0.697925	0.489078	0.536277	0	0.389224	0.107367
1	0	0.684223	0	0.684223	0.489078	0.527914	0	0.394635	0.11187
1	0	0.581697	0	0.684223	0.467843	0.489078	0	0	0
1	0	0.612376	0	0.708247	0.491437	0.513912	0	0	0
1	0	0.572086	0	0.67108	0.467843	0.511813	0	0	0
1	0	0.581697	0	0.684223	0.461065	0.504055	0	0	0
1	0	0.697925	0	0.612382	0.519763	0.519763	0	0	0
1	0	0.623297	0	0.623297	0.504055	0.481843	0	0	0
1	0	0.684223	0	0.634594	0.467843	0.511813	0	0	0.0754651
1	0	0.697925	0	0.623297	0.527914	0.496479	0	0	0
1	0	0.697925	0	0.623297	0.519763	0.511813	0	0	0
1	0	0.612382	0	0.623297	0.519763	0.474767	0	0	0
1	0	0.612376	0	0.708247	0.48427	0.521753	0	0	0
1	0	0.447922	0	0.67108	0.527914	0.519763	0	0.712236	0.125769
1	0	0.591604	0	0.623297	0.511813	0.467843	0	0	0
1	0	0.684223	0	0.697925	0.496479	0.527914	0	0.405738	0.121069
1	0	0.684223	0	0.623297	0.467843	0.504055	0	0	0.0754651
1	0	0.454426	0	0.67108	0.527914	0.519763	0	0.712236	0.118745
1	0	0.581697	0	0.67108	0.461065	0.496479	0	0	0
1	0	0.684223	0	0.646303	0.474767	0.496479	0	0	0.0878493
1	0	0.454426	0	0.658453	0.519763	0.519763	0	0.712236	0.125769
1	0	0.712236	0	0.623297	0.504055	0.511813	0	0	0
1	0	0.684223	0	0.634594	0.481843	0.504055	0	0	0.0836681
1	0	0.454426	0	0.67108	0.527914	0.519763	0	0.712236	0.121069
1	0	0.467843	0	0.67108	0.527914	0.527914	0	0.712236	0.107367
1	0	0.581697	0	0.67108	0.461065	0.496479	0	0	0
1	0	0.658453	0	0.634594	0.481843	0.504055	0	0	0.0899605
1	0	0.684223	0	0.697925	0.489078	0.519763	0	0.400138	0.118745
1	0	0.612382	0	0.623297	0.504055	0.467843	0	0	0
1	0	0.67108	0	0.684223	0.489078	0.544863	0	0.383902	0.137829
1	0	0.612376	0	0.708247	0.491437	0.521753	0	0	0
1	0	0.658453	0	0.646303	0.474767	0.511813	0	0	0.0795405
1	0	0.697925	0	0.623297	0.511813	0.519763	0	0	0
1	0	0.612376	0	0.708247	0.491437	0.513912	0	0	0
1	0	0.67108	0	0.697925	0.489078	0.536277	0	0.378667	0.107367
1	0	0.737244	0	0.645182	0.513912	0.529784	0	0	0
1	0	0.684223	0	0.623297	0.474767	0.504055	0	0	0.0694472
1	0	0.581697	0	0.67108	0.467843	0.511813	0	0	0
1	0	0.581697	0	0.684223	0.467843	0.496479	0	0	0
1	0	0.684223	0	0.623297	0.511813	0.511813	0	0	0
1	0	0.612376	0	0.708247	0.491437	0.521753	0	0	0
1	0	0.591604	0	0.67108	0.461065	0.504055	0	0	0
1	0	0.712236	0	0.623297	0.504055	0.504055	0	0	0
1	0	0.591604	0	0.612382	0.504055	0.467843	0	0	0
1	0	0.684223	0	0.623297	0.504055	0.511813	0	0	0
1	0	0.612376	0	0.708247	0.491437	0.521753	0	0	0
1	0	0.612382	0	0.623297	0.504055	0.481843	0	0.353697	0
1	0	0.612376	0	0.708247	0.491437	0.521753	0	0	0
1	0	0.581697	0	0.67108	0.467843	0.511813	0	0	0
1	0	0.684223	0	0.697925	0.489078	0.527914	0	0.400138	0.121069
1	0	0.67108	0	0.684223	0.496479	0.536277	0	0.389224	0.142782
1	0	0.612382	0	0.623297	0.504055	0.467843	0	0	0
1	0	0.67108	0	0.697925	0.489078	0.536277	0	0.400138	0.107367
1	0	0.612376	0	0.708247	0.491437	0.513912	0	0	0
1	0	0.581697	0	0.67108	0.461065	0.496479	0	0	0
1	0	0.658453	0	0.634594	0.481843	0.504055	0	0	0.0899605
1	0	0.658453	0	0.658453	0.474767	0.511813	0	0	0.0857519
1	0	0.454426	0	0.67108	0.536277	0.527914	0	0.712236	0.121069
1	0	0.67108	0	0.684223	0.489078	0.527914	0	0.389224	0.114145
1	0	0.581697	0	0.67108	0.461065	0.504055	0	0	0
1	0	0.461065	0	0.67108	0.536277	0.527914	0	0.712236	0.123411
1	0	0.697925	0	0.612382	0.511813	0.511813	0	0	0
1	0	0.461065	0	0.67108	0.527914	0.527914	0	0.712236	0.11187
1	0	0.581697	0	0.684223	0.467843	0.496479	0	0	0
1	0	0.591604	0	0.612382	0.504055	0.461065	0	0	0
1	0	0.461065	0	0.67108	0.519763	0.519763	0	0.712236	0.125769
1	0	0.67108	0	0.646303	0.474767	0.504055	0	0	0.0878493
1	0	0.581697	0	0.67108	0.461065	0.496479	0	0	0
1	0	0.684223	0	0.634594	0.474767	0.496479	0	0	0.0878493
1	0	0.454426	0	0.67108	0.536277	0.527914	0	0.697925	0.128145
1	0	0.461065	0	0.67108	0.527914	0.527914	0	0.697925	0.114145
1	0	0.461065	0	0.67108	0.527914	0.527914	0	0.697925	0.11187
1	0	0.67108	0	0.634594	0.489078	0.489078	0	0	0.0942247
1	0	0.581697	0	0.612382	0.504055	0.474767	0	0	0
1	0	0.697925	0	0.623297	0.527914	0.519763	0	0	0
1	0	0.697925	0	0.634594	0.527914	0.536277	0	0	0
1	0	0.612382	0	0.623297	0.504055	0.461065	0	0	0
1	0	0.612376	0	0.708247	0.491437	0.521753	0	0	0
1	0	0.454426	0	0.658453	0.519763	0.519763	0	0.712236	0.121069
1	0	0.461065	0	0.67108	0.536277	0.519763	0	0.712236	0.123411
1	0	0.697925	0	0.634594	0.474767	0.496479	0	0	0.0734466
1	0	0.684223	0	0.684223	0.474767	0.544863	0	0.389224	0.130539
1	0	0.67108	0	0.697925	0.489078	0.527914	0	0.400138	0.102927
1	0	0.454426	0	0.67108	0.527914	0.519763	0	0.712236	0.121069
1	0	0.581697	0	0.67108	0.461065	0.496479	0	0	0
1	0	0.581697	0	0.67108	0.461065	0.496479	0	0	0
1	0	0.581697	0	0.67108	0.467843	0.511813	0	0	0
1	0	0.591604	0	0.612382	0.511813	0.467843	0	0	0
1	0	0.697925	0	0.634594	0.467843	0.504055	0	0	0.0795405
1	0	0.694643	0	0.645182	0.54645	0.521753	0	0	0
1	0	0.581697	0	0.684223	0.467843	0.496479	0	0	0
1	0	0.461065	0	0.658453	0.519763	0.527914	0	0.712236	0.130539
1	0	0.684223	0	0.634594	0.481843	0.489078	0	0	0.0878493
1	0	0.708247	0	0.645182	0.529784	0.521753	0	0	0
1	0	0.461065	0	0.67108	0.519763	0.519763	0	0.712236	0.125769
1	0	0.591604	0	0.623297	0.511813	0.474767	0	0	0
1	0	0.67108	0	0.646303	0.474767	0.504055	0	0	0.0878493
1	0	0.612376	0	0.708247	0.491437	0.513912	0	0	0
1	0	0.612376	0	0.708247	0.491437	0.521753	0	0	0
1	0	0.461065	0	0.67108	0.519763	0.511813	0	0.712236	0.123411
1	0	0.461065	0	0.67108	0.536277	0.527914	0	0.697925	0.123411
1	0	0.658453	0	0.646303	0.474767	0.519763	0	0	0.0878493
1	0	0.67108	0	0.634594	0.481843	0.496479	0	0	0.0795405
1	0	0.67108	0	0.658453	0.474767	0.504055	0	0	0.0878493
1	0	0.684223	0	0.634594	0.481843	0.496479	0	0	0.0899605
1	0	0.612376	0	0.708247	0.491437	0.521753	0	0	0
1	0	0.612376	0	0.708247	0.491437	0.513912	0	0	0
1	0	0.684223	0	0.684223	0.489078	0.519763	0	0.400138	0.102927
1	0	0.67108	0	0.684223	0.489078	0.536277	0	0.383902	0.132951
1	0	0.67108	0	0.684223	0.489078	0.536277	0	0.378667	0.137829
1	0	0.67108	0	0.684223	0.496479	0.536277	0	0.389224	0.155509
1	0	0.67108	0	0.684223	0.489078	0.527914	0	0.383902	0.137829
1	0	0.684223	0	0.684223	0.481843	0.536277	0	0.389224	0.137829
1	0	0.684223	0	0.646303	0.474767	0.496479	0	0	0.0836681
1	0	0.712236	0	0.634594	0.511813	0.511813	0	0	0
1	0	0.581697	0	0.67108	0.461065	0.496479	0	0	0
1	0	0.581697	0	0.67108	0.467843	0.511813	0	0	0
1	0	0.697925	0	0.623297	0.511813	0.511813	0	0	0
1	0	0.447922	0	0.67108	0.527914	0.527914	0	0.712236	0.123411
1	0	0.612376	0	0.708247	0.491437	0.521753	0	0	0
1	0	0.454426	0	0.67108	0.527914	0.527914	0	0.712236	0.121069
1	0	0.67108	0	0.697925	0.489078	0.536277	0	0.400138	0.116437
1	0	0.612376	0	0.708247	0.491437	0.521753	0	0	0
1	0	0.581697	0	0.67108	0.461065	0.496479	0	0	0
1	0	0.67108	0	0.634594	0.481843	0.496479	0	0	0.0836681
1	0	0.591604	0	0.612382	0.504055	0.461065	0	0.330526	0
1	0	0.67108	0	0.684223	0.489078	0.544863	0	0.378667	0.155509
1	0	0.461065	0	0.67108	0.519763	0.511813	0	0.712236	0.128145
1	0	0.581697	0	0.612382	0.511813	0.474767	0	0	0
1	0	0.697925	0	0.623297	0.527914	0.519763	0	0	0
1	0	0.612376	0	0.708247	0.491437	0.521753	0	0	0
1	0	0.591604	0	0.612382	0.504055	0.467843	0	0	0
1	0	0.581697	0	0.67108	0.467843	0.504055	0	0	0
1	0	0.684223	0	0.697925	0.489078	0.527914	0	0.389224	0.109611
1	0	0.581697	0	0.684223	0.461065	0.504055	0	0	0
1	0	0.712236	0	0.623297	0.504055	0.504055	0	0	0
1	0	0.581697	0	0.67108	0.467843	0.496479	0	0	0
1	0	0.684223	0	0.684223	0.489078	0.536277	0	0.394635	0.155509
1	0	0.581697	0	0.684223	0.467843	0.496479	0	0	0
1	0	0.612382	0	0.623297	0.504055	0.467843	0	0	0
1	0	0.684223	0	0.646303	0.474767	0.496479	0	0	0.0774963
1	0	0.461065	0	0.67108	0.536277	0.527914	0	0.712236	0.123411
1	0	0.447922	0	0.67108	0.527914	0.519763	0	0.712236	0.123411
1	0	0.684223	0	0.623297	0.481843	0.511813	0	0	0.0734466
1	0	0.684223	0	0.623297	0.467843	0.504055	0	0	0.0734466
1	0	0.697925	0	0.634594	0.474767	0.504055	0	0	0.0774963
1	0	0.461065	0	0.67108	0.536277	0.527914	0	0.712236	0.118745
1	0	0.612382	0	0.623297	0.504055	0.481843	0	0.368446	0
1	0	0.601825	0	0.623297	0.519763	0.467843	0	0	0
1	0	0.601825	0	0.623297	0.511813	0.474767	0	0	0
1	0	0.461065	0	0.67108	0.536277	0.519763	0	0.697925	0.116437
1	0	0.67108	0	0.697925	0.489078	0.536277	0	0.389224	0.105139
1	0	0.712236	0	0.634594	0.527914	0.527914	0	0	0
1	0	0.67108	0	0.684223	0.481843	0.527914	0	0.389224	0.123411
1	0	0.601825	0	0.623297	0.519763	0.467843	0	0	0
1	0	0.581697	0	0.612382	0.511813	0.474767	0	0	0
1	0	0.581697	0	0.67108	0.467843	0.496479	0	0	0
1	0	0.612382	0	0.623297	0.504055	0.474767	0	0	0
1	0	0.447922	0	0.67108	0.519763	0.511813	0	0.712236	0.116437
1	0	0.67108	0	0.684223	0.489078	0.544863	0	0.389224	0.102927
1	0	0.612376	0	0.708247	0.48427	0.521753	0	0	0
1	0	0.684223	0	0.623297	0.511813	0.504055	0	0	0
1	0	0.612382	0	0.623297	0.504055	0.467843	0	0.348928	0
1	0	0.591604	0	0.67108	0.461065	0.504055	0	0	0
1	0	0.467843	0	0.67108	0.527914	0.527914	0	0.712236	0.109611
1	0	0.684223	0	0.684223	0.481843	0.544863	0	0.394635	0.135381
1	0	0.67108	0	0.684223	0.489078	0.544863	0	0.378667	0.142782
1	0	0.612382	0	0.623297	0.504055	0.467843	0	0.326085	0
1	0	0.712236	0	0.623297	0.519763	0.511813	0	0	0
1	0	0.612382	0	0.623297	0.504055	0.474767	0	0.358539	0
1	0	0.461065	0	0.67108	0.536277	0.527914	0	0.712236	0.121069
1	0	0.684223	0	0.623297	0.467843	0.504055	0	0	0.0714407
1	0	0.684223	0	0.623297	0.504055	0.504055	0	0	0
1	0	0.697925	0	0.612382	0.511813	0.511813	0	0	0
1	0	0.581697	0	0.67108	0.467843	0.504055	0	0	0
1	0	0.684223	0	0.684223	0.489078	0.527914	0	0.383902	0.105139
1	0	0.591604	0	0.612382	0.504055	0.461065	0	0	0
1	0	0.67108	0	0.684223	0.489078	0.536277	0	0.389224	0.147813
1	0	0.591604	0	0.684223	0.467843	0.496479	0	0	0
1	0	0.612376	0	0.708247	0.491437	0.513912	0	0	0
1	0	0.697925	0	0.623297	0.519763	0.496479	0	0	0
1	0	0.461065	0	0.67108	0.519763	0.527914	0	0.712236	0.130539
1	0	0.67108	0	0.684223	0.489078	0.544863	0	0.378667	0.137829
1	0	0.67108	0	0.634594	0.474767	0.496479	0	0	0.0836681
1	0	0.454426	0	0.67108	0.519763	0.519763	0	0.712236	0.130539
1	0	0.684223	0	0.646303	0.474767	0.496479	0	0	0.0857519
1	0	0.581697	0	0.67108	0.467843	0.511813	0	0	0
1	0	0.581697	0	0.67108	0.461065	0.496479	0	0	0
1	0	0.67108	0	0.646303	0.474767	0.504055	0	0	0.0857519
1	0	0.612382	0	0.623297	0.504055	0.467843	0	0.348928	0
1	0	0.67108	0	0.684223	0.496479	0.544863	0	0.394635	0.152923
1	0	0.708247	0	0.633884	0.538013	0.521753	0	0	0
1	0	0.612376	0	0.708247	0.48427	0.521753	0	0	0
1	0	0.67108	0	0.684223	0.489078	0.536277	0	0.389224	0.150358
1	0	0.623297	0	0.612382	0.504055	0.481843	0	0.339595	0
1	0	0.697925	0	0.634594	0.504055	0.504055	0	0	0
1	0	0.461065	0	0.67108	0.527914	0.527914	0	0.712236	0.109611
1	0	0.581697	0	0.67108	0.467843	0.511813	0	0	0
1	0	0.612376	0	0.708247	0.491437	0.521753	0	0	0
1	0	0.612376	0	0.708247	0.491437	0.513912	0	0	0
1	0	0.612376	0	0.708247	0.491437	0.521753	0	0	0
1	0	0.697925	0	0.634594	0.474767	0.496479	0	0	0.0714407
1	0	0.454426	0	0.67108	0.519763	0.519763	0	0.712236	0.123411
1	0	0.623297	0	0.612382	0.504055	0.474767	0	0.363454	0
1	0	0.612376	0	0.708247	0.491437	0.513912	0	0	0
1	0	0.684223	0	0.697925	0.496479	0.527914	0	0.400138	0.118745
1	0	0.684223	0	0.684223	0.489078	0.536277	0	0.394635	0.155509
1	0	0.461065	0	0.67108	0.527914	0.527914	0	0.697925	0.11187
1	0	0.712236	0	0.634594	0.519763	0.496479	0	0	0
1	0	0.712236	0	0.623297	0.504055	0.511813	0	0	0
1	0	0.581697	0	0.67108	0.467843	0.511813	0	0	0
1	0	0.712236	0	0.623297	0.504055	0.511813	0	0	0
1	0	0.591604	0	0.684223	0.467843	0.496479	0	0	0
1	0	0.591604	0	0.612382	0.511813	0.467843	0	0	0
1	0	0.591604	0	0.612382	0.511813	0.474767	0	0	0
1	0	0.67108	0	0.684223	0.489078	0.544863	0	0.383902	0.142782
1	0	0.697925	0	0.634594	0.474767	0.496479	0	0	0.0714407
1	0	0.581697	0	0.67108	0.461065	0.504055	0	0	0
1	0	0.612376	0	0.708247	0.491437	0.513912	0	0	0
1	0	0.697925	0	0.634594	0.511813	0.519763	0	0	0
1	0	0.461065	0	0.67108	0.527914	0.527914	0	0.712236	0.116437
1	0	0.67108	0	0.697925	0.489078	0.536277	0	0.400138	0.100729
1	0	0.581697	0	0.67108	0.461065	0.496479	0	0	0
1	0	0.67108	0	0.684223	0.489078	0.536277	0	0.389224	0.150358
1	0	0.67108	0	0.684223	0.489078	0.544863	0	0.383902	0.142782
1	0	0.461065	0	0.67108	0.536277	0.527914	0	0.712236	0.121069
1	0	0.612376	0	0.708247	0.491437	0.521753	0	0	0
1	0	0.712236	0	0.612382	0.511813	0.504055	0	0	0
1	0	0.697925	0	0.612382	0.527914	0.519763	0	0	0
1	0	0.612382	0	0.612382	0.504055	0.467843	0	0	0
1	0	0.612382	0	0.623297	0.504055	0.481843	0	0	0
1	0	0.467843	0	0.67108	0.527914	0.519763	0	0.712236	0.109611
1	0	0.684223	0	0.697925	0.489078	0.527914	0	0.405738	0.114145
1	0	0.454426	0	0.67108	0.536277	0.527914	0	0.697925	0.125769
1	0	0.591604	0	0.612382	0.504055	0.474767	0	0	0
1	0	0.612382	0	0.623297	0.504055	0.467843	0	0.353697	0
1	0	0.684223	0	0.684223	0.489078	0.519763	0	0.378667	0.114145
1	0	0.684223	0	0.623297	0.474767	0.504055	0	0	0.0714407
1	0	0.684223	0	0.684223	0.489078	0.527914	0	0.394635	0.102927
1	0	0.67108	0	0.684223	0.489078	0.527914	0	0.378667	0.137829
1	0	0.67108	0	0.634594	0.489078	0.496479	0	0	0.0878493
1	0	0.461065	0	0.67108	0.536277	0.519763	0	0.697925	0.125769
1	0	0.581697	0	0.684223	0.467843	0.496479	0	0	0
1	0	0.684223	0	0.684223	0.489078	0.519763	0	0.400138	0.109611
1	0	0.697925	0	0.634594	0.519763	0.511813	0	0	0
1	0	0.612376	0	0.708247	0.491437	0.521753	0	0	0
1	0	0.581697	0	0.67108	0.461065	0.496479	0	0	0
1	0	0.684223	0	0.634594	0.519763	0.511813	0	0	0
1	0	0.454426	0	0.67108	0.527914	0.519763	0	0.712236	0.118745
1	0	0.581697	0	0.684223	0.461065	0.504055	0	0	0
1	0	0.697925	0	0.612382	0.519763	0.519763	0	0	0
1	0	0.697925	0	0.623297	0.519763	0.511813	0	0	0
1	0	0.454426	0	0.658453	0.519763	0.519763	0	0.712236	0.118745
1	0	0.581697	0	0.684223	0.467843	0.489078	0	0	0
1	0	0.67108	0	0.684223	0.481843	0.536277	0	0.394635	0.150358
1	0	0.684223	0	0.646303	0.474767	0.496479	0	0	0.0774963
1	0	0.658453	0	0.658453	0.474767	0.511813	0	0	0.0815977
1	0	0.684223	0	0.623297	0.474767	0.511813	0	0	0.067466
1	0	0.684223	0	0.684223	0.489078	0.527914	0	0.389224	0.100729
1	0	0.684223	0	0.684223	0.489078	0.527914	0	0.389224	0.102927
1	0	0.623297	0	0.612382	0.504055	0.481843	0	0	0
1	0	0.581697	0	0.67108	0.461065	0.496479	0	0	0
1	0	0.67108	0	0.623297	0.481843	0.489078	0	0	0.0878493
1	0	0.612382	0	0.623297	0.519763	0.481843	0	0.339595	0
1	0	0.612376	0	0.708247	0.491437	0.521753	0	0	0
1	0	0.581697	0	0.67108	0.474767	0.504055	0	0	0
1	0	0.697925	0	0.646303	0.519763	0.511813	0	0	0
1	0	0.581697	0	0.684223	0.461065	0.504055	0	0	0
1	0	0.67108	0	0.697925	0.489078	0.536277	0	0.389224	0.116437
1	0	0.684223	0	0.612382	0.527914	0.519763	0	0	0
1	0	0.612376	0	0.708247	0.491437	0.521753	0	0	0
1	0	0.612376	0	0.708247	0.491437	0.513912	0	0	0
1	0	0.612376	0	0.708247	0.491437	0.521753	0	0	0
1	0	0.67108	0	0.684223	0.481843	0.527914	0	0.383902	0.142782
1	0	0.697925	0	0.623297	0.511813	0.496479	0	0	0
1	0	0.612376	0	0.708247	0.491437	0.513912	0	0	0
1	0	0.67108	0	0.684223	0.489078	0.544863	0	0.389224	0.132951
1	0	0.612376	0	0.708247	0.491437	0.513912	0	0	0
1	0	0.684223	0	0.634594	0.467843	0.511813	0	0	0.0754651
1	0	0.591604	0	0.612382	0.511813	0.467843	0	0	0
1	0	0.591604	0	0.612382	0.511813	0.474767	0	0	0
1	0	0.461065	0	0.67108	0.536277	0.527914	0	0.712236	0.121069
1	0	0.581697	0	0.67108	0.467843	0.496479	0	0	0
1	0	0.684223	0	0.646303	0.474767	0.496479	0	0	0.0795405
1	0	0.612376	0	0.708247	0.491437	0.513912	0	0	0
1	0	0.67108	0	0.697925	0.489078	0.536277	0	0.378667	0.102927
1	0	0.697925	0	0.623297	0.467843	0.496479	0	0	0.0714407
1	0	0.581697	0	0.684223	0.467843	0.504055	0	0	0
1	0	0.684223	0	0.623297	0.511813	0.511813	0	0	0
1	0	0.581697	0	0.67108	0.467843	0.511813	0	0	0
1	0	0.591604	0	0.623297	0.519763	0.467843	0	0	0
1	0	0.67108	0	0.697925	0.489078	0.527914	0	0.389224	0.107367
1	0	0.67108	0	0.684223	0.496479	0.544863	0	0.378667	0.147813
1	0	0.684223	0	0.623297	0.474767	0.511813	0	0	0.0694472
1	0	0.658453	0	0.646303	0.481843	0.511813	0	0	0.0920855
1	0	0.67108	0	0.684223	0.489078	0.544863	0	0.394635	0.150358
1	0	0.684223	0	0.634594	0.481843	0.496479	0	0	0.0899605
1	0	0.581697	0	0.684223	0.461065	0.504055	0	0	0
1	0	0.612376	0	0.708247	0.491437	0.521753	0	0	0
1	0	0.684223	0	0.634594	0.481843	0.496479	0	0	0.0878493
1	0	0.684223	0	0.646303	0.474767	0.496479	0	0	0.0774963
1	0	0.697925	0	0.634594	0.527914	0.511813	0	0	0
1	0	0.581697	0	0.684223	0.467843	0.496479	0	0	0
1	0	0.581697	0	0.612382	0.504055	0.467843	0	0	0
1	0	0.697925	0	0.623297	0.527914	0.527914	0	0	0
1	0	0.612376	0	0.708247	0.491437	0.513912	0	0	0
1	0	0.67108	0	0.634594	0.489078	0.496479	0	0	0.0878493
1	0	0.601825	0	0.623297	0.519763	0.467843	0	0	0
1	0	0.612376	0	0.708247	0.48427	0.521753	0	0	0
1	0	0.67108	0	0.684223	0.496479	0.544863	0	0.378667	0.147813
1	0	0.712236	0	0.623297	0.504055	0.511813	0	0	0
1	0	0.623297	0	0.612382	0.504055	0.474767	0	0	0
1	0	0.461065	0	0.67108	0.536277	0.519763	0	0.697925	0.121069
1	0	0.697925	0	0.623297	0.519763	0.519763	0	0	0
1	0	0.461065	0	0.67108	0.536277	0.527914	0	0.712236	0.123411
1	0	0.591604	0	0.612382	0.504055	0.461065	0	0	0
1	0	0.447922	0	0.67108	0.527914	0.519763	0	0.712236	0.118745
1	0	0.684223	0	0.646303	0.474767	0.496479	0	0	0.0815977
1	0	0.612376	0	0.708247	0.48427	0.521753	0	0	0
1	0	0.581697	0	0.612382	0.511813	0.474767	0	0	0
1	0	0.461065	0	0.67108	0.527914	0.527914	0	0.712236	0.11187
1	0	0.612382	0	0.612382	0.504055	0.481843	0	0.353697	0
1	0	0.67108	0	0.634594	0.481843	0.504055	0	0	0.0836681
1	0	0.697925	0	0.623297	0.519763	0.527914	0	0	0
1	0	0.441547	0	0.67108	0.519763	0.519763	0	0.712236	0.123411
1	0	0.581697	0	0.67108	0.461065	0.496479	0	0	0
1	0	0.67108	0	0.634594	0.489078	0.496479	0	0	0.0857519
1	0	0.684223	0	0.697925	0.481843	0.536277	0	0.383902	0.11187
1	0	0.612376	0	0.708247	0.491437	0.513912	0	0	0
1	0	0.581697	0	0.67108	0.467843	0.504055	0	0	0
1	0	0.581697	0	0.67108	0.467843	0.496479	0	0	0
1	0	0.67108	0	0.684223	0.489078	0.536277	0	0.383902	0.116437
1	0	0.612376	0	0.708247	0.491437	0.521753	0	0	0
1	0	0.612382	0	0.623297	0.504055	0.474767	0	0	0
1	0	0.581697	0	0.67108	0.461065	0.504055	0	0	0
1	0	0.581697	0	0.67108	0.467843	0.511813	0	0	0
1	0	0.67108	0	0.634594	0.474767	0.496479	0	0	0.0857519
1	0	0.67108	0	0.684223	0.489078	0.527914	0	0.383902	0.137829
1	0	0.591604	0	0.612382	0.511813	0.467843	0	0.358539	0
1	0	0.581697	0	0.612382	0.504055	0.474767	0	0	0
1	0	0.612376	0	0.708247	0.491437	0.513912	0	0	0
1	0	0.612376	0	0.708247	0.48427	0.521753	0	0	0
1	0	0.67108	0	0.634594	0.474767	0.496479	0	0	0.0920855
1	0	0.697925	0	0.623297	0.511813	0.519763	0	0	0
1	0	0.601825	0	0.623297	0.504055	0.467843	0	0	0
1	0	0.612376	0	0.708247	0.491437	0.513912	0	0	0
1	0	0.697925	0	0.623297	0.519763	0.519763	0	0	0
1	0	0.658453	0	0.658453	0.474767	0.511813	0	0	0.0899605
1	0	0.684223	0	0.697925	0.489078	0.527914	0	0.400138	0.114145
1	0	0.684223	0	0.634594	0.511813	0.511813	0	0	0
1	0	0.697925	0	0.623297	0.519763	0.504055	0	0	0
1	0	0.712236	0	0.634594	0.519763	0.519763	0	0	0
1	0	0.581697	0	0.684223	0.461065	0.504055	0	0	0
1	0	0.67108	0	0.646303	0.474767	0.504055	0	0	0.0920855
1	0	0.67108	0	0.646303	0.474767	0.504055	0	0	0.0836681
1	0	0.612382	0	0.623297	0.504055	0.467843	0	0.348928	0
1	0	0.581697	0	0.684223	0.461065	0.496479	0	0	0
1	0	0.684223	0	0.684223	0.489078	0.527914	0	0.383902	0.107367
1	0	0.581697	0	0.67108	0.467843	0.511813	0	0	0
1	0	0.581697	0	0.612382	0.504055	0.474767	0	0	0
1	0	0.612376	0	0.708247	0.491437	0.513912	0	0	0
1	0	0.612376	0	0.708247	0.491437	0.521753	0	0	0
1	0	0.612376	0	0.708247	0.491437	0.513912	0	0	0
1	0	0.612376	0	0.708247	0.491437	0.513912	0	0	0
1	0	0.454426	0	0.67108	0.536277	0.527914	0	0.712236	0.123411
1	0	0.684223	0	0.646303	0.474767	0.496479	0	0	0.0774963
1	0	0.612376	0	0.708247	0.491437	0.521753	0	0	0
1	0	0.461065	0	0.67108	0.536277	0.519763	0	0.712236	0.125769
1	0	0.467843	0	0.67108	0.527914	0.519763	0	0.712236	0.11187
1	0	0.581697	0	0.67108	0.461065	0.496479	0	0	0
1	0	0.67108	0	0.684223	0.489078	0.536277	0	0.394635	0.11187
1	0	0.684223	0	0.634594	0.519763	0.504055	0	0	0
1	0	0.461065	0	0.67108	0.527914	0.519763	0	0.697925	0.114145
1	0	0.612376	0	0.708247	0.491437	0.513912	0	0	0
1	0	0.581697	0	0.67108	0.467843	0.496479	0	0	0
1	0	0.67108	0	0.697925	0.489078	0.536277	0	0.389224	0.105139
1	0	0.581697	0	0.684223	0.461065	0.504055	0	0	0
1	0	0.581697	0	0.684223	0.461065	0.504055	0	0	0
1	0	0.684223	0	0.623297	0.481843	0.504055	0	0	0.0734466
1	0	0.67108	0	0.646303	0.474767	0.504055	0	0	0.0878493
1	0	0.454426	0	0.67108	0.536277	0.519763	0	0.712236	0.121069
1	0	0.612376	0	0.708247	0.491437	0.513912	0	0	0
1	0	0.601825	0	0.623297	0.504055	0.467843	0	0	0
1	0	0.581697	0	0.684223	0.461065	0.504055	0	0	0
1	0	0.581697	0	0.67108	0.461065	0.496479	0	0	0
1	0	0.581697	0	0.67108	0.461065	0.496479	0	0	0
1	0	0.67108	0	0.697925	0.489078	0.536277	0	0.400138	0.107367
1	0	0.684223	0	0.634594	0.474767	0.496479	0	0	0.0878493
1	0	0.612382	0	0.623297	0.504055	0.481843	0	0.348928	0
1	0	0.684223	0	0.634594	0.519763	0.504055	0	0	0
1	0	0.697925	0	0.634594	0.519763	0.511813	0	0	0
1	0	0.591604	0	0.67108	0.454426	0.504055	0	0	0
1	0	0.67108	0	0.634594	0.489078	0.496479	0	0	0.0878493
1	0	0.581697	0	0.67108	0.461065	0.489078	0	0	0
1	0	0.697925	0	0.612382	0.504055	0.504055	0	0	0
1	0	0.623297	0	0.623297	0.504055	0.474767	0	0.344228	0
1	0	0.658453	0	0.646303	0.481843	0.511813	0	0	0.0836681
1	0	0.454426	0	0.658453	0.519763	0.519763	0	0.712236	0.121069
1	0	0.684223	0	0.634594	0.519763	0.511813	0	0	0
1	0	0.67108	0	0.684223	0.496479	0.536277	0	0.383902	0.145287
1	0	0.697925	0	0.612382	0.519763	0.527914	0	0	0
1	0	0.684223	0	0.634594	0.474767	0.496479	0	0	0.0795405
1	0	0.612376	0	0.708247	0.491437	0.521753	0	0	0
1	0	0.612376	0	0.708247	0.491437	0.513912	0	0	0
1	0	0.581697	0	0.67108	0.467843	0.504055	0	0	0
1	0	0.67108	0	0.684223	0.481843	0.536277	0	0.394635	0.150358
1	0	0.67108	0	0.684223	0.489078	0.544863	0	0.394635	0.114145
1	0	0.461065	0	0.67108	0.536277	0.527914	0	0.712236	0.123411
1	0	0.684223	0	0.634594	0.511813	0.519763	0	0	0
1	0	0.454426	0	0.67108	0.519763	0.519763	0	0.712236	0.128145
1	0	0.612382	0	0.623297	0.504055	0.467843	0	0.321704	0
1	0	0.612382	0	0.623297	0.496479	0.474767	0	0	0
1	0	0.612382	0	0.623297	0.504055	0.467843	0	0.344228	0
1	0	0.67108	0	0.684223	0.489078	0.536277	0	0.378667	0.147813
1	0	0.712236	0	0.623297	0.511813	0.511813	0	0	0
1	0	0.684223	0	0.684223	0.481843	0.544863	0	0.400138	0.150358
1	0	0.684223	0	0.684223	0.489078	0.527914	0	0.394635	0.109611
1	0	0.454426	0	0.67108	0.519763	0.519763	0	0.712236	0.128145
1	0	0.447922	0	0.67108	0.527914	0.519763	0	0.712236	0.118745
1	0	0.67108	0	0.684223	0.489078	0.544863	0	0.378667	0.137829
1	0	0.581697	0	0.612382	0.504055	0.474767	0	0	0
1	0	0.447922	0	0.67108	0.527914	0.527914	0	0.712236	0.123411
1	0	0.684223	0	0.623297	0.467843	0.504055	0	0	0.0754651
1	0	0.612376	0	0.708247	0.48427	0.521753	0	0	0
1	0	0.67108	0	0.684223	0.489078	0.544863	0	0.383902	0.142782
1	0	0.684223	0	0.646303	0.474767	0.496479	0	0	0.0774963
1	0	0.697925	0	0.623297	0.527914	0.519763	0	0	0
1	0	0.684223	0	0.684223	0.489078	0.536277	0	0.389224	0.100729
1	0	0.67108	0	0.697925	0.489078	0.536277	0	0.389224	0.107367
1	0	0.612382	0	0.612382	0.504055	0.474767	0	0	0
1	0	0.684223	0	0.684223	0.489078	0.536277	0	0.383902	0.114145
1	0	0.461065	0	0.67108	0.536277	0.519763	0	0.697925	0.128145
1	0	0.581697	0	0.67108	0.461065	0.504055	0	0	0
1	0	0.581697	0	0.684223	0.467843	0.496479	0	0	0
1	0	0.67108	0	0.634594	0.489078	0.489078	0	0	0.0942247
1	0	0.658453	0	0.634594	0.489078	0.504055	0	0	0.0836681
1	0	0.612376	0	0.708247	0.48427	0.521753	0	0	0
1	0	0.581697	0	0.67108	0.474767	0.504055	0	0	0
1	0	0.581697	0	0.67108	0.461065	0.489078	0	0	0
1	0	0.591604	0	0.67108	0.454426	0.504055	0	0	0
1	0	0.658453	0	0.646303	0.474767	0.511813	0	0	0.0836681
1	0	0.612382	0	0.623297	0.504055	0.481843	0	0	0
1	0	0.67108	0	0.697925	0.489078	0.527914	0	0.389224	0.107367
1	0	0.67108	0	0.634594	0.481843	0.496479	0	0	0.0836681
1	0	0.581697	0	0.67108	0.461065	0.496479	0	0	0
1	0	0.454426	0	0.67108	0.536277	0.527914	0	0.697925	0.118745
1	0	0.684223	0	0.684223	0.489078	0.519763	0	0.394635	0.107367
1	0	0.612376	0	0.708247	0.491437	0.521753	0	0	0
1	0	0.612382	0	0.623297	0.504055	0.467843	0	0.330526	0
1	0	0.612382	0	0.623297	0.504055	0.461065	0	0	0
1	0	0.684223	0	0.684223	0.489078	0.536277	0	0.389224	0.155509
1	0	0.684223	0	0.623297	0.481843	0.511813	0	0	0.0774963
1	0	0.712236	0	0.623297	0.519763	0.511813	0	0	0
1	0	0.684223	0	0.697925	0.489078	0.536277	0	0.389224	0.107367
1	0	0.461065	0	0.67108	0.536277	0.519763	0	0.697925	0.128145
1	0	0.581697	0	0.684223	0.461065	0.504055	0	0	0
1	0	0.67108	0	0.658453	0.474767	0.504055	0	0	0.0878493
1	0	0.684223	0	0.634594	0.474767	0.511813	0	0	0.0774963
1	0	0.684223	0	0.623297	0.474767	0.504055	0	0	0.0815977
1	0	0.67108	0	0.646303	0.474767	0.504055	0	0	0.0899605
1	0	0.454426	0	0.67108	0.527914	0.519763	0	0.712236	0.121069
1	0	0.697925	0	0.634594	0.519763	0.504055	0	0	0
1	0	0.581697	0	0.612382	0.504055	0.474767	0	0	0
1	0	0.684223	0	0.634594	0.474767	0.496479	0	0	0.0836681
1	0	0.684223	0	0.623297	0.481843	0.504055	0	0	0.0774963
1	0	0.623297	0	0.612382	0.504055	0.481843	0	0	0
1	0	0.591604	0	0.612382	0.504055	0.461065	0	0.335028	0
1	0	0.67108	0	0.646303	0.474767	0.511813	0	0	0.0942247
1	0	0.684223	0	0.634594	0.474767	0.519763	0	0	0.0815977
1	0	0.612376	0	0.708247	0.48427	0.521753	0	0	0
1	0	0.447922	0	0.67108	0.519763	0.511813	0	0.712236	0.118745
1	0	0.697925	0	0.634594	0.467843	0.504055	0	0	0.0734466
1	0	0.447922	0	0.67108	0.519763	0.519763	0	0.712236	0.121069
1	0	0.454426	0	0.67108	0.527914	0.519763	0	0.712236	0.118745
1	0	0.67108	0	0.634594	0.489078	0.496479	0	0	0.0815977
1	0	0.697925	0	0.623297	0.519763	0.511813	0	0	0
1	0	0.684223	0	0.684223	0.489078	0.544863	0	0.383902	0.105139
1	0	0.581697	0	0.67108	0.467843	0.511813	0	0	0
1	0	0.67108	0	0.684223	0.489078	0.536277	0	0.378667	0.150358
1	0	0.612376	0	0.708247	0.491437	0.521753	0	0	0
1	0	0.697925	0	0.612382	0.511813	0.511813	0	0	0
1	0	0.581697	0	0.684223	0.461065	0.496479	0	0	0
1	0	0.612382	0	0.623297	0.504055	0.467843	0	0	0
1	0	0.612382	0	0.623297	0.504055	0.467843	0	0.344228	0
1	0	0.441547	0	0.67108	0.519763	0.511813	0	0.712236	0.121069
1	0	0.612376	0	0.708247	0.491437	0.513912	0	0	0
1	0	0.581697	0	0.67108	0.467843	0.511813	0	0	0
1	0	0.612382	0	0.623297	0.511813	0.467843	0	0.358539	0
1	0	0.581697	0	0.612382	0.504055	0.467843	0	0	0
1	0	0.591604	0	0.612382	0.511813	0.467843	0	0	0
1	0	0.684223	0	0.684223	0.474767	0.544863	0	0.389224	0.125769
1	0	0.684223	0	0.623297	0.467843	0.504055	0	0	0.0714407
1	0	0.684223	0	0.623297	0.527914	0.504055	0	0	0
1	0	0.581697	0	0.684223	0.467843	0.496479	0	0	0
1	0	0.461065	0	0.67108	0.527914	0.519763	0	0.697925	0.118745
1	0	0.684223	0	0.684223	0.489078	0.536277	0	0.394635	0.155509
1	0	0.591604	0	0.623297	0.511813	0.467843	0	0	0
1	0	0.697925	0	0.634594	0.474767	0.504055	0	0	0.0815977
1	0	0.623297	0	0.612382	0.504055	0.474767	0	0	0
1	0	0.67108	0	0.634594	0.474767	0.496479	0	0	0.0899605
1	0	0.697925	0	0.634594	0.481843	0.504055	0	0	0.0774963
1	0	0.581697	0	0.612382	0.504055	0.474767	0	0	0
1	0	0.461065	0	0.67108	0.527914	0.519763	0	0.697925	0.118745
1	0	0.612382	0	0.623297	0.519763	0.481843	0	0.353697	0
1	0	0.581697	0	0.684223	0.461065	0.504055	0	0	0
1	0	0.454426	0	0.67108	0.527914	0.519763	0	0.712236	0.121069
1	0	0.72243	0	0.633884	0.529784	0.521753	0	0	0
1	0	0.601825	0	0.612382	0.496479	0.474767	0	0.335028	0
1	0	0.612376	0	0.708247	0.491437	0.521753	0	0	0
1	0	0.712236	0	0.623297	0.519763	0.511813	0	0	0
1	0	0.581697	0	0.67108	0.467843	0.511813	0	0	0
1	0	0.697925	0	0.623297	0.519763	0.496479	0	0	0
1	0	0.72243	0	0.645182	0.521753	0.538013	0	0	0
1	0	0.447922	0	0.67108	0.519763	0.519763	0	0.712236	0.118745
1	0	0.612376	0	0.708247	0.48427	0.521753	0	0	0
1	0	0.612382	0	0.623297	0.504055	0.481843	0	0	0
1	0	0.581697	0	0.612382	0.504055	0.474767	0	0	0
1	0	0.684223	0	0.697925	0.489078	0.527914	0	0.400138	0.114145
1	0	0.581697	0	0.67108	0.467843	0.511813	0	0	0
1	0	0.447922	0	0.67108	0.527914	0.519763	0	0.712236	0.123411
1	0	0.612376	0	0.708247	0.48427	0.521753	0	0	0
1	0	0.684223	0	0.623297	0.511813	0.511813	0	0	0
1	0	0.684223	0	0.634594	0.481843	0.496479	0	0	0.0795405
1	0	0.67108	0	0.634594	0.489078	0.496479	0	0	0.0878493
1	0	0.697925	0	0.623297	0.461065	0.496479	0	0	0.0857519
1	0	0.467843	0	0.67108	0.527914	0.519763	0	0.697925	0.11187
1	0	0.684223	0	0.697925	0.489078	0.536277	0	0.383902	0.114145
1	0	0.591604	0	0.67108	0.461065	0.504055	0	0	0
1	0	0.612376	0	0.708247	0.491437	0.521753	0	0	0
1	0	0.67108	0	0.684223	0.481843	0.536277	0	0.383902	0.145287
1	0	0.461065	0	0.67108	0.519763	0.511813	0	0.712236	0.121069
1	0	0.623297	0	0.612382	0.504055	0.481843	0	0	0
1	0	0.623297	0	0.623297	0.504055	0.474767	0	0.348928	0
1	0	0.612382	0	0.623297	0.504055	0.474767	0	0	0
1	0	0.684223	0	0.697925	0.496479	0.536277	0	0.383902	0.105139
1	0	0.67108	0	0.684223	0.489078	0.536277	0	0.389224	0.150358
1	0	0.697925	0	0.623297	0.504055	0.519763	0	0	0
1	0	0.612382	0	0.623297	0.519763	0.474767	0	0.344228	0
1	0	0.684223	0	0.684223	0.481843	0.536277	0	0.389224	0.109611
1	0	0.684223	0	0.646303	0.474767	0.496479	0	0	0.0795405
1	0	0.712236	0	0.634594	0.504055	0.511813	0	0	0
1	0	0.67108	0	0.634594	0.481843	0.489078	0	0	0.0899605
1	0	0.612376	0	0.708247	0.48427	0.521753	0	0	0
1	0	0.67108	0	0.697925	0.489078	0.536277	0	0.400138	0.107367
1	0	0.67108	0	0.684223	0.489078	0.544863	0	0.378667	0.130539
1	0	0.447922	0	0.67108	0.519763	0.511813	0	0.712236	0.118745
1	0	0.684223	0	0.623297	0.519763	0.511813	0	0	0
1	0	0.612376	0	0.708247	0.491437	0.521753	0	0	0
1	0	0.454426	0	0.658453	0.519763	0.527914	0	0.712236	0.130539
1	0	0.612376	0	0.708247	0.491437	0.513912	0	0	0
1	0	0.684223	0	0.623297	0.474767	0.504055	0	0	0.0815977
1	0	0.581697	0	0.67108	0.461065	0.496479	0	0	0
1	0	0.612376	0	0.708247	0.491437	0.513912	0	0	0
1	0	0.67108	0	0.697925	0.496479	0.527914	0	0.405738	0.121069
1	0	0.697925	0	0.634594	0.519763	0.496479	0	0	0
1	0	0.454426	0	0.67108	0.527914	0.519763	0	0.712236	0.123411
1	0	0.684223	0	0.697925	0.489078	0.527914	0	0.400138	0.121069
1	0	0.697925	0	0.634594	0.511813	0.511813	0	0	0
1	0	0.697925	0	0.623297	0.474767	0.504055	0	0	0.0714407
1	0	0.67108	0	0.634594	0.474767	0.496479	0	0	0.0899605
1	0	0.454426	0	0.67108	0.536277	0.527914	0	0.712236	0.123411
1	0	0.684223	0	0.684223	0.481843	0.544863	0	0.394635	0.147813
1	0	0.612376	0	0.708247	0.491437	0.521753	0	0	0
1	0	0.684223	0	0.634594	0.481843	0.496479	0	0	0.0836681
1	0	0.581697	0	0.67108	0.461065	0.504055	0	0	0
1	0	0.581697	0	0.67108	0.461065	0.496479	0	0	0
1	0	0.601825	0	0.623297	0.496479	0.467843	0	0	0
1	0	0.708247	0	0.656876	0.529784	0.538013	0	0	0
1	0	0.581697	0	0.67108	0.467843	0.504055	0	0	0
1	0	0.581697	0	0.684223	0.461065	0.496479	0	0	0
1	0	0.581697	0	0.684223	0.467843	0.489078	0	0	0
1	0	0.67108	0	0.684223	0.481843	0.536277	0	0.389224	0.145287
1	0	0.684223	0	0.623297	0.467843	0.504055	0	0	0.0714407
1	0	0.684223	0	0.634594	0.519763	0.504055	0	0	0
1	0	0.67108	0	0.646303	0.467843	0.504055	0	0	0.0920855
1	0	0.684223	0	0.623297	0.467843	0.504055	0	0	0.0734466
1	0	0.581697	0	0.684223	0.467843	0.489078	0	0	0
1	0	0.697925	0	0.623297	0.527914	0.519763	0	0	0
1	0	0.461065	0	0.67108	0.536277	0.527914	0	0.697925	0.123411
1	0	0.684223	0	0.684223	0.481843	0.527914	0	0.394635	0.109611
1	0	0.612376	0	0.708247	0.491437	0.521753	0	0	0
1	0	0.67108	0	0.684223	0.481843	0.536277	0	0.373516	0.145287
1	0	0.697925	0	0.623297	0.504055	0.511813	0	0	0
1	0	0.67108	0	0.634594	0.489078	0.496479	0	0	0.0899605
1	0	0.612376	0	0.708247	0.491437	0.521753	0	0	0
1	0	0.697925	0	0.623297	0.519763	0.496479	0	0	0
1	0	0.67108	0	0.684223	0.489078	0.544863	0	0.383902	0.114145
1	0	0.581697	0	0.612382	0.504055	0.467843	0	0	0
1	0	0.67108	0	0.684223	0.489078	0.544863	0	0.378667	0.142782
1	0	0.708247	0	0.656876	0.491437	0.513912	0	0	0.0975331
1	0	0.461065	0	0.67108	0.527914	0.527914	0	0.697925	0.118745
1	0	0.581697	0	0.67108	0.461065	0.496479	0	0	0
1	0	0.684223	0	0.684223	0.481843	0.519763	0	0.383902	0.121069
1	0	0.67108	0	0.684223	0.496479	0.527914	0	0.389224	0.142782
1	0	0.612376	0	0.708247	0.491437	0.513912	0	0	0
1	0	0.591604	0	0.612382	0.511813	0.467843	0	0	0
1	0	0.658453	0	0.658453	0.474767	0.511813	0	0	0.0836681
1	0	0.581697	0	0.612382	0.511813	0.474767	0	0	0
1	0	0.591604	0	0.612382	0.511813	0.474767	0	0	0
1	0	0.67108	0	0.684223	0.489078	0.536277	0	0.389224	0.125769
1	0	0.712236	0	0.623297	0.496479	0.504055	0	0	0
1	0	0.612376	0	0.708247	0.491437	0.521753	0	0	0
1	0	0.612382	0	0.623297	0.504055	0.481843	0	0.353697	0
1	0	0.684223	0	0.684223	0.489078	0.536277	0	0.378667	0.105139
1	0	0.461065	0	0.67108	0.527914	0.527914	0	0.712236	0.116437
1	0	0.67108	0	0.684223	0.489078	0.527914	0	0.383902	0.137829
1	0	0.684223	0	0.623297	0.481843	0.511813	0	0	0.0754651
1	0	0.67108	0	0.634594	0.489078	0.496479	0	0	0.0815977
1	0	0.67108	0	0.684223	0.496479	0.536277	0	0.383902	0.145287
1	0	0.612382	0	0.623297	0.511813	0.474767	0	0.348928	0
1	0	0.454426	0	0.67108	0.527914	0.519763	0	0.712236	0.116437
1	0	0.461065	0	0.67108	0.527914	0.527914	0	0.712236	0.11187
1	0	0.697925	0	0.623297	0.527914	0.519763	0	0	0
1	0	0.72243	0	0.645182	0.529784	0.521753	0	0	0
1	0	0.708247	0	0.645182	0.538013	0.521753	0	0	0
1	0	0.447922	0	0.67108	0.519763	0.519763	0	0.712236	0.121069
1	0	0.612382	0	0.623297	0.511813	0.474767	0	0.348928	0
1	0	0.454426	0	0.67108	0.519763	0.511813	0	0.712236	0.123411
1	0	0.612376	0	0.708247	0.491437	0.513912	0	0	0
1	0	0.454426	0	0.67108	0.527914	0.519763	0	0.712236	0.121069
1	0	0.684223	0	0.684223	0.489078	0.527914	0	0.383902	0.105139
1	0	0.612376	0	0.708247	0.491437	0.513912	0	0	0
1	0	0.612376	0	0.708247	0.491437	0.521753	0	0	0
1	0	0.697925	0	0.634594	0.527914	0.519763	0	0	0
1	0	0.684223	0	0.623297	0.474767	0.504055	0	0	0.0754651
1	0	0.612376	0	0.708247	0.491437	0.521753	0	0	0
1	0	0.581697	0	0.684223	0.461065	0.496479	0	0	0
1	0	0.708247	0	0.633884	0.538013	0.521753	0	0	0
1	0	0.67108	0	0.684223	0.496479	0.536277	0	0.389224	0.150358
1	0	0.67108	0	0.684223	0.474767	0.536277	0	0.383902	0.140296
1	0	0.712236	0	0.623297	0.504055	0.511813	0	0	0
1	0	0.581697	0	0.612382	0.504055	0.474767	0	0	0
1	0	0.67108	0	0.634594	0.489078	0.496479	0	0	0.0857519
1	0	0.684223	0	0.612382	0.519763	0.504055	0	0	0
1	0	0.581697	0	0.612382	0.504055	0.474767	0	0	0
1	0	0.697925	0	0.634594	0.511813	0.511813	0	0	0
1	0	0.712236	0	0.623297	0.511813	0.519763	0	0	0
1	0	0.712236	0	0.623297	0.504055	0.504055	0	0	0
1	0	0.67108	0	0.634594	0.474767	0.496479	0	0	0.0836681
1	0	0.67108	0	0.634594	0.481843	0.496479	0	0	0.0815977
1	0	0.67108	0	0.684223	0.489078	0.536277	0	0.394635	0.147813
1	0	0.581697	0	0.67108	0.467843	0.511813	0	0	0
1	0	0.697925	0	0.623297	0.474767	0.496479	0	0	0.0795405
1	0	0.67108	0	0.646303	0.481843	0.504055	0	0	0.0899605
1	0	0.612376	0	0.708247	0.491437	0.513912	0	0	0
1	0	0.581697	0	0.67108	0.461065	0.496479	0	0	0
1	0	0.461065	0	0.67108	0.519763	0.511813	0	0.712236	0.123411
1	0	0.612382	0	0.623297	0.504055	0.461065	0	0.335028	0
1	0	0.591604	0	0.612382	0.504055	0.461065	0	0	0
1	0	0.447922	0	0.67108	0.519763	0.511813	0	0.712236	0.118745
1	0	0.447922	0	0.67108	0.527914	0.519763	0	0.712236	0.121069
1	0	0.712236	0	0.623297	0.511813	0.511813	0	0	0
1	0	0.454426	0	0.658453	0.519763	0.519763	0	0.712236	0.128145
1	0	0.612376	0	0.708247	0.491437	0.513912	0	0	0
1	0	0.581697	0	0.612382	0.504055	0.474767	0	0	0
1	0	0.684223	0	0.697925	0.496479	0.527914	0	0.400138	0.121069
1	0	0.612376	0	0.708247	0.491437	0.513912	0	0	0
1	0	0.467843	0	0.67108	0.527914	0.519763	0	0.712236	0.109611
1	0	0.697925	0	0.634594	0.519763	0.511813	0	0	0
1	0	0.708247	0	0.645182	0.521753	0.529784	0	0	0
1	0	0.581697	0	0.684223	0.461065	0.496479	0	0	0
1	0	0.67108	0	0.684223	0.489078	0.544863	0	0.383902	0.147813
1	0	0.612376	0	0.708247	0.491437	0.513912	0	0	0
1	0	0.581697	0	0.67108	0.467843	0.511813	0	0	0
1	0	0.67108	0	0.658453	0.474767	0.504055	0	0	0.0878493
1	0	0.684223	0	0.697925	0.489078	0.536277	0	0.383902	0.105139
1	0	0.591604	0	0.67108	0.461065	0.504055	0	0	0
1	0	0.591604	0	0.612382	0.504055	0.467843	0	0	0
1	0	0.658453	0	0.646303	0.474767	0.504055	0	0	0.0878493
1	0	0.697925	0	0.634594	0.527914	0.511813	0	0	0
1	0	0.581697	0	0.67108	0.461065	0.496479	0	0	0
1	0	0.454426	0	0.67108	0.536277	0.511813	0	0.697925	0.121069
1	0	0.697925	0	0.623297	0.467843	0.496479	0	0	0.0714407
1	0	0.461065	0	0.67108	0.527914	0.527914	0	0.712236	0.116437
1	0	0.684223	0	0.684223	0.489078	0.527914	0	0.394635	0.105139
1	0	0.581697	0	0.612382	0.511813	0.474767	0	0	0
1	0	0.684223	0	0.684223	0.481843	0.536277	0	0.394635	0.137829
1	0	0.454426	0	0.67108	0.519763	0.519763	0	0.712236	0.128145
1	0	0.697925	0	0.623297	0.474767	0.504055	0	0	0.0714407
1	0	0.67108	0	0.684223	0.481843	0.536277	0	0.389224	0.142782
1	0	0.612376	0	0.708247	0.491437	0.521753	0	0	0
1	0	0.612376	0	0.708247	0.491437	0.513912	0	0	0
1	0	0.697925	0	0.646303	0.511813	0.511813	0	0	0
1	0	0.72243	0	0.633884	0.529784	0.521753	0	0	0
1	0	0.67108	0	0.634594	0.481843	0.496479	0	0	0.0878493
1	0	0.72243	0	0.645182	0.521753	0.529784	0	0	0
1	0	0.697925	0	0.623297	0.511813	0.511813	0	0	0
1	0	0.601825	0	0.623297	0.511813	0.474767	0	0	0
1	0	0.591604	0	0.623297	0.519763	0.474767	0	0	0
1	0	0.697925	0	0.634594	0.519763	0.504055	0	0	0
1	0	0.67108	0	0.634594	0.481843	0.496479	0	0	0.0857519
1	0	0.581697	0	0.67108	0.467843	0.504055	0	0	0
1	0	0.581697	0	0.67108	0.454426	0.504055	0	0	0
1	0	0.467843	0	0.67108	0.527914	0.519763	0	0.712236	0.109611
1	0	0.712236	0	0.623297	0.504055	0.519763	0	0	0
1	0	0.712236	0	0.623297	0.504055	0.496479	0	0	0
1	0	0.454426	0	0.658453	0.519763	0.527914	0	0.712236	0.128145
1	0	0.684223	0	0.684223	0.496479	0.544863	0	0.389224	0.158116
1	0	0.612376	0	0.708247	0.48427	0.521753	0	0	0
1	0	0.684223	0	0.646303	0.474767	0.496479	0	0	0.0795405
1	0	0.467843	0	0.67108	0.527914	0.519763	0	0.697925	0.11187
1	0	0.581697	0	0.684223	0.467843	0.496479	0	0	0
1	0	0.581697	0	0.67108	0.467843	0.504055	0	0	0
1	0	0.454426	0	0.67108	0.519763	0.511813	0	0.712236	0.118745
1	0	0.581697	0	0.67108	0.467843	0.511813	0	0	0
1	0	0.684223	0	0.634594	0.474767	0.504055	0	0	0.0857519
1	0	0.581697	0	0.67108	0.461065	0.496479	0	0	0
1	0	0.697925	0	0.623297	0.519763	0.519763	0	0	0
1	0	0.581697	0	0.67108	0.461065	0.496479	0	0	0
1	0	0.612376	0	0.708247	0.491437	0.521753	0	0	0
1	0	0.581697	0	0.67108	0.461065	0.496479	0	0	0
1	0	0.581697	0	0.67108	0.467843	0.511813	0	0	0
1	0	0.612376	0	0.708247	0.48427	0.521753	0	0	0
1	0	0.623297	0	0.612382	0.504055	0.467843	0	0	0
1	0	0.684223	0	0.634594	0.511813	0.511813	0	0	0
1	0	0.581697	0	0.67108	0.467843	0.511813	0	0	0
1	0	0.697925	0	0.623297	0.474767	0.504055	0	0	0.0774963
1	0	0.591604	0	0.67108	0.461065	0.504055	0	0	0
1	0	0.581697	0	0.67108	0.467843	0.504055	0	0	0
1	0	0.712236	0	0.634594	0.511813	0.519763	0	0	0
1	0	0.612376	0	0.708247	0.491437	0.513912	0	0	0
1	0	0.612382	0	0.623297	0.504055	0.474767	0	0	0
1	0	0.67108	0	0.684223	0.489078	0.536277	0	0.389224	0.152923
1	0	0.623297	0	0.612382	0.504055	0.474767	0	0	0
1	0	0.612376	0	0.708247	0.491437	0.513912	0	0	0
1	0	0.581697	0	0.623297	0.519763	0.467843	0	0	0
1	0	0.612376	0	0.708247	0.491437	0.521753	0	0	0
1	0	0.461065	0	0.67108	0.527914	0.519763	0	0.712236	0.114145
1	0	0.612382	0	0.623297	0.504055	0.481843	0	0	0
1	0	0.612382	0	0.612382	0.504055	0.481843	0	0	0
1	0	0.612376	0	0.708247	0.491437	0.513912	0	0	0
1	0	0.67108	0	0.646303	0.474767	0.496479	0	0	0.0857519
1	0	0.697925	0	0.623297	0.519763	0.511813	0	0	0
1	0	0.581697	0	0.684223	0.467843	0.489078	0	0	0
1	0	0.684223	0	0.684223	0.489078	0.544863	0	0.383902	0.105139
1	0	0.461065	0	0.658453	0.519763	0.511813	0	0.712236	0.123411
1	0	0.67108	0	0.684223	0.489078	0.527914	0	0.383902	0.11187
1	0	0.601825	0	0.623297	0.504055	0.474767	0	0.326085	0
1	0	0.697925	0	0.623297	0.511813	0.511813	0	0	0
1	0	0.684223	0	0.623297	0.474767	0.511813	0	0	0.0714407
1	0	0.684223	0	0.623297	0.467843	0.504055	0	0	0.0754651
1	0	0.441547	0	0.67108	0.519763	0.511813	0	0.712236	0.123411
1	0	0.67108	0	0.684223	0.489078	0.536277	0	0.394635	0.152923
1	0	0.612382	0	0.623297	0.504055	0.467843	0	0	0
1	0	0.581697	0	0.684223	0.467843	0.496479	0	0	0
1	0	0.581697	0	0.612382	0.511813	0.474767	0	0	0
1	0	0.601825	0	0.623297	0.511813	0.467843	0	0	0
1	0	0.612376	0	0.708247	0.491437	0.521753	0	0	0
1	0	0.581697	0	0.684223	0.467843	0.489078	0	0	0
1	0	0.591604	0	0.612382	0.504055	0.461065	0	0	0
1	0	0.581697	0	0.67108	0.467843	0.504055	0	0	0
1	0	0.454426	0	0.67108	0.519763	0.511813	0	0.712236	0.121069
1	0	0.581697	0	0.67108	0.461065	0.496479	0	0	0
1	0	0.612376	0	0.708247	0.491437	0.513912	0	0	0
1	0	0.581697	0	0.67108	0.467843	0.504055	0	0	0
1	0	0.581697	0	0.67108	0.461065	0.496479	0	0	0
1	0	0.697925	0	0.634594	0.511813	0.511813	0	0	0
1	0	0.684223	0	0.623297	0.511813	0.511813	0	0	0
1	0	0.612382	0	0.623297	0.504055	0.467843	0	0	0
1	0	0.697925	0	0.634594	0.511813	0.519763	0	0	0
1	0	0.697925	0	0.612382	0.519763	0.519763	0	0	0
1	0	0.591604	0	0.612382	0.504055	0.467843	0	0	0
1	0	0.612382	0	0.623297	0.511813	0.474767	0	0	0
1	0	0.712236	0	0.623297	0.504055	0.504055	0	0	0
1	0	0.454426	0	0.67108	0.519763	0.511813	0	0.712236	0.118745
1	0	0.612376	0	0.708247	0.491437	0.521753	0	0	0
1	0	0.612376	0	0.708247	0.491437	0.521753	0	0	0
1	0	0.684223	0	0.634594	0.481843	0.496479	0	0	0.0836681
1	0	0.684223	0	0.634594	0.481843	0.504055	0	0	0.0857519
1	0	0.612376	0	0.708247	0.491437	0.521753	0	0	0
1	0	0.684223	0	0.623297	0.504055	0.511813	0	0	0
1	0	0.454426	0	0.658453	0.519763	0.527914	0	0.712236	0.130539
1	0	0.684223	0	0.634594	0.467843	0.496479	0	0	0.0878493
1	0	0.581697	0	0.684223	0.467843	0.496479	0	0	0
1	0	0.612376	0	0.708247	0.491437	0.521753	0	0	0
1	0	0.67108	0	0.634594	0.489078	0.496479	0	0	0.0878493
1	0	0.684223	0	0.684223	0.489078	0.519763	0	0.400138	0.114145
1	0	0.601825	0	0.623297	0.511813	0.467843	0	0	0
1	0	0.612376	0	0.708247	0.48427	0.521753	0	0	0
1	0	0.684223	0	0.634594	0.474767	0.496479	0	0	0.0815977
1	0	0.684223	0	0.634594	0.474767	0.496479	0	0	0.0878493
1	0	0.684223	0	0.623297	0.511813	0.511813	0	0	0
1	0	0.591604	0	0.623297	0.511813	0.474767	0	0	0
1	0	0.67108	0	0.684223	0.489078	0.544863	0	0.389224	0.137829
1	0	0.612376	0	0.708247	0.491437	0.513912	0	0	0
1	0	0.697925	0	0.634594	0.511813	0.511813	0	0	0
1	0	0.612376	0	0.708247	0.491437	0.513912	0	0	0
1	0	0.454426	0	0.67108	0.527914	0.519763	0	0.712236	0.121069
1	0	0.712236	0	0.634594	0.504055	0.511813	0	0	0
1	0	0.454426	0	0.67108	0.536277	0.519763	0	0.712236	0.121069
1	0	0.697925	0	0.623297	0.519763	0.496479	0	0	0
1	0	0.581697	0	0.67108	0.461065	0.504055	0	0	0
1	0	0.581697	0	0.67108	0.467843	0.511813	0	0	0
1	0	0.67108	0	0.646303	0.481843	0.496479	0	0	0.0857519
1	0	0.67108	0	0.684223	0.489078	0.536277	0	0.389224	0.155509
1	0	0.581697	0	0.684223	0.461065	0.504055	0	0	0
1	0	0.67108	0	0.646303	0.467843	0.504055	0	0	0.0815977
1	0	0.623297	0	0.612382	0.504055	0.481843	0	0.358539	0
1	0	0.684223	0	0.684223	0.474767	0.536277	0	0.389224	0.132951
1	0	0.72243	0	0.656876	0.529784	0.521753	0	0	0
1	0	0.684223	0	0.634594	0.481843	0.504055	0	0	0.0754651
1	0	0.684223	0	0.646303	0.474767	0.496479	0	0	0.0857519
1	0	0.697925	0	0.623297	0.504055	0.519763	0	0	0
1	0	0.612376	0	0.708247	0.491437	0.513912	0	0	0
1	0	0.612376	0	0.708247	0.491437	0.521753	0	0	0
1	0	0.67108	0	0.684223	0.481843	0.536277	0	0.394635	0.150358
1	0	0.684223	0	0.684223	0.489078	0.527914	0	0.394635	0.11187
1	0	0.454426	0	0.67108	0.527914	0.519763	0	0.712236	0.123411
1	0	0.447922	0	0.67108	0.519763	0.519763	0	0.712236	0.123411
1	0	0.67108	0	0.684223	0.481843	0.536277	0	0.394635	0.150358
1	0	0.581697	0	0.684223	0.467843	0.489078	0	0	0
1	0	0.684223	0	0.634594	0.481843	0.496479	0	0	0.0836681
1	0	0.697925	0	0.623297	0.527914	0.489078	0	0	0
1	0	0.581697	0	0.684223	0.461065	0.496479	0	0	0
1	0	0.581697	0	0.684223	0.467843	0.496479	0	0	0
1	0	0.612376	0	0.708247	0.491437	0.521753	0	0	0
1	0	0.612376	0	0.708247	0.491437	0.513912	0	0	0
1	0	0.684223	0	0.623297	0.467843	0.504055	0	0	0.0714407
1	0	0.454426	0	0.67108	0.536277	0.519763	0	0.697925	0.128145
1	0	0.581697	0	0.684223	0.467843	0.496479	0	0	0
1	0	0.684223	0	0.634594	0.474767	0.504055	0	0	0.0857519
1	0	0.708247	0	0.656876	0.529784	0.529784	0	0	0
1	0	0.612382	0	0.612382	0.504055	0.481843	0	0	0
1	0	0.712236	0	0.623297	0.519763	0.511813	0	0	0
1	0	0.461065	0	0.67108	0.536277	0.527914	0	0.712236	0.123411
1	0	0.601825	0	0.623297	0.511813	0.474767	0	0	0
1	0	0.684223	0	0.684223	0.481843	0.544863	0	0.400138	0.150358
1	0	0.67108	0	0.684223	0.489078	0.536277	0	0.389224	0.132951
1	0	0.581697	0	0.67108	0.467843	0.504055	0	0	0
1	0	0.697925	0	0.623297	0.511813	0.511813	0	0	0
1	0	0.591604	0	0.623297	0.511813	0.474767	0	0	0
1	0	0.684223	0	0.684223	0.496479	0.544863	0	0.389224	0.155509
1	0	0.461065	0	0.67108	0.536277	0.527914	0	0.712236	0.121069
1	0	0.612376	0	0.708247	0.491437	0.513912	0	0	0
1	0	0.67108	0	0.684223	0.489078	0.536277	0	0.394635	0.152923
1	0	0.697925	0	0.623297	0.474767	0.504055	0	0	0.0815977
1	0	0.591604	0	0.612382	0.511813	0.474767	0	0	0
1	0	0.623297	0	0.612382	0.504055	0.467843	0	0.368446	0
1	0	0.612376	0	0.708247	0.491437	0.521753	0	0	0
1	0	0.447922	0	0.67108	0.519763	0.519763	0	0.712236	0.118745
1	0	0.684223	0	0.684223	0.481843	0.527914	0	0.389224	0.107367
1	0	0.67108	0	0.697925	0.489078	0.536277	0	0.389224	0.107367
1	0	0.712236	0	0.612382	0.527914	0.511813	0	0	0
1	0	0.697925	0	0.623297	0.467843	0.496479	0	0	0.0714407
1	0	0.697925	0	0.623297	0.511813	0.519763	0	0	0
1	0	0.697925	0	0.623297	0.467843	0.496479	0	0	0.0734466
1	0	0.612376	0	0.708247	0.491437	0.521753	0	0	0
1	0	0.581697	0	0.67108	0.467843	0.504055	0	0	0
1	0	0.612376	0	0.708247	0.491437	0.513912	0	0	0
1	0	0.697925	0	0.623297	0.504055	0.511813	0	0	0
1	0	0.712236	0	0.623297	0.504055	0.511813	0	0	0
1	0	0.67108	0	0.684223	0.489078	0.544863	0	0.389224	0.132951
1	0	0.581697	0	0.67108	0.467843	0.504055	0	0	0
1	0	0.612382	0	0.623297	0.504055	0.481843	0	0.348928	0
1	0	0.697925	0	0.634594	0.511813	0.511813	0	0	0
1	0	0.67108	0	0.684223	0.489078	0.536277	0	0.394635	0.150358
1	0	0.454426	0	0.67108	0.527914	0.519763	0	0.697925	0.118745
1	0	0.684223	0	0.684223	0.481843	0.527914	0	0.389224	0.107367
1	0	0.67108	0	0.684223	0.489078	0.527914	0	0.389224	0.145287
1	0	0.684223	0	0.684223	0.481843	0.536277	0	0.389224	0.11187
1	0	0.67108	0	0.684223	0.496479	0.536277	0	0.383902	0.145287
1	0	0.67108	0	0.646303	0.474767	0.496479	0	0	0.0985463
1	0	0.623297	0	0.612382	0.511813	0.474767	0	0	0
1	0	0.591604	0	0.623297	0.511813	0.467843	0	0	0
1	0	0.612376	0	0.708247	0.48427	0.521753	0	0	0
1	0	0.684223	0	0.646303	0.474767	0.496479	0	0	0.0836681
1	0	0.697925	0	0.623297	0.511813	0.519763	0	0	0
1	0	0.623297	0	0.612382	0.504055	0.474767	0	0	0
1	0	0.581697	0	0.684223	0.467843	0.496479	0	0	0
1	0	0.67108	0	0.684223	0.481843	0.536277	0	0.389224	0.142782
1	0	0.67108	0	0.684223	0.489078	0.544863	0	0.378667	0.130539
1	0	0.581697	0	0.684223	0.461065	0.504055	0	0	0
1	0	0.67108	0	0.684223	0.481843	0.536277	0	0.378667	0.130539
1	0	0.447922	0	0.67108	0.527914	0.527914	0	0.712236	0.123411
1	0	0.612376	0	0.708247	0.491437	0.513912	0	0	0
1	0	0.67108	0	0.697925	0.489078	0.536277	0	0.400138	0.105139
1	0	0.612382	0	0.623297	0.504055	0.467843	0	0.353697	0
1	0	0.601825	0	0.623297	0.519763	0.467843	0	0	0
1	0	0.697925	0	0.623297	0.527914	0.511813	0	0	0
1	0	0.447922	0	0.67108	0.527914	0.519763	0	0.712236	0.118745
1	0	0.612382	0	0.623297	0.504055	0.481843	0	0.373516	0
1	0	0.612376	0	0.708247	0.491437	0.513912	0	0	0
1	0	0.697925	0	0.612382	0.504055	0.519763	0	0	0
1	0	0.684223	0	0.697925	0.489078	0.527914	0	0.394635	0.114145
1	0	0.684223	0	0.646303	0.474767	0.496479	0	0	0.0754651
1	0	0.658453	0	0.646303	0.481843	0.511813	0	0	0.0920855
1	0	0.612376	0	0.708247	0.491437	0.521753	0	0	0
1	0	0.581697	0	0.67108	0.461065	0.496479	0	0	0
1	0	0.684223	0	0.646303	0.474767	0.496479	0	0	0.0815977
1	0	0.612382	0	0.623297	0.504055	0.481843	0	0	0
1	0	0.67108	0	0.634594	0.481843	0.496479	0	0	0.0857519
1	0	0.67108	0	0.684223	0.489078	0.536277	0	0.389224	0.150358
1	0	0.612376	0	0.708247	0.491437	0.513912	0	0	0
1	0	0.454426	0	0.67108	0.536277	0.511813	0	0.712236	0.121069
1	0	0.591604	0	0.67108	0.461065	0.504055	0	0	0
1	0	0.581697	0	0.684223	0.467843	0.496479	0	0	0
1	0	0.684223	0	0.684223	0.474767	0.536277	0	0.394635	0.135381
1	0	0.581697	0	0.684223	0.467843	0.496479	0	0	0
1	0	0.591604	0	0.623297	0.511813	0.474767	0	0	0
1	0	0.712236	0	0.623297	0.511813	0.511813	0	0	0
1	0	0.684223	0	0.697925	0.489078	0.527914	0	0.400138	0.11187
1	0	0.612376	0	0.708247	0.491437	0.521753	0	0	0
1	0	0.581697	0	0.612382	0.504055	0.467843	0	0	0
1	0	0.684223	0	0.684223	0.474767	0.536277	0	0.389224	0.130539
1	0	0.581697	0	0.684223	0.467843	0.496479	0	0	0
1	0	0.612382	0	0.623297	0.504055	0.467843	0	0	0
1	0	0.612376	0	0.708247	0.491437	0.513912	0	0	0
1	0	0.67108	0	0.646303	0.474767	0.504055	0	0	0.0836681
1	0	0.447922	0	0.67108	0.527914	0.519763	0	0.712236	0.118745
1	0	0.601825	0	0.623297	0.496479	0.474767	0	0	0
1	0	0.612376	0	0.708247	0.491437	0.513912	0	0	0
1	0	0.612376	0	0.708247	0.491437	0.513912	0	0	0
1	0	0.454426	0	0.67108	0.527914	0.519763	0	0.697925	0.121069
1	0	0.581697	0	0.67108	0.461065	0.496479	0	0	0
1	0	0.67108	0	0.634594	0.489078	0.489078	0	0	0.0942247
1	0	0.67108	0	0.684223	0.496479	0.536277	0	0.383902	0.142782
1	0	0.581697	0	0.67108	0.461065	0.496479	0	0	0
1	0	0.447922	0	0.67108	0.527914	0.519763	0	0.712236	0.123411
1	0	0.612376	0	0.708247	0.491437	0.513912	0	0	0
1	0	0.623297	0	0.612382	0.504055	0.474767	0	0	0
1	0	0.612376	0	0.708247	0.491437	0.513912	0	0	0
1	0	0.591604	0	0.612382	0.511813	0.461065	0	0	0
1	0	0.612382	0	0.623297	0.504055	0.481843	0	0.368446	0
1	0	0.461065	0	0.67108	0.527914	0.519763	0	0.697925	0.118745
1	0	0.67108	0	0.684223	0.489078	0.527914	0	0.389224	0.145287
1	0	0.591604	0	0.612382	0.504055	0.467843	0	0	0
1	0	0.461065	0	0.67108	0.527914	0.527914	0	0.697925	0.116437
1	0	0.467843	0	0.67108	0.527914	0.527914	0	0.712236	0.107367
1	0	0.67108	0	0.684223	0.489078	0.536277	0	0.383902	0.150358
1	0	0.581697	0	0.612382	0.504055	0.467843	0	0	0
1	0	0.612376	0	0.708247	0.491437	0.521753	0	0	0
1	0	0.612376	0	0.708247	0.491437	0.521753	0	0	0
1	0	0.684223	0	0.684223	0.474767	0.536277	0	0.394635	0.135381
1	0	0.591604	0	0.67108	0.461065	0.504055	0	0	0
1	0	0.708247	0	0.656876	0.529784	0.529784	0	0	0
1	0	0.612376	0	0.708247	0.48427	0.513912	0	0	0
1	0	0.623297	0	0.612382	0.504055	0.481843	0	0	0
1	0	0.601825	0	0.623297	0.511813	0.474767	0	0	0
1	0	0.67108	0	0.634594	0.481843	0.489078	0	0	0.0878493
1	0	0.684223	0	0.684223	0.481843	0.536277	0	0.389224	0.11187
1	0	0.612376	0	0.708247	0.491437	0.521753	0	0	0
1	0	0.712236	0	0.634594	0.527914	0.527914	0	0	0
1	0	0.591604	0	0.612382	0.504055	0.461065	0	0	0
1	0	0.67108	0	0.658453	0.474767	0.504055	0	0	0.0878493
1	0	0.684223	0	0.623297	0.481843	0.511813	0	0	0.0774963
1	0	0.684223	0	0.684223	0.481843	0.544863	0	0.400138	0.147813
1	0	0.697925	0	0.634594	0.474767	0.504055	0	0	0.0774963
1	0	0.67108	0	0.646303	0.474767	0.504055	0	0	0.0878493
1	0	0.67108	0	0.684223	0.496479	0.536277	0	0.378667	0.147813
1	0	0.581697	0	0.67108	0.461065	0.489078	0	0	0
1	0	0.67108	0	0.697925	0.489078	0.527914	0	0.400138	0.102927
1	0	0.581697	0	0.612382	0.511813	0.474767	0	0	0
1	0	0.591604	0	0.612382	0.511813	0.474767	0	0	0
1	0	0.697925	0	0.623297	0.519763	0.519763	0	0	0
1	0	0.581697	0	0.612382	0.504055	0.474767	0	0	0
1	0	0.461065	0	0.67108	0.527914	0.519763	0	0.697925	0.118745
1	0	0.697925	0	0.634594	0.519763	0.519763	0	0	0
1	0	0.658453	0	0.646303	0.474767	0.519763	0	0	0.0836681
1	0	0.712236	0	0.623297	0.504055	0.511813	0	0	0
1	0	0.67108	0	0.684223	0.481843	0.527914	0	0.383902	0.137829
1	0	0.67108	0	0.684223	0.481843	0.536277	0	0.389224	0.132951
1	0	0.684223	0	0.697925	0.496479	0.527914	0	0.400138	0.11187
1	0	0.67108	0	0.684223	0.489078	0.536277	0	0.394635	0.150358
1	0	0.684223	0	0.623297	0.474767	0.511813	0	0	0.0754651
1	0	0.697925	0	0.623297	0.519763	0.504055	0	0	0
1	0	0.697925	0	0.623297	0.519763	0.511813	0	0	0
1	0	0.612376	0	0.708247	0.48427	0.521753	0	0	0
1	0	0.708247	0	0.645182	0.529784	0.529784	0	0	0
1	0	0.612376	0	0.708247	0.491437	0.521753	0	0	0
1	0	0.447922	0	0.67108	0.527914	0.511813	0	0.712236	0.123411
1	0	0.612376	0	0.708247	0.491437	0.513912	0	0	0
1	0	0.67108	0	0.697925	0.489078	0.536277	0	0.394635	0.114145
1	0	0.591604	0	0.67108	0.461065	0.504055	0	0	0
1	0	0.612376	0	0.708247	0.48427	0.521753	0	0	0
1	0	0.684223	0	0.623297	0.481843	0.504055	0	0	0.0754651
1	0	0.67108	0	0.684223	0.481843	0.536277	0	0.373516	0.145287
1	0	0.684223	0	0.684223	0.481843	0.527914	0	0.383902	0.11187
1	0	0.447922	0	0.67108	0.527914	0.527914	0	0.712236	0.128145
1	0	0.684223	0	0.623297	0.519763	0.511813	0	0	0
1	0	0.454426	0	0.67108	0.527914	0.527914	0	0.712236	0.121069
1	0	0.684223	0	0.684223	0.489078	0.544863	0	0.405738	0.132951
1	0	0.612376	0	0.708247	0.491437	0.513912	0	0	0
1	0	0.684223	0	0.634594	0.481843	0.489078	0	0	0.0878493
1	0	0.712236	0	0.623297	0.511813	0.519763	0	0	0
1	0	0.581697	0	0.612382	0.504055	0.467843	0	0	0
1	0	0.447922	0	0.67108	0.527914	0.519763	0	0.712236	0.118745
1	0	0.612376	0	0.708247	0.491437	0.521753	0	0	0
1	0	0.454426	0	0.67108	0.527914	0.519763	0	0.712236	0.125769
1	0	0.684223	0	0.697925	0.496479	0.527914	0	0.400138	0.121069
1	0	0.447922	0	0.67108	0.527914	0.519763	0	0.712236	0.118745
1	0	0.461065	0	0.67108	0.527914	0.519763	0	0.697925	0.11187
1	0	0.454426	0	0.67108	0.519763	0.519763	0	0.712236	0.125769
1	0	0.612376	0	0.708247	0.491437	0.513912	0	0	0
1	0	0.612376	0	0.708247	0.48427	0.521753	0	0	0
1	0	0.697925	0	0.612382	0.511813	0.511813	0	0	0
1	0	0.454426	0	0.67108	0.519763	0.519763	0	0.712236	0.128145
1	0	0.612376	0	0.708247	0.48427	0.521753	0	0	0
1	0	0.581697	0	0.684223	0.467843	0.489078	0	0	0
1	0	0.612376	0	0.708247	0.491437	0.513912	0	0	0
1	0	0.581697	0	0.67108	0.467843	0.511813	0	0	0
1	0	0.67108	0	0.684223	0.481843	0.536277	0	0.394635	0.121069
1	0	0.467843	0	0.67108	0.527914	0.519763	0	0.712236	0.11187
1	0	0.612376	0	0.708247	0.491437	0.521753	0	0	0
1	0	0.467843	0	0.67108	0.527914	0.519763	0	0.697925	0.114145
1	0	0.697925	0	0.634594	0.511813	0.519763	0	0	0
1	0	0.591604	0	0.612382	0.511813	0.474767	0	0	0
1	0	0.697925	0	0.634594	0.461065	0.504055	0	0	0.0734466
1	0	0.697925	0	0.623297	0.511813	0.519763	0	0	0
1	0	0.454426	0	0.67108	0.536277	0.527914	0	0.712236	0.123411
1	0	0.581697	0	0.67108	0.461065	0.496479	0	0	0
1	0	0.447922	0	0.67108	0.519763	0.519763	0	0.712236	0.118745
1	0	0.581697	0	0.67108	0.461065	0.496479	0	0	0
1	0	0.581697	0	0.67108	0.461065	0.489078	0	0	0
1	0	0.708247	0	0.656876	0.529784	0.538013	0	0	0
1	0	0.712236	0	0.623297	0.527914	0.511813	0	0	0
1	0	0.712236	0	0.623297	0.504055	0.511813	0	0	0
1	0	0.447922	0	0.67108	0.519763	0.519763	0	0.712236	0.121069
1	0	0.712236	0	0.634594	0.527914	0.527914	0	0	0
1	0	0.581697	0	0.67108	0.461065	0.496479	0	0	0
1	0	0.581697	0	0.67108	0.461065	0.489078	0	0	0
1	0	0.684223	0	0.646303	0.474767	0.496479	0	0	0.0795405
1	0	0.447922	0	0.67108	0.527914	0.519763	0	0.712236	0.123411
1	0	0.454426	0	0.67108	0.527914	0.519763	0	0.712236	0.118745
1	0	0.697925	0	0.634594	0.511813	0.511813	0	0	0
1	0	0.581697	0	0.67108	0.461065	0.496479	0	0	0
1	0	0.461065	0	0.67108	0.519763	0.511813	0	0.712236	0.121069
1	0	0.612382	0	0.623297	0.511813	0.474767	0	0	0
1	0	0.581697	0	0.684223	0.467843	0.496479	0	0	0
1	0	0.694643	0	0.645182	0.529784	0.538013	0	0	0
1	0	0.612376	0	0.708247	0.491437	0.521753	0	0	0
1	0	0.684223	0	0.684223	0.489078	0.527914	0	0.394635	0.109611
1	0	0.697925	0	0.623297	0.511813	0.496479	0	0	0
1	0	0.612376	0	0.708247	0.491437	0.513912	0	0	0
1	0	0.684223	0	0.634594	0.474767	0.511813	0	0	0.0734466
1	0	0.697925	0	0.623297	0.467843	0.496479	0	0	0.0734466
1	0	0.612376	0	0.708247	0.491437	0.513912	0	0	0
1	0	0.612376	0	0.708247	0.491437	0.521753	0	0	0
1	0	0.697925	0	0.623297	0.527914	0.527914	0	0	0
1	0	0.581697	0	0.684223	0.467843	0.489078	0	0	0
1	0	0.447922	0	0.67108	0.527914	0.527914	0	0.712236	0.128145
1	0	0.581697	0	0.67108	0.461065	0.496479	0	0	0
1	0	0.67108	0	0.634594	0.474767	0.504055	0	0	0.0899605
1	0	0.612376	0	0.708247	0.491437	0.513912	0	0	0
1	0	0.591604	0	0.623297	0.511813	0.467843	0	0	0
1	0	0.612376	0	0.708247	0.491437	0.513912	0	0	0
1	0	0.581697	0	0.684223	0.467843	0.496479	0	0	0
1	0	0.712236	0	0.612382	0.519763	0.504055	0	0	0
1	0	0.67108	0	0.684223	0.489078	0.527914	0	0.389224	0.116437
1	0	0.581697	0	0.67108	0.467843	0.504055	0	0	0
1	0	0.684223	0	0.684223	0.481843	0.519763	0	0.389224	0.107367
1	0	0.67108	0	0.684223	0.489078	0.536277	0	0.389224	0.150358
1	0	0.67108	0	0.634594	0.481843	0.496479	0	0	0.0878493
1	0	0.684223	0	0.623297	0.474767	0.504055	0	0	0.0754651
1	0	0.581697	0	0.612382	0.504055	0.474767	0	0	0
1	0	0.581697	0	0.67108	0.461065	0.496479	0	0	0
1	0	0.67108	0	0.634594	0.474767	0.496479	0	0	0.0815977
1	0	0.581697	0	0.684223	0.461065	0.504055	0	0	0
1	0	0.612376	0	0.708247	0.491437	0.521753	0	0	0
1	0	0.684223	0	0.634594	0.474767	0.511813	0	0	0.0754651
1	0	0.684223	0	0.684223	0.481843	0.527914	0	0.389224	0.116437
1	0	0.612376	0	0.708247	0.491437	0.513912	0	0	0
1	0	0.684223	0	0.623297	0.474767	0.504055	0	0	0.0774963
1	0	0.601825	0	0.623297	0.496479	0.474767	0	0.330526	0
1	0	0.697925	0	0.634594	0.519763	0.511813	0	0	0
1	0	0.581697	0	0.67108	0.461065	0.496479	0	0	0
1	0	0.67108	0	0.684223	0.481843	0.527914	0	0.383902	0.145287
1	0	0.697925	0	0.623297	0.481843	0.504055	0	0	0.0734466
1	0	0.697925	0	0.623297	0.527914	0.519763	0	0	0
1	0	0.67108	0	0.684223	0.489078	0.527914	0	0.383902	0.140296
1	0	0.447922	0	0.67108	0.527914	0.519763	0	0.712236	0.123411
1	0	0.712236	0	0.634594	0.504055	0.527914	0	0	0
1	0	0.684223	0	0.697925	0.489078	0.536277	0	0.394635	0.11187
1	0	0.612376	0	0.708247	0.491437	0.521753	0	0	0
1	0	0.581697	0	0.684223	0.461065	0.496479	0	0	0
1	0	0.612376	0	0.708247	0.491437	0.513912	0	0	0
1	0	0.591604	0	0.67108	0.461065	0.504055	0	0	0
1	0	0.67108	0	0.684223	0.489078	0.536277	0	0.394635	0.150358
1	0	0.591604	0	0.67108	0.454426	0.504055	0	0	0
1	0	0.684223	0	0.634594	0.467843	0.511813	0	0	0.067466
1	0	0.612382	0	0.623297	0.504055	0.481843	0	0	0
1	0	0.697925	0	0.634594	0.467843	0.504055	0	0	0.0734466
1	0	0.67108	0	0.684223	0.481843	0.527914	0	0.383902	0.145287
1	0	0.581697	0	0.67108	0.461065	0.504055	0	0	0
1	0	0.612376	0	0.708247	0.48427	0.521753	0	0	0
1	0	0.461065	0	0.67108	0.536277	0.527914	0	0.697925	0.121069
1	0	0.684223	0	0.684223	0.489078	0.536277	0	0.394635	0.155509
1	0	0.612376	0	0.708247	0.491437	0.513912	0	0	0
1	0	0.67108	0	0.697925	0.489078	0.536277	0	0.383902	0.100729
1	0	0.612376	0	0.708247	0.48427	0.521753	0	0	0
1	0	0.447922	0	0.67108	0.527914	0.519763	0	0.712236	0.121069
1	0	0.581697	0	0.684223	0.461065	0.504055	0	0	0
1	0	0.581697	0	0.612382	0.504055	0.467843	0	0	0
1	0	0.684223	0	0.634594	0.481843	0.504055	0	0	0.0815977
1	0	0.612376	0	0.708247	0.491437	0.513912	0	0	0
1	0	0.581697	0	0.67108	0.461065	0.496479	0	0	0
1	0	0.612382	0	0.623297	0.511813	0.474767	0	0.335028	0
1	0	0.612376	0	0.708247	0.491437	0.513912	0	0	0
1	0	0.447922	0	0.67108	0.527914	0.527914	0	0.712236	0.125769
1	0	0.684223	0	0.634594	0.474767	0.496479	0	0	0.0795405
1	0	0.591604	0	0.612382	0.504055	0.467843	0	0	0
1	0	0.612382	0	0.623297	0.504055	0.474767	0	0	0
1	0	0.67108	0	0.634594	0.489078	0.504055	0	0	0.0836681
1	0	0.591604	0	0.612382	0.511813	0.474767	0	0	0
1	0	0.612376	0	0.708247	0.491437	0.513912	0	0	0
1	0	0.67108	0	0.684223	0.481843	0.536277	0	0.389224	0.140296
1	0	0.684223	0	0.697925	0.489078	0.527914	0	0.373516	0.109611
1	0	0.684223	0	0.634594	0.519763	0.504055	0	0	0
1	0	0.581697	0	0.684223	0.467843	0.496479	0	0	0
1	0	0.684223	0	0.684223	0.481843	0.536277	0	0.400138	0.130539
1	0	0.454426	0	0.67108	0.527914	0.519763	0	0.712236	0.121069
1	0	0.684223	0	0.634594	0.481843	0.489078	0	0	0.0774963
1	0	0.454426	0	0.67108	0.519763	0.519763	0	0.712236	0.128145
1	0	0.697925	0	0.623297	0.504055	0.504055	0	0	0
1	0	0.697925	0	0.623297	0.519763	0.496479	0	0	0
1	0	0.612376	0	0.708247	0.491437	0.513912	0	0	0
1	0	0.581697	0	0.67108	0.467843	0.504055	0	0	0
1	0	0.454426	0	0.67108	0.519763	0.519763	0	0.712236	0.128145
1	0	0.581697	0	0.67108	0.467843	0.504055	0	0	0
1	0	0.581697	0	0.684223	0.467843	0.496479	0	0	0
1	0	0.67108	0	0.684223	0.496479	0.536277	0	0.378667	0.145287
1	0	0.612376	0	0.708247	0.491437	0.513912	0	0	0
1	0	0.67108	0	0.697925	0.489078	0.536277	0	0.389224	0.107367
1	0	0.581697	0	0.67108	0.467843	0.504055	0	0	0
1	0	0.684223	0	0.623297	0.474767	0.504055	0	0	0.0714407
1	0	0.581697	0	0.684223	0.467843	0.489078	0	0	0
1	0	0.454426	0	0.67108	0.527914	0.519763	0	0.712236	0.116437
1	0	0.684223	0	0.646303	0.474767	0.504055	0	0	0.0836681
1	0	0.684223	0	0.684223	0.481843	0.519763	0	0.383902	0.121069
1	0	0.461065	0	0.67108	0.527914	0.527914	0	0.712236	0.114145
1	0	0.612376	0	0.708247	0.491437	0.513912	0	0	0
1	0	0.612376	0	0.708247	0.491437	0.513912	0	0	0
1	0	0.697925	0	0.623297	0.467843	0.504055	0	0	0.0774963
1	0	0.467843	0	0.67108	0.527914	0.519763	0	0.697925	0.109611
1	0	0.658453	0	0.658453	0.474767	0.511813	0	0	0.0899605
1	0	0.697925	0	0.634594	0.519763	0.496479	0	0	0
1	0	0.581697	0	0.67108	0.467843	0.504055	0	0	0
1	0	0.697925	0	0.612382	0.511813	0.519763	0	0	0
1	0	0.454426	0	0.67108	0.519763	0.519763	0	0.712236	0.125769
1	0	0.623297	0	0.612382	0.504055	0.474767	0	0	0
1	0	0.441547	0	0.67108	0.519763	0.511813	0	0.712236	0.121069
1	0	0.581697	0	0.67108	0.467843	0.511813	0	0	0
1	0	0.623297	0	0.623297	0.504055	0.481843	0	0.368446	0
1	0	0.461065	0	0.67108	0.519763	0.519763	0	0.712236	0.123411
1	0	0.454426	0	0.67108	0.527914	0.519763	0	0.712236	0.121069
1	0	0.581697	0	0.67108	0.467843	0.511813	0	0	0
1	0	0.612382	0	0.623297	0.504055	0.481843	0	0	0
1	0	0.684223	0	0.623297	0.481843	0.511813	0	0	0.0815977
1	0	0.612376	0	0.708247	0.491437	0.521753	0	0	0
1	0	0.684223	0	0.623297	0.467843	0.504055	0	0	0.0734466
1	0	0.67108	0	0.697925	0.489078	0.536277	0	0.394635	0.114145
1	0	0.612376	0	0.708247	0.491437	0.513912	0	0	0
1	0	0.461065	0	0.67108	0.536277	0.519763	0	0.712236	0.121069
1	0	0.447922	0	0.67108	0.527914	0.519763	0	0.712236	0.118745
1	0	0.612376	0	0.708247	0.491437	0.521753	0	0	0
1	0	0.454426	0	0.67108	0.527914	0.527914	0	0.712236	0.123411
1	0	0.612376	0	0.708247	0.491437	0.521753	0	0	0
1	0	0.612376	0	0.708247	0.491437	0.521753	0	0	0
1	0	0.612382	0	0.623297	0.504055	0.481843	0	0.353697	0
1	0	0.612376	0	0.708247	0.491437	0.521753	0	0	0
1	0	0.591604	0	0.612382	0.511813	0.467843	0	0.339595	0
1	0	0.581697	0	0.684223	0.467843	0.489078	0	0	0
1	0	0.67108	0	0.684223	0.496479	0.527914	0	0.394635	0.145287
1	0	0.684223	0	0.646303	0.474767	0.504055	0	0	0.0815977
1	0	0.612382	0	0.623297	0.504055	0.467843	0	0.353697	0
1	0	0.67108	0	0.684223	0.481843	0.536277	0	0.383902	0.128145
1	0	0.697925	0	0.634594	0.519763	0.511813	0	0	0
1	0	0.581697	0	0.67108	0.467843	0.511813	0	0	0
1	0	0.684223	0	0.646303	0.474767	0.504055	0	0	0.0795405
1	0	0.684223	0	0.684223	0.481843	0.527914	0	0.389224	0.105139
1	0	0.467843	0	0.67108	0.527914	0.519763	0	0.712236	0.11187
1	0	0.67108	0	0.646303	0.474767	0.504055	0	0	0.0878493
1	0	0.67108	0	0.684223	0.489078	0.536277	0	0.389224	0.150358
1	0	0.712236	0	0.623297	0.511813	0.519763	0	0	0
1	0	0.612382	0	0.623297	0.504055	0.461065	0	0	0
1	0	0.581697	0	0.67108	0.467843	0.511813	0	0	0
1	0	0.581697	0	0.67108	0.461065	0.496479	0	0	0
1	0	0.612376	0	0.708247	0.491437	0.513912	0	0	0
1	0	0.697925	0	0.623297	0.504055	0.504055	0	0	0
1	0	0.697925	0	0.634594	0.467843	0.504055	0	0	0.0774963
1	0	0.591604	0	0.612382	0.511813	0.474767	0	0	0
1	0	0.447922	0	0.67108	0.519763	0.519763	0	0.712236	0.118745
1	0	0.684223	0	0.697925	0.489078	0.527914	0	0.383902	0.11187
1	0	0.601825	0	0.623297	0.511813	0.474767	0	0	0
1	0	0.697925	0	0.612382	0.511813	0.511813	0	0	0
1	0	0.612376	0	0.708247	0.491437	0.521753	0	0	0
1	0	0.612382	0	0.623297	0.504055	0.467843	0	0	0
1	0	0.454426	0	0.67108	0.536277	0.527914	0	0.712236	0.123411
1	0	0.697925	0	0.623297	0.527914	0.511813	0	0	0
1	0	0.612376	0	0.708247	0.491437	0.521753	0	0	0
1	0	0.697925	0	0.634594	0.496479	0.519763	0	0	0
1	0	0.684223	0	0.623297	0.474767	0.504055	0	0	0.0714407
1	0	0.591604	0	0.612382	0.511813	0.467843	0	0.335028	0
1	0	0.612376	0	0.708247	0.491437	0.513912	0	0	0
1	0	0.581697	0	0.67108	0.461065	0.496479	0	0	0
1	0	0.581697	0	0.612382	0.504055	0.467843	0	0	0
1	0	0.612376	0	0.708247	0.48427	0.521753	0	0	0
1	0	0.591604	0	0.623297	0.519763	0.467843	0	0	0
1	0	0.712236	0	0.623297	0.511813	0.519763	0	0	0
1	0	0.461065	0	0.67108	0.519763	0.511813	0	0.712236	0.123411
1	0	0.612376	0	0.708247	0.48427	0.521753	0	0	0
1	0	0.581697	0	0.67108	0.467843	0.511813	0	0	0
1	0	0.612376	0	0.708247	0.48427	0.521753	0	0	0
1	0	0.67108	0	0.684223	0.481843	0.536277	0	0.389224	0.147813
1	0	0.461065	0	0.67108	0.519763	0.519763	0	0.712236	0.125769
1	0	0.658453	0	0.658453	0.474767	0.511813	0	0	0.0836681
1	0	0.612382	0	0.623297	0.504055	0.474767	0	0.344228	0
1	0	0.684223	0	0.634594	0.511813	0.511813	0	0	0
1	0	0.684223	0	0.623297	0.519763	0.511813	0	0	0
1	0	0.454426	0	0.658453	0.519763	0.527914	0	0.712236	0.130539
1	0	0.67108	0	0.684223	0.489078	0.536277	0	0.400138	0.107367
1	0	0.581697	0	0.67108	0.467843	0.504055	0	0	0
1	0	0.601825	0	0.623297	0.504055	0.467843	0	0	0
1	0	0.658453	0	0.646303	0.474767	0.504055	0	0	0.0878493
1	0	0.581697	0	0.67108	0.461065	0.504055	0	0	0
1	0	0.684223	0	0.697925	0.489078	0.527914	0	0.389224	0.114145
1	0	0.67108	0	0.634594	0.481843	0.496479	0	0	0.0878493
1	0	0.712236	0	0.623297	0.527914	0.519763	0	0	0
1	0	0.67108	0	0.684223	0.481843	0.536277	0	0.378667	0.130539
1	0	0.601825	0	0.623297	0.511813	0.474767	0	0.368446	0
1	0	0.684223	0	0.684223	0.481843	0.544863	0	0.394635	0.147813
1	0	0.447922	0	0.67108	0.519763	0.519763	0	0.712236	0.118745
1	0	0.591604	0	0.612382	0.511813	0.467843	0	0.339595	0
1	0	0.697925	0	0.634594	0.511813	0.519763	0	0	0
1	0	0.623297	0	0.623297	0.504055	0.474767	0	0	0
1	0	0.591604	0	0.612382	0.504055	0.467843	0	0	0
1	0	0.447922	0	0.67108	0.527914	0.519763	0	0.712236	0.116437
1	0	0.697925	0	0.634594	0.511813	0.519763	0	0	0
1	0	0.67108	0	0.646303	0.474767	0.504055	0	0	0.0942247
1	0	0.612376	0	0.708247	0.491437	0.521753	0	0	0
1	0	0.658453	0	0.646303	0.474767	0.511813	0	0	0.0815977
1	0	0.623297	0	0.612382	0.504055	0.474767	0	0.344228	0
1	0	0.67108	0	0.684223	0.489078	0.536277	0	0.389224	0.152923
1	0	0.612376	0	0.708247	0.491437	0.521753	0	0	0
1	0	0.591604	0	0.612382	0.511813	0.467843	0	0.348928	0
1	0	0.67108	0	0.634594	0.481843	0.496479	0	0	0.0942247
1	0	0.684223	0	0.646303	0.474767	0.496479	0	0	0.0878493
1	0	0.581697	0	0.684223	0.467843	0.489078	0	0	0
1	0	0.612376	0	0.708247	0.491437	0.513912	0	0	0
1	0	0.581697	0	0.67108	0.461065	0.496479	0	0	0
1	0	0.612376	0	0.708247	0.491437	0.521753	0	0	0
1	0	0.623297	0	0.612382	0.504055	0.481843	0	0	0
1	0	0.612376	0	0.708247	0.491437	0.513912	0	0	0
1	0	0.67108	0	0.684223	0.489078	0.527914	0	0.383902	0.102927
1	0	0.612382	0	0.612382	0.504055	0.481843	0	0.353697	0
1	0	0.581697	0	0.684223	0.467843	0.496479	0	0	0
1	0	0.67108	0	0.646303	0.474767	0.511813	0	0	0.0963783
1	0	0.612382	0	0.623297	0.504055	0.481843	0	0	0
1	0	0.612382	0	0.623297	0.504055	0.474767	0	0	0
1	0	0.581697	0	0.67108	0.467843	0.511813	0	0	0
1	0	0.697925	0	0.612382	0.511813	0.527914	0	0	0
1	0	0.581697	0	0.67108	0.467843	0.511813	0	0	0
1	0	0.67108	0	0.634594	0.481843	0.489078	0	0	0.0899605
1	0	0.601825	0	0.623297	0.496479	0.474767	0	0.330526	0
1	0	0.612376	0	0.708247	0.491437	0.513912	0	0	0
1	0	0.581697	0	0.612382	0.504055	0.467843	0	0	0
1	0	0.697925	0	0.634594	0.504055	0.511813	0	0	0
1	0	0.684223	0	0.697925	0.489078	0.527914	0	0.394635	0.114145
1	0	0.623297	0	0.623297	0.504055	0.481843	0	0	0
1	0	0.581697	0	0.612382	0.504055	0.467843	0	0	0
1	0	0.461065	0	0.67108	0.536277	0.527914	0	0.697925	0.121069
1	0	0.581697	0	0.67108	0.461065	0.489078	0	0	0
1	0	0.581697	0	0.684223	0.461065	0.496479	0	0	0
1	0	0.67108	0	0.684223	0.489078	0.536277	0	0.389224	0.145287
1	0	0.581697	0	0.67108	0.461065	0.496479	0	0	0
1	0	0.461065	0	0.67108	0.527914	0.527914	0	0.712236	0.116437
1	0	0.684223	0	0.684223	0.481843	0.536277	0	0.389224	0.116437
1	0	0.684223	0	0.684223	0.496479	0.544863	0	0.389224	0.155509
1	0	0.708247	0	0.645182	0.521753	0.529784	0	0	0
1	0	0.684223	0	0.684223	0.489078	0.536277	0	0.383902	0.105139
1	0	0.712236	0	0.623297	0.519763	0.511813	0	0	0
1	0	0.67108	0	0.634594	0.481843	0.496479	0	0	0.0857519
1	0	0.581697	0	0.67108	0.461065	0.496479	0	0	0
1	0	0.612376	0	0.708247	0.491437	0.521753	0	0	0
1	0	0.581697	0	0.67108	0.461065	0.504055	0	0	0
1	0	0.581697	0	0.684223	0.461065	0.504055	0	0	0
1	0	0.581697	0	0.67108	0.467843	0.511813	0	0	0
1	0	0.712236	0	0.623297	0.504055	0.519763	0	0	0
1	0	0.67108	0	0.697925	0.489078	0.527914	0	0.394635	0.102927
1	0	0.612376	0	0.708247	0.491437	0.513912	0	0	0
1	0	0.612376	0	0.708247	0.491437	0.513912	0	0	0
1	0	0.684223	0	0.646303	0.474767	0.496479	0	0	0.0857519
1	0	0.612376	0	0.708247	0.48427	0.521753	0	0	0
1	0	0.623297	0	0.612382	0.504055	0.481843	0	0	0
1	0	0.581697	0	0.684223	0.461065	0.504055	0	0	0
1	0	0.697925	0	0.623297	0.527914	0.511813	0	0	0
1	0	0.581697	0	0.684223	0.461065	0.504055	0	0	0
1	0	0.67108	0	0.634594	0.474767	0.496479	0	0	0.0836681
1	0	0.612382	0	0.623297	0.504055	0.474767	0	0.335028	0
1	0	0.712236	0	0.623297	0.504055	0.511813	0	0	0
1	0	0.612376	0	0.708247	0.491437	0.513912	0	0	0
1	0	0.581697	0	0.67108	0.461065	0.496479	0	0	0
1	0	0.684223	0	0.697925	0.481843	0.536277	0	0.383902	0.11187
1	0	0.454426	0	0.658453	0.519763	0.527914	0	0.712236	0.132951
1	0	0.684223	0	0.684223	0.474767	0.544863	0	0.389224	0.125769
1	0	0.684223	0	0.646303	0.474767	0.496479	0	0	0.0878493
1	0	0.697925	0	0.634594	0.467843	0.504055	0	0	0.0795405
1	0	0.581697	0	0.67108	0.467843	0.511813	0	0	0
1	0	0.581697	0	0.612382	0.511813	0.467843	0	0	0
1	0	0.697925	0	0.623297	0.504055	0.519763	0	0	0
1	0	0.612376	0	0.708247	0.48427	0.521753	0	0	0
1	0	0.612376	0	0.708247	0.491437	0.513912	0	0	0
1	0	0.461065	0	0.67108	0.527914	0.527914	0	0.697925	0.118745
1	0	0.684223	0	0.634594	0.481843	0.504055	0	0	0.0857519
1	0	0.684223	0	0.623297	0.467843	0.504055	0	0	0.0795405
1	0	0.623297	0	0.612382	0.504055	0.481843	0	0.339595	0
1	0	0.591604	0	0.67108	0.461065	0.504055	0	0	0
1	0	0.612382	0	0.623297	0.504055	0.467843	0	0	0
1	0	0.454426	0	0.67108	0.527914	0.519763	0	0.697925	0.118745
1	0	0.684223	0	0.634594	0.481843	0.496479	0	0	0.0836681
1	0	0.612382	0	0.623297	0.504055	0.467843	0	0.339595	0
1	0	0.697925	0	0.623297	0.519763	0.527914	0	0	0
1	0	0.581697	0	0.612382	0.511813	0.474767	0	0	0
1	0	0.454426	0	0.67108	0.527914	0.519763	0	0.712236	0.116437
1	0	0.612376	0	0.708247	0.491437	0.513912	0	0	0
1	0	0.684223	0	0.697925	0.496479	0.527914	0	0.405738	0.11187
1	0	0.447922	0	0.67108	0.519763	0.519763	0	0.712236	0.125769
1	0	0.612382	0	0.623297	0.511813	0.481843	0	0	0
1	0	0.684223	0	0.623297	0.467843	0.504055	0	0	0.0754651
1	0	0.581697	0	0.612382	0.504055	0.467843	0	0	0
1	0	0.612376	0	0.708247	0.491437	0.513912	0	0	0
1	0	0.581697	0	0.67108	0.467843	0.511813	0	0	0
1	0	0.461065	0	0.67108	0.536277	0.527914	0	0.712236	0.128145
1	0	0.67108	0	0.684223	0.489078	0.544863	0	0.383902	0.155509
1	0	0.694643	0	0.633884	0.54645	0.521753	0	0	0
1	0	0.67108	0	0.684223	0.489078	0.536277	0	0.383902	0.137829
1	0	0.697925	0	0.612382	0.511813	0.519763	0	0	0
1	0	0.612376	0	0.708247	0.491437	0.513912	0	0	0
1	0	0.684223	0	0.684223	0.489078	0.544863	0	0.394635	0.150358
1	0	0.67108	0	0.684223	0.489078	0.527914	0	0.389224	0.145287
1	0	0.612382	0	0.623297	0.504055	0.461065	0	0	0
1	0	0.612376	0	0.708247	0.491437	0.513912	0	0	0
1	0	0.697925	0	0.623297	0.519763	0.496479	0	0	0
1	0	0.684223	0	0.697925	0.489078	0.527914	0	0.394635	0.107367
1	0	0.612376	0	0.708247	0.491437	0.521753	0	0	0
1	0	0.658453	0	0.646303	0.474767	0.511813	0	0	0.0754651
1	0	0.67108	0	0.684223	0.481843	0.527914	0	0.378667	0.142782
1	0	0.612376	0	0.708247	0.491437	0.513912	0	0	0
1	0	0.581697	0	0.67108	0.467843	0.504055	0	0	0
1	0	0.67108	0	0.646303	0.474767	0.496479	0	0	0.102927
1	0	0.591604	0	0.612382	0.511813	0.474767	0	0	0
1	0	0.612376	0	0.708247	0.48427	0.521753	0	0	0
1	0	0.684223	0	0.697925	0.496479	0.527914	0	0.400138	0.125769
1	0	0.67108	0	0.684223	0.489078	0.527914	0	0.383902	0.137829
1	0	0.658453	0	0.634594	0.489078	0.504055	0	0	0.0857519
1	0	0.697925	0	0.623297	0.511813	0.496479	0	0	0
1	0	0.684223	0	0.684223	0.489078	0.527914	0	0.400138	0.109611
1	0	0.601825	0	0.623297	0.504055	0.467843	0	0.330526	0
1	0	0.461065	0	0.67108	0.527914	0.519763	0	0.712236	0.114145
1	0	0.684223	0	0.634594	0.481843	0.504055	0	0	0.0836681
1	0	0.612382	0	0.623297	0.504055	0.481843	0	0	0
1	0	0.612382	0	0.623297	0.504055	0.474767	0	0	0
1	0	0.581697	0	0.67108	0.454426	0.496479	0	0	0
1	0	0.591604	0	0.623297	0.511813	0.474767	0	0	0
1	0	0.67108	0	0.684223	0.481843	0.527914	0	0.383902	0.140296
1	0	0.684223	0	0.634594	0.481843	0.496479	0	0	0.0815977
1	0	0.454426	0	0.67108	0.536277	0.527914	0	0.712236	0.121069
1	0	0.67108	0	0.684223	0.481843	0.536277	0	0.389224	0.118745
1	0	0.612376	0	0.708247	0.491437	0.521753	0	0	0
1	0	0.441547	0	0.67108	0.519763	0.519763	0	0.712236	0.123411
1	0	0.581697	0	0.67108	0.461065	0.504055	0	0	0
1	0	0.684223	0	0.634594	0.467843	0.511813	0	0	0.0795405
1	0	0.684223	0	0.684223	0.481843	0.527914	0	0.383902	0.114145
1	0	0.601825	0	0.623297	0.504055	0.474767	0	0	0
1	0	0.67108	0	0.684223	0.474767	0.536277	0	0.383902	0.142782
1	0	0.697925	0	0.623297	0.519763	0.519763	0	0	0
1	0	0.461065	0	0.67108	0.527914	0.519763	0	0.697925	0.118745
1	0	0.612376	0	0.708247	0.48427	0.521753	0	0	0
1	0	0.612376	0	0.708247	0.491437	0.513912	0	0	0
1	0	0.684223	0	0.697925	0.489078	0.527914	0	0.383902	0.109611
1	0	0.461065	0	0.67108	0.536277	0.519763	0	0.712236	0.125769
1	0	0.712236	0	0.634594	0.504055	0.511813	0	0	0
1	0	0.461065	0	0.67108	0.527914	0.527914	0	0.712236	0.11187
1	0	0.601825	0	0.623297	0.511813	0.474767	0	0	0
1	0	0.461065	0	0.67108	0.536277	0.519763	0	0.712236	0.123411
1	0	0.581697	0	0.67108	0.461065	0.496479	0	0	0
1	0	0.684223	0	0.623297	0.481843	0.511813	0	0	0.0654969
1	0	0.612376	0	0.708247	0.491437	0.513912	0	0	0
1	0	0.581697	0	0.612382	0.504055	0.474767	0	0	0
1	0	0.461065	0	0.67108	0.536277	0.527914	0	0.712236	0.121069
1	0	0.581697	0	0.67108	0.467843	0.504055	0	0	0
1	0	0.612376	0	0.708247	0.48427	0.521753	0	0	0
1	0	0.581697	0	0.67108	0.467843	0.511813	0	0	0
1	0	0.612376	0	0.708247	0.48427	0.521753	0	0	0
1	0	0.441547	0	0.67108	0.519763	0.511813	0	0.712236	0.121069
1	0	0.612376	0	0.708247	0.48427	0.521753	0	0	0
1	0	0.684223	0	0.634594	0.481843	0.496479	0	0	0.0857519
1	0	0.454426	0	0.67108	0.536277	0.527914	0	0.712236	0.123411
1	0	0.697925	0	0.634594	0.474767	0.504055	0	0	0.0774963
1	0	0.712236	0	0.634594	0.504055	0.511813	0	0	0
1	0	0.454426	0	0.67108	0.519763	0.511813	0	0.712236	0.123411
1	0	0.684223	0	0.623297	0.481843	0.511813	0	0	0.0734466
1	0	0.581697	0	0.67108	0.467843	0.511813	0	0	0
1	0	0.612376	0	0.708247	0.491437	0.513912	0	0	0
1	0	0.67108	0	0.684223	0.489078	0.544863	0	0.394635	0.114145
1	0	0.67108	0	0.646303	0.474767	0.504055	0	0	0.0857519
1	0	0.684223	0	0.697925	0.489078	0.536277	0	0.389224	0.0985463
1	0	0.447922	0	0.67108	0.527914	0.519763	0	0.712236	0.123411
1	0	0.67108	0	0.697925	0.489078	0.536277	0	0.400138	0.105139
1	0	0.697925	0	0.612382	0.519763	0.511813	0	0	0
1	0	0.612376	0	0.708247	0.48427	0.521753	0	0	0
1	0	0.697925	0	0.634594	0.467843	0.496479	0	0	0.0714407
1	0	0.658453	0	0.646303	0.474767	0.519763	0	0	0.0836681
1	0	0.612376	0	0.708247	0.491437	0.513912	0	0	0
1	0	0.447922	0	0.67108	0.519763	0.519763	0	0.712236	0.118745
1	0	0.612376	0	0.708247	0.491437	0.513912	0	0	0
1	0	0.591604	0	0.67108	0.454426	0.504055	0	0	0
1	0	0.684223	0	0.697925	0.489078	0.527914	0	0.405738	0.118745
1	0	0.591604	0	0.612382	0.511813	0.461065	0	0.326085	0
1	0	0.697925	0	0.646303	0.511813	0.511813	0	0	0
1	0	0.684223	0	0.634594	0.467843	0.511813	0	0	0.0774963
1	0	0.454426	0	0.67108	0.536277	0.527914	0	0.697925	0.128145
1	0	0.684223	0	0.634594	0.481843	0.496479	0	0	0.0878493
1	0	0.612376	0	0.708247	0.491437	0.513912	0	0	0
1	0	0.684223	0	0.697925	0.489078	0.536277	0	0.383902	0.114145
1	0	0.67108	0	0.697925	0.481843	0.536277	0	0.394635	0.118745
1	0	0.441547	0	0.67108	0.519763	0.519763	0	0.712236	0.123411
1	0	0.454426	0	0.67108	0.536277	0.527914	0	0.712236	0.123411
1	0	0.612376	0	0.708247	0.491437	0.521753	0	0	0
1	0	0.612376	0	0.708247	0.48427	0.521753	0	0	0
1	0	0.612376	0	0.708247	0.491437	0.513912	0	0	0
1	0	0.697925	0	0.623297	0.467843	0.489078	0	0	0.0774963
1	0	0.454426	0	0.67108	0.536277	0.519763	0	0.712236	0.121069
1	0	0.447922	0	0.67108	0.519763	0.519763	0	0.712236	0.121069
1	0	0.454426	0	0.67108	0.527914	0.519763	0	0.697925	0.114145
1	0	0.581697	0	0.684223	0.467843	0.496479	0	0	0
1	0	0.67108	0	0.684223	0.481843	0.536277	0	0.383902	0.118745
1	0	0.684223	0	0.623297	0.527914	0.504055	0	0	0
1	0	0.461065	0	0.67108	0.527914	0.519763	0	0.697925	0.114145
1	0	0.697925	0	0.623297	0.527914	0.496479	0	0	0
1	0	0.658453	0	0.646303	0.481843	0.511813	0	0	0.0899605
1	0	0.581697	0	0.67108	0.467843	0.504055	0	0	0
1	0	0.591604	0	0.623297	0.511813	0.467843	0	0	0
1	0	0.591604	0	0.612382	0.504055	0.467843	0	0	0
1	0	0.697925	0	0.623297	0.519763	0.496479	0	0	0
1	0	0.612382	0	0.623297	0.504055	0.481843	0	0	0
1	0	0.612376	0	0.708247	0.491437	0.513912	0	0	0
1	0	0.612376	0	0.708247	0.491437	0.513912	0	0	0
1	0	0.684223	0	0.697925	0.496479	0.527914	0	0.405738	0.123411
1	0	0.697925	0	0.634594	0.504055	0.511813	0	0	0
1	0	0.581697	0	0.612382	0.511813	0.467843	0	0	0
1	0	0.461065	0	0.67108	0.527914	0.527914	0	0.697925	0.11187
1	0	0.601825	0	0.623297	0.504055	0.467843	0	0.348928	0
1	0	0.612376	0	0.708247	0.491437	0.521753	0	0	0
1	0	0.612376	0	0.708247	0.491437	0.513912	0	0	0
[truncated: 1 more rows]
