# Supplementary material for: Virtual brain twins for stimulation in epilepsy
Source: Research Square preprint supplement (doi:10.21203/rs.3.rs-4908955/v1), 2024-09-03
Supplement: Supplementary file 5 [file Patient1_TI_stimulation.xlsx]

## Sheet: Sheet1
Left-O2	Left-O1	Left-Lingual-gyrus	Left-T2-posterior	Left-Occipital-pole	Left-Calcarine-sulcus	Left-STS-posterior	Left-Cuneus	Left-Lingual-sulcus	Left-Temporal-pole
1	0.77744	0.761429	0.77744	0	0.643392	0.916996	0.343924	0.421891	0.268987
1	0.77744	0.666346	0.478859	0	0.46536	0.916996	0.794233	0.522858	0.284286
1	0.811888	0.746129	0.830497	0.439853	0.53077	0.916996	0.611599	0.45237	0.317091
1	0.794233	0.77744	0.77744	0.427775	0.46536	0.916996	0.632465	0.621874	0.339304
1	0.830497	0.731481	0.811888	0.433761	0.547163	0.916996	0.811888	0.515123	0.317091
1	0.830497	0.731481	0.811888	0.427775	0.547163	0.916996	0.811888	0.515123	0.325805
1	0.77744	0.666346	0.472043	0	0.46536	0.916996	0.794233	0.522858	0.28822
1	0.811888	0.746129	0.830497	0.458804	0.53077	0.916996	0.621874	0.446055	0.30442
1	0.830497	0.731481	0.811888	0.427775	0.547163	0.916996	0.811888	0.515123	0.32142
1	0.830497	0.746129	0.811888	0.410418	0.555662	0.916996	0.621874	0.472043	0.325805
1	0.811888	0.746129	0.830497	0.458804	0.53077	0.916996	0.621874	0.439853	0.30442
1	0.811888	0.746129	0.830497	0.439853	0.53077	0.916996	0.611599	0.45237	0.317091
1	0.830497	0.761429	0.811888	0.421891	0.53077	0.916996	0.601621	0.439853	0.348607
1	0.830497	0.746129	0.811888	0.410418	0.555662	0.916996	0.621874	0.472043	0.330246
1	0.794233	0.761429	0.77744	0.433761	0.478859	0.942502	0.643392	0.621874	0.339304
1	0.830497	0.746129	0.811888	0.410418	0.555662	0.916996	0.621874	0.472043	0.325805
1	0.830497	0.746129	0.811888	0.410418	0.555662	0.916996	0.621874	0.472043	0.32142
1	0.77744	0.666346	0.478859	0	0.472043	0.916996	0.794233	0.53077	0.284286
1	0.830497	0.761429	0.811888	0.427775	0.53077	0.916996	0.601621	0.439853	0.348607
1	0.811888	0.746129	0.811888	0.458804	0.53077	0.916996	0.621874	0.446055	0.300298
1	0.761429	0.761429	0.77744	0	0.643392	0.942502	0.343924	0.421891	0.265266
1	0.830497	0.746129	0.811888	0.410418	0.555662	0.916996	0.621874	0.472043	0.325805
1	0.811888	0.761429	0.811888	0.427775	0.538869	0.916996	0.611599	0.439853	0.334745
1	0.746129	0.746129	0.77744	0	0.654678	0.916996	0.339304	0.416107	0.257942
1	0.830497	0.77744	0.811888	0.421891	0.53077	0.916996	0.601621	0.439853	0.353354
1	0.794233	0.761429	0.77744	0.433761	0.478859	0.942502	0.643392	0.621874	0.343924
1	0.811888	0.746129	0.830497	0.439853	0.538869	0.916996	0.611599	0.458804	0.312815
1	0.830497	0.731481	0.811888	0.427775	0.547163	0.916996	0.811888	0.522858	0.32142
1	0.830497	0.731481	0.811888	0.427775	0.547163	0.916996	0.811888	0.515123	0.317091
1	0.830497	0.746129	0.794233	0.410418	0.555662	0.916996	0.621874	0.472043	0.317091
1	0.794233	0.761429	0.761429	0.439853	0.478859	0.942502	0.632465	0.632465	0.325805
1	0.830497	0.761429	0.811888	0.421891	0.53077	0.916996	0.601621	0.439853	0.353354
1	0.77744	0.666346	0.478859	0	0.46536	0.916996	0.794233	0.53077	0.28822
1	0.830497	0.761429	0.811888	0.427775	0.53077	0.916996	0.601621	0.439853	0.343924
1	0.811888	0.746129	0.830497	0.458804	0.53077	0.916996	0.621874	0.446055	0.30442
1	0.811888	0.746129	0.830497	0.439853	0.53077	0.916996	0.611599	0.45237	0.317091
1	0.77744	0.666346	0.472043	0	0.46536	0.916996	0.794233	0.522858	0.284286
1	0.77744	0.666346	0.472043	0	0.472043	0.916996	0.794233	0.53077	0.28822
1	0.830497	0.761429	0.811888	0.416107	0.538869	0.916996	0.611599	0.433761	0.353354
1	0.830497	0.761429	0.811888	0.421891	0.53077	0.916996	0.601621	0.439853	0.343924
1	0.77744	0.761429	0.77744	0	0.643392	0.916996	0.334745	0.416107	0.268987
1	0.811888	0.746129	0.811888	0.458804	0.53077	0.916996	0.621874	0.446055	0.300298
1	0.830497	0.746129	0.811888	0.410418	0.555662	0.916996	0.621874	0.46536	0.325805
1	0.794233	0.77744	0.77744	0.427775	0.478859	0.916996	0.632465	0.632465	0.339304
1	0.811888	0.761429	0.811888	0.427775	0.538869	0.916996	0.611599	0.446055	0.343924
1	0.830497	0.731481	0.811888	0.433761	0.547163	0.916996	0.811888	0.515123	0.317091
1	0.794233	0.77744	0.77744	0	0.643392	0.942502	0.339304	0.416107	0.257942
1	0.77744	0.666346	0.472043	0	0.46536	0.916996	0.794233	0.53077	0.28822
1	0.811888	0.746129	0.830497	0.446055	0.53077	0.916996	0.611599	0.45237	0.317091
1	0.830497	0.746129	0.811888	0.410418	0.555662	0.916996	0.621874	0.472043	0.32142
1	0.794233	0.761429	0.761429	0.433761	0.485813	0.942502	0.632465	0.621874	0.325805
1	0.830497	0.731481	0.811888	0.427775	0.547163	0.916996	0.811888	0.515123	0.32142
1	0.830497	0.731481	0.811888	0.427775	0.547163	0.916996	0.811888	0.515123	0.325805
1	0.830497	0.731481	0.811888	0.433761	0.547163	0.916996	0.811888	0.515123	0.32142
1	0.811888	0.746129	0.830497	0.45237	0.53077	0.916996	0.621874	0.45237	0.308592
1	0.811888	0.746129	0.830497	0.458804	0.53077	0.916996	0.621874	0.439853	0.300298
1	0.761429	0.746129	0.77744	0	0.654678	0.942502	0.343924	0.416107	0.268987
1	0.794233	0.761429	0.77744	0.427775	0.472043	0.942502	0.632465	0.621874	0.339304
1	0.830497	0.761429	0.811888	0.427775	0.53077	0.916996	0.601621	0.439853	0.343924
1	0.830497	0.746129	0.811888	0.410418	0.555662	0.916996	0.621874	0.46536	0.325805
1	0.811888	0.746129	0.830497	0.439853	0.53077	0.916996	0.611599	0.45237	0.317091
1	0.77744	0.666346	0.478859	0	0.458804	0.916996	0.794233	0.522858	0.276551
1	0.794233	0.761429	0.761429	0.439853	0.478859	0.916996	0.632465	0.632465	0.330246
1	0.830497	0.746129	0.811888	0.410418	0.555662	0.916996	0.621874	0.46536	0.325805
1	0.830497	0.731481	0.811888	0.427775	0.547163	0.916996	0.811888	0.515123	0.32142
1	0.830497	0.746129	0.794233	0.410418	0.555662	0.916996	0.621874	0.472043	0.317091
1	0.830497	0.761429	0.811888	0.421891	0.53077	0.916996	0.601621	0.446055	0.353354
1	0.794233	0.77744	0.77744	0.427775	0.485813	0.916996	0.632465	0.632465	0.334745
1	0.830497	0.731481	0.811888	0.427775	0.547163	0.916996	0.811888	0.522858	0.32142
1	0.830497	0.761429	0.811888	0.416107	0.538869	0.916996	0.611599	0.439853	0.348607
1	0.761429	0.746129	0.77744	0	0.654678	0.942502	0.348607	0.421891	0.268987
1	0.794233	0.761429	0.77744	0.427775	0.478859	0.942502	0.632465	0.621874	0.334745
1	0.830497	0.761429	0.811888	0.427775	0.53077	0.916996	0.601621	0.439853	0.353354
1	0.77744	0.761429	0.77744	0	0.643392	0.942502	0.339304	0.421891	0.265266
1	0.830497	0.731481	0.811888	0.427775	0.547163	0.916996	0.811888	0.515123	0.32142
1	0.830497	0.761429	0.811888	0.421891	0.53077	0.916996	0.601621	0.439853	0.353354
1	0.746129	0.731481	0.77744	0	0.666346	0.916996	0.348607	0.421891	0.254338
1	0.77744	0.761429	0.77744	0	0.643392	0.916996	0.334745	0.416107	0.272748
1	0.77744	0.761429	0.77744	0	0.643392	0.942502	0.334745	0.421891	0.265266
1	0.811888	0.746129	0.811888	0.458804	0.53077	0.916996	0.621874	0.446055	0.300298
1	0.811888	0.746129	0.830497	0.458804	0.53077	0.916996	0.621874	0.446055	0.30442
1	0.77744	0.666346	0.472043	0	0.46536	0.916996	0.794233	0.522858	0.28822
1	0.77744	0.666346	0.472043	0	0.472043	0.916996	0.794233	0.53077	0.28822
1	0.811888	0.746129	0.830497	0.45237	0.53077	0.916996	0.621874	0.446055	0.308592
1	0.811888	0.746129	0.811888	0.458804	0.53077	0.916996	0.621874	0.446055	0.300298
1	0.77744	0.666346	0.478859	0	0.472043	0.916996	0.794233	0.53077	0.284286
1	0.830497	0.77744	0.811888	0.427775	0.522858	0.916996	0.601621	0.439853	0.353354
1	0.811888	0.746129	0.830497	0.458804	0.53077	0.916996	0.621874	0.446055	0.30442
1	0.77744	0.77744	0.77744	0	0.643392	0.942502	0.339304	0.421891	0.261584
1	0.794233	0.761429	0.761429	0.433761	0.485813	0.942502	0.632465	0.621874	0.32142
1	0.811888	0.761429	0.811888	0.427775	0.538869	0.916996	0.611599	0.439853	0.348607
1	0.746129	0.746129	0.794233	0	0.643392	0.916996	0.330246	0.427775	0.254338
1	0.811888	0.746129	0.830497	0.439853	0.538869	0.916996	0.611599	0.458804	0.317091
1	0.761429	0.746129	0.77744	0	0.643392	0.916996	0.334745	0.427775	0.254338
1	0.746129	0.731481	0.77744	0	0.654678	0.916996	0.339304	0.416107	0.257942
1	0.811888	0.746129	0.830497	0.458804	0.53077	0.916996	0.621874	0.446055	0.300298
1	0.830497	0.731481	0.811888	0.427775	0.547163	0.916996	0.811888	0.515123	0.32142
1	0.830497	0.746129	0.811888	0.410418	0.555662	0.916996	0.621874	0.472043	0.32142
1	0.794233	0.77744	0.77744	0	0.643392	0.942502	0.343924	0.427775	0.268987
1	0.830497	0.746129	0.811888	0.404821	0.555662	0.916996	0.621874	0.472043	0.317091
1	0.811888	0.746129	0.811888	0.458804	0.53077	0.916996	0.621874	0.446055	0.300298
1	0.77744	0.666346	0.478859	0	0.458804	0.916996	0.794233	0.522858	0.280397
1	0.830497	0.731481	0.811888	0.427775	0.547163	0.916996	0.811888	0.515123	0.317091
1	0.811888	0.761429	0.811888	0.421891	0.538869	0.916996	0.611599	0.439853	0.348607
1	0.761429	0.746129	0.77744	0	0.643392	0.916996	0.339304	0.416107	0.247241
1	0.830497	0.761429	0.811888	0.421891	0.538869	0.916996	0.611599	0.439853	0.348607
1	0.830497	0.731481	0.811888	0.433761	0.547163	0.916996	0.811888	0.515123	0.317091
1	0.794233	0.77744	0.77744	0.421891	0.472043	0.942502	0.632465	0.632465	0.339304
1	0.830497	0.746129	0.811888	0.410418	0.555662	0.916996	0.621874	0.46536	0.325805
1	0.794233	0.761429	0.77744	0.433761	0.478859	0.942502	0.643392	0.621874	0.339304
1	0.77744	0.666346	0.478859	0	0.46536	0.916996	0.794233	0.53077	0.284286
1	0.811888	0.746129	0.830497	0.439853	0.53077	0.916996	0.611599	0.45237	0.317091
1	0.77744	0.666346	0.478859	0	0.472043	0.916996	0.794233	0.53077	0.28822
1	0.77744	0.666346	0.472043	0	0.472043	0.916996	0.794233	0.53077	0.28822
1	0.811888	0.746129	0.830497	0.439853	0.538869	0.916996	0.611599	0.458804	0.312815
1	0.830497	0.761429	0.811888	0.427775	0.53077	0.916996	0.601621	0.439853	0.353354
1	0.811888	0.746129	0.830497	0.458804	0.53077	0.916996	0.621874	0.446055	0.30442
1	0.830497	0.731481	0.811888	0.427775	0.547163	0.916996	0.811888	0.522858	0.32142
1	0.830497	0.746129	0.811888	0.410418	0.555662	0.916996	0.621874	0.46536	0.325805
1	0.77744	0.666346	0.478859	0	0.472043	0.916996	0.794233	0.53077	0.28822
1	0.811888	0.746129	0.830497	0.446055	0.53077	0.916996	0.611599	0.446055	0.317091
1	0.77744	0.666346	0.472043	0	0.472043	0.916996	0.794233	0.53077	0.28822
1	0.811888	0.746129	0.830497	0.458804	0.53077	0.916996	0.621874	0.446055	0.30442
1	0.811888	0.761429	0.811888	0.421891	0.538869	0.916996	0.611599	0.446055	0.343924
1	0.77744	0.666346	0.478859	0	0.472043	0.916996	0.794233	0.53077	0.284286
1	0.794233	0.761429	0.761429	0.439853	0.478859	0.942502	0.632465	0.632465	0.330246
1	0.77744	0.761429	0.77744	0	0.643392	0.916996	0.334745	0.416107	0.268987
1	0.830497	0.731481	0.811888	0.427775	0.547163	0.916996	0.811888	0.515123	0.325805
1	0.77744	0.666346	0.472043	0	0.472043	0.916996	0.794233	0.53077	0.28822
1	0.830497	0.731481	0.811888	0.427775	0.547163	0.916996	0.811888	0.515123	0.325805
1	0.746129	0.746129	0.77744	0	0.654678	0.916996	0.339304	0.421891	0.254338
1	0.830497	0.77744	0.811888	0.427775	0.53077	0.916996	0.601621	0.439853	0.353354
1	0.77744	0.666346	0.478859	0	0.472043	0.916996	0.794233	0.53077	0.28822
1	0.77744	0.666346	0.472043	0	0.458804	0.916996	0.794233	0.522858	0.280397
1	0.794233	0.77744	0.77744	0.427775	0.472043	0.942502	0.632465	0.632465	0.343924
1	0.77744	0.666346	0.472043	0	0.46536	0.916996	0.794233	0.53077	0.280397
1	0.830497	0.746129	0.811888	0.410418	0.555662	0.916996	0.621874	0.46536	0.325805
1	0.761429	0.746129	0.77744	0	0.654678	0.942502	0.343924	0.416107	0.268987
1	0.794233	0.761429	0.77744	0.427775	0.485813	0.942502	0.632465	0.621874	0.330246
1	0.811888	0.746129	0.830497	0.439853	0.538869	0.916996	0.611599	0.458804	0.317091
1	0.746129	0.746129	0.77744	0	0.643392	0.916996	0.339304	0.421891	0.250771
1	0.77744	0.666346	0.472043	0	0.472043	0.916996	0.794233	0.53077	0.28822
1	0.830497	0.731481	0.811888	0.433761	0.547163	0.916996	0.811888	0.522858	0.32142
1	0.77744	0.761429	0.77744	0	0.643392	0.916996	0.339304	0.421891	0.268987
1	0.77744	0.666346	0.472043	0	0.46536	0.916996	0.794233	0.53077	0.28822
1	0.77744	0.666346	0.472043	0	0.46536	0.916996	0.794233	0.522858	0.284286
1	0.77744	0.666346	0.472043	0	0.46536	0.916996	0.794233	0.522858	0.28822
1	0.77744	0.666346	0.478859	0	0.472043	0.916996	0.794233	0.53077	0.284286
1	0.830497	0.746129	0.811888	0.410418	0.555662	0.916996	0.621874	0.46536	0.325805
1	0.794233	0.761429	0.761429	0.439853	0.478859	0.942502	0.632465	0.632465	0.325805
1	0.830497	0.731481	0.811888	0.427775	0.547163	0.916996	0.811888	0.522858	0.325805
1	0.77744	0.666346	0.472043	0	0.46536	0.916996	0.794233	0.522858	0.280397
1	0.811888	0.746129	0.830497	0.458804	0.53077	0.916996	0.621874	0.446055	0.30442
1	0.77744	0.666346	0.478859	0	0.472043	0.916996	0.794233	0.53077	0.284286
1	0.77744	0.666346	0.478859	0	0.472043	0.916996	0.794233	0.53077	0.28822
1	0.77744	0.77744	0.77744	0	0.643392	0.942502	0.339304	0.421891	0.257942
1	0.811888	0.746129	0.811888	0.458804	0.53077	0.916996	0.621874	0.446055	0.300298
1	0.746129	0.746129	0.77744	0	0.654678	0.916996	0.339304	0.421891	0.250771
1	0.77744	0.761429	0.77744	0	0.643392	0.942502	0.343924	0.416107	0.250771
1	0.830497	0.731481	0.811888	0.427775	0.547163	0.916996	0.811888	0.522858	0.32142
1	0.830497	0.746129	0.811888	0.410418	0.555662	0.916996	0.621874	0.46536	0.330246
1	0.811888	0.746129	0.830497	0.458804	0.53077	0.916996	0.621874	0.446055	0.30442
1	0.794233	0.761429	0.77744	0.433761	0.478859	0.942502	0.643392	0.621874	0.339304
1	0.811888	0.746129	0.830497	0.458804	0.53077	0.916996	0.621874	0.439853	0.30442
1	0.830497	0.761429	0.811888	0.416107	0.538869	0.916996	0.611599	0.439853	0.348607
1	0.746129	0.746129	0.77744	0	0.654678	0.916996	0.334745	0.416107	0.254338
1	0.794233	0.761429	0.77744	0.433761	0.485813	0.916996	0.632465	0.621874	0.339304
1	0.761429	0.746129	0.77744	0	0.654678	0.942502	0.343924	0.421891	0.265266
1	0.794233	0.761429	0.77744	0.433761	0.478859	0.916996	0.643392	0.621874	0.339304
1	0.794233	0.77744	0.77744	0.427775	0.478859	0.916996	0.632465	0.632465	0.334745
1	0.811888	0.761429	0.761429	0.427775	0.485813	0.942502	0.632465	0.621874	0.325805
1	0.811888	0.746129	0.830497	0.439853	0.53077	0.916996	0.621874	0.45237	0.317091
1	0.830497	0.731481	0.811888	0.433761	0.547163	0.916996	0.811888	0.515123	0.32142
1	0.811888	0.761429	0.761429	0.433761	0.485813	0.942502	0.632465	0.621874	0.325805
1	0.811888	0.746129	0.811888	0.458804	0.53077	0.916996	0.621874	0.446055	0.300298
1	0.811888	0.761429	0.811888	0.421891	0.538869	0.916996	0.611599	0.446055	0.348607
1	0.811888	0.746129	0.830497	0.439853	0.53077	0.916996	0.611599	0.45237	0.312815
1	0.77744	0.666346	0.472043	0	0.46536	0.916996	0.794233	0.522858	0.28822
1	0.794233	0.77744	0.77744	0.421891	0.472043	0.942502	0.632465	0.632465	0.339304
1	0.811888	0.761429	0.761429	0.427775	0.485813	0.916996	0.632465	0.621874	0.32142
1	0.794233	0.77744	0.77744	0.421891	0.458804	0.916996	0.632465	0.621874	0.334745
1	0.830497	0.731481	0.811888	0.433761	0.547163	0.916996	0.811888	0.515123	0.317091
1	0.77744	0.77744	0.77744	0	0.643392	0.942502	0.334745	0.421891	0.268987
1	0.811888	0.761429	0.761429	0.427775	0.485813	0.942502	0.632465	0.621874	0.32142
1	0.811888	0.746129	0.830497	0.439853	0.53077	0.916996	0.611599	0.45237	0.317091
1	0.830497	0.731481	0.811888	0.427775	0.547163	0.916996	0.811888	0.522858	0.325805
1	0.794233	0.77744	0.77744	0	0.643392	0.942502	0.343924	0.421891	0.268987
1	0.761429	0.746129	0.77744	0	0.654678	0.942502	0.343924	0.421891	0.265266
1	0.811888	0.761429	0.811888	0.427775	0.538869	0.916996	0.611599	0.446055	0.348607
1	0.830497	0.77744	0.811888	0.421891	0.53077	0.916996	0.601621	0.439853	0.353354
1	0.830497	0.746129	0.811888	0.410418	0.555662	0.916996	0.621874	0.46536	0.325805
1	0.746129	0.746129	0.77744	0	0.643392	0.916996	0.339304	0.421891	0.250771
1	0.794233	0.761429	0.77744	0.433761	0.478859	0.942502	0.643392	0.621874	0.339304
1	0.77744	0.77744	0.77744	0	0.643392	0.942502	0.334745	0.416107	0.268987
1	0.811888	0.746129	0.830497	0.458804	0.53077	0.916996	0.621874	0.446055	0.30442
1	0.830497	0.746129	0.811888	0.410418	0.555662	0.916996	0.621874	0.46536	0.330246
1	0.830497	0.731481	0.811888	0.433761	0.547163	0.916996	0.811888	0.515123	0.317091
1	0.830497	0.77744	0.811888	0.421891	0.522858	0.916996	0.601621	0.439853	0.348607
1	0.77744	0.666346	0.478859	0	0.472043	0.916996	0.794233	0.53077	0.284286
1	0.746129	0.746129	0.77744	0	0.654678	0.916996	0.334745	0.421891	0.257942
1	0.811888	0.761429	0.811888	0.421891	0.538869	0.916996	0.611599	0.439853	0.353354
1	0.830497	0.746129	0.794233	0.404821	0.555662	0.916996	0.621874	0.472043	0.317091
1	0.811888	0.746129	0.830497	0.439853	0.538869	0.916996	0.611599	0.458804	0.317091
1	0.830497	0.746129	0.811888	0.410418	0.555662	0.916996	0.621874	0.472043	0.32142
1	0.761429	0.761429	0.77744	0	0.643392	0.916996	0.343924	0.416107	0.265266
1	0.830497	0.761429	0.811888	0.421891	0.53077	0.916996	0.601621	0.439853	0.348607
1	0.830497	0.746129	0.794233	0.404821	0.555662	0.916996	0.621874	0.472043	0.317091
1	0.830497	0.746129	0.811888	0.410418	0.555662	0.916996	0.621874	0.46536	0.325805
1	0.811888	0.746129	0.830497	0.45237	0.53077	0.916996	0.621874	0.446055	0.30442
1	0.811888	0.761429	0.811888	0.427775	0.538869	0.916996	0.611599	0.439853	0.348607
1	0.746129	0.746129	0.77744	0	0.666346	0.916996	0.334745	0.416107	0.250771
1	0.830497	0.77744	0.811888	0.421891	0.53077	0.916996	0.601621	0.439853	0.353354
1	0.811888	0.746129	0.830497	0.439853	0.538869	0.916996	0.611599	0.458804	0.312815
1	0.77744	0.666346	0.478859	0	0.472043	0.916996	0.794233	0.53077	0.28822
1	0.746129	0.746129	0.77744	0	0.654678	0.942502	0.339304	0.421891	0.247241
1	0.830497	0.746129	0.811888	0.410418	0.555662	0.916996	0.621874	0.472043	0.317091
1	0.746129	0.746129	0.794233	0	0.643392	0.916996	0.330246	0.421891	0.250771
1	0.77744	0.666346	0.478859	0	0.472043	0.916996	0.794233	0.53077	0.284286
1	0.830497	0.761429	0.811888	0.421891	0.538869	0.916996	0.611599	0.439853	0.348607
1	0.811888	0.746129	0.830497	0.439853	0.538869	0.916996	0.611599	0.458804	0.312815
1	0.77744	0.666346	0.472043	0	0.46536	0.916996	0.794233	0.522858	0.28822
1	0.794233	0.761429	0.761429	0.439853	0.478859	0.916996	0.632465	0.632465	0.330246
1	0.830497	0.746129	0.811888	0.410418	0.555662	0.916996	0.621874	0.472043	0.32142
1	0.77744	0.77744	0.77744	0	0.643392	0.942502	0.334745	0.421891	0.261584
1	0.830497	0.761429	0.811888	0.421891	0.53077	0.916996	0.601621	0.439853	0.353354
1	0.811888	0.761429	0.811888	0.427775	0.538869	0.916996	0.611599	0.446055	0.348607
1	0.794233	0.761429	0.77744	0.427775	0.478859	0.942502	0.632465	0.621874	0.330246
1	0.830497	0.746129	0.811888	0.410418	0.555662	0.916996	0.621874	0.46536	0.330246
1	0.794233	0.77744	0.77744	0.427775	0.478859	0.916996	0.632465	0.632465	0.339304
1	0.761429	0.761429	0.77744	0	0.643392	0.942502	0.343924	0.421891	0.261584
1	0.830497	0.746129	0.811888	0.410418	0.555662	0.916996	0.621874	0.46536	0.325805
1	0.830497	0.731481	0.811888	0.433761	0.547163	0.916996	0.811888	0.515123	0.317091
1	0.830497	0.761429	0.811888	0.410418	0.53077	0.916996	0.601621	0.433761	0.343924
1	0.811888	0.746129	0.830497	0.45237	0.53077	0.916996	0.621874	0.446055	0.308592
1	0.794233	0.77744	0.77744	0	0.643392	0.942502	0.343924	0.421891	0.268987
1	0.794233	0.761429	0.77744	0.433761	0.485813	0.942502	0.643392	0.621874	0.339304
1	0.811888	0.746129	0.830497	0.439853	0.538869	0.916996	0.611599	0.458804	0.317091
1	0.830497	0.761429	0.811888	0.421891	0.53077	0.916996	0.601621	0.439853	0.353354
1	0.794233	0.77744	0.77744	0.427775	0.46536	0.916996	0.632465	0.632465	0.334745
1	0.794233	0.761429	0.761429	0.433761	0.478859	0.942502	0.632465	0.632465	0.325805
1	0.830497	0.761429	0.811888	0.421891	0.53077	0.916996	0.601621	0.439853	0.353354
1	0.830497	0.746129	0.811888	0.410418	0.555662	0.916996	0.621874	0.472043	0.317091
1	0.77744	0.666346	0.478859	0	0.472043	0.916996	0.794233	0.53077	0.28822
1	0.830497	0.746129	0.811888	0.410418	0.555662	0.916996	0.621874	0.472043	0.325805
1	0.794233	0.761429	0.77744	0.433761	0.478859	0.942502	0.643392	0.621874	0.343924
1	0.794233	0.761429	0.77744	0.433761	0.478859	0.942502	0.643392	0.621874	0.343924
1	0.794233	0.77744	0.77744	0.421891	0.472043	0.916996	0.621874	0.632465	0.334745
1	0.830497	0.731481	0.811888	0.433761	0.547163	0.916996	0.811888	0.515123	0.32142
1	0.77744	0.666346	0.472043	0	0.46536	0.916996	0.794233	0.522858	0.284286
1	0.830497	0.761429	0.811888	0.416107	0.53077	0.916996	0.601621	0.433761	0.343924
1	0.830497	0.746129	0.811888	0.410418	0.555662	0.916996	0.621874	0.472043	0.317091
1	0.830497	0.746129	0.811888	0.410418	0.555662	0.916996	0.621874	0.46536	0.325805
1	0.794233	0.761429	0.761429	0.433761	0.485813	0.942502	0.632465	0.621874	0.32142
1	0.811888	0.746129	0.830497	0.458804	0.53077	0.916996	0.621874	0.446055	0.300298
1	0.830497	0.746129	0.811888	0.410418	0.555662	0.916996	0.621874	0.46536	0.32142
1	0.811888	0.746129	0.830497	0.439853	0.53077	0.916996	0.611599	0.45237	0.317091
1	0.811888	0.746129	0.811888	0.458804	0.53077	0.916996	0.621874	0.446055	0.300298
1	0.746129	0.746129	0.77744	0	0.654678	0.916996	0.339304	0.421891	0.257942
1	0.830497	0.746129	0.811888	0.410418	0.555662	0.916996	0.621874	0.46536	0.330246
1	0.830497	0.746129	0.811888	0.410418	0.555662	0.916996	0.621874	0.46536	0.325805
1	0.830497	0.746129	0.811888	0.410418	0.555662	0.916996	0.621874	0.472043	0.32142
1	0.830497	0.746129	0.811888	0.404821	0.555662	0.916996	0.621874	0.472043	0.317091
1	0.77744	0.666346	0.472043	0	0.472043	0.916996	0.794233	0.522858	0.28822
1	0.830497	0.746129	0.811888	0.410418	0.555662	0.916996	0.621874	0.46536	0.325805
1	0.830497	0.761429	0.811888	0.421891	0.538869	0.916996	0.611599	0.439853	0.348607
1	0.794233	0.77744	0.77744	0.427775	0.478859	0.916996	0.632465	0.632465	0.339304
1	0.77744	0.666346	0.472043	0	0.46536	0.916996	0.794233	0.53077	0.28822
1	0.811888	0.746129	0.811888	0.458804	0.53077	0.916996	0.621874	0.446055	0.300298
1	0.830497	0.731481	0.811888	0.427775	0.547163	0.916996	0.811888	0.515123	0.32142
1	0.794233	0.761429	0.77744	0.427775	0.485813	0.942502	0.632465	0.621874	0.339304
1	0.830497	0.731481	0.811888	0.427775	0.547163	0.916996	0.811888	0.515123	0.325805
1	0.77744	0.666346	0.472043	0	0.46536	0.916996	0.794233	0.522858	0.284286
1	0.830497	0.731481	0.811888	0.427775	0.547163	0.916996	0.811888	0.515123	0.32142
1	0.77744	0.666346	0.478859	0	0.46536	0.916996	0.794233	0.53077	0.280397
1	0.830497	0.731481	0.811888	0.427775	0.547163	0.916996	0.811888	0.515123	0.32142
1	0.811888	0.746129	0.830497	0.439853	0.53077	0.916996	0.621874	0.45237	0.317091
1	0.794233	0.761429	0.77744	0	0.643392	0.942502	0.343924	0.421891	0.268987
1	0.77744	0.666346	0.478859	0	0.458804	0.916996	0.794233	0.522858	0.280397
1	0.830497	0.731481	0.811888	0.427775	0.547163	0.916996	0.811888	0.515123	0.325805
1	0.830497	0.731481	0.811888	0.427775	0.547163	0.916996	0.811888	0.515123	0.317091
1	0.811888	0.761429	0.811888	0.427775	0.538869	0.916996	0.611599	0.446055	0.339304
1	0.794233	0.761429	0.77744	0.433761	0.478859	0.942502	0.643392	0.621874	0.339304
1	0.811888	0.746129	0.830497	0.439853	0.53077	0.916996	0.621874	0.446055	0.317091
1	0.830497	0.746129	0.794233	0.404821	0.555662	0.916996	0.621874	0.472043	0.317091
1	0.77744	0.77744	0.77744	0	0.643392	0.942502	0.339304	0.410418	0.268987
1	0.830497	0.746129	0.811888	0.410418	0.555662	0.916996	0.621874	0.472043	0.32142
1	0.746129	0.746129	0.77744	0	0.654678	0.916996	0.343924	0.421891	0.250771
1	0.77744	0.666346	0.472043	0	0.46536	0.916996	0.794233	0.522858	0.284286
1	0.77744	0.666346	0.472043	0	0.472043	0.916996	0.794233	0.53077	0.28822
1	0.746129	0.746129	0.77744	0	0.654678	0.916996	0.343924	0.421891	0.243747
1	0.811888	0.761429	0.811888	0.421891	0.538869	0.916996	0.611599	0.439853	0.348607
1	0.746129	0.746129	0.77744	0	0.654678	0.916996	0.334745	0.421891	0.254338
1	0.794233	0.77744	0.77744	0.427775	0.478859	0.916996	0.632465	0.632465	0.339304
1	0.794233	0.77744	0.77744	0.427775	0.478859	0.916996	0.632465	0.632465	0.334745
1	0.830497	0.731481	0.811888	0.427775	0.547163	0.916996	0.811888	0.515123	0.32142
1	0.794233	0.77744	0.77744	0.427775	0.485813	0.916996	0.632465	0.632465	0.330246
1	0.77744	0.77744	0.77744	0	0.643392	0.942502	0.339304	0.421891	0.276551
1	0.794233	0.77744	0.77744	0	0.643392	0.942502	0.339304	0.416107	0.265266
1	0.811888	0.761429	0.811888	0.427775	0.538869	0.916996	0.611599	0.446055	0.348607
1	0.746129	0.746129	0.77744	0	0.654678	0.942502	0.339304	0.427775	0.257942
1	0.811888	0.746129	0.830497	0.439853	0.538869	0.916996	0.611599	0.458804	0.312815
1	0.811888	0.761429	0.761429	0.433761	0.485813	0.942502	0.632465	0.632465	0.32142
1	0.811888	0.746129	0.830497	0.439853	0.53077	0.916996	0.611599	0.45237	0.317091
1	0.77744	0.666346	0.478859	0	0.46536	0.916996	0.794233	0.53077	0.284286
1	0.77744	0.666346	0.478859	0	0.46536	0.916996	0.794233	0.522858	0.284286
1	0.811888	0.761429	0.811888	0.421891	0.538869	0.916996	0.611599	0.439853	0.353354
1	0.830497	0.746129	0.811888	0.410418	0.555662	0.916996	0.621874	0.472043	0.325805
1	0.794233	0.761429	0.761429	0.439853	0.478859	0.942502	0.632465	0.632465	0.325805
1	0.77744	0.77744	0.77744	0	0.643392	0.942502	0.339304	0.410418	0.268987
1	0.811888	0.746129	0.830497	0.439853	0.538869	0.916996	0.611599	0.458804	0.312815
1	0.811888	0.746129	0.830497	0.439853	0.538869	0.916996	0.611599	0.458804	0.312815
1	0.830497	0.731481	0.811888	0.433761	0.547163	0.916996	0.811888	0.515123	0.317091
1	0.77744	0.666346	0.472043	0	0.472043	0.916996	0.794233	0.53077	0.28822
1	0.794233	0.761429	0.77744	0.421891	0.46536	0.916996	0.632465	0.632465	0.334745
1	0.830497	0.746129	0.811888	0.410418	0.555662	0.916996	0.621874	0.472043	0.32142
1	0.830497	0.746129	0.811888	0.410418	0.555662	0.916996	0.621874	0.472043	0.325805
1	0.811888	0.746129	0.830497	0.439853	0.53077	0.916996	0.611599	0.45237	0.317091
1	0.77744	0.666346	0.478859	0	0.46536	0.916996	0.794233	0.53077	0.280397
1	0.811888	0.746129	0.830497	0.439853	0.538869	0.916996	0.611599	0.458804	0.312815
1	0.77744	0.77744	0.77744	0	0.643392	0.942502	0.334745	0.421891	0.272748
1	0.811888	0.761429	0.811888	0.427775	0.538869	0.916996	0.611599	0.446055	0.343924
1	0.794233	0.761429	0.77744	0.427775	0.472043	0.916996	0.632465	0.621874	0.334745
1	0.830497	0.746129	0.811888	0.410418	0.555662	0.916996	0.621874	0.46536	0.325805
1	0.811888	0.746129	0.830497	0.45237	0.53077	0.916996	0.621874	0.45237	0.308592
1	0.811888	0.746129	0.811888	0.458804	0.53077	0.916996	0.621874	0.446055	0.300298
1	0.746129	0.746129	0.794233	0	0.643392	0.916996	0.334745	0.421891	0.257942
1	0.811888	0.761429	0.761429	0.427775	0.485813	0.916996	0.632465	0.621874	0.32142
1	0.830497	0.731481	0.811888	0.433761	0.547163	0.916996	0.811888	0.515123	0.32142
1	0.77744	0.666346	0.472043	0	0.46536	0.916996	0.794233	0.522858	0.28822
1	0.811888	0.746129	0.830497	0.439853	0.538869	0.916996	0.611599	0.458804	0.312815
1	0.830497	0.731481	0.811888	0.433761	0.547163	0.916996	0.811888	0.515123	0.32142
1	0.811888	0.761429	0.811888	0.427775	0.538869	0.916996	0.611599	0.446055	0.339304
1	0.794233	0.761429	0.77744	0.433761	0.485813	0.942502	0.643392	0.621874	0.339304
1	0.830497	0.746129	0.811888	0.410418	0.555662	0.916996	0.621874	0.46536	0.325805
1	0.77744	0.666346	0.472043	0	0.472043	0.916996	0.794233	0.53077	0.28822
1	0.830497	0.746129	0.811888	0.410418	0.555662	0.916996	0.621874	0.472043	0.32142
1	0.794233	0.761429	0.761429	0.439853	0.478859	0.942502	0.632465	0.632465	0.325805
1	0.811888	0.746129	0.830497	0.446055	0.53077	0.916996	0.621874	0.446055	0.317091
1	0.761429	0.746129	0.794233	0	0.643392	0.916996	0.339304	0.416107	0.254338
1	0.794233	0.77744	0.77744	0.421891	0.472043	0.916996	0.632465	0.632465	0.334745
1	0.830497	0.746129	0.811888	0.410418	0.555662	0.916996	0.621874	0.46536	0.325805
1	0.811888	0.746129	0.811888	0.458804	0.53077	0.916996	0.621874	0.446055	0.300298
1	0.830497	0.746129	0.811888	0.404821	0.555662	0.916996	0.621874	0.46536	0.32142
1	0.794233	0.77744	0.77744	0	0.643392	0.942502	0.334745	0.427775	0.280397
1	0.830497	0.746129	0.811888	0.410418	0.555662	0.916996	0.621874	0.46536	0.325805
1	0.830497	0.746129	0.811888	0.410418	0.555662	0.916996	0.621874	0.46536	0.325805
1	0.811888	0.746129	0.830497	0.439853	0.53077	0.916996	0.621874	0.45237	0.317091
1	0.746129	0.746129	0.77744	0	0.654678	0.916996	0.343924	0.421891	0.247241
1	0.830497	0.761429	0.811888	0.421891	0.53077	0.916996	0.601621	0.439853	0.353354
1	0.77744	0.666346	0.472043	0	0.472043	0.916996	0.794233	0.522858	0.28822
1	0.746129	0.731481	0.77744	0	0.654678	0.916996	0.343924	0.416107	0.254338
1	0.746129	0.746129	0.77744	0	0.654678	0.916996	0.339304	0.421891	0.254338
1	0.811888	0.761429	0.811888	0.427775	0.538869	0.916996	0.611599	0.439853	0.339304
1	0.794233	0.761429	0.761429	0.433761	0.485813	0.942502	0.632465	0.621874	0.325805
1	0.830497	0.746129	0.811888	0.410418	0.555662	0.916996	0.621874	0.46536	0.325805
1	0.811888	0.746129	0.830497	0.439853	0.538869	0.916996	0.611599	0.458804	0.317091
1	0.794233	0.77744	0.77744	0.427775	0.485813	0.916996	0.632465	0.621874	0.334745
1	0.830497	0.761429	0.811888	0.427775	0.53077	0.916996	0.601621	0.446055	0.353354
1	0.830497	0.761429	0.811888	0.410418	0.53077	0.916996	0.601621	0.433761	0.353354
1	0.830497	0.746129	0.811888	0.410418	0.555662	0.916996	0.621874	0.46536	0.325805
1	0.811888	0.761429	0.811888	0.427775	0.538869	0.916996	0.611599	0.446055	0.334745
1	0.77744	0.666346	0.478859	0	0.472043	0.916996	0.794233	0.53077	0.28822
1	0.830497	0.77744	0.811888	0.421891	0.53077	0.916996	0.601621	0.439853	0.348607
1	0.77744	0.666346	0.472043	0	0.46536	0.916996	0.794233	0.522858	0.28822
1	0.811888	0.761429	0.761429	0.433761	0.485813	0.942502	0.632465	0.621874	0.325805
1	0.830497	0.761429	0.811888	0.421891	0.53077	0.916996	0.601621	0.439853	0.353354
1	0.830497	0.746129	0.811888	0.410418	0.555662	0.916996	0.621874	0.472043	0.317091
1	0.830497	0.746129	0.811888	0.410418	0.555662	0.916996	0.621874	0.46536	0.325805
1	0.746129	0.746129	0.77744	0	0.654678	0.942502	0.343924	0.421891	0.247241
1	0.77744	0.666346	0.478859	0	0.472043	0.916996	0.794233	0.53077	0.28822
1	0.830497	0.746129	0.811888	0.410418	0.555662	0.916996	0.621874	0.472043	0.325805
1	0.811888	0.761429	0.761429	0.433761	0.485813	0.942502	0.632465	0.621874	0.32142
1	0.761429	0.746129	0.794233	0	0.643392	0.916996	0.334745	0.416107	0.254338
1	0.811888	0.746129	0.830497	0.458804	0.53077	0.916996	0.621874	0.446055	0.30442
1	0.830497	0.761429	0.811888	0.416107	0.538869	0.916996	0.611599	0.433761	0.353354
1	0.794233	0.761429	0.761429	0.433761	0.485813	0.942502	0.632465	0.621874	0.325805
1	0.794233	0.761429	0.761429	0.439853	0.478859	0.942502	0.632465	0.632465	0.325805
1	0.830497	0.746129	0.811888	0.410418	0.555662	0.916996	0.621874	0.472043	0.325805
1	0.830497	0.746129	0.811888	0.410418	0.555662	0.916996	0.621874	0.472043	0.32142
1	0.794233	0.761429	0.77744	0.427775	0.485813	0.916996	0.632465	0.621874	0.339304
1	0.830497	0.731481	0.811888	0.427775	0.547163	0.916996	0.811888	0.515123	0.325805
1	0.811888	0.761429	0.811888	0.427775	0.538869	0.916996	0.611599	0.446055	0.343924
1	0.761429	0.746129	0.77744	0	0.643392	0.916996	0.339304	0.421891	0.261584
1	0.77744	0.666346	0.472043	0	0.472043	0.916996	0.794233	0.53077	0.28822
1	0.77744	0.666346	0.472043	0	0.472043	0.916996	0.794233	0.53077	0.28822
1	0.830497	0.77744	0.811888	0.421891	0.53077	0.916996	0.601621	0.439853	0.353354
1	0.746129	0.746129	0.77744	0	0.654678	0.916996	0.343924	0.421891	0.243747
1	0.830497	0.746129	0.811888	0.410418	0.555662	0.916996	0.621874	0.46536	0.325805
1	0.830497	0.761429	0.811888	0.416107	0.53077	0.916996	0.601621	0.439853	0.353354
1	0.811888	0.761429	0.811888	0.427775	0.538869	0.916996	0.611599	0.446055	0.334745
1	0.811888	0.761429	0.811888	0.427775	0.538869	0.916996	0.611599	0.446055	0.343924
1	0.830497	0.731481	0.811888	0.433761	0.547163	0.916996	0.811888	0.515123	0.317091
1	0.811888	0.746129	0.830497	0.439853	0.538869	0.916996	0.611599	0.458804	0.312815
1	0.761429	0.761429	0.77744	0	0.643392	0.942502	0.330246	0.410418	0.268987
1	0.794233	0.761429	0.77744	0.433761	0.478859	0.942502	0.643392	0.621874	0.343924
1	0.811888	0.746129	0.830497	0.458804	0.53077	0.916996	0.621874	0.446055	0.308592
1	0.761429	0.761429	0.77744	0	0.643392	0.942502	0.343924	0.421891	0.261584
1	0.830497	0.746129	0.811888	0.410418	0.555662	0.916996	0.621874	0.472043	0.317091
1	0.77744	0.666346	0.478859	0	0.46536	0.916996	0.794233	0.53077	0.284286
1	0.830497	0.746129	0.811888	0.410418	0.555662	0.916996	0.621874	0.46536	0.325805
1	0.761429	0.746129	0.77744	0	0.643392	0.942502	0.343924	0.427775	0.268987
1	0.830497	0.746129	0.811888	0.410418	0.555662	0.916996	0.621874	0.472043	0.325805
1	0.77744	0.77744	0.77744	0	0.643392	0.942502	0.339304	0.421891	0.272748
1	0.77744	0.666346	0.472043	0	0.46536	0.916996	0.794233	0.53077	0.28822
1	0.830497	0.731481	0.811888	0.427775	0.547163	0.916996	0.811888	0.515123	0.32142
1	0.761429	0.746129	0.794233	0	0.643392	0.916996	0.339304	0.421891	0.247241
1	0.77744	0.666346	0.478859	0	0.46536	0.916996	0.794233	0.522858	0.280397
1	0.830497	0.731481	0.811888	0.427775	0.547163	0.916996	0.811888	0.515123	0.317091
1	0.830497	0.746129	0.811888	0.410418	0.555662	0.916996	0.621874	0.472043	0.317091
1	0.830497	0.731481	0.811888	0.433761	0.547163	0.916996	0.811888	0.515123	0.317091
1	0.830497	0.746129	0.811888	0.404821	0.555662	0.916996	0.621874	0.472043	0.32142
1	0.794233	0.77744	0.77744	0.427775	0.46536	0.916996	0.632465	0.621874	0.339304
1	0.830497	0.746129	0.811888	0.410418	0.555662	0.916996	0.621874	0.46536	0.325805
1	0.77744	0.666346	0.472043	0	0.46536	0.916996	0.794233	0.522858	0.28822
1	0.794233	0.77744	0.77744	0	0.643392	0.942502	0.334745	0.427775	0.276551
1	0.746129	0.746129	0.77744	0	0.654678	0.916996	0.334745	0.421891	0.250771
1	0.830497	0.731481	0.811888	0.433761	0.547163	0.916996	0.811888	0.515123	0.32142
1	0.746129	0.746129	0.77744	0	0.654678	0.916996	0.334745	0.421891	0.247241
1	0.746129	0.746129	0.77744	0	0.654678	0.916996	0.339304	0.416107	0.254338
1	0.830497	0.731481	0.811888	0.427775	0.547163	0.916996	0.811888	0.515123	0.32142
1	0.830497	0.731481	0.811888	0.427775	0.547163	0.916996	0.811888	0.515123	0.325805
1	0.811888	0.746129	0.830497	0.439853	0.53077	0.916996	0.611599	0.45237	0.317091
1	0.830497	0.731481	0.811888	0.427775	0.547163	0.916996	0.811888	0.515123	0.325805
1	0.830497	0.761429	0.811888	0.416107	0.538869	0.916996	0.611599	0.439853	0.348607
1	0.830497	0.746129	0.811888	0.410418	0.555662	0.916996	0.621874	0.46536	0.325805
1	0.794233	0.77744	0.77744	0.421891	0.485813	0.916996	0.632465	0.632465	0.330246
1	0.794233	0.77744	0.77744	0	0.643392	0.942502	0.334745	0.421891	0.268987
1	0.830497	0.746129	0.794233	0.404821	0.555662	0.916996	0.621874	0.472043	0.317091
1	0.794233	0.761429	0.77744	0.427775	0.472043	0.916996	0.632465	0.621874	0.334745
1	0.811888	0.746129	0.811888	0.458804	0.53077	0.916996	0.621874	0.446055	0.300298
1	0.830497	0.731481	0.811888	0.427775	0.555662	0.916996	0.811888	0.515123	0.32142
1	0.830497	0.731481	0.811888	0.427775	0.547163	0.916996	0.811888	0.515123	0.317091
1	0.811888	0.746129	0.830497	0.439853	0.53077	0.916996	0.621874	0.45237	0.317091
1	0.811888	0.746129	0.830497	0.458804	0.53077	0.916996	0.621874	0.446055	0.30442
1	0.811888	0.746129	0.830497	0.439853	0.538869	0.916996	0.611599	0.458804	0.312815
1	0.830497	0.761429	0.811888	0.410418	0.53077	0.916996	0.601621	0.433761	0.343924
1	0.794233	0.761429	0.761429	0.439853	0.478859	0.942502	0.632465	0.632465	0.325805
1	0.830497	0.731481	0.811888	0.433761	0.547163	0.916996	0.811888	0.515123	0.317091
1	0.811888	0.761429	0.811888	0.427775	0.538869	0.916996	0.611599	0.446055	0.348607
1	0.830497	0.731481	0.811888	0.427775	0.547163	0.916996	0.811888	0.515123	0.32142
1	0.77744	0.666346	0.472043	0	0.46536	0.916996	0.794233	0.522858	0.284286
1	0.77744	0.77744	0.77744	0	0.643392	0.942502	0.339304	0.421891	0.280397
1	0.77744	0.77744	0.77744	0	0.643392	0.942502	0.343924	0.416107	0.265266
1	0.830497	0.746129	0.811888	0.410418	0.555662	0.916996	0.621874	0.472043	0.32142
1	0.794233	0.761429	0.761429	0.439853	0.478859	0.942502	0.632465	0.632465	0.330246
1	0.830497	0.761429	0.811888	0.416107	0.538869	0.916996	0.611599	0.433761	0.348607
1	0.830497	0.746129	0.811888	0.404821	0.555662	0.916996	0.621874	0.472043	0.317091
1	0.830497	0.746129	0.811888	0.410418	0.555662	0.916996	0.621874	0.472043	0.317091
1	0.77744	0.666346	0.478859	0	0.458804	0.916996	0.794233	0.522858	0.280397
1	0.811888	0.746129	0.811888	0.458804	0.53077	0.916996	0.621874	0.446055	0.300298
1	0.811888	0.761429	0.811888	0.427775	0.538869	0.916996	0.611599	0.446055	0.343924
1	0.830497	0.761429	0.811888	0.416107	0.53077	0.916996	0.601621	0.439853	0.353354
1	0.77744	0.666346	0.478859	0	0.472043	0.916996	0.794233	0.53077	0.28822
1	0.794233	0.761429	0.77744	0.433761	0.485813	0.942502	0.643392	0.621874	0.339304
1	0.811888	0.746129	0.830497	0.458804	0.53077	0.916996	0.621874	0.446055	0.30442
1	0.77744	0.666346	0.472043	0	0.472043	0.916996	0.794233	0.53077	0.28822
1	0.811888	0.746129	0.830497	0.45237	0.53077	0.916996	0.621874	0.446055	0.308592
1	0.811888	0.746129	0.830497	0.439853	0.538869	0.916996	0.611599	0.458804	0.317091
1	0.811888	0.761429	0.811888	0.427775	0.538869	0.916996	0.611599	0.446055	0.343924
1	0.794233	0.77744	0.77744	0.421891	0.46536	0.916996	0.632465	0.632465	0.334745
1	0.77744	0.77744	0.77744	0	0.643392	0.942502	0.339304	0.421891	0.268987
1	0.761429	0.746129	0.77744	0	0.643392	0.942502	0.343924	0.427775	0.265266
1	0.830497	0.731481	0.811888	0.433761	0.547163	0.916996	0.811888	0.515123	0.317091
1	0.830497	0.746129	0.811888	0.410418	0.555662	0.916996	0.621874	0.46536	0.325805
1	0.830497	0.761429	0.811888	0.421891	0.53077	0.916996	0.601621	0.439853	0.348607
1	0.77744	0.666346	0.472043	0	0.472043	0.916996	0.794233	0.53077	0.28822
1	0.77744	0.666346	0.472043	0	0.46536	0.916996	0.794233	0.522858	0.28822
1	0.830497	0.746129	0.811888	0.410418	0.555662	0.916996	0.621874	0.472043	0.32142
1	0.811888	0.746129	0.830497	0.458804	0.53077	0.916996	0.621874	0.446055	0.30442
1	0.811888	0.746129	0.830497	0.439853	0.538869	0.916996	0.611599	0.458804	0.317091
1	0.830497	0.761429	0.811888	0.421891	0.53077	0.916996	0.601621	0.439853	0.348607
1	0.830497	0.731481	0.811888	0.427775	0.547163	0.916996	0.811888	0.515123	0.325805
1	0.77744	0.666346	0.472043	0	0.472043	0.916996	0.794233	0.53077	0.28822
1	0.77744	0.666346	0.472043	0	0.46536	0.916996	0.794233	0.522858	0.28822
1	0.830497	0.746129	0.811888	0.410418	0.555662	0.916996	0.621874	0.46536	0.325805
1	0.794233	0.77744	0.77744	0	0.643392	0.942502	0.339304	0.421891	0.265266
1	0.761429	0.746129	0.794233	0	0.643392	0.916996	0.339304	0.416107	0.250771
1	0.830497	0.746129	0.811888	0.410418	0.555662	0.916996	0.621874	0.46536	0.330246
1	0.794233	0.761429	0.761429	0.439853	0.478859	0.916996	0.632465	0.632465	0.330246
1	0.77744	0.666346	0.478859	0	0.472043	0.916996	0.794233	0.53077	0.284286
1	0.77744	0.77744	0.77744	0	0.643392	0.942502	0.339304	0.410418	0.268987
1	0.794233	0.77744	0.77744	0.421891	0.46536	0.916996	0.632465	0.632465	0.334745
1	0.811888	0.761429	0.811888	0.427775	0.538869	0.916996	0.611599	0.446055	0.348607
1	0.794233	0.761429	0.761429	0.433761	0.485813	0.942502	0.632465	0.621874	0.325805
1	0.77744	0.666346	0.478859	0	0.46536	0.916996	0.794233	0.53077	0.28822
1	0.761429	0.746129	0.77744	0	0.654678	0.942502	0.343924	0.416107	0.265266
1	0.77744	0.77744	0.77744	0	0.643392	0.942502	0.339304	0.416107	0.272748
1	0.811888	0.746129	0.830497	0.45237	0.53077	0.916996	0.621874	0.446055	0.308592
1	0.794233	0.77744	0.77744	0.421891	0.485813	0.916996	0.632465	0.621874	0.334745
1	0.811888	0.761429	0.811888	0.427775	0.538869	0.916996	0.611599	0.439853	0.334745
1	0.77744	0.666346	0.478859	0	0.46536	0.916996	0.794233	0.53077	0.284286
1	0.811888	0.761429	0.811888	0.427775	0.538869	0.916996	0.611599	0.446055	0.348607
1	0.811888	0.746129	0.830497	0.458804	0.53077	0.916996	0.621874	0.439853	0.30442
1	0.830497	0.731481	0.811888	0.427775	0.547163	0.916996	0.811888	0.515123	0.32142
1	0.830497	0.761429	0.811888	0.416107	0.53077	0.916996	0.601621	0.433761	0.343924
1	0.77744	0.77744	0.77744	0	0.643392	0.942502	0.339304	0.421891	0.257942
1	0.830497	0.731481	0.811888	0.433761	0.547163	0.916996	0.811888	0.515123	0.317091
1	0.794233	0.761429	0.77744	0.421891	0.46536	0.916996	0.632465	0.632465	0.334745
1	0.77744	0.77744	0.77744	0	0.643392	0.942502	0.339304	0.421891	0.268987
1	0.811888	0.746129	0.830497	0.439853	0.53077	0.916996	0.611599	0.458804	0.312815
1	0.811888	0.746129	0.830497	0.439853	0.53077	0.916996	0.611599	0.458804	0.312815
1	0.77744	0.666346	0.478859	0	0.46536	0.916996	0.794233	0.522858	0.280397
1	0.830497	0.77744	0.811888	0.427775	0.53077	0.916996	0.601621	0.439853	0.348607
1	0.811888	0.746129	0.830497	0.458804	0.53077	0.916996	0.621874	0.446055	0.30442
1	0.830497	0.746129	0.811888	0.410418	0.555662	0.916996	0.621874	0.472043	0.325805
1	0.830497	0.746129	0.811888	0.410418	0.555662	0.916996	0.621874	0.472043	0.325805
1	0.811888	0.746129	0.830497	0.439853	0.53077	0.916996	0.611599	0.45237	0.317091
1	0.794233	0.77744	0.77744	0.427775	0.485813	0.916996	0.632465	0.632465	0.330246
1	0.761429	0.761429	0.77744	0	0.643392	0.916996	0.334745	0.410418	0.268987
1	0.746129	0.746129	0.794233	0	0.643392	0.916996	0.339304	0.416107	0.247241
1	0.794233	0.761429	0.77744	0.433761	0.478859	0.942502	0.643392	0.621874	0.339304
1	0.811888	0.761429	0.811888	0.427775	0.538869	0.916996	0.611599	0.439853	0.348607
1	0.794233	0.761429	0.761429	0.433761	0.485813	0.942502	0.632465	0.621874	0.32142
1	0.811888	0.746129	0.830497	0.458804	0.53077	0.916996	0.621874	0.446055	0.30442
1	0.794233	0.77744	0.77744	0.427775	0.485813	0.916996	0.632465	0.621874	0.334745
1	0.830497	0.731481	0.811888	0.427775	0.547163	0.916996	0.811888	0.515123	0.317091
1	0.811888	0.746129	0.830497	0.439853	0.538869	0.916996	0.611599	0.458804	0.312815
1	0.830497	0.746129	0.794233	0.404821	0.555662	0.916996	0.621874	0.472043	0.317091
1	0.811888	0.761429	0.811888	0.421891	0.538869	0.916996	0.611599	0.439853	0.353354
1	0.830497	0.746129	0.811888	0.410418	0.555662	0.916996	0.621874	0.46536	0.325805
1	0.830497	0.731481	0.811888	0.427775	0.547163	0.916996	0.811888	0.515123	0.32142
1	0.830497	0.746129	0.811888	0.410418	0.555662	0.916996	0.621874	0.46536	0.325805
1	0.830497	0.746129	0.811888	0.410418	0.555662	0.916996	0.621874	0.46536	0.325805
1	0.794233	0.77744	0.77744	0.421891	0.472043	0.942502	0.632465	0.621874	0.339304
1	0.746129	0.731481	0.77744	0	0.654678	0.916996	0.343924	0.421891	0.257942
1	0.77744	0.666346	0.478859	0	0.46536	0.916996	0.794233	0.53077	0.284286
1	0.77744	0.666346	0.472043	0	0.472043	0.916996	0.794233	0.53077	0.28822
1	0.746129	0.746129	0.77744	0	0.643392	0.916996	0.339304	0.421891	0.250771
1	0.77744	0.666346	0.472043	0	0.472043	0.916996	0.794233	0.53077	0.28822
1	0.77744	0.666346	0.478859	0	0.46536	0.916996	0.794233	0.522858	0.280397
1	0.794233	0.761429	0.761429	0.433761	0.485813	0.942502	0.632465	0.621874	0.32142
1	0.794233	0.761429	0.761429	0.433761	0.485813	0.942502	0.632465	0.632465	0.325805
1	0.811888	0.746129	0.830497	0.439853	0.538869	0.916996	0.611599	0.458804	0.312815
1	0.746129	0.731481	0.77744	0	0.666346	0.916996	0.343924	0.421891	0.257942
1	0.794233	0.761429	0.77744	0.433761	0.478859	0.942502	0.643392	0.621874	0.339304
1	0.830497	0.746129	0.811888	0.410418	0.555662	0.916996	0.621874	0.46536	0.330246
1	0.794233	0.77744	0.77744	0	0.643392	0.942502	0.334745	0.416107	0.254338
1	0.830497	0.761429	0.811888	0.421891	0.53077	0.916996	0.601621	0.446055	0.353354
1	0.77744	0.761429	0.77744	0	0.643392	0.916996	0.339304	0.421891	0.268987
1	0.746129	0.746129	0.77744	0	0.654678	0.942502	0.343924	0.427775	0.257942
1	0.794233	0.77744	0.77744	0	0.643392	0.942502	0.343924	0.416107	0.265266
1	0.830497	0.761429	0.811888	0.416107	0.53077	0.916996	0.601621	0.433761	0.343924
1	0.830497	0.746129	0.811888	0.410418	0.555662	0.916996	0.621874	0.46536	0.325805
1	0.830497	0.731481	0.811888	0.427775	0.547163	0.916996	0.811888	0.515123	0.32142
1	0.830497	0.731481	0.811888	0.433761	0.547163	0.916996	0.811888	0.515123	0.32142
1	0.830497	0.746129	0.811888	0.410418	0.555662	0.916996	0.621874	0.472043	0.317091
1	0.830497	0.731481	0.811888	0.433761	0.547163	0.916996	0.811888	0.515123	0.317091
1	0.830497	0.746129	0.811888	0.410418	0.555662	0.916996	0.621874	0.472043	0.32142
1	0.746129	0.746129	0.794233	0	0.654678	0.916996	0.339304	0.416107	0.247241
1	0.830497	0.731481	0.811888	0.433761	0.547163	0.916996	0.811888	0.515123	0.317091
1	0.77744	0.666346	0.478859	0	0.472043	0.916996	0.794233	0.53077	0.28822
1	0.830497	0.761429	0.811888	0.421891	0.53077	0.916996	0.601621	0.439853	0.353354
1	0.811888	0.746129	0.811888	0.458804	0.53077	0.916996	0.621874	0.446055	0.300298
1	0.794233	0.77744	0.77744	0	0.643392	0.942502	0.339304	0.421891	0.265266
1	0.746129	0.731481	0.77744	0	0.666346	0.916996	0.339304	0.421891	0.261584
1	0.830497	0.77744	0.811888	0.421891	0.53077	0.916996	0.601621	0.439853	0.348607
1	0.811888	0.746129	0.811888	0.458804	0.53077	0.916996	0.621874	0.446055	0.300298
1	0.811888	0.746129	0.811888	0.458804	0.53077	0.916996	0.621874	0.446055	0.30442
1	0.746129	0.746129	0.794233	0	0.643392	0.916996	0.339304	0.416107	0.247241
1	0.830497	0.746129	0.811888	0.410418	0.555662	0.916996	0.621874	0.472043	0.317091
1	0.830497	0.731481	0.811888	0.427775	0.547163	0.916996	0.811888	0.515123	0.32142
1	0.830497	0.731481	0.811888	0.427775	0.547163	0.916996	0.811888	0.522858	0.32142
1	0.761429	0.746129	0.77744	0	0.643392	0.942502	0.343924	0.421891	0.265266
1	0.77744	0.761429	0.77744	0	0.643392	0.916996	0.339304	0.416107	0.268987
1	0.811888	0.746129	0.830497	0.439853	0.53077	0.916996	0.611599	0.45237	0.317091
1	0.811888	0.746129	0.811888	0.458804	0.53077	0.916996	0.621874	0.446055	0.30442
1	0.794233	0.761429	0.77744	0.421891	0.472043	0.916996	0.632465	0.621874	0.334745
1	0.811888	0.746129	0.830497	0.439853	0.53077	0.916996	0.611599	0.458804	0.312815
1	0.77744	0.761429	0.77744	0	0.643392	0.916996	0.343924	0.421891	0.265266
1	0.77744	0.666346	0.478859	0	0.472043	0.916996	0.794233	0.53077	0.28822
1	0.811888	0.746129	0.811888	0.458804	0.53077	0.916996	0.621874	0.446055	0.300298
1	0.830497	0.731481	0.811888	0.427775	0.547163	0.916996	0.811888	0.522858	0.32142
1	0.77744	0.77744	0.77744	0	0.643392	0.942502	0.339304	0.416107	0.265266
1	0.746129	0.746129	0.794233	0	0.643392	0.916996	0.334745	0.421891	0.257942
1	0.794233	0.761429	0.77744	0.433761	0.478859	0.942502	0.643392	0.621874	0.339304
1	0.811888	0.761429	0.761429	0.433761	0.485813	0.942502	0.632465	0.621874	0.32142
1	0.77744	0.77744	0.77744	0	0.643392	0.942502	0.343924	0.421891	0.280397
1	0.794233	0.77744	0.77744	0.427775	0.485813	0.916996	0.632465	0.621874	0.334745
1	0.830497	0.731481	0.811888	0.427775	0.547163	0.916996	0.811888	0.515123	0.32142
1	0.811888	0.746129	0.830497	0.439853	0.53077	0.916996	0.611599	0.45237	0.317091
1	0.830497	0.731481	0.811888	0.427775	0.547163	0.916996	0.811888	0.515123	0.325805
1	0.746129	0.746129	0.77744	0	0.643392	0.916996	0.339304	0.427775	0.254338
1	0.830497	0.746129	0.811888	0.410418	0.555662	0.916996	0.621874	0.46536	0.330246
1	0.811888	0.746129	0.830497	0.45237	0.53077	0.916996	0.621874	0.446055	0.308592
1	0.811888	0.746129	0.830497	0.439853	0.538869	0.916996	0.611599	0.458804	0.317091
1	0.794233	0.761429	0.77744	0.433761	0.478859	0.942502	0.643392	0.632465	0.334745
1	0.830497	0.746129	0.811888	0.410418	0.555662	0.916996	0.621874	0.46536	0.325805
1	0.746129	0.731481	0.77744	0	0.654678	0.916996	0.334745	0.416107	0.254338
1	0.794233	0.761429	0.77744	0.433761	0.478859	0.942502	0.643392	0.621874	0.343924
1	0.830497	0.731481	0.811888	0.427775	0.547163	0.916996	0.811888	0.515123	0.32142
1	0.761429	0.746129	0.794233	0	0.643392	0.916996	0.334745	0.416107	0.250771
1	0.77744	0.666346	0.472043	0	0.472043	0.916996	0.794233	0.522858	0.28822
1	0.811888	0.746129	0.830497	0.458804	0.53077	0.916996	0.621874	0.439853	0.300298
1	0.77744	0.666346	0.478859	0	0.46536	0.916996	0.794233	0.53077	0.28822
1	0.77744	0.666346	0.472043	0	0.472043	0.916996	0.794233	0.53077	0.28822
1	0.811888	0.761429	0.761429	0.433761	0.485813	0.942502	0.632465	0.621874	0.32142
1	0.794233	0.77744	0.77744	0.427775	0.472043	0.942502	0.632465	0.632465	0.339304
1	0.746129	0.731481	0.77744	0	0.654678	0.916996	0.343924	0.421891	0.257942
1	0.811888	0.746129	0.830497	0.439853	0.538869	0.916996	0.611599	0.458804	0.317091
1	0.794233	0.761429	0.77744	0.433761	0.478859	0.916996	0.643392	0.621874	0.339304
1	0.77744	0.761429	0.77744	0	0.643392	0.942502	0.339304	0.421891	0.265266
1	0.830497	0.731481	0.811888	0.427775	0.547163	0.916996	0.811888	0.522858	0.325805
1	0.794233	0.761429	0.761429	0.433761	0.485813	0.942502	0.632465	0.632465	0.325805
1	0.830497	0.731481	0.811888	0.427775	0.547163	0.916996	0.811888	0.515123	0.317091
1	0.811888	0.746129	0.811888	0.458804	0.53077	0.916996	0.621874	0.446055	0.30442
1	0.77744	0.666346	0.478859	0	0.458804	0.916996	0.794233	0.522858	0.280397
1	0.811888	0.761429	0.811888	0.427775	0.538869	0.916996	0.611599	0.446055	0.343924
1	0.830497	0.731481	0.811888	0.427775	0.547163	0.916996	0.811888	0.515123	0.325805
1	0.811888	0.746129	0.830497	0.45237	0.53077	0.916996	0.621874	0.446055	0.308592
1	0.77744	0.666346	0.472043	0	0.472043	0.916996	0.794233	0.53077	0.28822
1	0.77744	0.666346	0.478859	0	0.46536	0.916996	0.794233	0.53077	0.28822
1	0.811888	0.746129	0.830497	0.439853	0.53077	0.916996	0.611599	0.45237	0.317091
1	0.811888	0.746129	0.830497	0.439853	0.538869	0.916996	0.611599	0.458804	0.317091
1	0.811888	0.746129	0.811888	0.458804	0.53077	0.916996	0.621874	0.446055	0.300298
1	0.746129	0.746129	0.77744	0	0.654678	0.916996	0.339304	0.416107	0.254338
1	0.830497	0.746129	0.811888	0.410418	0.555662	0.916996	0.621874	0.472043	0.32142
1	0.811888	0.761429	0.811888	0.427775	0.538869	0.916996	0.611599	0.446055	0.348607
1	0.77744	0.666346	0.472043	0	0.46536	0.916996	0.794233	0.522858	0.284286
1	0.830497	0.761429	0.811888	0.421891	0.538869	0.916996	0.611599	0.439853	0.348607
1	0.830497	0.746129	0.811888	0.410418	0.555662	0.916996	0.621874	0.472043	0.317091
1	0.811888	0.746129	0.830497	0.458804	0.53077	0.916996	0.621874	0.446055	0.30442
1	0.761429	0.746129	0.77744	0	0.654678	0.942502	0.343924	0.416107	0.272748
1	0.794233	0.761429	0.761429	0.433761	0.485813	0.942502	0.632465	0.632465	0.325805
1	0.811888	0.746129	0.830497	0.45237	0.53077	0.916996	0.621874	0.446055	0.308592
1	0.811888	0.746129	0.811888	0.458804	0.53077	0.916996	0.621874	0.446055	0.300298
1	0.794233	0.761429	0.761429	0.433761	0.485813	0.942502	0.632465	0.621874	0.32142
1	0.811888	0.746129	0.830497	0.458804	0.53077	0.916996	0.621874	0.446055	0.30442
1	0.830497	0.746129	0.811888	0.410418	0.555662	0.916996	0.621874	0.46536	0.325805
1	0.830497	0.731481	0.811888	0.427775	0.547163	0.916996	0.811888	0.515123	0.325805
1	0.830497	0.731481	0.811888	0.427775	0.555662	0.916996	0.811888	0.515123	0.32142
1	0.794233	0.77744	0.77744	0	0.643392	0.942502	0.339304	0.421891	0.265266
1	0.811888	0.746129	0.830497	0.458804	0.53077	0.916996	0.621874	0.446055	0.30442
1	0.830497	0.746129	0.811888	0.404821	0.555662	0.916996	0.621874	0.472043	0.32142
1	0.830497	0.746129	0.794233	0.410418	0.555662	0.916996	0.621874	0.472043	0.317091
1	0.746129	0.746129	0.77744	0	0.654678	0.916996	0.343924	0.421891	0.243747
1	0.830497	0.746129	0.811888	0.410418	0.555662	0.916996	0.621874	0.472043	0.325805
1	0.77744	0.666346	0.472043	0	0.472043	0.916996	0.794233	0.53077	0.28822
1	0.830497	0.731481	0.811888	0.427775	0.547163	0.916996	0.811888	0.522858	0.32142
1	0.811888	0.746129	0.811888	0.458804	0.53077	0.916996	0.621874	0.446055	0.300298
1	0.830497	0.731481	0.811888	0.427775	0.547163	0.916996	0.811888	0.515123	0.325805
1	0.77744	0.666346	0.472043	0	0.472043	0.916996	0.794233	0.53077	0.28822
1	0.811888	0.761429	0.811888	0.427775	0.538869	0.916996	0.611599	0.446055	0.348607
1	0.794233	0.761429	0.77744	0.433761	0.485813	0.916996	0.632465	0.621874	0.334745
1	0.746129	0.746129	0.77744	0	0.654678	0.916996	0.343924	0.416107	0.250771
1	0.830497	0.731481	0.811888	0.433761	0.547163	0.916996	0.811888	0.515123	0.32142
1	0.746129	0.746129	0.77744	0	0.654678	0.916996	0.339304	0.421891	0.250771
1	0.811888	0.746129	0.830497	0.439853	0.53077	0.916996	0.611599	0.45237	0.317091
1	0.830497	0.731481	0.811888	0.427775	0.547163	0.916996	0.811888	0.515123	0.32142
1	0.811888	0.746129	0.830497	0.439853	0.53077	0.916996	0.621874	0.45237	0.317091
1	0.830497	0.761429	0.811888	0.421891	0.53077	0.916996	0.601621	0.439853	0.348607
1	0.811888	0.746129	0.830497	0.439853	0.53077	0.916996	0.611599	0.45237	0.317091
1	0.830497	0.731481	0.811888	0.427775	0.547163	0.916996	0.811888	0.507558	0.32142
1	0.811888	0.761429	0.811888	0.427775	0.538869	0.916996	0.611599	0.446055	0.348607
1	0.77744	0.666346	0.478859	0	0.46536	0.916996	0.794233	0.53077	0.284286
1	0.746129	0.731481	0.77744	0	0.654678	0.916996	0.343924	0.421891	0.257942
1	0.794233	0.761429	0.761429	0.433761	0.485813	0.942502	0.632465	0.632465	0.325805
1	0.794233	0.761429	0.761429	0.433761	0.485813	0.942502	0.632465	0.621874	0.325805
1	0.811888	0.746129	0.830497	0.458804	0.53077	0.916996	0.621874	0.446055	0.30442
1	0.830497	0.746129	0.811888	0.410418	0.555662	0.916996	0.621874	0.46536	0.325805
1	0.830497	0.746129	0.811888	0.410418	0.555662	0.916996	0.621874	0.46536	0.325805
1	0.830497	0.746129	0.811888	0.410418	0.555662	0.916996	0.621874	0.46536	0.325805
1	0.830497	0.761429	0.811888	0.421891	0.538869	0.916996	0.611599	0.439853	0.348607
1	0.77744	0.666346	0.472043	0	0.472043	0.916996	0.794233	0.53077	0.28822
1	0.830497	0.761429	0.811888	0.421891	0.53077	0.916996	0.601621	0.439853	0.348607
1	0.77744	0.666346	0.478859	0	0.472043	0.916996	0.794233	0.53077	0.28822
1	0.830497	0.746129	0.811888	0.410418	0.555662	0.916996	0.621874	0.46536	0.325805
1	0.77744	0.666346	0.472043	0	0.46536	0.916996	0.794233	0.522858	0.28822
1	0.830497	0.77744	0.811888	0.416107	0.53077	0.916996	0.601621	0.439853	0.348607
1	0.77744	0.666346	0.472043	0	0.46536	0.916996	0.794233	0.522858	0.284286
1	0.761429	0.761429	0.77744	0	0.643392	0.916996	0.334745	0.410418	0.268987
1	0.77744	0.666346	0.472043	0	0.46536	0.916996	0.794233	0.522858	0.28822
1	0.746129	0.746129	0.794233	0	0.643392	0.916996	0.339304	0.416107	0.247241
1	0.77744	0.666346	0.478859	0	0.46536	0.916996	0.794233	0.522858	0.280397
1	0.794233	0.77744	0.77744	0.427775	0.46536	0.916996	0.632465	0.621874	0.339304
1	0.830497	0.731481	0.811888	0.427775	0.547163	0.916996	0.811888	0.515123	0.32142
1	0.830497	0.746129	0.811888	0.410418	0.555662	0.916996	0.621874	0.472043	0.317091
1	0.77744	0.666346	0.478859	0	0.46536	0.916996	0.794233	0.522858	0.284286
1	0.830497	0.746129	0.811888	0.410418	0.555662	0.916996	0.621874	0.472043	0.32142
1	0.830497	0.746129	0.811888	0.404821	0.555662	0.916996	0.621874	0.472043	0.317091
1	0.830497	0.731481	0.811888	0.427775	0.547163	0.916996	0.811888	0.515123	0.325805
1	0.811888	0.746129	0.811888	0.458804	0.53077	0.916996	0.621874	0.446055	0.300298
1	0.830497	0.761429	0.811888	0.421891	0.53077	0.916996	0.601621	0.439853	0.353354
1	0.830497	0.746129	0.811888	0.410418	0.555662	0.916996	0.621874	0.472043	0.32142
1	0.830497	0.77744	0.811888	0.421891	0.53077	0.916996	0.601621	0.439853	0.348607
1	0.830497	0.746129	0.811888	0.410418	0.555662	0.916996	0.621874	0.472043	0.32142
1	0.830497	0.746129	0.794233	0.404821	0.555662	0.916996	0.621874	0.478859	0.317091
1	0.830497	0.746129	0.811888	0.410418	0.555662	0.916996	0.621874	0.472043	0.32142
1	0.746129	0.746129	0.77744	0	0.654678	0.916996	0.343924	0.421891	0.250771
1	0.77744	0.666346	0.472043	0	0.46536	0.916996	0.794233	0.522858	0.284286
1	0.811888	0.746129	0.830497	0.45237	0.53077	0.916996	0.621874	0.446055	0.308592
1	0.830497	0.746129	0.811888	0.410418	0.555662	0.916996	0.621874	0.46536	0.325805
1	0.77744	0.666346	0.472043	0	0.46536	0.916996	0.794233	0.522858	0.284286
1	0.830497	0.746129	0.811888	0.410418	0.555662	0.916996	0.621874	0.46536	0.325805
1	0.794233	0.761429	0.761429	0.439853	0.478859	0.942502	0.632465	0.632465	0.330246
1	0.746129	0.731481	0.77744	0	0.666346	0.916996	0.343924	0.421891	0.257942
1	0.830497	0.731481	0.811888	0.427775	0.547163	0.916996	0.811888	0.515123	0.32142
1	0.77744	0.77744	0.77744	0	0.643392	0.942502	0.334745	0.421891	0.268987
1	0.830497	0.731481	0.811888	0.427775	0.547163	0.916996	0.811888	0.515123	0.317091
1	0.830497	0.746129	0.811888	0.410418	0.555662	0.916996	0.621874	0.472043	0.32142
1	0.811888	0.761429	0.811888	0.421891	0.538869	0.916996	0.611599	0.439853	0.348607
1	0.830497	0.761429	0.811888	0.421891	0.538869	0.916996	0.611599	0.439853	0.348607
1	0.811888	0.761429	0.811888	0.427775	0.538869	0.916996	0.611599	0.446055	0.334745
1	0.830497	0.761429	0.811888	0.421891	0.538869	0.916996	0.611599	0.439853	0.348607
1	0.77744	0.761429	0.77744	0	0.643392	0.942502	0.334745	0.421891	0.265266
1	0.830497	0.746129	0.811888	0.410418	0.555662	0.916996	0.621874	0.46536	0.325805
1	0.77744	0.666346	0.472043	0	0.472043	0.916996	0.794233	0.53077	0.28822
1	0.794233	0.761429	0.77744	0.427775	0.478859	0.942502	0.632465	0.621874	0.334745
1	0.746129	0.746129	0.77744	0	0.643392	0.916996	0.334745	0.421891	0.254338
1	0.77744	0.666346	0.472043	0	0.472043	0.916996	0.794233	0.53077	0.28822
1	0.811888	0.761429	0.811888	0.427775	0.538869	0.916996	0.611599	0.446055	0.343924
1	0.830497	0.746129	0.811888	0.410418	0.555662	0.916996	0.621874	0.472043	0.32142
1	0.811888	0.746129	0.830497	0.439853	0.53077	0.916996	0.611599	0.45237	0.317091
1	0.830497	0.746129	0.811888	0.410418	0.555662	0.916996	0.621874	0.46536	0.325805
1	0.77744	0.666346	0.472043	0	0.46536	0.916996	0.794233	0.522858	0.284286
1	0.77744	0.666346	0.478859	0	0.46536	0.916996	0.794233	0.53077	0.284286
1	0.77744	0.666346	0.478859	0	0.472043	0.916996	0.794233	0.53077	0.28822
1	0.77744	0.77744	0.77744	0	0.643392	0.942502	0.339304	0.421891	0.254338
1	0.830497	0.761429	0.811888	0.427775	0.53077	0.916996	0.601621	0.439853	0.348607
1	0.830497	0.731481	0.811888	0.427775	0.547163	0.916996	0.811888	0.515123	0.325805
1	0.77744	0.666346	0.478859	0	0.458804	0.916996	0.794233	0.522858	0.280397
1	0.77744	0.666346	0.478859	0	0.46536	0.916996	0.794233	0.522858	0.280397
1	0.830497	0.731481	0.811888	0.427775	0.547163	0.916996	0.811888	0.515123	0.32142
1	0.746129	0.746129	0.77744	0	0.654678	0.916996	0.343924	0.421891	0.243747
1	0.794233	0.761429	0.761429	0.439853	0.478859	0.916996	0.632465	0.632465	0.330246
1	0.794233	0.761429	0.77744	0.433761	0.485813	0.942502	0.643392	0.621874	0.339304
1	0.77744	0.666346	0.478859	0	0.46536	0.916996	0.794233	0.522858	0.284286
1	0.830497	0.731481	0.811888	0.427775	0.547163	0.916996	0.811888	0.515123	0.32142
1	0.794233	0.77744	0.77744	0.427775	0.472043	0.916996	0.621874	0.632465	0.334745
1	0.811888	0.746129	0.830497	0.439853	0.538869	0.916996	0.611599	0.458804	0.312815
1	0.830497	0.746129	0.811888	0.410418	0.555662	0.916996	0.621874	0.472043	0.325805
1	0.830497	0.761429	0.811888	0.410418	0.53077	0.916996	0.601621	0.433761	0.343924
1	0.830497	0.731481	0.811888	0.427775	0.547163	0.916996	0.811888	0.515123	0.32142
1	0.830497	0.731481	0.811888	0.427775	0.547163	0.916996	0.811888	0.522858	0.325805
1	0.761429	0.761429	0.77744	0	0.643392	0.942502	0.330246	0.410418	0.268987
1	0.830497	0.746129	0.811888	0.410418	0.555662	0.916996	0.621874	0.46536	0.330246
1	0.830497	0.731481	0.811888	0.433761	0.547163	0.916996	0.811888	0.515123	0.32142
1	0.830497	0.746129	0.811888	0.410418	0.555662	0.916996	0.621874	0.46536	0.325805
1	0.811888	0.746129	0.830497	0.458804	0.53077	0.916996	0.621874	0.446055	0.30442
1	0.830497	0.761429	0.811888	0.421891	0.53077	0.916996	0.601621	0.439853	0.353354
1	0.77744	0.666346	0.478859	0	0.46536	0.916996	0.794233	0.522858	0.280397
1	0.811888	0.746129	0.830497	0.439853	0.538869	0.916996	0.611599	0.458804	0.312815
1	0.830497	0.731481	0.811888	0.427775	0.547163	0.916996	0.811888	0.515123	0.317091
1	0.794233	0.761429	0.761429	0.433761	0.478859	0.942502	0.632465	0.632465	0.325805
1	0.77744	0.666346	0.472043	0	0.46536	0.916996	0.794233	0.522858	0.284286
1	0.830497	0.746129	0.811888	0.410418	0.555662	0.916996	0.621874	0.472043	0.317091
1	0.830497	0.761429	0.811888	0.421891	0.53077	0.916996	0.601621	0.439853	0.353354
1	0.830497	0.761429	0.811888	0.421891	0.53077	0.916996	0.601621	0.446055	0.348607
1	0.794233	0.761429	0.761429	0.433761	0.478859	0.942502	0.632465	0.632465	0.325805
1	0.830497	0.731481	0.811888	0.427775	0.547163	0.916996	0.811888	0.515123	0.325805
1	0.77744	0.77744	0.77744	0	0.643392	0.942502	0.348607	0.427775	0.280397
1	0.811888	0.761429	0.811888	0.427775	0.538869	0.916996	0.611599	0.446055	0.343924
1	0.794233	0.761429	0.761429	0.433761	0.485813	0.942502	0.632465	0.632465	0.325805
1	0.77744	0.666346	0.472043	0	0.472043	0.916996	0.794233	0.53077	0.28822
1	0.77744	0.761429	0.77744	0	0.643392	0.942502	0.334745	0.416107	0.268987
1	0.811888	0.761429	0.811888	0.421891	0.538869	0.916996	0.611599	0.433761	0.353354
1	0.830497	0.731481	0.811888	0.427775	0.547163	0.916996	0.811888	0.515123	0.32142
1	0.811888	0.746129	0.830497	0.458804	0.53077	0.916996	0.621874	0.446055	0.30442
1	0.811888	0.746129	0.830497	0.458804	0.53077	0.916996	0.621874	0.446055	0.300298
1	0.794233	0.77744	0.77744	0.427775	0.46536	0.916996	0.632465	0.621874	0.339304
1	0.830497	0.731481	0.811888	0.427775	0.547163	0.916996	0.811888	0.515123	0.317091
1	0.830497	0.77744	0.811888	0.421891	0.53077	0.916996	0.601621	0.439853	0.353354
1	0.77744	0.666346	0.478859	0	0.458804	0.916996	0.794233	0.522858	0.280397
1	0.77744	0.666346	0.478859	0	0.46536	0.916996	0.794233	0.53077	0.284286
1	0.77744	0.666346	0.478859	0	0.472043	0.916996	0.794233	0.53077	0.28822
1	0.746129	0.746129	0.77744	0	0.654678	0.916996	0.343924	0.421891	0.250771
1	0.830497	0.731481	0.811888	0.427775	0.547163	0.916996	0.811888	0.515123	0.32142
1	0.77744	0.666346	0.478859	0	0.458804	0.916996	0.794233	0.522858	0.280397
1	0.77744	0.666346	0.478859	0	0.472043	0.916996	0.794233	0.53077	0.284286
1	0.830497	0.761429	0.811888	0.421891	0.53077	0.916996	0.601621	0.439853	0.353354
1	0.77744	0.666346	0.472043	0	0.472043	0.916996	0.794233	0.53077	0.28822
1	0.746129	0.746129	0.77744	0	0.666346	0.916996	0.339304	0.421891	0.261584
1	0.830497	0.746129	0.811888	0.410418	0.555662	0.916996	0.621874	0.472043	0.32142
1	0.830497	0.761429	0.811888	0.410418	0.53077	0.916996	0.601621	0.433761	0.343924
1	0.811888	0.761429	0.811888	0.421891	0.538869	0.916996	0.611599	0.439853	0.353354
1	0.830497	0.731481	0.811888	0.427775	0.547163	0.916996	0.811888	0.515123	0.325805
1	0.811888	0.746129	0.830497	0.439853	0.53077	0.916996	0.611599	0.45237	0.317091
1	0.77744	0.666346	0.472043	0	0.46536	0.916996	0.794233	0.522858	0.284286
1	0.830497	0.746129	0.811888	0.410418	0.555662	0.916996	0.621874	0.472043	0.32142
1	0.830497	0.746129	0.811888	0.410418	0.555662	0.916996	0.621874	0.46536	0.330246
1	0.830497	0.761429	0.811888	0.421891	0.53077	0.916996	0.601621	0.439853	0.348607
1	0.830497	0.731481	0.811888	0.427775	0.547163	0.916996	0.811888	0.515123	0.317091
1	0.811888	0.761429	0.761429	0.433761	0.485813	0.942502	0.632465	0.621874	0.32142
1	0.811888	0.761429	0.811888	0.427775	0.538869	0.916996	0.611599	0.446055	0.343924
1	0.761429	0.746129	0.794233	0	0.654678	0.916996	0.339304	0.416107	0.247241
1	0.77744	0.666346	0.472043	0	0.472043	0.916996	0.794233	0.522858	0.28822
1	0.830497	0.746129	0.811888	0.410418	0.555662	0.916996	0.621874	0.472043	0.32142
1	0.77744	0.666346	0.478859	0	0.46536	0.916996	0.794233	0.53077	0.284286
1	0.746129	0.746129	0.794233	0	0.654678	0.916996	0.330246	0.421891	0.250771
1	0.811888	0.746129	0.830497	0.446055	0.53077	0.916996	0.611599	0.45237	0.312815
1	0.811888	0.746129	0.830497	0.439853	0.538869	0.916996	0.611599	0.458804	0.312815
1	0.746129	0.746129	0.794233	0	0.654678	0.916996	0.334745	0.416107	0.250771
1	0.794233	0.761429	0.77744	0.427775	0.478859	0.942502	0.632465	0.621874	0.330246
1	0.830497	0.746129	0.811888	0.410418	0.555662	0.916996	0.621874	0.472043	0.32142
1	0.811888	0.761429	0.811888	0.427775	0.538869	0.916996	0.611599	0.446055	0.343924
1	0.746129	0.731481	0.77744	0	0.666346	0.916996	0.343924	0.416107	0.257942
1	0.794233	0.761429	0.761429	0.439853	0.472043	0.916996	0.632465	0.632465	0.330246
1	0.77744	0.77744	0.77744	0	0.643392	0.942502	0.343924	0.410418	0.268987
1	0.830497	0.746129	0.811888	0.410418	0.555662	0.916996	0.621874	0.46536	0.325805
1	0.794233	0.761429	0.761429	0.433761	0.485813	0.942502	0.632465	0.621874	0.32142
1	0.811888	0.761429	0.761429	0.427775	0.485813	0.942502	0.632465	0.621874	0.32142
1	0.77744	0.77744	0.77744	0	0.643392	0.942502	0.334745	0.416107	0.261584
1	0.830497	0.761429	0.811888	0.433761	0.53077	0.916996	0.601621	0.446055	0.353354
1	0.830497	0.761429	0.811888	0.410418	0.53077	0.916996	0.601621	0.433761	0.343924
1	0.830497	0.731481	0.811888	0.427775	0.547163	0.916996	0.811888	0.515123	0.317091
1	0.761429	0.746129	0.77744	0	0.643392	0.942502	0.343924	0.427775	0.265266
1	0.830497	0.761429	0.811888	0.416107	0.53077	0.916996	0.601621	0.439853	0.348607
1	0.830497	0.746129	0.811888	0.410418	0.555662	0.916996	0.621874	0.472043	0.317091
1	0.811888	0.761429	0.761429	0.427775	0.485813	0.942502	0.632465	0.621874	0.325805
1	0.830497	0.746129	0.811888	0.410418	0.555662	0.916996	0.621874	0.46536	0.330246
1	0.830497	0.731481	0.811888	0.427775	0.547163	0.916996	0.811888	0.515123	0.317091
1	0.77744	0.666346	0.478859	0	0.472043	0.916996	0.794233	0.53077	0.284286
1	0.746129	0.746129	0.794233	0	0.643392	0.916996	0.339304	0.421891	0.247241
1	0.830497	0.731481	0.811888	0.427775	0.547163	0.916996	0.811888	0.515123	0.325805
1	0.830497	0.731481	0.811888	0.433761	0.547163	0.916996	0.811888	0.515123	0.32142
1	0.761429	0.761429	0.77744	0	0.643392	0.916996	0.339304	0.421891	0.272748
1	0.830497	0.731481	0.811888	0.427775	0.547163	0.916996	0.811888	0.515123	0.32142
1	0.761429	0.746129	0.77744	0	0.654678	0.942502	0.348607	0.421891	0.268987
1	0.811888	0.746129	0.830497	0.45237	0.53077	0.916996	0.621874	0.446055	0.308592
1	0.746129	0.746129	0.77744	0	0.666346	0.916996	0.334745	0.416107	0.250771
1	0.830497	0.731481	0.811888	0.427775	0.547163	0.916996	0.811888	0.515123	0.325805
1	0.77744	0.77744	0.77744	0	0.643392	0.942502	0.334745	0.416107	0.265266
1	0.746129	0.746129	0.77744	0	0.654678	0.916996	0.343924	0.421891	0.247241
1	0.830497	0.761429	0.811888	0.416107	0.53077	0.916996	0.601621	0.433761	0.343924
1	0.830497	0.746129	0.794233	0.404821	0.555662	0.916996	0.621874	0.472043	0.317091
1	0.830497	0.731481	0.811888	0.427775	0.547163	0.916996	0.811888	0.515123	0.325805
1	0.830497	0.761429	0.811888	0.421891	0.53077	0.916996	0.601621	0.433761	0.343924
1	0.830497	0.746129	0.811888	0.410418	0.555662	0.916996	0.621874	0.472043	0.330246
1	0.77744	0.666346	0.472043	0	0.46536	0.916996	0.794233	0.522858	0.284286
1	0.830497	0.746129	0.811888	0.410418	0.555662	0.916996	0.621874	0.472043	0.325805
1	0.811888	0.746129	0.830497	0.439853	0.538869	0.916996	0.611599	0.458804	0.312815
1	0.811888	0.761429	0.811888	0.427775	0.538869	0.916996	0.611599	0.439853	0.334745
1	0.794233	0.77744	0.77744	0.427775	0.472043	0.916996	0.621874	0.632465	0.334745
1	0.830497	0.731481	0.811888	0.427775	0.547163	0.916996	0.811888	0.515123	0.32142
1	0.830497	0.731481	0.811888	0.427775	0.547163	0.916996	0.811888	0.515123	0.32142
1	0.811888	0.761429	0.761429	0.433761	0.485813	0.942502	0.632465	0.632465	0.32142
1	0.830497	0.731481	0.811888	0.427775	0.547163	0.916996	0.811888	0.515123	0.32142
1	0.830497	0.761429	0.811888	0.421891	0.53077	0.916996	0.601621	0.439853	0.343924
1	0.77744	0.666346	0.478859	0	0.46536	0.916996	0.794233	0.53077	0.284286
1	0.77744	0.761429	0.77744	0	0.643392	0.942502	0.334745	0.421891	0.265266
1	0.830497	0.731481	0.811888	0.433761	0.547163	0.916996	0.811888	0.515123	0.32142
1	0.761429	0.746129	0.794233	0	0.643392	0.916996	0.339304	0.421891	0.247241
1	0.830497	0.746129	0.811888	0.410418	0.555662	0.916996	0.621874	0.46536	0.330246
1	0.811888	0.746129	0.830497	0.458804	0.53077	0.916996	0.621874	0.446055	0.30442
1	0.77744	0.666346	0.478859	0	0.46536	0.916996	0.794233	0.53077	0.284286
1	0.811888	0.761429	0.811888	0.421891	0.538869	0.916996	0.611599	0.446055	0.339304
1	0.746129	0.746129	0.77744	0	0.654678	0.942502	0.339304	0.416107	0.254338
1	0.830497	0.731481	0.811888	0.427775	0.547163	0.916996	0.811888	0.515123	0.32142
1	0.746129	0.746129	0.77744	0	0.654678	0.916996	0.334745	0.427775	0.257942
1	0.830497	0.731481	0.811888	0.427775	0.547163	0.916996	0.811888	0.515123	0.32142
1	0.77744	0.666346	0.478859	0	0.46536	0.916996	0.794233	0.53077	0.28822
1	0.746129	0.746129	0.77744	0	0.654678	0.916996	0.339304	0.416107	0.254338
1	0.830497	0.746129	0.811888	0.410418	0.555662	0.916996	0.621874	0.472043	0.317091
1	0.77744	0.666346	0.472043	0	0.472043	0.916996	0.794233	0.53077	0.28822
1	0.794233	0.77744	0.77744	0.421891	0.472043	0.916996	0.621874	0.632465	0.339304
1	0.77744	0.77744	0.77744	0	0.643392	0.942502	0.334745	0.416107	0.257942
1	0.746129	0.746129	0.794233	0	0.643392	0.916996	0.330246	0.421891	0.257942
1	0.830497	0.746129	0.811888	0.410418	0.555662	0.916996	0.621874	0.472043	0.32142
1	0.77744	0.666346	0.472043	0	0.46536	0.916996	0.794233	0.522858	0.284286
1	0.794233	0.77744	0.77744	0.427775	0.46536	0.916996	0.632465	0.621874	0.339304
1	0.811888	0.761429	0.811888	0.427775	0.538869	0.916996	0.611599	0.446055	0.343924
1	0.77744	0.666346	0.478859	0	0.458804	0.916996	0.794233	0.522858	0.280397
1	0.77744	0.666346	0.478859	0	0.472043	0.916996	0.794233	0.53077	0.292199
1	0.794233	0.761429	0.761429	0.439853	0.478859	0.942502	0.632465	0.632465	0.325805
1	0.811888	0.746129	0.830497	0.439853	0.538869	0.916996	0.611599	0.458804	0.317091
1	0.830497	0.731481	0.811888	0.427775	0.547163	0.916996	0.811888	0.515123	0.32142
1	0.811888	0.761429	0.761429	0.433761	0.485813	0.942502	0.632465	0.621874	0.32142
1	0.830497	0.731481	0.811888	0.427775	0.547163	0.916996	0.811888	0.507558	0.32142
1	0.811888	0.761429	0.811888	0.427775	0.538869	0.916996	0.611599	0.439853	0.343924
1	0.746129	0.731481	0.77744	0	0.654678	0.916996	0.339304	0.410418	0.257942
1	0.830497	0.746129	0.811888	0.410418	0.555662	0.916996	0.621874	0.472043	0.32142
1	0.811888	0.746129	0.830497	0.458804	0.53077	0.916996	0.621874	0.439853	0.300298
1	0.794233	0.77744	0.77744	0.421891	0.472043	0.942502	0.632465	0.632465	0.343924
1	0.761429	0.746129	0.77744	0	0.654678	0.942502	0.343924	0.421891	0.265266
1	0.830497	0.731481	0.811888	0.427775	0.547163	0.916996	0.811888	0.515123	0.32142
1	0.830497	0.77744	0.811888	0.427775	0.53077	0.916996	0.601621	0.439853	0.353354
1	0.761429	0.746129	0.77744	0	0.643392	0.916996	0.339304	0.421891	0.261584
1	0.761429	0.746129	0.794233	0	0.643392	0.916996	0.339304	0.421891	0.247241
1	0.77744	0.666346	0.478859	0	0.46536	0.916996	0.794233	0.522858	0.280397
1	0.77744	0.666346	0.472043	0	0.46536	0.916996	0.794233	0.53077	0.284286
1	0.811888	0.746129	0.830497	0.439853	0.53077	0.916996	0.611599	0.45237	0.317091
1	0.77744	0.666346	0.478859	0	0.458804	0.916996	0.794233	0.522858	0.280397
1	0.794233	0.77744	0.77744	0.427775	0.485813	0.916996	0.632465	0.621874	0.334745
1	0.830497	0.746129	0.811888	0.410418	0.555662	0.916996	0.621874	0.472043	0.317091
1	0.830497	0.746129	0.811888	0.410418	0.555662	0.916996	0.621874	0.46536	0.330246
1	0.77744	0.666346	0.478859	0	0.472043	0.916996	0.794233	0.53077	0.284286
1	0.811888	0.746129	0.830497	0.458804	0.53077	0.916996	0.621874	0.446055	0.30442
1	0.811888	0.746129	0.830497	0.439853	0.538869	0.916996	0.611599	0.458804	0.312815
1	0.811888	0.746129	0.830497	0.458804	0.53077	0.916996	0.621874	0.439853	0.300298
1	0.794233	0.761429	0.77744	0.433761	0.485813	0.916996	0.632465	0.621874	0.334745
1	0.77744	0.666346	0.478859	0	0.458804	0.916996	0.794233	0.53077	0.280397
1	0.794233	0.761429	0.761429	0.433761	0.485813	0.942502	0.632465	0.621874	0.325805
1	0.830497	0.746129	0.794233	0.404821	0.555662	0.916996	0.621874	0.472043	0.317091
1	0.830497	0.761429	0.811888	0.421891	0.53077	0.916996	0.601621	0.439853	0.348607
1	0.794233	0.761429	0.761429	0.433761	0.478859	0.942502	0.632465	0.632465	0.325805
1	0.77744	0.666346	0.478859	0	0.472043	0.916996	0.794233	0.53077	0.284286
1	0.830497	0.77744	0.811888	0.421891	0.53077	0.916996	0.601621	0.439853	0.353354
1	0.77744	0.666346	0.472043	0	0.46536	0.916996	0.794233	0.522858	0.284286
1	0.811888	0.761429	0.811888	0.427775	0.538869	0.916996	0.611599	0.446055	0.334745
1	0.794233	0.77744	0.77744	0.427775	0.46536	0.916996	0.632465	0.621874	0.334745
1	0.794233	0.77744	0.77744	0.427775	0.472043	0.942502	0.632465	0.632465	0.339304
1	0.830497	0.746129	0.811888	0.404821	0.555662	0.916996	0.621874	0.46536	0.325805
1	0.830497	0.77744	0.811888	0.421891	0.53077	0.916996	0.601621	0.446055	0.353354
1	0.811888	0.761429	0.811888	0.427775	0.538869	0.916996	0.611599	0.446055	0.334745
1	0.77744	0.666346	0.472043	0	0.46536	0.916996	0.794233	0.53077	0.280397
1	0.761429	0.761429	0.77744	0	0.643392	0.916996	0.339304	0.421891	0.272748
1	0.77744	0.761429	0.77744	0	0.643392	0.942502	0.343924	0.421891	0.265266
1	0.830497	0.746129	0.811888	0.410418	0.555662	0.916996	0.621874	0.46536	0.330246
1	0.811888	0.746129	0.830497	0.458804	0.53077	0.916996	0.621874	0.446055	0.308592
1	0.811888	0.761429	0.761429	0.427775	0.485813	0.942502	0.632465	0.621874	0.32142
1	0.830497	0.746129	0.794233	0.404821	0.555662	0.916996	0.621874	0.478859	0.317091
1	0.811888	0.746129	0.830497	0.439853	0.538869	0.916996	0.611599	0.458804	0.312815
1	0.761429	0.746129	0.77744	0	0.654678	0.942502	0.343924	0.416107	0.265266
1	0.77744	0.77744	0.77744	0	0.643392	0.942502	0.334745	0.421891	0.261584
1	0.830497	0.731481	0.811888	0.427775	0.547163	0.916996	0.811888	0.515123	0.32142
1	0.830497	0.731481	0.811888	0.427775	0.547163	0.916996	0.811888	0.522858	0.325805
1	0.811888	0.746129	0.811888	0.458804	0.53077	0.916996	0.621874	0.446055	0.300298
1	0.811888	0.746129	0.811888	0.458804	0.53077	0.916996	0.621874	0.446055	0.300298
1	0.830497	0.761429	0.811888	0.416107	0.53077	0.916996	0.601621	0.439853	0.353354
1	0.811888	0.761429	0.811888	0.427775	0.538869	0.916996	0.611599	0.446055	0.343924
1	0.746129	0.746129	0.77744	0	0.654678	0.916996	0.334745	0.421891	0.250771
1	0.830497	0.746129	0.811888	0.410418	0.555662	0.916996	0.621874	0.472043	0.32142
1	0.830497	0.731481	0.811888	0.427775	0.547163	0.916996	0.811888	0.515123	0.32142
1	0.77744	0.77744	0.77744	0	0.643392	0.942502	0.343924	0.421891	0.280397
1	0.811888	0.761429	0.761429	0.433761	0.485813	0.942502	0.632465	0.621874	0.32142
1	0.811888	0.746129	0.811888	0.458804	0.53077	0.916996	0.621874	0.446055	0.300298
1	0.811888	0.761429	0.761429	0.427775	0.485813	0.942502	0.632465	0.621874	0.32142
1	0.811888	0.746129	0.811888	0.458804	0.53077	0.916996	0.621874	0.446055	0.300298
1	0.77744	0.761429	0.77744	0	0.643392	0.942502	0.334745	0.421891	0.261584
1	0.77744	0.666346	0.472043	0	0.472043	0.916996	0.794233	0.522858	0.28822
1	0.830497	0.731481	0.811888	0.427775	0.547163	0.916996	0.811888	0.515123	0.317091
1	0.811888	0.746129	0.830497	0.458804	0.53077	0.916996	0.621874	0.439853	0.30442
1	0.811888	0.761429	0.811888	0.421891	0.538869	0.916996	0.611599	0.433761	0.353354
1	0.830497	0.731481	0.811888	0.427775	0.547163	0.916996	0.811888	0.515123	0.32142
1	0.830497	0.761429	0.811888	0.416107	0.53077	0.916996	0.601621	0.433761	0.343924
1	0.830497	0.731481	0.811888	0.427775	0.547163	0.916996	0.811888	0.515123	0.32142
1	0.794233	0.77744	0.77744	0.427775	0.472043	0.916996	0.632465	0.632465	0.339304
1	0.830497	0.731481	0.811888	0.433761	0.547163	0.916996	0.811888	0.522858	0.32142
1	0.830497	0.746129	0.811888	0.404821	0.555662	0.916996	0.621874	0.472043	0.32142
1	0.811888	0.746129	0.830497	0.439853	0.53077	0.916996	0.611599	0.45237	0.317091
1	0.77744	0.666346	0.472043	0	0.472043	0.916996	0.794233	0.522858	0.28822
1	0.830497	0.761429	0.811888	0.416107	0.53077	0.916996	0.601621	0.446055	0.348607
1	0.811888	0.746129	0.830497	0.446055	0.53077	0.916996	0.611599	0.446055	0.317091
1	0.746129	0.746129	0.77744	0	0.654678	0.916996	0.343924	0.416107	0.254338
1	0.794233	0.77744	0.77744	0.427775	0.478859	0.916996	0.632465	0.632465	0.334745
1	0.794233	0.761429	0.77744	0.427775	0.478859	0.942502	0.632465	0.621874	0.334745
1	0.794233	0.77744	0.77744	0.427775	0.46536	0.916996	0.632465	0.632465	0.334745
1	0.830497	0.731481	0.811888	0.427775	0.547163	0.916996	0.811888	0.515123	0.317091
1	0.830497	0.746129	0.794233	0.410418	0.555662	0.916996	0.621874	0.472043	0.317091
1	0.811888	0.746129	0.830497	0.439853	0.53077	0.916996	0.611599	0.45237	0.317091
1	0.77744	0.77744	0.77744	0	0.643392	0.942502	0.334745	0.416107	0.257942
1	0.811888	0.746129	0.811888	0.458804	0.53077	0.916996	0.621874	0.446055	0.30442
1	0.811888	0.761429	0.811888	0.427775	0.538869	0.916996	0.611599	0.439853	0.348607
1	0.830497	0.731481	0.811888	0.433761	0.547163	0.916996	0.811888	0.515123	0.317091
1	0.794233	0.77744	0.77744	0.427775	0.46536	0.916996	0.632465	0.632465	0.334745
1	0.830497	0.746129	0.811888	0.410418	0.555662	0.916996	0.621874	0.472043	0.32142
1	0.746129	0.746129	0.77744	0	0.654678	0.916996	0.334745	0.421891	0.254338
1	0.811888	0.746129	0.830497	0.439853	0.53077	0.916996	0.611599	0.458804	0.312815
1	0.811888	0.761429	0.811888	0.427775	0.538869	0.916996	0.611599	0.446055	0.334745
1	0.830497	0.77744	0.811888	0.421891	0.53077	0.916996	0.601621	0.439853	0.353354
1	0.77744	0.666346	0.478859	0	0.472043	0.916996	0.794233	0.53077	0.284286
1	0.794233	0.761429	0.761429	0.439853	0.478859	0.942502	0.632465	0.632465	0.325805
1	0.811888	0.746129	0.830497	0.439853	0.538869	0.916996	0.611599	0.45237	0.312815
1	0.794233	0.77744	0.77744	0	0.643392	0.942502	0.334745	0.416107	0.254338
1	0.794233	0.761429	0.761429	0.433761	0.485813	0.942502	0.632465	0.621874	0.325805
1	0.77744	0.666346	0.472043	0	0.472043	0.916996	0.794233	0.53077	0.28822
1	0.811888	0.746129	0.811888	0.458804	0.53077	0.916996	0.621874	0.446055	0.30442
1	0.77744	0.77744	0.77744	0	0.643392	0.942502	0.334745	0.421891	0.272748
1	0.830497	0.731481	0.811888	0.433761	0.547163	0.916996	0.811888	0.515123	0.32142
1	0.830497	0.746129	0.811888	0.410418	0.555662	0.916996	0.621874	0.472043	0.325805
1	0.811888	0.761429	0.761429	0.433761	0.485813	0.942502	0.632465	0.632465	0.325805
1	0.811888	0.746129	0.830497	0.439853	0.538869	0.916996	0.611599	0.458804	0.317091
1	0.794233	0.761429	0.761429	0.433761	0.485813	0.942502	0.632465	0.621874	0.325805
1	0.794233	0.77744	0.77744	0.427775	0.46536	0.916996	0.632465	0.621874	0.339304
1	0.830497	0.731481	0.811888	0.433761	0.547163	0.916996	0.811888	0.515123	0.32142
1	0.811888	0.746129	0.830497	0.45237	0.53077	0.916996	0.621874	0.45237	0.308592
1	0.794233	0.761429	0.761429	0.433761	0.485813	0.942502	0.632465	0.632465	0.325805
1	0.811888	0.761429	0.761429	0.433761	0.485813	0.942502	0.632465	0.632465	0.325805
1	0.811888	0.761429	0.811888	0.427775	0.538869	0.916996	0.611599	0.446055	0.334745
1	0.811888	0.746129	0.830497	0.45237	0.53077	0.916996	0.621874	0.45237	0.308592
1	0.761429	0.746129	0.794233	0	0.643392	0.916996	0.334745	0.416107	0.250771
1	0.794233	0.77744	0.77744	0.421891	0.472043	0.916996	0.621874	0.632465	0.339304
1	0.830497	0.731481	0.811888	0.433761	0.547163	0.916996	0.811888	0.515123	0.32142
1	0.811888	0.746129	0.830497	0.446055	0.53077	0.916996	0.611599	0.446055	0.317091
1	0.830497	0.761429	0.811888	0.416107	0.53077	0.916996	0.601621	0.439853	0.353354
1	0.761429	0.761429	0.77744	0	0.643392	0.916996	0.339304	0.416107	0.276551
1	0.77744	0.77744	0.77744	0	0.643392	0.942502	0.330246	0.416107	0.257942
1	0.830497	0.731481	0.811888	0.427775	0.547163	0.916996	0.811888	0.515123	0.317091
1	0.830497	0.77744	0.811888	0.421891	0.53077	0.916996	0.601621	0.439853	0.353354
1	0.746129	0.746129	0.794233	0	0.654678	0.942502	0.339304	0.421891	0.254338
1	0.77744	0.666346	0.472043	0	0.46536	0.916996	0.794233	0.522858	0.28822
1	0.830497	0.761429	0.811888	0.416107	0.538869	0.916996	0.611599	0.433761	0.348607
1	0.811888	0.746129	0.811888	0.458804	0.53077	0.916996	0.621874	0.446055	0.300298
1	0.811888	0.746129	0.811888	0.458804	0.53077	0.916996	0.621874	0.446055	0.300298
1	0.830497	0.746129	0.811888	0.410418	0.555662	0.916996	0.621874	0.46536	0.330246
1	0.830497	0.731481	0.811888	0.427775	0.547163	0.916996	0.811888	0.515123	0.32142
1	0.830497	0.77744	0.811888	0.421891	0.53077	0.916996	0.601621	0.439853	0.353354
1	0.746129	0.746129	0.77744	0	0.654678	0.916996	0.334745	0.421891	0.254338
1	0.811888	0.761429	0.761429	0.427775	0.485813	0.942502	0.632465	0.621874	0.325805
1	0.811888	0.761429	0.811888	0.421891	0.538869	0.916996	0.611599	0.446055	0.339304
1	0.746129	0.746129	0.794233	0	0.654678	0.942502	0.343924	0.427775	0.254338
1	0.794233	0.77744	0.77744	0	0.643392	0.942502	0.339304	0.421891	0.268987
1	0.811888	0.746129	0.830497	0.45237	0.53077	0.916996	0.621874	0.446055	0.308592
1	0.746129	0.746129	0.794233	0	0.654678	0.942502	0.343924	0.427775	0.250771
1	0.811888	0.761429	0.811888	0.421891	0.538869	0.916996	0.611599	0.439853	0.353354
1	0.830497	0.746129	0.811888	0.410418	0.555662	0.916996	0.621874	0.46536	0.325805
1	0.794233	0.77744	0.77744	0.427775	0.478859	0.916996	0.632465	0.632465	0.339304
1	0.830497	0.731481	0.811888	0.427775	0.547163	0.916996	0.811888	0.522858	0.325805
1	0.830497	0.731481	0.811888	0.433761	0.547163	0.916996	0.811888	0.515123	0.32142
1	0.77744	0.666346	0.472043	0	0.472043	0.916996	0.794233	0.53077	0.28822
1	0.830497	0.731481	0.811888	0.427775	0.547163	0.916996	0.811888	0.515123	0.325805
1	0.794233	0.761429	0.77744	0.433761	0.478859	0.942502	0.643392	0.621874	0.339304
1	0.830497	0.731481	0.811888	0.427775	0.547163	0.916996	0.811888	0.515123	0.325805
1	0.830497	0.731481	0.811888	0.427775	0.547163	0.916996	0.811888	0.522858	0.32142
1	0.746129	0.746129	0.77744	0	0.654678	0.916996	0.343924	0.421891	0.243747
1	0.77744	0.666346	0.478859	0	0.472043	0.916996	0.794233	0.53077	0.284286
1	0.794233	0.761429	0.761429	0.433761	0.485813	0.942502	0.632465	0.632465	0.325805
1	0.794233	0.761429	0.761429	0.439853	0.478859	0.942502	0.632465	0.632465	0.325805
1	0.811888	0.746129	0.830497	0.439853	0.538869	0.916996	0.611599	0.458804	0.312815
1	0.830497	0.746129	0.811888	0.410418	0.555662	0.916996	0.621874	0.472043	0.32142
1	0.746129	0.746129	0.77744	0	0.654678	0.916996	0.343924	0.421891	0.250771
1	0.830497	0.761429	0.811888	0.421891	0.538869	0.916996	0.611599	0.439853	0.348607
1	0.830497	0.761429	0.811888	0.416107	0.538869	0.916996	0.611599	0.433761	0.353354
1	0.811888	0.746129	0.830497	0.446055	0.53077	0.916996	0.611599	0.45237	0.317091
1	0.794233	0.761429	0.77744	0.433761	0.478859	0.942502	0.643392	0.621874	0.339304
1	0.830497	0.746129	0.811888	0.410418	0.555662	0.916996	0.621874	0.472043	0.32142
1	0.830497	0.761429	0.811888	0.427775	0.53077	0.916996	0.601621	0.446055	0.353354
1	0.77744	0.666346	0.472043	0	0.46536	0.916996	0.794233	0.522858	0.28822
1	0.811888	0.761429	0.761429	0.427775	0.485813	0.942502	0.632465	0.621874	0.32142
1	0.830497	0.731481	0.811888	0.427775	0.547163	0.916996	0.811888	0.515123	0.32142
1	0.811888	0.746129	0.830497	0.45237	0.53077	0.916996	0.621874	0.446055	0.308592
1	0.794233	0.761429	0.761429	0.439853	0.478859	0.942502	0.632465	0.632465	0.325805
1	0.811888	0.746129	0.830497	0.458804	0.53077	0.916996	0.621874	0.439853	0.30442
1	0.830497	0.746129	0.811888	0.410418	0.555662	0.916996	0.621874	0.472043	0.325805
1	0.830497	0.761429	0.811888	0.421891	0.538869	0.916996	0.611599	0.439853	0.348607
1	0.830497	0.761429	0.811888	0.421891	0.53077	0.916996	0.601621	0.439853	0.348607
1	0.77744	0.666346	0.478859	0	0.46536	0.916996	0.794233	0.522858	0.284286
1	0.830497	0.731481	0.811888	0.427775	0.547163	0.916996	0.811888	0.515123	0.317091
1	0.761429	0.746129	0.77744	0	0.643392	0.916996	0.339304	0.421891	0.261584
1	0.811888	0.746129	0.830497	0.446055	0.53077	0.916996	0.611599	0.45237	0.317091
1	0.794233	0.77744	0.77744	0.427775	0.478859	0.916996	0.632465	0.632465	0.334745
1	0.794233	0.77744	0.77744	0	0.643392	0.942502	0.334745	0.416107	0.254338
1	0.761429	0.746129	0.77744	0	0.643392	0.916996	0.339304	0.427775	0.257942
1	0.830497	0.77744	0.811888	0.427775	0.53077	0.916996	0.601621	0.439853	0.353354
1	0.77744	0.77744	0.77744	0	0.643392	0.942502	0.330246	0.416107	0.257942
1	0.830497	0.761429	0.811888	0.427775	0.53077	0.916996	0.601621	0.439853	0.348607
1	0.746129	0.746129	0.77744	0	0.654678	0.942502	0.343924	0.421891	0.243747
1	0.794233	0.761429	0.761429	0.433761	0.485813	0.942502	0.632465	0.621874	0.32142
1	0.830497	0.731481	0.811888	0.427775	0.547163	0.916996	0.811888	0.515123	0.317091
1	0.794233	0.77744	0.77744	0	0.643392	0.942502	0.334745	0.421891	0.280397
1	0.77744	0.666346	0.478859	0	0.472043	0.916996	0.794233	0.53077	0.28822
1	0.77744	0.77744	0.77744	0	0.643392	0.942502	0.330246	0.416107	0.265266
1	0.830497	0.731481	0.811888	0.427775	0.547163	0.916996	0.811888	0.507558	0.32142
1	0.77744	0.666346	0.472043	0	0.46536	0.916996	0.794233	0.522858	0.284286
1	0.811888	0.761429	0.761429	0.433761	0.485813	0.942502	0.632465	0.632465	0.32142
1	0.811888	0.761429	0.761429	0.427775	0.485813	0.942502	0.632465	0.621874	0.32142
1	0.811888	0.746129	0.811888	0.458804	0.53077	0.916996	0.621874	0.446055	0.300298
1	0.830497	0.761429	0.811888	0.427775	0.538869	0.916996	0.611599	0.446055	0.339304
1	0.811888	0.746129	0.830497	0.458804	0.53077	0.916996	0.621874	0.439853	0.300298
1	0.746129	0.731481	0.77744	0	0.666346	0.916996	0.343924	0.421891	0.257942
1	0.794233	0.77744	0.77744	0.427775	0.46536	0.916996	0.632465	0.621874	0.343924
1	0.811888	0.746129	0.830497	0.458804	0.53077	0.916996	0.621874	0.439853	0.300298
1	0.811888	0.761429	0.811888	0.427775	0.538869	0.916996	0.611599	0.446055	0.334745
1	0.811888	0.746129	0.830497	0.439853	0.538869	0.916996	0.611599	0.458804	0.312815
1	0.830497	0.746129	0.811888	0.410418	0.555662	0.916996	0.621874	0.46536	0.330246
1	0.811888	0.746129	0.830497	0.446055	0.53077	0.916996	0.621874	0.446055	0.317091
1	0.830497	0.77744	0.811888	0.421891	0.53077	0.916996	0.601621	0.439853	0.353354
1	0.830497	0.746129	0.811888	0.410418	0.555662	0.916996	0.621874	0.472043	0.32142
1	0.830497	0.77744	0.811888	0.427775	0.53077	0.916996	0.601621	0.439853	0.353354
1	0.77744	0.77744	0.77744	0	0.643392	0.942502	0.334745	0.416107	0.265266
1	0.830497	0.746129	0.811888	0.410418	0.555662	0.916996	0.621874	0.46536	0.325805
1	0.811888	0.746129	0.830497	0.458804	0.53077	0.916996	0.621874	0.439853	0.300298
1	0.830497	0.731481	0.811888	0.427775	0.547163	0.916996	0.811888	0.515123	0.317091
1	0.77744	0.666346	0.472043	0	0.472043	0.916996	0.794233	0.53077	0.28822
1	0.811888	0.746129	0.811888	0.458804	0.53077	0.916996	0.621874	0.446055	0.300298
1	0.77744	0.761429	0.77744	0	0.643392	0.942502	0.343924	0.421891	0.250771
1	0.830497	0.746129	0.811888	0.410418	0.555662	0.916996	0.621874	0.472043	0.32142
1	0.830497	0.731481	0.811888	0.433761	0.547163	0.916996	0.811888	0.515123	0.317091
1	0.77744	0.666346	0.472043	0	0.46536	0.916996	0.794233	0.53077	0.284286
1	0.811888	0.746129	0.811888	0.458804	0.53077	0.916996	0.621874	0.446055	0.300298
1	0.830497	0.746129	0.811888	0.410418	0.555662	0.916996	0.621874	0.46536	0.325805
1	0.794233	0.77744	0.77744	0	0.643392	0.942502	0.334745	0.427775	0.280397
1	0.77744	0.666346	0.472043	0	0.472043	0.916996	0.794233	0.53077	0.28822
1	0.794233	0.77744	0.77744	0	0.643392	0.942502	0.339304	0.421891	0.268987
1	0.830497	0.746129	0.811888	0.410418	0.555662	0.916996	0.621874	0.472043	0.32142
1	0.77744	0.666346	0.478859	0	0.458804	0.916996	0.794233	0.53077	0.280397
1	0.794233	0.761429	0.77744	0.427775	0.478859	0.942502	0.632465	0.621874	0.330246
1	0.77744	0.666346	0.478859	0	0.458804	0.916996	0.794233	0.522858	0.276551
1	0.761429	0.761429	0.77744	0	0.643392	0.916996	0.339304	0.421891	0.272748
1	0.811888	0.746129	0.811888	0.458804	0.53077	0.916996	0.621874	0.446055	0.300298
1	0.830497	0.746129	0.811888	0.410418	0.555662	0.916996	0.621874	0.472043	0.32142
1	0.811888	0.746129	0.830497	0.439853	0.538869	0.916996	0.611599	0.458804	0.312815
1	0.77744	0.666346	0.472043	0	0.472043	0.916996	0.794233	0.522858	0.28822
1	0.794233	0.77744	0.77744	0.427775	0.472043	0.916996	0.621874	0.632465	0.334745
1	0.830497	0.761429	0.811888	0.416107	0.538869	0.916996	0.611599	0.439853	0.348607
1	0.761429	0.761429	0.77744	0	0.643392	0.916996	0.343924	0.421891	0.265266
1	0.794233	0.761429	0.77744	0.433761	0.478859	0.942502	0.643392	0.621874	0.339304
1	0.830497	0.761429	0.811888	0.421891	0.538869	0.916996	0.611599	0.439853	0.348607
1	0.830497	0.746129	0.811888	0.410418	0.555662	0.916996	0.621874	0.472043	0.317091
1	0.830497	0.761429	0.811888	0.416107	0.53077	0.916996	0.601621	0.433761	0.353354
1	0.830497	0.731481	0.811888	0.433761	0.547163	0.916996	0.811888	0.515123	0.317091
1	0.830497	0.731481	0.811888	0.427775	0.547163	0.916996	0.811888	0.515123	0.325805
1	0.77744	0.666346	0.478859	0	0.46536	0.916996	0.794233	0.53077	0.28822
1	0.830497	0.746129	0.811888	0.410418	0.555662	0.916996	0.621874	0.46536	0.325805
1	0.746129	0.731481	0.77744	0	0.666346	0.916996	0.339304	0.421891	0.265266
1	0.794233	0.77744	0.77744	0.421891	0.46536	0.916996	0.632465	0.621874	0.334745
1	0.77744	0.77744	0.77744	0	0.643392	0.942502	0.343924	0.416107	0.265266
1	0.830497	0.731481	0.811888	0.427775	0.547163	0.916996	0.811888	0.515123	0.317091
1	0.811888	0.746129	0.830497	0.439853	0.538869	0.916996	0.611599	0.458804	0.317091
1	0.830497	0.746129	0.811888	0.410418	0.555662	0.916996	0.621874	0.472043	0.317091
1	0.830497	0.731481	0.811888	0.427775	0.547163	0.916996	0.811888	0.515123	0.32142
1	0.811888	0.761429	0.811888	0.427775	0.538869	0.916996	0.611599	0.446055	0.348607
1	0.794233	0.77744	0.77744	0.421891	0.472043	0.942502	0.632465	0.632465	0.343924
1	0.811888	0.746129	0.830497	0.458804	0.53077	0.916996	0.621874	0.439853	0.300298
1	0.830497	0.746129	0.811888	0.410418	0.555662	0.916996	0.621874	0.46536	0.325805
1	0.830497	0.746129	0.811888	0.410418	0.555662	0.916996	0.621874	0.46536	0.325805
1	0.830497	0.746129	0.794233	0.404821	0.555662	0.916996	0.621874	0.478859	0.317091
1	0.811888	0.761429	0.811888	0.427775	0.538869	0.916996	0.611599	0.446055	0.348607
1	0.830497	0.746129	0.811888	0.410418	0.555662	0.916996	0.621874	0.46536	0.325805
1	0.77744	0.666346	0.472043	0	0.472043	0.916996	0.794233	0.53077	0.28822
1	0.830497	0.731481	0.811888	0.433761	0.547163	0.916996	0.811888	0.515123	0.317091
1	0.761429	0.746129	0.794233	0	0.643392	0.916996	0.339304	0.416107	0.247241
1	0.830497	0.761429	0.811888	0.416107	0.53077	0.916996	0.601621	0.433761	0.343924
1	0.77744	0.77744	0.77744	0	0.643392	0.942502	0.343924	0.416107	0.265266
1	0.811888	0.761429	0.761429	0.427775	0.485813	0.916996	0.632465	0.621874	0.32142
1	0.830497	0.731481	0.811888	0.427775	0.547163	0.916996	0.811888	0.522858	0.32142
1	0.811888	0.746129	0.830497	0.439853	0.538869	0.916996	0.611599	0.458804	0.317091
1	0.77744	0.666346	0.472043	0	0.472043	0.916996	0.794233	0.53077	0.28822
1	0.830497	0.746129	0.811888	0.410418	0.555662	0.916996	0.621874	0.472043	0.317091
1	0.830497	0.746129	0.811888	0.404821	0.555662	0.916996	0.621874	0.472043	0.317091
1	0.794233	0.761429	0.77744	0.427775	0.478859	0.942502	0.632465	0.621874	0.330246
1	0.77744	0.761429	0.77744	0	0.643392	0.942502	0.334745	0.421891	0.265266
1	0.794233	0.761429	0.761429	0.433761	0.485813	0.942502	0.632465	0.632465	0.325805
1	0.746129	0.746129	0.794233	0	0.643392	0.916996	0.330246	0.421891	0.254338
1	0.746129	0.746129	0.77744	0	0.654678	0.942502	0.339304	0.416107	0.254338
1	0.830497	0.761429	0.811888	0.427775	0.53077	0.916996	0.601621	0.446055	0.353354
1	0.830497	0.746129	0.811888	0.410418	0.555662	0.916996	0.621874	0.472043	0.317091
1	0.830497	0.731481	0.811888	0.433761	0.547163	0.916996	0.811888	0.515123	0.32142
1	0.830497	0.731481	0.811888	0.427775	0.547163	0.916996	0.811888	0.515123	0.32142
1	0.77744	0.666346	0.478859	0	0.472043	0.916996	0.794233	0.53077	0.284286
1	0.746129	0.746129	0.794233	0	0.643392	0.916996	0.330246	0.421891	0.254338
1	0.811888	0.746129	0.830497	0.458804	0.53077	0.916996	0.621874	0.446055	0.30442
1	0.794233	0.761429	0.77744	0.433761	0.478859	0.942502	0.643392	0.621874	0.343924
1	0.811888	0.761429	0.811888	0.421891	0.538869	0.916996	0.611599	0.446055	0.339304
1	0.830497	0.731481	0.811888	0.427775	0.547163	0.916996	0.811888	0.515123	0.32142
1	0.761429	0.746129	0.77744	0	0.643392	0.942502	0.343924	0.427775	0.265266
1	0.794233	0.761429	0.761429	0.433761	0.478859	0.942502	0.632465	0.632465	0.325805
1	0.746129	0.746129	0.77744	0	0.654678	0.916996	0.339304	0.421891	0.254338
1	0.794233	0.761429	0.761429	0.433761	0.478859	0.942502	0.632465	0.632465	0.325805
1	0.830497	0.746129	0.811888	0.410418	0.555662	0.916996	0.621874	0.46536	0.325805
1	0.830497	0.761429	0.811888	0.421891	0.538869	0.916996	0.611599	0.433761	0.353354
1	0.830497	0.746129	0.811888	0.410418	0.555662	0.916996	0.621874	0.46536	0.325805
1	0.794233	0.761429	0.761429	0.433761	0.478859	0.942502	0.632465	0.632465	0.325805
1	0.830497	0.746129	0.794233	0.404821	0.555662	0.916996	0.621874	0.472043	0.317091
1	0.830497	0.746129	0.811888	0.410418	0.555662	0.916996	0.621874	0.46536	0.325805
1	0.830497	0.746129	0.794233	0.404821	0.555662	0.916996	0.621874	0.472043	0.317091
1	0.830497	0.77744	0.811888	0.421891	0.53077	0.916996	0.601621	0.439853	0.353354
1	0.761429	0.746129	0.77744	0	0.654678	0.942502	0.339304	0.421891	0.265266
1	0.830497	0.746129	0.811888	0.410418	0.555662	0.916996	0.621874	0.46536	0.325805
1	0.746129	0.746129	0.77744	0	0.654678	0.942502	0.339304	0.421891	0.250771
1	0.830497	0.761429	0.811888	0.421891	0.53077	0.916996	0.601621	0.439853	0.348607
1	0.811888	0.761429	0.761429	0.427775	0.485813	0.942502	0.632465	0.621874	0.32142
1	0.811888	0.761429	0.811888	0.421891	0.538869	0.916996	0.611599	0.446055	0.339304
1	0.794233	0.77744	0.77744	0.421891	0.472043	0.942502	0.632465	0.632465	0.343924
1	0.830497	0.746129	0.811888	0.410418	0.555662	0.916996	0.621874	0.472043	0.32142
1	0.830497	0.731481	0.811888	0.427775	0.547163	0.916996	0.811888	0.515123	0.317091
1	0.830497	0.746129	0.811888	0.410418	0.555662	0.916996	0.621874	0.472043	0.325805
1	0.77744	0.77744	0.77744	0	0.643392	0.942502	0.343924	0.421891	0.280397
1	0.830497	0.731481	0.811888	0.427775	0.547163	0.916996	0.811888	0.515123	0.32142
1	0.77744	0.666346	0.478859	0	0.472043	0.916996	0.794233	0.53077	0.284286
1	0.77744	0.666346	0.478859	0	0.46536	0.916996	0.794233	0.53077	0.284286
1	0.830497	0.731481	0.811888	0.427775	0.547163	0.916996	0.811888	0.515123	0.317091
1	0.830497	0.746129	0.811888	0.410418	0.555662	0.916996	0.621874	0.46536	0.325805
1	0.830497	0.731481	0.811888	0.427775	0.547163	0.916996	0.811888	0.515123	0.32142
1	0.77744	0.666346	0.472043	0	0.46536	0.916996	0.794233	0.522858	0.28822
1	0.811888	0.746129	0.830497	0.439853	0.538869	0.916996	0.611599	0.458804	0.312815
1	0.811888	0.746129	0.830497	0.458804	0.53077	0.916996	0.621874	0.439853	0.300298
1	0.811888	0.761429	0.811888	0.427775	0.538869	0.916996	0.611599	0.446055	0.343924
1	0.830497	0.746129	0.811888	0.410418	0.555662	0.916996	0.621874	0.472043	0.32142
1	0.77744	0.666346	0.472043	0	0.46536	0.916996	0.794233	0.522858	0.28822
1	0.761429	0.746129	0.77744	0	0.643392	0.942502	0.343924	0.427775	0.268987
1	0.830497	0.731481	0.811888	0.427775	0.547163	0.916996	0.811888	0.515123	0.325805
1	0.811888	0.746129	0.830497	0.458804	0.53077	0.916996	0.621874	0.439853	0.30442
1	0.794233	0.761429	0.77744	0.421891	0.472043	0.916996	0.632465	0.621874	0.334745
1	0.830497	0.731481	0.811888	0.427775	0.547163	0.916996	0.811888	0.515123	0.325805
1	0.830497	0.761429	0.811888	0.410418	0.53077	0.916996	0.601621	0.433761	0.343924
1	0.794233	0.761429	0.77744	0.421891	0.46536	0.916996	0.632465	0.621874	0.334745
1	0.811888	0.746129	0.830497	0.439853	0.538869	0.916996	0.611599	0.458804	0.312815
1	0.811888	0.761429	0.811888	0.427775	0.538869	0.916996	0.611599	0.446055	0.348607
1	0.830497	0.761429	0.811888	0.410418	0.53077	0.916996	0.601621	0.433761	0.343924
1	0.77744	0.666346	0.472043	0	0.46536	0.916996	0.794233	0.522858	0.284286
1	0.811888	0.761429	0.811888	0.421891	0.538869	0.916996	0.611599	0.433761	0.353354
1	0.77744	0.666346	0.478859	0	0.458804	0.916996	0.794233	0.522858	0.276551
1	0.811888	0.746129	0.830497	0.458804	0.53077	0.916996	0.621874	0.446055	0.300298
1	0.77744	0.666346	0.478859	0	0.472043	0.916996	0.794233	0.53077	0.284286
1	0.77744	0.666346	0.478859	0	0.46536	0.916996	0.794233	0.522858	0.280397
1	0.746129	0.746129	0.77744	0	0.654678	0.916996	0.343924	0.421891	0.247241
1	0.811888	0.746129	0.830497	0.439853	0.538869	0.916996	0.611599	0.45237	0.312815
1	0.811888	0.746129	0.830497	0.439853	0.538869	0.916996	0.611599	0.458804	0.312815
1	0.830497	0.746129	0.811888	0.410418	0.555662	0.916996	0.621874	0.472043	0.32142
1	0.830497	0.761429	0.811888	0.421891	0.538869	0.916996	0.611599	0.439853	0.348607
1	0.830497	0.731481	0.811888	0.427775	0.547163	0.916996	0.811888	0.515123	0.325805
1	0.811888	0.761429	0.761429	0.427775	0.485813	0.942502	0.632465	0.621874	0.32142
1	0.830497	0.746129	0.811888	0.410418	0.555662	0.916996	0.621874	0.46536	0.325805
1	0.77744	0.666346	0.478859	0	0.46536	0.916996	0.794233	0.522858	0.280397
1	0.830497	0.731481	0.811888	0.433761	0.547163	0.916996	0.811888	0.515123	0.317091
1	0.794233	0.77744	0.77744	0	0.643392	0.942502	0.334745	0.416107	0.257942
1	0.77744	0.666346	0.478859	0	0.46536	0.916996	0.794233	0.53077	0.284286
1	0.830497	0.761429	0.811888	0.427775	0.53077	0.916996	0.601621	0.439853	0.348607
1	0.77744	0.77744	0.77744	0	0.643392	0.942502	0.339304	0.421891	0.254338
1	0.830497	0.731481	0.811888	0.427775	0.547163	0.916996	0.811888	0.515123	0.32142
1	0.77744	0.666346	0.478859	0	0.46536	0.916996	0.794233	0.53077	0.284286
1	0.830497	0.77744	0.811888	0.421891	0.53077	0.916996	0.601621	0.439853	0.348607
1	0.830497	0.731481	0.811888	0.427775	0.547163	0.916996	0.811888	0.515123	0.317091
1	0.811888	0.761429	0.811888	0.427775	0.538869	0.916996	0.611599	0.446055	0.348607
1	0.811888	0.746129	0.830497	0.439853	0.538869	0.916996	0.611599	0.45237	0.317091
1	0.761429	0.746129	0.794233	0	0.654678	0.916996	0.334745	0.416107	0.250771
1	0.77744	0.666346	0.472043	0	0.46536	0.916996	0.794233	0.522858	0.284286
1	0.794233	0.761429	0.761429	0.439853	0.478859	0.916996	0.632465	0.632465	0.330246
1	0.794233	0.77744	0.77744	0.427775	0.485813	0.916996	0.632465	0.632465	0.330246
1	0.811888	0.761429	0.761429	0.433761	0.485813	0.942502	0.632465	0.621874	0.32142
1	0.794233	0.77744	0.77744	0.427775	0.46536	0.916996	0.632465	0.632465	0.334745
1	0.794233	0.77744	0.77744	0	0.643392	0.942502	0.339304	0.421891	0.265266
1	0.811888	0.746129	0.830497	0.458804	0.53077	0.916996	0.621874	0.446055	0.300298
1	0.746129	0.731481	0.77744	0	0.654678	0.916996	0.339304	0.416107	0.261584
1	0.811888	0.746129	0.830497	0.446055	0.53077	0.916996	0.611599	0.446055	0.317091
1	0.830497	0.761429	0.811888	0.416107	0.538869	0.916996	0.611599	0.433761	0.348607
1	0.811888	0.761429	0.811888	0.427775	0.538869	0.916996	0.611599	0.446055	0.339304
1	0.830497	0.761429	0.811888	0.421891	0.53077	0.916996	0.601621	0.439853	0.348607
1	0.830497	0.746129	0.794233	0.410418	0.555662	0.916996	0.621874	0.472043	0.317091
1	0.794233	0.761429	0.77744	0.427775	0.472043	0.942502	0.632465	0.621874	0.334745
1	0.830497	0.761429	0.811888	0.421891	0.53077	0.916996	0.601621	0.433761	0.348607
1	0.77744	0.666346	0.472043	0	0.46536	0.916996	0.794233	0.522858	0.284286
1	0.77744	0.666346	0.478859	0	0.472043	0.916996	0.794233	0.53077	0.284286
1	0.830497	0.746129	0.811888	0.410418	0.555662	0.916996	0.621874	0.46536	0.325805
1	0.746129	0.746129	0.77744	0	0.654678	0.942502	0.339304	0.427775	0.250771
1	0.794233	0.761429	0.77744	0.427775	0.485813	0.916996	0.643392	0.621874	0.339304
1	0.811888	0.746129	0.811888	0.458804	0.53077	0.916996	0.621874	0.446055	0.300298
1	0.830497	0.746129	0.811888	0.410418	0.555662	0.916996	0.621874	0.472043	0.32142
1	0.77744	0.666346	0.478859	0	0.472043	0.916996	0.794233	0.53077	0.284286
1	0.830497	0.746129	0.811888	0.410418	0.555662	0.916996	0.621874	0.46536	0.325805
1	0.794233	0.761429	0.761429	0.439853	0.478859	0.942502	0.632465	0.632465	0.330246
1	0.830497	0.77744	0.811888	0.421891	0.53077	0.916996	0.601621	0.439853	0.353354
1	0.830497	0.731481	0.811888	0.427775	0.547163	0.916996	0.811888	0.522858	0.325805
1	0.811888	0.746129	0.830497	0.458804	0.53077	0.916996	0.621874	0.439853	0.300298
1	0.811888	0.746129	0.830497	0.439853	0.53077	0.916996	0.621874	0.45237	0.317091
1	0.811888	0.746129	0.811888	0.458804	0.53077	0.916996	0.621874	0.446055	0.300298
1	0.830497	0.761429	0.811888	0.427775	0.53077	0.916996	0.601621	0.439853	0.353354
1	0.830497	0.731481	0.811888	0.427775	0.547163	0.916996	0.811888	0.515123	0.32142
1	0.811888	0.746129	0.830497	0.458804	0.53077	0.916996	0.621874	0.446055	0.30442
1	0.794233	0.761429	0.77744	0.433761	0.478859	0.942502	0.643392	0.621874	0.339304
1	0.811888	0.761429	0.811888	0.427775	0.538869	0.916996	0.611599	0.446055	0.339304
1	0.811888	0.746129	0.811888	0.458804	0.53077	0.916996	0.621874	0.446055	0.300298
1	0.77744	0.666346	0.472043	0	0.46536	0.916996	0.794233	0.522858	0.284286
1	0.794233	0.77744	0.77744	0.421891	0.478859	0.916996	0.632465	0.632465	0.334745
1	0.746129	0.746129	0.77744	0	0.654678	0.942502	0.343924	0.421891	0.257942
1	0.830497	0.77744	0.811888	0.416107	0.53077	0.916996	0.601621	0.433761	0.353354
1	0.811888	0.746129	0.830497	0.439853	0.53077	0.916996	0.611599	0.45237	0.317091
1	0.746129	0.746129	0.77744	0	0.654678	0.916996	0.343924	0.416107	0.247241
1	0.830497	0.731481	0.811888	0.433761	0.547163	0.916996	0.811888	0.515123	0.32142
1	0.830497	0.731481	0.811888	0.427775	0.547163	0.916996	0.811888	0.507558	0.32142
1	0.761429	0.746129	0.77744	0	0.654678	0.942502	0.343924	0.421891	0.265266
1	0.794233	0.77744	0.77744	0.427775	0.46536	0.916996	0.632465	0.621874	0.339304
1	0.794233	0.77744	0.77744	0	0.643392	0.942502	0.339304	0.427775	0.280397
1	0.811888	0.761429	0.811888	0.421891	0.538869	0.916996	0.611599	0.439853	0.343924
1	0.830497	0.731481	0.811888	0.427775	0.547163	0.916996	0.811888	0.515123	0.317091
1	0.811888	0.761429	0.811888	0.421891	0.538869	0.916996	0.611599	0.446055	0.343924
1	0.794233	0.77744	0.77744	0.427775	0.492909	0.916996	0.632465	0.621874	0.343924
1	0.761429	0.746129	0.77744	0	0.643392	0.916996	0.339304	0.421891	0.261584
1	0.830497	0.746129	0.811888	0.410418	0.555662	0.916996	0.621874	0.472043	0.32142
1	0.830497	0.731481	0.811888	0.427775	0.547163	0.916996	0.811888	0.515123	0.32142
1	0.761429	0.746129	0.794233	0	0.643392	0.916996	0.334745	0.421891	0.257942
1	0.794233	0.761429	0.761429	0.439853	0.485813	0.942502	0.632465	0.632465	0.325805
1	0.746129	0.746129	0.794233	0	0.654678	0.942502	0.343924	0.427775	0.254338
1	0.830497	0.77744	0.811888	0.421891	0.53077	0.916996	0.601621	0.433761	0.348607
1	0.746129	0.746129	0.794233	0	0.654678	0.916996	0.339304	0.421891	0.254338
1	0.811888	0.761429	0.811888	0.421891	0.538869	0.916996	0.611599	0.446055	0.343924
1	0.811888	0.761429	0.811888	0.427775	0.538869	0.916996	0.611599	0.446055	0.348607
1	0.794233	0.761429	0.77744	0.433761	0.478859	0.942502	0.643392	0.632465	0.339304
1	0.830497	0.731481	0.811888	0.427775	0.547163	0.916996	0.811888	0.515123	0.317091
1	0.811888	0.746129	0.811888	0.458804	0.53077	0.916996	0.621874	0.446055	0.300298
1	0.830497	0.761429	0.811888	0.421891	0.53077	0.916996	0.601621	0.439853	0.348607
1	0.77744	0.666346	0.478859	0	0.472043	0.916996	0.794233	0.53077	0.28822
1	0.77744	0.666346	0.478859	0	0.46536	0.916996	0.794233	0.522858	0.280397
1	0.830497	0.761429	0.811888	0.421891	0.53077	0.916996	0.601621	0.439853	0.348607
1	0.77744	0.761429	0.77744	0	0.643392	0.942502	0.343924	0.421891	0.265266
1	0.794233	0.761429	0.761429	0.439853	0.478859	0.942502	0.632465	0.632465	0.325805
1	0.830497	0.761429	0.811888	0.421891	0.53077	0.916996	0.601621	0.439853	0.353354
1	0.811888	0.746129	0.830497	0.439853	0.538869	0.916996	0.611599	0.458804	0.312815
1	0.77744	0.77744	0.77744	0	0.643392	0.942502	0.339304	0.410418	0.268987
1	0.746129	0.731481	0.77744	0	0.666346	0.916996	0.343924	0.421891	0.257942
1	0.830497	0.746129	0.811888	0.410418	0.555662	0.916996	0.621874	0.46536	0.325805
1	0.794233	0.761429	0.77744	0	0.643392	0.942502	0.343924	0.421891	0.268987
1	0.794233	0.761429	0.761429	0.439853	0.485813	0.942502	0.632465	0.632465	0.325805
1	0.830497	0.746129	0.811888	0.410418	0.555662	0.916996	0.621874	0.46536	0.325805
1	0.77744	0.666346	0.472043	0	0.46536	0.916996	0.794233	0.522858	0.28822
1	0.811888	0.746129	0.830497	0.439853	0.53077	0.916996	0.621874	0.45237	0.317091
1	0.794233	0.761429	0.761429	0.439853	0.478859	0.916996	0.632465	0.632465	0.330246
1	0.811888	0.746129	0.830497	0.439853	0.53077	0.916996	0.611599	0.45237	0.312815
1	0.77744	0.666346	0.472043	0	0.472043	0.916996	0.794233	0.53077	0.28822
1	0.830497	0.761429	0.811888	0.421891	0.538869	0.916996	0.611599	0.439853	0.348607
1	0.830497	0.746129	0.811888	0.410418	0.555662	0.916996	0.621874	0.46536	0.325805
1	0.811888	0.746129	0.830497	0.439853	0.538869	0.916996	0.611599	0.458804	0.312815
1	0.794233	0.77744	0.77744	0.427775	0.478859	0.916996	0.632465	0.632465	0.334745
1	0.77744	0.666346	0.478859	0	0.46536	0.916996	0.794233	0.522858	0.280397
1	0.830497	0.761429	0.811888	0.427775	0.53077	0.916996	0.601621	0.446055	0.353354
1	0.811888	0.761429	0.811888	0.421891	0.538869	0.916996	0.611599	0.439853	0.348607
1	0.77744	0.77744	0.77744	0	0.643392	0.942502	0.339304	0.421891	0.257942
1	0.830497	0.77744	0.811888	0.427775	0.53077	0.916996	0.601621	0.439853	0.353354
1	0.811888	0.746129	0.830497	0.439853	0.538869	0.916996	0.611599	0.45237	0.312815
1	0.746129	0.746129	0.794233	0	0.643392	0.916996	0.339304	0.416107	0.247241
1	0.830497	0.746129	0.811888	0.410418	0.555662	0.916996	0.621874	0.46536	0.325805
1	0.77744	0.666346	0.472043	0	0.472043	0.916996	0.794233	0.53077	0.28822
1	0.811888	0.761429	0.811888	0.427775	0.538869	0.916996	0.611599	0.446055	0.339304
1	0.830497	0.746129	0.794233	0.404821	0.555662	0.916996	0.621874	0.478859	0.317091
1	0.830497	0.746129	0.811888	0.410418	0.555662	0.916996	0.621874	0.46536	0.325805
1	0.830497	0.731481	0.811888	0.433761	0.547163	0.916996	0.811888	0.515123	0.32142
1	0.830497	0.746129	0.794233	0.410418	0.555662	0.916996	0.621874	0.472043	0.317091
1	0.811888	0.746129	0.830497	0.439853	0.53077	0.916996	0.621874	0.45237	0.317091
1	0.794233	0.761429	0.761429	0.433761	0.478859	0.942502	0.632465	0.632465	0.325805
1	0.811888	0.761429	0.811888	0.421891	0.538869	0.916996	0.611599	0.439853	0.353354
1	0.830497	0.731481	0.811888	0.433761	0.547163	0.916996	0.811888	0.515123	0.32142
1	0.746129	0.746129	0.794233	0	0.654678	0.916996	0.339304	0.416107	0.247241
1	0.77744	0.666346	0.472043	0	0.46536	0.916996	0.794233	0.522858	0.284286
1	0.830497	0.761429	0.811888	0.421891	0.53077	0.916996	0.601621	0.439853	0.353354
1	0.830497	0.77744	0.811888	0.421891	0.53077	0.916996	0.601621	0.439853	0.353354
1	0.77744	0.666346	0.472043	0	0.46536	0.916996	0.794233	0.522858	0.28822
1	0.746129	0.746129	0.794233	0	0.643392	0.916996	0.330246	0.421891	0.257942
1	0.794233	0.77744	0.77744	0.427775	0.472043	0.942502	0.632465	0.621874	0.339304
1	0.77744	0.761429	0.77744	0	0.643392	0.916996	0.339304	0.416107	0.268987
1	0.811888	0.746129	0.830497	0.446055	0.53077	0.916996	0.611599	0.446055	0.317091
1	0.811888	0.746129	0.811888	0.458804	0.53077	0.916996	0.621874	0.446055	0.300298
1	0.830497	0.746129	0.811888	0.410418	0.555662	0.916996	0.621874	0.472043	0.32142
1	0.830497	0.731481	0.811888	0.433761	0.547163	0.916996	0.811888	0.515123	0.317091
1	0.811888	0.746129	0.811888	0.458804	0.53077	0.916996	0.621874	0.446055	0.300298
1	0.77744	0.666346	0.472043	0	0.46536	0.916996	0.794233	0.522858	0.284286
1	0.761429	0.746129	0.794233	0	0.643392	0.916996	0.334745	0.421891	0.257942
1	0.830497	0.746129	0.811888	0.410418	0.555662	0.916996	0.621874	0.472043	0.317091
1	0.794233	0.77744	0.77744	0.427775	0.472043	0.942502	0.632465	0.632465	0.339304
1	0.830497	0.731481	0.811888	0.427775	0.547163	0.916996	0.811888	0.515123	0.32142
1	0.77744	0.666346	0.472043	0	0.472043	0.916996	0.794233	0.522858	0.284286
1	0.746129	0.731481	0.77744	0	0.654678	0.916996	0.343924	0.421891	0.257942
1	0.77744	0.666346	0.472043	0	0.46536	0.916996	0.794233	0.522858	0.28822
1	0.746129	0.746129	0.77744	0	0.654678	0.916996	0.339304	0.421891	0.250771
1	0.830497	0.731481	0.811888	0.427775	0.547163	0.916996	0.811888	0.515123	0.325805
1	0.830497	0.731481	0.811888	0.427775	0.547163	0.916996	0.811888	0.515123	0.325805
1	0.830497	0.731481	0.811888	0.427775	0.547163	0.916996	0.811888	0.515123	0.325805
1	0.811888	0.761429	0.761429	0.427775	0.485813	0.942502	0.632465	0.621874	0.32142
1	0.77744	0.666346	0.478859	0	0.46536	0.916996	0.794233	0.53077	0.28822
1	0.830497	0.746129	0.811888	0.410418	0.555662	0.916996	0.621874	0.472043	0.317091
1	0.794233	0.77744	0.77744	0.427775	0.46536	0.916996	0.632465	0.621874	0.343924
1	0.794233	0.761429	0.77744	0.427775	0.478859	0.916996	0.632465	0.621874	0.334745
1	0.77744	0.761429	0.77744	0	0.643392	0.916996	0.339304	0.416107	0.268987
1	0.830497	0.746129	0.811888	0.410418	0.555662	0.916996	0.621874	0.46536	0.325805
1	0.830497	0.761429	0.811888	0.421891	0.538869	0.916996	0.611599	0.439853	0.348607
1	0.77744	0.77744	0.77744	0	0.643392	0.942502	0.334745	0.421891	0.261584
1	0.794233	0.77744	0.77744	0.427775	0.46536	0.916996	0.632465	0.632465	0.334745
1	0.77744	0.666346	0.478859	0	0.458804	0.916996	0.794233	0.522858	0.276551
1	0.830497	0.731481	0.811888	0.427775	0.547163	0.916996	0.811888	0.515123	0.325805
1	0.830497	0.731481	0.811888	0.427775	0.547163	0.916996	0.811888	0.515123	0.325805
1	0.794233	0.77744	0.77744	0.427775	0.46536	0.916996	0.632465	0.621874	0.339304
1	0.830497	0.746129	0.811888	0.410418	0.555662	0.916996	0.621874	0.46536	0.325805
1	0.811888	0.746129	0.830497	0.446055	0.53077	0.916996	0.621874	0.45237	0.317091
1	0.794233	0.761429	0.77744	0.433761	0.485813	0.916996	0.643392	0.621874	0.339304
1	0.761429	0.761429	0.77744	0	0.643392	0.942502	0.343924	0.421891	0.265266
1	0.811888	0.746129	0.830497	0.439853	0.538869	0.916996	0.611599	0.458804	0.317091
1	0.77744	0.666346	0.478859	0	0.46536	0.916996	0.794233	0.53077	0.284286
1	0.794233	0.77744	0.77744	0.427775	0.478859	0.942502	0.632465	0.632465	0.334745
1	0.794233	0.761429	0.77744	0.421891	0.472043	0.916996	0.632465	0.621874	0.334745
1	0.77744	0.666346	0.478859	0	0.46536	0.916996	0.794233	0.53077	0.284286
1	0.830497	0.731481	0.811888	0.427775	0.547163	0.916996	0.811888	0.515123	0.325805
1	0.77744	0.666346	0.478859	0	0.472043	0.916996	0.794233	0.53077	0.284286
1	0.77744	0.761429	0.77744	0	0.643392	0.942502	0.334745	0.416107	0.268987
1	0.746129	0.746129	0.794233	0	0.654678	0.916996	0.330246	0.421891	0.250771
1	0.811888	0.746129	0.830497	0.439853	0.53077	0.916996	0.621874	0.45237	0.312815
1	0.811888	0.746129	0.830497	0.45237	0.53077	0.916996	0.621874	0.446055	0.308592
1	0.811888	0.746129	0.830497	0.439853	0.53077	0.916996	0.611599	0.45237	0.317091
1	0.830497	0.746129	0.811888	0.410418	0.555662	0.916996	0.621874	0.46536	0.325805
1	0.830497	0.761429	0.811888	0.421891	0.53077	0.916996	0.601621	0.439853	0.348607
1	0.830497	0.731481	0.811888	0.427775	0.547163	0.916996	0.811888	0.515123	0.317091
1	0.830497	0.746129	0.811888	0.410418	0.555662	0.916996	0.621874	0.472043	0.32142
1	0.77744	0.761429	0.77744	0	0.643392	0.942502	0.334745	0.416107	0.268987
1	0.830497	0.746129	0.794233	0.410418	0.555662	0.916996	0.621874	0.472043	0.317091
1	0.77744	0.666346	0.478859	0	0.472043	0.916996	0.794233	0.53077	0.284286
1	0.77744	0.666346	0.478859	0	0.46536	0.916996	0.794233	0.53077	0.284286
1	0.77744	0.666346	0.478859	0	0.458804	0.916996	0.794233	0.522858	0.276551
1	0.830497	0.746129	0.811888	0.410418	0.555662	0.916996	0.621874	0.46536	0.325805
1	0.811888	0.746129	0.830497	0.458804	0.53077	0.916996	0.621874	0.446055	0.300298
1	0.811888	0.761429	0.811888	0.421891	0.538869	0.916996	0.611599	0.439853	0.348607
1	0.811888	0.746129	0.830497	0.439853	0.538869	0.916996	0.611599	0.45237	0.312815
1	0.811888	0.761429	0.811888	0.427775	0.538869	0.916996	0.611599	0.439853	0.339304
1	0.830497	0.731481	0.811888	0.427775	0.547163	0.916996	0.811888	0.515123	0.32142
1	0.77744	0.666346	0.478859	0	0.472043	0.916996	0.794233	0.53077	0.284286
1	0.811888	0.761429	0.811888	0.427775	0.538869	0.916996	0.611599	0.446055	0.334745
1	0.77744	0.666346	0.478859	0	0.472043	0.916996	0.794233	0.53077	0.284286
1	0.830497	0.761429	0.811888	0.416107	0.53077	0.916996	0.601621	0.433761	0.343924
1	0.830497	0.731481	0.811888	0.427775	0.547163	0.916996	0.811888	0.515123	0.317091
1	0.830497	0.761429	0.811888	0.416107	0.53077	0.916996	0.601621	0.433761	0.343924
1	0.77744	0.761429	0.77744	0	0.643392	0.916996	0.339304	0.410418	0.272748
1	0.77744	0.761429	0.77744	0	0.643392	0.942502	0.330246	0.421891	0.268987
1	0.811888	0.746129	0.830497	0.439853	0.53077	0.916996	0.621874	0.45237	0.317091
1	0.811888	0.746129	0.811888	0.458804	0.53077	0.916996	0.621874	0.446055	0.300298
1	0.811888	0.761429	0.761429	0.427775	0.485813	0.916996	0.632465	0.621874	0.325805
1	0.746129	0.731481	0.77744	0	0.666346	0.916996	0.343924	0.421891	0.254338
1	0.77744	0.77744	0.77744	0	0.643392	0.942502	0.330246	0.416107	0.265266
1	0.830497	0.731481	0.811888	0.427775	0.547163	0.916996	0.811888	0.515123	0.32142
1	0.830497	0.731481	0.811888	0.427775	0.547163	0.916996	0.811888	0.522858	0.325805
1	0.77744	0.761429	0.77744	0	0.643392	0.942502	0.343924	0.421891	0.250771
1	0.794233	0.77744	0.77744	0	0.643392	0.942502	0.343924	0.421891	0.265266
1	0.77744	0.666346	0.472043	0	0.46536	0.916996	0.794233	0.522858	0.28822
1	0.830497	0.731481	0.811888	0.427775	0.547163	0.916996	0.811888	0.515123	0.32142
1	0.77744	0.77744	0.77744	0	0.643392	0.942502	0.334745	0.416107	0.261584
1	0.77744	0.666346	0.478859	0	0.46536	0.916996	0.794233	0.53077	0.28822
1	0.830497	0.731481	0.811888	0.427775	0.547163	0.916996	0.811888	0.515123	0.325805
1	0.761429	0.746129	0.77744	0	0.643392	0.942502	0.343924	0.427775	0.265266
1	0.77744	0.666346	0.472043	0	0.46536	0.916996	0.794233	0.522858	0.280397
1	0.794233	0.761429	0.761429	0.433761	0.485813	0.942502	0.632465	0.632465	0.325805
1	0.77744	0.666346	0.472043	0	0.472043	0.916996	0.794233	0.53077	0.28822
1	0.794233	0.761429	0.77744	0.433761	0.478859	0.942502	0.643392	0.632465	0.334745
1	0.811888	0.761429	0.761429	0.427775	0.485813	0.916996	0.632465	0.621874	0.32142
1	0.746129	0.731481	0.77744	0	0.654678	0.916996	0.339304	0.416107	0.261584
1	0.811888	0.746129	0.830497	0.458804	0.53077	0.916996	0.621874	0.439853	0.300298
1	0.794233	0.77744	0.77744	0.427775	0.472043	0.942502	0.632465	0.632465	0.343924
1	0.811888	0.761429	0.811888	0.427775	0.538869	0.916996	0.611599	0.446055	0.343924
1	0.77744	0.666346	0.478859	0	0.458804	0.916996	0.794233	0.522858	0.280397
1	0.77744	0.666346	0.472043	0	0.472043	0.916996	0.794233	0.53077	0.28822
1	0.830497	0.746129	0.811888	0.410418	0.555662	0.916996	0.621874	0.472043	0.317091
1	0.794233	0.77744	0.77744	0.427775	0.46536	0.916996	0.632465	0.621874	0.334745
1	0.830497	0.77744	0.811888	0.421891	0.53077	0.916996	0.601621	0.439853	0.353354
1	0.811888	0.761429	0.811888	0.427775	0.538869	0.916996	0.611599	0.446055	0.348607
1	0.811888	0.746129	0.830497	0.439853	0.538869	0.916996	0.611599	0.458804	0.312815
1	0.77744	0.77744	0.77744	0	0.643392	0.942502	0.343924	0.421891	0.276551
1	0.794233	0.761429	0.761429	0.433761	0.478859	0.942502	0.632465	0.632465	0.325805
1	0.794233	0.77744	0.77744	0.421891	0.485813	0.916996	0.632465	0.621874	0.339304
1	0.794233	0.761429	0.761429	0.439853	0.478859	0.916996	0.632465	0.632465	0.330246
1	0.811888	0.746129	0.811888	0.458804	0.53077	0.916996	0.621874	0.446055	0.300298
1	0.830497	0.761429	0.811888	0.421891	0.53077	0.916996	0.601621	0.439853	0.353354
1	0.761429	0.746129	0.77744	0	0.643392	0.942502	0.343924	0.427775	0.265266
1	0.794233	0.77744	0.77744	0.427775	0.46536	0.916996	0.632465	0.621874	0.334745
1	0.794233	0.761429	0.761429	0.433761	0.485813	0.942502	0.632465	0.632465	0.325805
1	0.830497	0.746129	0.811888	0.410418	0.555662	0.916996	0.621874	0.46536	0.325805
1	0.811888	0.746129	0.830497	0.458804	0.53077	0.916996	0.621874	0.446055	0.30442
1	0.794233	0.761429	0.77744	0	0.643392	0.942502	0.339304	0.421891	0.268987
1	0.794233	0.761429	0.77744	0.433761	0.478859	0.942502	0.643392	0.632465	0.339304
1	0.794233	0.761429	0.761429	0.439853	0.478859	0.942502	0.632465	0.632465	0.325805
1	0.811888	0.746129	0.811888	0.458804	0.53077	0.916996	0.621874	0.446055	0.300298
1	0.794233	0.761429	0.761429	0.433761	0.485813	0.942502	0.632465	0.621874	0.325805
1	0.77744	0.666346	0.472043	0	0.472043	0.916996	0.794233	0.53077	0.28822
1	0.830497	0.731481	0.811888	0.433761	0.547163	0.916996	0.811888	0.515123	0.317091
1	0.761429	0.746129	0.77744	0	0.654678	0.942502	0.348607	0.416107	0.268987
1	0.811888	0.761429	0.811888	0.427775	0.538869	0.916996	0.611599	0.446055	0.334745
1	0.830497	0.746129	0.811888	0.410418	0.555662	0.916996	0.621874	0.46536	0.325805
1	0.794233	0.761429	0.77744	0	0.643392	0.942502	0.343924	0.421891	0.268987
1	0.811888	0.746129	0.830497	0.439853	0.538869	0.916996	0.611599	0.458804	0.317091
1	0.830497	0.746129	0.811888	0.410418	0.555662	0.916996	0.621874	0.472043	0.317091
1	0.794233	0.761429	0.761429	0.439853	0.478859	0.916996	0.632465	0.632465	0.330246
1	0.811888	0.746129	0.830497	0.446055	0.53077	0.916996	0.611599	0.446055	0.317091
1	0.811888	0.746129	0.830497	0.439853	0.53077	0.916996	0.621874	0.45237	0.317091
1	0.830497	0.731481	0.811888	0.427775	0.547163	0.916996	0.811888	0.522858	0.32142
1	0.830497	0.731481	0.811888	0.427775	0.547163	0.916996	0.811888	0.515123	0.32142
1	0.830497	0.731481	0.811888	0.427775	0.547163	0.916996	0.811888	0.515123	0.32142
1	0.830497	0.761429	0.811888	0.416107	0.53077	0.916996	0.601621	0.433761	0.343924
1	0.811888	0.761429	0.761429	0.433761	0.485813	0.942502	0.632465	0.621874	0.32142
1	0.746129	0.731481	0.77744	0	0.654678	0.916996	0.343924	0.421891	0.257942
1	0.77744	0.666346	0.478859	0	0.46536	0.916996	0.794233	0.53077	0.280397
1	0.794233	0.77744	0.77744	0	0.643392	0.942502	0.334745	0.416107	0.257942
1	0.830497	0.731481	0.811888	0.427775	0.547163	0.916996	0.811888	0.515123	0.32142
1	0.830497	0.746129	0.811888	0.410418	0.555662	0.916996	0.621874	0.46536	0.325805
1	0.811888	0.746129	0.811888	0.458804	0.53077	0.916996	0.621874	0.446055	0.300298
1	0.77744	0.77744	0.77744	0	0.643392	0.942502	0.339304	0.416107	0.257942
1	0.794233	0.761429	0.761429	0.439853	0.478859	0.942502	0.632465	0.632465	0.325805
1	0.794233	0.761429	0.761429	0.439853	0.478859	0.942502	0.632465	0.632465	0.325805
1	0.830497	0.746129	0.811888	0.410418	0.555662	0.916996	0.621874	0.46536	0.325805
1	0.811888	0.746129	0.830497	0.439853	0.538869	0.916996	0.611599	0.458804	0.312815
1	0.746129	0.746129	0.77744	0	0.654678	0.916996	0.339304	0.421891	0.250771
1	0.77744	0.761429	0.77744	0	0.643392	0.942502	0.334745	0.421891	0.272748
1	0.746129	0.746129	0.77744	0	0.654678	0.916996	0.339304	0.416107	0.254338
1	0.830497	0.746129	0.811888	0.410418	0.555662	0.916996	0.621874	0.46536	0.330246
1	0.794233	0.77744	0.77744	0	0.643392	0.942502	0.339304	0.427775	0.276551
1	0.830497	0.746129	0.811888	0.410418	0.555662	0.916996	0.621874	0.472043	0.32142
1	0.811888	0.746129	0.811888	0.458804	0.53077	0.916996	0.621874	0.446055	0.300298
1	0.794233	0.761429	0.761429	0.433761	0.478859	0.942502	0.632465	0.632465	0.325805
1	0.811888	0.746129	0.830497	0.439853	0.53077	0.916996	0.611599	0.458804	0.312815
1	0.811888	0.746129	0.830497	0.45237	0.53077	0.916996	0.621874	0.446055	0.308592
1	0.830497	0.746129	0.794233	0.410418	0.555662	0.916996	0.621874	0.472043	0.317091
1	0.761429	0.746129	0.77744	0	0.643392	0.942502	0.343924	0.427775	0.265266
1	0.830497	0.731481	0.811888	0.427775	0.547163	0.916996	0.811888	0.522858	0.325805
1	0.830497	0.746129	0.794233	0.410418	0.555662	0.916996	0.621874	0.472043	0.317091
1	0.77744	0.666346	0.478859	0	0.46536	0.916996	0.794233	0.53077	0.284286
1	0.830497	0.731481	0.811888	0.427775	0.547163	0.916996	0.811888	0.515123	0.32142
1	0.830497	0.746129	0.811888	0.410418	0.555662	0.916996	0.621874	0.472043	0.32142
1	0.811888	0.746129	0.830497	0.446055	0.53077	0.916996	0.611599	0.446055	0.317091
1	0.77744	0.666346	0.478859	0	0.458804	0.916996	0.794233	0.522858	0.280397
1	0.794233	0.77744	0.77744	0	0.643392	0.942502	0.339304	0.421891	0.265266
1	0.830497	0.731481	0.811888	0.427775	0.547163	0.916996	0.811888	0.515123	0.32142
1	0.746129	0.746129	0.794233	0	0.643392	0.916996	0.334745	0.427775	0.254338
1	0.830497	0.731481	0.811888	0.427775	0.547163	0.916996	0.811888	0.515123	0.32142
1	0.830497	0.761429	0.811888	0.421891	0.53077	0.916996	0.601621	0.439853	0.353354
1	0.830497	0.731481	0.811888	0.427775	0.547163	0.916996	0.811888	0.515123	0.325805
1	0.794233	0.761429	0.761429	0.433761	0.485813	0.942502	0.632465	0.632465	0.325805
1	0.830497	0.731481	0.811888	0.427775	0.547163	0.916996	0.811888	0.515123	0.317091
1	0.830497	0.761429	0.811888	0.421891	0.538869	0.916996	0.611599	0.439853	0.348607
1	0.830497	0.761429	0.811888	0.421891	0.53077	0.916996	0.601621	0.439853	0.348607
1	0.811888	0.746129	0.830497	0.439853	0.538869	0.916996	0.611599	0.458804	0.312815
1	0.77744	0.666346	0.472043	0	0.46536	0.916996	0.794233	0.522858	0.28822
1	0.77744	0.666346	0.478859	0	0.458804	0.916996	0.794233	0.522858	0.280397
1	0.830497	0.731481	0.811888	0.427775	0.547163	0.916996	0.811888	0.515123	0.32142
1	0.830497	0.731481	0.811888	0.427775	0.547163	0.916996	0.811888	0.515123	0.317091
1	0.746129	0.746129	0.77744	0	0.654678	0.916996	0.334745	0.421891	0.257942
1	0.794233	0.77744	0.77744	0	0.643392	0.942502	0.334745	0.427775	0.276551
1	0.830497	0.731481	0.811888	0.427775	0.547163	0.916996	0.811888	0.515123	0.325805
1	0.830497	0.731481	0.811888	0.427775	0.547163	0.916996	0.811888	0.515123	0.32142
1	0.77744	0.666346	0.472043	0	0.472043	0.916996	0.794233	0.53077	0.28822
1	0.761429	0.746129	0.794233	0	0.643392	0.916996	0.334745	0.416107	0.254338
1	0.830497	0.761429	0.811888	0.421891	0.53077	0.916996	0.601621	0.439853	0.348607
1	0.830497	0.731481	0.811888	0.427775	0.547163	0.916996	0.811888	0.515123	0.317091
1	0.811888	0.746129	0.830497	0.45237	0.53077	0.916996	0.621874	0.45237	0.308592
1	0.794233	0.77744	0.77744	0.427775	0.458804	0.916996	0.632465	0.632465	0.334745
1	0.794233	0.761429	0.77744	0.433761	0.478859	0.942502	0.643392	0.621874	0.339304
1	0.830497	0.731481	0.811888	0.427775	0.547163	0.916996	0.811888	0.515123	0.325805
1	0.761429	0.746129	0.77744	0	0.654678	0.916996	0.339304	0.421891	0.261584
1	0.830497	0.746129	0.811888	0.410418	0.555662	0.916996	0.621874	0.472043	0.317091
1	0.77744	0.666346	0.472043	0	0.46536	0.916996	0.794233	0.522858	0.284286
1	0.77744	0.666346	0.472043	0	0.46536	0.916996	0.794233	0.522858	0.284286
1	0.794233	0.77744	0.77744	0.427775	0.485813	0.916996	0.632465	0.632465	0.330246
1	0.830497	0.746129	0.811888	0.410418	0.555662	0.916996	0.621874	0.46536	0.325805
1	0.811888	0.761429	0.761429	0.433761	0.485813	0.942502	0.632465	0.621874	0.32142
1	0.811888	0.746129	0.830497	0.446055	0.53077	0.916996	0.611599	0.446055	0.317091
1	0.830497	0.746129	0.811888	0.410418	0.555662	0.916996	0.621874	0.472043	0.32142
1	0.830497	0.731481	0.811888	0.427775	0.547163	0.916996	0.811888	0.515123	0.317091
1	0.811888	0.761429	0.811888	0.427775	0.538869	0.916996	0.611599	0.439853	0.334745
1	0.830497	0.77744	0.811888	0.421891	0.53077	0.916996	0.601621	0.439853	0.353354
1	0.830497	0.746129	0.811888	0.410418	0.555662	0.916996	0.621874	0.472043	0.32142
1	0.830497	0.746129	0.811888	0.404821	0.555662	0.916996	0.621874	0.46536	0.325805
1	0.811888	0.761429	0.811888	0.427775	0.538869	0.916996	0.611599	0.446055	0.334745
1	0.77744	0.77744	0.77744	0	0.643392	0.942502	0.339304	0.421891	0.276551
1	0.746129	0.746129	0.794233	0	0.654678	0.942502	0.339304	0.427775	0.254338
1	0.811888	0.761429	0.761429	0.427775	0.485813	0.916996	0.632465	0.621874	0.32142
1	0.830497	0.731481	0.811888	0.427775	0.547163	0.916996	0.811888	0.515123	0.325805
1	0.77744	0.77744	0.77744	0	0.643392	0.942502	0.339304	0.427775	0.280397
1	0.830497	0.77744	0.811888	0.421891	0.53077	0.916996	0.601621	0.446055	0.348607
1	0.77744	0.666346	0.472043	0	0.472043	0.916996	0.794233	0.53077	0.28822
1	0.77744	0.666346	0.478859	0	0.46536	0.916996	0.794233	0.53077	0.284286
1	0.830497	0.731481	0.811888	0.433761	0.547163	0.916996	0.811888	0.522858	0.32142
1	0.811888	0.761429	0.761429	0.433761	0.485813	0.942502	0.632465	0.621874	0.32142
1	0.830497	0.731481	0.811888	0.427775	0.547163	0.916996	0.811888	0.515123	0.325805
1	0.830497	0.731481	0.811888	0.433761	0.547163	0.916996	0.811888	0.515123	0.317091
1	0.830497	0.77744	0.811888	0.421891	0.53077	0.916996	0.601621	0.433761	0.348607
1	0.830497	0.746129	0.811888	0.410418	0.555662	0.916996	0.621874	0.46536	0.325805
1	0.761429	0.761429	0.77744	0	0.643392	0.916996	0.339304	0.416107	0.276551
1	0.811888	0.746129	0.830497	0.458804	0.53077	0.916996	0.621874	0.439853	0.300298
1	0.77744	0.761429	0.77744	0	0.643392	0.916996	0.339304	0.421891	0.272748
1	0.830497	0.731481	0.811888	0.427775	0.547163	0.916996	0.811888	0.515123	0.32142
1	0.77744	0.666346	0.472043	0	0.46536	0.916996	0.794233	0.522858	0.284286
1	0.77744	0.666346	0.472043	0	0.472043	0.916996	0.794233	0.53077	0.28822
1	0.830497	0.746129	0.811888	0.410418	0.555662	0.916996	0.621874	0.46536	0.330246
1	0.830497	0.731481	0.811888	0.427775	0.547163	0.916996	0.811888	0.522858	0.32142
1	0.830497	0.77744	0.811888	0.427775	0.53077	0.916996	0.601621	0.439853	0.353354
1	0.830497	0.731481	0.811888	0.433761	0.547163	0.916996	0.811888	0.515123	0.317091
1	0.811888	0.761429	0.761429	0.433761	0.485813	0.942502	0.632465	0.632465	0.325805
1	0.830497	0.77744	0.811888	0.421891	0.53077	0.916996	0.601621	0.439853	0.348607
1	0.811888	0.746129	0.811888	0.458804	0.53077	0.916996	0.621874	0.446055	0.300298
1	0.830497	0.731481	0.811888	0.427775	0.547163	0.916996	0.811888	0.515123	0.32142
1	0.830497	0.746129	0.811888	0.410418	0.555662	0.916996	0.621874	0.46536	0.325805
1	0.830497	0.746129	0.811888	0.410418	0.555662	0.916996	0.621874	0.472043	0.32142
1	0.77744	0.666346	0.472043	0	0.472043	0.916996	0.794233	0.53077	0.28822
1	0.830497	0.731481	0.811888	0.433761	0.547163	0.916996	0.811888	0.515123	0.32142
1	0.761429	0.746129	0.794233	0	0.643392	0.916996	0.334745	0.416107	0.254338
1	0.77744	0.666346	0.472043	0	0.46536	0.916996	0.794233	0.522858	0.28822
1	0.830497	0.761429	0.811888	0.427775	0.53077	0.916996	0.601621	0.439853	0.348607
1	0.794233	0.761429	0.761429	0.439853	0.478859	0.942502	0.632465	0.632465	0.325805
1	0.830497	0.731481	0.811888	0.427775	0.547163	0.916996	0.811888	0.515123	0.32142
1	0.77744	0.666346	0.478859	0	0.46536	0.916996	0.794233	0.53077	0.284286
1	0.830497	0.746129	0.811888	0.410418	0.555662	0.916996	0.621874	0.46536	0.325805
1	0.811888	0.746129	0.830497	0.458804	0.53077	0.916996	0.621874	0.446055	0.30442
1	0.830497	0.746129	0.811888	0.410418	0.555662	0.916996	0.621874	0.46536	0.325805
1	0.811888	0.746129	0.811888	0.458804	0.53077	0.916996	0.621874	0.446055	0.300298
1	0.830497	0.746129	0.811888	0.410418	0.555662	0.916996	0.621874	0.472043	0.32142
1	0.830497	0.731481	0.811888	0.433761	0.547163	0.916996	0.811888	0.515123	0.32142
1	0.746129	0.746129	0.77744	0	0.654678	0.942502	0.339304	0.421891	0.247241
1	0.794233	0.77744	0.77744	0	0.643392	0.942502	0.343924	0.421891	0.268987
1	0.830497	0.761429	0.811888	0.421891	0.538869	0.916996	0.611599	0.446055	0.339304
1	0.794233	0.761429	0.761429	0.439853	0.478859	0.942502	0.632465	0.632465	0.325805
1	0.830497	0.731481	0.811888	0.433761	0.547163	0.916996	0.811888	0.515123	0.317091
1	0.746129	0.746129	0.794233	0	0.654678	0.916996	0.330246	0.427775	0.254338
1	0.811888	0.746129	0.830497	0.458804	0.53077	0.916996	0.621874	0.446055	0.30442
1	0.77744	0.666346	0.478859	0	0.472043	0.916996	0.794233	0.53077	0.28822
1	0.77744	0.761429	0.77744	0	0.643392	0.942502	0.334745	0.416107	0.268987
1	0.811888	0.746129	0.830497	0.439853	0.53077	0.916996	0.621874	0.45237	0.317091
1	0.830497	0.731481	0.811888	0.427775	0.547163	0.916996	0.811888	0.515123	0.325805
1	0.830497	0.746129	0.811888	0.404821	0.555662	0.916996	0.621874	0.472043	0.317091
1	0.830497	0.746129	0.811888	0.410418	0.555662	0.916996	0.621874	0.472043	0.32142
1	0.77744	0.666346	0.472043	0	0.46536	0.916996	0.794233	0.522858	0.28822
1	0.830497	0.746129	0.811888	0.410418	0.555662	0.916996	0.621874	0.472043	0.32142
1	0.830497	0.746129	0.811888	0.410418	0.555662	0.916996	0.621874	0.472043	0.32142
1	0.830497	0.746129	0.811888	0.404821	0.555662	0.916996	0.621874	0.46536	0.32142
1	0.830497	0.77744	0.811888	0.427775	0.53077	0.916996	0.601621	0.439853	0.353354
1	0.830497	0.731481	0.811888	0.433761	0.547163	0.916996	0.811888	0.515123	0.32142
1	0.830497	0.746129	0.811888	0.410418	0.555662	0.916996	0.621874	0.472043	0.317091
1	0.811888	0.746129	0.811888	0.458804	0.53077	0.916996	0.621874	0.446055	0.300298
1	0.830497	0.746129	0.811888	0.410418	0.555662	0.916996	0.621874	0.46536	0.330246
1	0.830497	0.761429	0.811888	0.427775	0.53077	0.916996	0.601621	0.439853	0.348607
1	0.830497	0.761429	0.811888	0.410418	0.53077	0.916996	0.601621	0.433761	0.343924
1	0.811888	0.746129	0.830497	0.439853	0.53077	0.916996	0.611599	0.45237	0.317091
1	0.811888	0.746129	0.830497	0.458804	0.53077	0.916996	0.621874	0.446055	0.30442
1	0.811888	0.761429	0.811888	0.427775	0.538869	0.916996	0.611599	0.439853	0.334745
1	0.77744	0.666346	0.478859	0	0.46536	0.916996	0.794233	0.53077	0.28822
1	0.830497	0.746129	0.811888	0.404821	0.555662	0.916996	0.621874	0.46536	0.32142
1	0.811888	0.746129	0.830497	0.439853	0.53077	0.916996	0.611599	0.45237	0.317091
1	0.830497	0.746129	0.811888	0.410418	0.555662	0.916996	0.621874	0.46536	0.330246
1	0.77744	0.77744	0.77744	0	0.643392	0.942502	0.334745	0.416107	0.268987
1	0.830497	0.761429	0.811888	0.427775	0.538869	0.916996	0.611599	0.446055	0.339304
1	0.811888	0.761429	0.811888	0.421891	0.538869	0.916996	0.611599	0.439853	0.353354
1	0.811888	0.761429	0.811888	0.427775	0.538869	0.916996	0.611599	0.439853	0.339304
1	0.830497	0.731481	0.811888	0.427775	0.547163	0.916996	0.811888	0.515123	0.325805
1	0.830497	0.746129	0.811888	0.410418	0.555662	0.916996	0.621874	0.46536	0.330246
1	0.830497	0.761429	0.811888	0.416107	0.538869	0.916996	0.611599	0.439853	0.348607
1	0.830497	0.761429	0.811888	0.416107	0.538869	0.916996	0.611599	0.433761	0.353354
1	0.830497	0.746129	0.811888	0.410418	0.555662	0.916996	0.621874	0.472043	0.32142
1	0.830497	0.746129	0.811888	0.410418	0.555662	0.916996	0.621874	0.472043	0.317091
1	0.77744	0.666346	0.478859	0	0.472043	0.916996	0.794233	0.53077	0.284286
1	0.746129	0.746129	0.794233	0	0.654678	0.916996	0.334745	0.416107	0.250771
1	0.811888	0.746129	0.830497	0.439853	0.53077	0.916996	0.621874	0.45237	0.317091
1	0.830497	0.746129	0.811888	0.404821	0.555662	0.916996	0.621874	0.472043	0.317091
1	0.811888	0.746129	0.830497	0.45237	0.53077	0.916996	0.621874	0.446055	0.308592
1	0.746129	0.746129	0.77744	0	0.654678	0.916996	0.334745	0.416107	0.254338
1	0.830497	0.761429	0.811888	0.410418	0.53077	0.916996	0.601621	0.433761	0.343924
1	0.830497	0.731481	0.811888	0.427775	0.547163	0.916996	0.811888	0.515123	0.32142
1	0.811888	0.761429	0.811888	0.421891	0.538869	0.916996	0.611599	0.433761	0.353354
1	0.830497	0.746129	0.811888	0.410418	0.555662	0.916996	0.621874	0.46536	0.325805
1	0.830497	0.731481	0.811888	0.427775	0.547163	0.916996	0.811888	0.515123	0.317091
1	0.811888	0.746129	0.830497	0.458804	0.53077	0.916996	0.621874	0.446055	0.30442
1	0.830497	0.746129	0.811888	0.410418	0.555662	0.916996	0.621874	0.46536	0.325805
1	0.77744	0.666346	0.478859	0	0.472043	0.916996	0.794233	0.53077	0.284286
1	0.811888	0.761429	0.761429	0.433761	0.485813	0.942502	0.632465	0.632465	0.325805
1	0.811888	0.746129	0.811888	0.458804	0.53077	0.916996	0.621874	0.446055	0.300298
1	0.77744	0.666346	0.478859	0	0.472043	0.916996	0.794233	0.53077	0.284286
1	0.830497	0.746129	0.811888	0.410418	0.555662	0.916996	0.621874	0.472043	0.32142
1	0.77744	0.666346	0.478859	0	0.46536	0.916996	0.794233	0.53077	0.284286
1	0.77744	0.666346	0.478859	0	0.458804	0.916996	0.794233	0.522858	0.280397
1	0.77744	0.666346	0.478859	0	0.46536	0.916996	0.794233	0.522858	0.284286
1	0.811888	0.746129	0.830497	0.458804	0.53077	0.916996	0.621874	0.446055	0.30442
1	0.794233	0.761429	0.77744	0.427775	0.478859	0.942502	0.632465	0.621874	0.325805
1	0.830497	0.731481	0.811888	0.427775	0.547163	0.916996	0.811888	0.515123	0.32142
1	0.830497	0.731481	0.811888	0.427775	0.547163	0.916996	0.811888	0.515123	0.32142
1	0.77744	0.666346	0.472043	0	0.46536	0.916996	0.794233	0.522858	0.284286
1	0.794233	0.77744	0.77744	0.427775	0.485813	0.916996	0.632465	0.621874	0.334745
1	0.794233	0.761429	0.761429	0.439853	0.478859	0.942502	0.632465	0.632465	0.325805
1	0.830497	0.746129	0.811888	0.410418	0.555662	0.916996	0.621874	0.46536	0.325805
1	0.77744	0.666346	0.478859	0	0.46536	0.916996	0.794233	0.522858	0.280397
1	0.811888	0.746129	0.830497	0.458804	0.53077	0.916996	0.621874	0.439853	0.300298
1	0.77744	0.666346	0.472043	0	0.472043	0.916996	0.794233	0.53077	0.28822
1	0.794233	0.77744	0.77744	0	0.643392	0.942502	0.339304	0.421891	0.265266
1	0.746129	0.746129	0.77744	0	0.654678	0.916996	0.339304	0.421891	0.250771
1	0.811888	0.746129	0.830497	0.439853	0.538869	0.916996	0.611599	0.458804	0.312815
1	0.811888	0.761429	0.811888	0.427775	0.538869	0.916996	0.611599	0.446055	0.348607
1	0.794233	0.761429	0.761429	0.433761	0.485813	0.942502	0.632465	0.621874	0.325805
1	0.811888	0.746129	0.811888	0.458804	0.53077	0.916996	0.621874	0.446055	0.300298
1	0.830497	0.746129	0.811888	0.410418	0.555662	0.916996	0.621874	0.46536	0.325805
1	0.811888	0.746129	0.811888	0.458804	0.53077	0.916996	0.621874	0.446055	0.300298
1	0.811888	0.746129	0.830497	0.439853	0.538869	0.916996	0.611599	0.458804	0.312815
1	0.811888	0.746129	0.830497	0.439853	0.53077	0.916996	0.621874	0.45237	0.317091
1	0.77744	0.666346	0.472043	0	0.472043	0.916996	0.794233	0.53077	0.28822
1	0.830497	0.746129	0.811888	0.410418	0.555662	0.916996	0.621874	0.472043	0.32142
1	0.830497	0.731481	0.811888	0.427775	0.547163	0.916996	0.811888	0.515123	0.32142
1	0.811888	0.746129	0.830497	0.446055	0.53077	0.916996	0.611599	0.446055	0.317091
1	0.794233	0.761429	0.761429	0.439853	0.478859	0.942502	0.632465	0.632465	0.325805
1	0.77744	0.666346	0.472043	0	0.46536	0.916996	0.794233	0.522858	0.284286
1	0.77744	0.77744	0.77744	0	0.643392	0.942502	0.334745	0.421891	0.272748
1	0.811888	0.746129	0.811888	0.458804	0.53077	0.916996	0.621874	0.446055	0.300298
1	0.77744	0.666346	0.472043	0	0.46536	0.916996	0.794233	0.522858	0.28822
1	0.830497	0.746129	0.811888	0.410418	0.555662	0.916996	0.621874	0.46536	0.330246
1	0.830497	0.731481	0.811888	0.427775	0.547163	0.916996	0.811888	0.507558	0.32142
1	0.811888	0.761429	0.761429	0.427775	0.485813	0.942502	0.632465	0.621874	0.32142
1	0.830497	0.731481	0.811888	0.427775	0.547163	0.916996	0.811888	0.515123	0.325805
1	0.830497	0.761429	0.811888	0.421891	0.53077	0.916996	0.601621	0.439853	0.353354
1	0.811888	0.746129	0.830497	0.458804	0.53077	0.916996	0.621874	0.446055	0.30442
1	0.811888	0.761429	0.761429	0.427775	0.485813	0.942502	0.632465	0.621874	0.32142
1	0.761429	0.746129	0.794233	0	0.643392	0.916996	0.343924	0.416107	0.250771
1	0.830497	0.731481	0.811888	0.427775	0.547163	0.916996	0.811888	0.522858	0.325805
1	0.811888	0.746129	0.830497	0.439853	0.538869	0.916996	0.611599	0.458804	0.312815
1	0.830497	0.77744	0.811888	0.421891	0.53077	0.916996	0.601621	0.439853	0.353354
1	0.794233	0.761429	0.761429	0.433761	0.485813	0.942502	0.632465	0.621874	0.325805
1	0.811888	0.761429	0.811888	0.427775	0.538869	0.916996	0.611599	0.446055	0.348607
1	0.77744	0.666346	0.472043	0	0.46536	0.916996	0.794233	0.522858	0.28822
1	0.77744	0.77744	0.77744	0	0.643392	0.942502	0.339304	0.421891	0.272748
1	0.830497	0.761429	0.811888	0.421891	0.53077	0.916996	0.601621	0.433761	0.353354
1	0.794233	0.761429	0.761429	0.439853	0.478859	0.942502	0.632465	0.632465	0.330246
1	0.811888	0.746129	0.830497	0.45237	0.53077	0.916996	0.621874	0.446055	0.308592
1	0.830497	0.731481	0.811888	0.427775	0.547163	0.916996	0.811888	0.515123	0.32142
1	0.811888	0.746129	0.830497	0.439853	0.538869	0.916996	0.611599	0.458804	0.312815
1	0.77744	0.666346	0.472043	0	0.46536	0.916996	0.794233	0.522858	0.284286
1	0.811888	0.761429	0.811888	0.427775	0.538869	0.916996	0.611599	0.439853	0.334745
1	0.77744	0.666346	0.472043	0	0.472043	0.916996	0.794233	0.53077	0.28822
1	0.794233	0.761429	0.761429	0.439853	0.478859	0.942502	0.632465	0.632465	0.330246
1	0.830497	0.731481	0.811888	0.427775	0.547163	0.916996	0.811888	0.507558	0.32142
1	0.811888	0.761429	0.811888	0.427775	0.538869	0.916996	0.611599	0.446055	0.348607
1	0.794233	0.761429	0.761429	0.433761	0.485813	0.942502	0.632465	0.621874	0.325805
1	0.830497	0.761429	0.811888	0.421891	0.538869	0.916996	0.611599	0.446055	0.339304
1	0.794233	0.77744	0.77744	0.421891	0.472043	0.916996	0.632465	0.632465	0.334745
1	0.77744	0.666346	0.472043	0	0.46536	0.916996	0.794233	0.522858	0.28822
1	0.830497	0.731481	0.811888	0.433761	0.547163	0.916996	0.811888	0.515123	0.317091
1	0.811888	0.746129	0.830497	0.439853	0.53077	0.916996	0.611599	0.45237	0.317091
1	0.761429	0.761429	0.77744	0	0.643392	0.916996	0.343924	0.416107	0.265266
1	0.811888	0.746129	0.830497	0.439853	0.53077	0.916996	0.611599	0.45237	0.317091
1	0.830497	0.746129	0.811888	0.410418	0.555662	0.916996	0.621874	0.472043	0.32142
1	0.830497	0.761429	0.811888	0.421891	0.53077	0.916996	0.601621	0.439853	0.348607
1	0.77744	0.761429	0.77744	0	0.643392	0.942502	0.334745	0.421891	0.265266
1	0.830497	0.77744	0.811888	0.421891	0.53077	0.916996	0.601621	0.439853	0.353354
1	0.811888	0.746129	0.830497	0.439853	0.538869	0.916996	0.611599	0.458804	0.312815
1	0.830497	0.731481	0.811888	0.427775	0.547163	0.916996	0.811888	0.515123	0.325805
1	0.811888	0.761429	0.811888	0.427775	0.538869	0.916996	0.611599	0.446055	0.343924
1	0.77744	0.666346	0.472043	0	0.46536	0.916996	0.794233	0.522858	0.28822
1	0.830497	0.746129	0.811888	0.410418	0.555662	0.916996	0.621874	0.472043	0.32142
1	0.794233	0.77744	0.77744	0.421891	0.472043	0.916996	0.621874	0.632465	0.339304
1	0.811888	0.761429	0.811888	0.427775	0.538869	0.916996	0.611599	0.446055	0.334745
1	0.77744	0.761429	0.77744	0	0.643392	0.916996	0.339304	0.421891	0.268987
1	0.77744	0.666346	0.472043	0	0.472043	0.916996	0.794233	0.53077	0.28822
1	0.77744	0.666346	0.472043	0	0.46536	0.916996	0.794233	0.522858	0.28822
1	0.77744	0.666346	0.472043	0	0.46536	0.916996	0.794233	0.522858	0.28822
1	0.811888	0.746129	0.830497	0.45237	0.53077	0.916996	0.621874	0.446055	0.308592
1	0.830497	0.731481	0.811888	0.427775	0.547163	0.916996	0.811888	0.515123	0.317091
1	0.830497	0.746129	0.811888	0.410418	0.555662	0.916996	0.621874	0.46536	0.325805
1	0.830497	0.746129	0.811888	0.404821	0.555662	0.916996	0.621874	0.472043	0.317091
1	0.794233	0.77744	0.77744	0.427775	0.478859	0.916996	0.632465	0.632465	0.330246
1	0.811888	0.761429	0.811888	0.427775	0.538869	0.916996	0.611599	0.446055	0.343924
1	0.746129	0.746129	0.77744	0	0.654678	0.916996	0.339304	0.416107	0.254338
1	0.830497	0.761429	0.811888	0.416107	0.53077	0.916996	0.601621	0.439853	0.348607
1	0.746129	0.746129	0.794233	0	0.654678	0.942502	0.339304	0.421891	0.257942
1	0.746129	0.746129	0.77744	0	0.654678	0.916996	0.343924	0.421891	0.243747
1	0.794233	0.761429	0.77744	0.427775	0.472043	0.916996	0.632465	0.621874	0.334745
1	0.77744	0.666346	0.478859	0	0.472043	0.916996	0.794233	0.53077	0.284286
1	0.77744	0.666346	0.478859	0	0.472043	0.916996	0.794233	0.53077	0.28822
1	0.811888	0.761429	0.761429	0.427775	0.485813	0.942502	0.632465	0.621874	0.32142
1	0.794233	0.77744	0.77744	0.427775	0.485813	0.916996	0.632465	0.621874	0.339304
1	0.811888	0.761429	0.811888	0.427775	0.538869	0.916996	0.611599	0.446055	0.334745
1	0.811888	0.746129	0.830497	0.439853	0.53077	0.916996	0.611599	0.45237	0.317091
1	0.77744	0.666346	0.478859	0	0.46536	0.916996	0.794233	0.53077	0.284286
1	0.77744	0.77744	0.77744	0	0.643392	0.942502	0.334745	0.421891	0.265266
1	0.811888	0.761429	0.811888	0.421891	0.538869	0.916996	0.611599	0.439853	0.348607
1	0.77744	0.666346	0.478859	0	0.46536	0.916996	0.794233	0.53077	0.284286
1	0.746129	0.746129	0.77744	0	0.654678	0.942502	0.334745	0.421891	0.250771
1	0.761429	0.761429	0.77744	0	0.643392	0.942502	0.343924	0.421891	0.261584
1	0.811888	0.746129	0.830497	0.458804	0.53077	0.916996	0.621874	0.446055	0.30442
1	0.746129	0.731481	0.77744	0	0.666346	0.916996	0.343924	0.421891	0.254338
1	0.811888	0.761429	0.811888	0.427775	0.538869	0.916996	0.611599	0.446055	0.343924
1	0.77744	0.666346	0.472043	0	0.46536	0.916996	0.794233	0.522858	0.284286
1	0.77744	0.666346	0.472043	0	0.472043	0.916996	0.794233	0.53077	0.28822
1	0.811888	0.746129	0.830497	0.458804	0.53077	0.916996	0.621874	0.446055	0.30442
1	0.746129	0.746129	0.77744	0	0.654678	0.942502	0.343924	0.421891	0.243747
1	0.77744	0.77744	0.77744	0	0.643392	0.942502	0.334745	0.416107	0.261584
1	0.746129	0.731481	0.77744	0	0.666346	0.916996	0.343924	0.421891	0.254338
1	0.830497	0.746129	0.811888	0.410418	0.555662	0.916996	0.621874	0.472043	0.325805
1	0.811888	0.746129	0.811888	0.458804	0.53077	0.916996	0.621874	0.446055	0.300298
1	0.830497	0.731481	0.811888	0.427775	0.547163	0.916996	0.811888	0.515123	0.32142
1	0.77744	0.666346	0.478859	0	0.472043	0.916996	0.794233	0.53077	0.28822
1	0.77744	0.666346	0.478859	0	0.472043	0.916996	0.794233	0.53077	0.28822
1	0.77744	0.666346	0.472043	0	0.46536	0.916996	0.794233	0.522858	0.28822
1	0.830497	0.746129	0.811888	0.410418	0.555662	0.916996	0.621874	0.46536	0.325805
1	0.77744	0.761429	0.77744	0	0.643392	0.916996	0.339304	0.421891	0.268987
1	0.830497	0.731481	0.811888	0.427775	0.547163	0.916996	0.811888	0.515123	0.325805
1	0.77744	0.761429	0.77744	0	0.643392	0.916996	0.339304	0.416107	0.268987
1	0.794233	0.761429	0.77744	0.421891	0.472043	0.916996	0.632465	0.621874	0.334745
1	0.830497	0.746129	0.811888	0.410418	0.555662	0.916996	0.621874	0.46536	0.325805
1	0.830497	0.746129	0.811888	0.410418	0.555662	0.916996	0.621874	0.46536	0.325805
1	0.830497	0.746129	0.811888	0.404821	0.555662	0.916996	0.621874	0.46536	0.325805
1	0.830497	0.731481	0.811888	0.427775	0.547163	0.916996	0.811888	0.515123	0.32142
1	0.761429	0.746129	0.77744	0	0.643392	0.942502	0.343924	0.421891	0.268987
1	0.811888	0.746129	0.830497	0.458804	0.53077	0.916996	0.621874	0.446055	0.30442
1	0.830497	0.761429	0.811888	0.421891	0.538869	0.916996	0.611599	0.446055	0.339304
1	0.830497	0.746129	0.811888	0.404821	0.555662	0.916996	0.621874	0.472043	0.32142
1	0.830497	0.746129	0.811888	0.410418	0.555662	0.916996	0.621874	0.46536	0.325805
1	0.811888	0.761429	0.761429	0.433761	0.485813	0.942502	0.632465	0.621874	0.32142
1	0.811888	0.761429	0.761429	0.433761	0.485813	0.942502	0.632465	0.621874	0.325805
1	0.830497	0.746129	0.811888	0.410418	0.555662	0.916996	0.621874	0.46536	0.325805
1	0.811888	0.746129	0.830497	0.439853	0.53077	0.916996	0.611599	0.45237	0.317091
1	0.746129	0.746129	0.77744	0	0.654678	0.916996	0.334745	0.421891	0.254338
1	0.830497	0.746129	0.811888	0.410418	0.555662	0.916996	0.621874	0.472043	0.325805
1	0.830497	0.761429	0.811888	0.421891	0.53077	0.916996	0.601621	0.439853	0.343924
1	0.830497	0.731481	0.811888	0.427775	0.547163	0.916996	0.811888	0.515123	0.32142
1	0.811888	0.761429	0.811888	0.427775	0.538869	0.916996	0.611599	0.446055	0.348607
1	0.77744	0.666346	0.478859	0	0.46536	0.916996	0.794233	0.522858	0.284286
1	0.811888	0.761429	0.761429	0.433761	0.485813	0.942502	0.632465	0.621874	0.32142
1	0.830497	0.731481	0.811888	0.427775	0.547163	0.916996	0.811888	0.515123	0.32142
1	0.77744	0.666346	0.478859	0	0.458804	0.916996	0.794233	0.522858	0.280397
1	0.811888	0.746129	0.830497	0.439853	0.53077	0.916996	0.611599	0.45237	0.317091
1	0.811888	0.746129	0.830497	0.458804	0.53077	0.916996	0.621874	0.446055	0.30442
1	0.77744	0.666346	0.472043	0	0.46536	0.916996	0.794233	0.522858	0.28822
1	0.811888	0.761429	0.811888	0.427775	0.538869	0.916996	0.611599	0.446055	0.348607
1	0.746129	0.746129	0.77744	0	0.666346	0.916996	0.343924	0.421891	0.254338
1	0.811888	0.746129	0.830497	0.458804	0.53077	0.916996	0.621874	0.439853	0.300298
1	0.77744	0.666346	0.472043	0	0.46536	0.916996	0.794233	0.522858	0.284286
1	0.830497	0.731481	0.811888	0.427775	0.547163	0.916996	0.811888	0.515123	0.325805
1	0.830497	0.746129	0.811888	0.410418	0.555662	0.916996	0.621874	0.472043	0.32142
1	0.830497	0.731481	0.811888	0.427775	0.547163	0.916996	0.811888	0.515123	0.325805
1	0.794233	0.761429	0.761429	0.439853	0.478859	0.942502	0.632465	0.632465	0.325805
1	0.811888	0.761429	0.811888	0.421891	0.538869	0.916996	0.611599	0.446055	0.339304
1	0.794233	0.77744	0.77744	0.427775	0.478859	0.916996	0.632465	0.632465	0.334745
1	0.830497	0.746129	0.811888	0.410418	0.555662	0.916996	0.621874	0.472043	0.32142
1	0.794233	0.77744	0.77744	0	0.643392	0.916996	0.339304	0.416107	0.254338
1	0.830497	0.761429	0.811888	0.427775	0.53077	0.916996	0.601621	0.439853	0.348607
1	0.811888	0.746129	0.830497	0.439853	0.538869	0.916996	0.611599	0.458804	0.317091
1	0.794233	0.761429	0.761429	0.433761	0.485813	0.942502	0.632465	0.621874	0.325805
1	0.794233	0.77744	0.77744	0.427775	0.46536	0.916996	0.632465	0.621874	0.343924
1	0.77744	0.666346	0.478859	0	0.46536	0.916996	0.794233	0.53077	0.280397
1	0.794233	0.77744	0.77744	0.421891	0.46536	0.916996	0.632465	0.632465	0.334745
1	0.830497	0.746129	0.811888	0.410418	0.555662	0.916996	0.621874	0.46536	0.325805
1	0.794233	0.77744	0.77744	0.427775	0.485813	0.916996	0.632465	0.621874	0.334745
1	0.811888	0.746129	0.830497	0.458804	0.53077	0.916996	0.621874	0.446055	0.30442
1	0.811888	0.746129	0.830497	0.458804	0.53077	0.916996	0.621874	0.446055	0.30442
1	0.794233	0.77744	0.77744	0.421891	0.472043	0.942502	0.632465	0.632465	0.343924
1	0.830497	0.746129	0.811888	0.404821	0.555662	0.916996	0.621874	0.46536	0.325805
1	0.77744	0.666346	0.478859	0	0.46536	0.916996	0.794233	0.522858	0.280397
1	0.830497	0.731481	0.811888	0.433761	0.547163	0.916996	0.811888	0.515123	0.317091
1	0.811888	0.761429	0.761429	0.433761	0.485813	0.942502	0.632465	0.621874	0.325805
1	0.830497	0.746129	0.811888	0.410418	0.555662	0.916996	0.621874	0.472043	0.317091
1	0.830497	0.746129	0.811888	0.410418	0.555662	0.916996	0.621874	0.472043	0.317091
1	0.794233	0.761429	0.761429	0.439853	0.478859	0.942502	0.632465	0.632465	0.330246
1	0.746129	0.746129	0.77744	0	0.654678	0.942502	0.339304	0.421891	0.247241
1	0.746129	0.746129	0.77744	0	0.654678	0.916996	0.343924	0.421891	0.243747
1	0.811888	0.746129	0.830497	0.458804	0.53077	0.916996	0.621874	0.439853	0.30442
1	0.830497	0.77744	0.811888	0.433761	0.53077	0.916996	0.601621	0.439853	0.353354
1	0.830497	0.761429	0.811888	0.416107	0.538869	0.916996	0.611599	0.433761	0.353354
1	0.746129	0.746129	0.77744	0	0.654678	0.916996	0.334745	0.421891	0.250771
1	0.746129	0.746129	0.77744	0	0.654678	0.916996	0.339304	0.421891	0.261584
1	0.811888	0.761429	0.811888	0.427775	0.538869	0.916996	0.611599	0.446055	0.343924
1	0.830497	0.731481	0.811888	0.427775	0.547163	0.916996	0.811888	0.515123	0.32142
1	0.794233	0.77744	0.77744	0	0.643392	0.942502	0.334745	0.421891	0.268987
1	0.830497	0.731481	0.811888	0.427775	0.547163	0.916996	0.811888	0.515123	0.32142
1	0.77744	0.666346	0.472043	0	0.472043	0.916996	0.794233	0.53077	0.28822
1	0.811888	0.746129	0.830497	0.439853	0.538869	0.916996	0.611599	0.458804	0.317091
1	0.811888	0.746129	0.830497	0.439853	0.53077	0.916996	0.611599	0.45237	0.317091
1	0.77744	0.666346	0.478859	0	0.46536	0.916996	0.794233	0.53077	0.284286
1	0.830497	0.731481	0.811888	0.427775	0.547163	0.916996	0.811888	0.515123	0.317091
1	0.830497	0.746129	0.811888	0.410418	0.555662	0.916996	0.621874	0.46536	0.325805
1	0.794233	0.761429	0.761429	0.433761	0.485813	0.942502	0.632465	0.632465	0.325805
1	0.77744	0.666346	0.478859	0	0.46536	0.916996	0.794233	0.53077	0.284286
1	0.811888	0.761429	0.811888	0.427775	0.538869	0.916996	0.611599	0.446055	0.348607
1	0.830497	0.761429	0.811888	0.421891	0.538869	0.916996	0.611599	0.439853	0.348607
1	0.761429	0.746129	0.794233	0	0.643392	0.916996	0.334745	0.416107	0.257942
1	0.811888	0.761429	0.811888	0.427775	0.538869	0.916996	0.611599	0.446055	0.343924
1	0.794233	0.761429	0.761429	0.439853	0.478859	0.942502	0.632465	0.632465	0.325805
1	0.746129	0.731481	0.77744	0	0.654678	0.916996	0.343924	0.421891	0.257942
1	0.77744	0.77744	0.77744	0	0.643392	0.942502	0.339304	0.421891	0.276551
1	0.794233	0.77744	0.77744	0.421891	0.472043	0.942502	0.632465	0.632465	0.343924
1	0.811888	0.746129	0.830497	0.439853	0.53077	0.916996	0.621874	0.45237	0.317091
1	0.794233	0.761429	0.761429	0.433761	0.478859	0.942502	0.632465	0.632465	0.325805
1	0.830497	0.731481	0.811888	0.427775	0.547163	0.916996	0.811888	0.515123	0.325805
1	0.761429	0.761429	0.77744	0	0.643392	0.942502	0.343924	0.421891	0.261584
1	0.77744	0.666346	0.472043	0	0.46536	0.916996	0.794233	0.53077	0.28822
1	0.811888	0.761429	0.811888	0.427775	0.538869	0.916996	0.611599	0.446055	0.334745
1	0.811888	0.746129	0.811888	0.458804	0.53077	0.916996	0.621874	0.446055	0.300298
1	0.830497	0.77744	0.811888	0.421891	0.522858	0.916996	0.601621	0.439853	0.348607
1	0.830497	0.731481	0.811888	0.427775	0.547163	0.916996	0.811888	0.507558	0.32142
1	0.830497	0.746129	0.811888	0.410418	0.555662	0.916996	0.621874	0.46536	0.325805
1	0.794233	0.761429	0.761429	0.433761	0.478859	0.942502	0.632465	0.632465	0.325805
1	0.811888	0.746129	0.811888	0.458804	0.53077	0.916996	0.621874	0.446055	0.300298
1	0.830497	0.746129	0.811888	0.410418	0.555662	0.916996	0.621874	0.46536	0.325805
1	0.77744	0.666346	0.478859	0	0.458804	0.916996	0.794233	0.522858	0.276551
1	0.830497	0.746129	0.811888	0.410418	0.555662	0.916996	0.621874	0.472043	0.32142
1	0.794233	0.761429	0.761429	0.433761	0.478859	0.942502	0.632465	0.632465	0.325805
1	0.830497	0.761429	0.811888	0.421891	0.538869	0.916996	0.611599	0.446055	0.339304
1	0.794233	0.77744	0.77744	0.427775	0.472043	0.942502	0.632465	0.632465	0.343924
1	0.794233	0.761429	0.761429	0.439853	0.485813	0.942502	0.632465	0.632465	0.325805
1	0.77744	0.666346	0.478859	0	0.472043	0.916996	0.794233	0.53077	0.284286
1	0.830497	0.731481	0.811888	0.427775	0.547163	0.916996	0.811888	0.515123	0.325805
1	0.811888	0.761429	0.761429	0.427775	0.485813	0.916996	0.632465	0.621874	0.32142
1	0.794233	0.761429	0.761429	0.433761	0.485813	0.942502	0.632465	0.621874	0.325805
1	0.77744	0.666346	0.478859	0	0.458804	0.916996	0.794233	0.522858	0.280397
1	0.811888	0.761429	0.761429	0.427775	0.485813	0.916996	0.632465	0.621874	0.32142
1	0.811888	0.746129	0.830497	0.439853	0.53077	0.916996	0.621874	0.45237	0.312815
1	0.811888	0.761429	0.761429	0.427775	0.485813	0.916996	0.632465	0.621874	0.32142
1	0.811888	0.761429	0.811888	0.427775	0.538869	0.916996	0.611599	0.446055	0.348607
1	0.811888	0.746129	0.811888	0.458804	0.53077	0.916996	0.621874	0.446055	0.300298
1	0.830497	0.746129	0.811888	0.410418	0.555662	0.916996	0.621874	0.46536	0.330246
1	0.746129	0.746129	0.77744	0	0.654678	0.942502	0.339304	0.421891	0.250771
1	0.811888	0.746129	0.830497	0.446055	0.53077	0.916996	0.611599	0.45237	0.317091
1	0.830497	0.746129	0.811888	0.410418	0.555662	0.916996	0.621874	0.472043	0.325805
1	0.830497	0.731481	0.811888	0.427775	0.547163	0.916996	0.811888	0.515123	0.325805
1	0.794233	0.77744	0.77744	0.421891	0.46536	0.916996	0.632465	0.632465	0.334745
1	0.830497	0.746129	0.811888	0.410418	0.555662	0.916996	0.621874	0.472043	0.32142
1	0.746129	0.746129	0.77744	0	0.654678	0.916996	0.343924	0.421891	0.243747
1	0.830497	0.746129	0.794233	0.404821	0.555662	0.916996	0.621874	0.478859	0.317091
1	0.77744	0.666346	0.478859	0	0.472043	0.916996	0.794233	0.53077	0.28822
1	0.811888	0.746129	0.830497	0.45237	0.53077	0.916996	0.621874	0.446055	0.30442
1	0.811888	0.746129	0.830497	0.439853	0.538869	0.916996	0.611599	0.45237	0.312815
1	0.830497	0.746129	0.811888	0.410418	0.555662	0.916996	0.621874	0.472043	0.317091
1	0.830497	0.731481	0.811888	0.427775	0.555662	0.916996	0.811888	0.522858	0.32142
1	0.830497	0.746129	0.811888	0.410418	0.555662	0.916996	0.621874	0.46536	0.325805
1	0.77744	0.666346	0.472043	0	0.46536	0.916996	0.794233	0.522858	0.28822
1	0.794233	0.761429	0.77744	0.433761	0.478859	0.942502	0.643392	0.621874	0.343924
1	0.830497	0.746129	0.811888	0.410418	0.555662	0.916996	0.621874	0.46536	0.325805
1	0.830497	0.746129	0.811888	0.410418	0.555662	0.916996	0.621874	0.472043	0.325805
1	0.794233	0.77744	0.77744	0.427775	0.46536	0.916996	0.632465	0.621874	0.334745
1	0.77744	0.666346	0.472043	0	0.46536	0.916996	0.794233	0.522858	0.284286
1	0.746129	0.731481	0.77744	0	0.654678	0.916996	0.343924	0.421891	0.257942
1	0.811888	0.746129	0.811888	0.458804	0.53077	0.916996	0.621874	0.446055	0.300298
1	0.811888	0.761429	0.811888	0.421891	0.538869	0.916996	0.611599	0.433761	0.353354
1	0.830497	0.731481	0.811888	0.433761	0.547163	0.916996	0.811888	0.515123	0.317091
1	0.794233	0.761429	0.77744	0.421891	0.472043	0.916996	0.632465	0.621874	0.334745
1	0.830497	0.731481	0.811888	0.427775	0.547163	0.916996	0.811888	0.522858	0.32142
1	0.77744	0.666346	0.478859	0	0.472043	0.916996	0.794233	0.53077	0.284286
1	0.746129	0.731481	0.77744	0	0.654678	0.916996	0.343924	0.421891	0.257942
1	0.77744	0.666346	0.472043	0	0.46536	0.916996	0.794233	0.53077	0.28822
1	0.830497	0.731481	0.811888	0.433761	0.547163	0.916996	0.811888	0.522858	0.32142
1	0.811888	0.746129	0.830497	0.45237	0.53077	0.916996	0.621874	0.446055	0.308592
1	0.794233	0.761429	0.761429	0.433761	0.485813	0.942502	0.632465	0.632465	0.325805
1	0.77744	0.666346	0.478859	0	0.472043	0.916996	0.794233	0.53077	0.28822
1	0.811888	0.761429	0.811888	0.427775	0.538869	0.916996	0.611599	0.446055	0.339304
1	0.811888	0.761429	0.811888	0.427775	0.538869	0.916996	0.611599	0.446055	0.348607
1	0.830497	0.731481	0.811888	0.427775	0.547163	0.916996	0.811888	0.522858	0.325805
1	0.794233	0.761429	0.761429	0.433761	0.485813	0.942502	0.632465	0.632465	0.325805
1	0.811888	0.746129	0.830497	0.439853	0.538869	0.916996	0.611599	0.458804	0.317091
1	0.794233	0.77744	0.77744	0.427775	0.478859	0.916996	0.632465	0.632465	0.339304
1	0.746129	0.731481	0.77744	0	0.666346	0.916996	0.343924	0.421891	0.261584
1	0.746129	0.746129	0.77744	0	0.654678	0.916996	0.343924	0.416107	0.250771
1	0.794233	0.761429	0.761429	0.439853	0.478859	0.942502	0.632465	0.632465	0.330246
1	0.77744	0.666346	0.478859	0	0.472043	0.916996	0.794233	0.53077	0.284286
1	0.830497	0.746129	0.811888	0.410418	0.555662	0.916996	0.621874	0.472043	0.32142
1	0.830497	0.731481	0.811888	0.427775	0.547163	0.916996	0.811888	0.515123	0.325805
1	0.794233	0.77744	0.77744	0.427775	0.46536	0.916996	0.632465	0.621874	0.339304
1	0.794233	0.77744	0.77744	0.421891	0.458804	0.916996	0.632465	0.632465	0.334745
1	0.794233	0.761429	0.761429	0.433761	0.485813	0.942502	0.632465	0.621874	0.325805
1	0.830497	0.746129	0.811888	0.410418	0.555662	0.916996	0.621874	0.46536	0.325805
1	0.830497	0.761429	0.811888	0.421891	0.53077	0.916996	0.601621	0.433761	0.343924
1	0.830497	0.761429	0.811888	0.427775	0.53077	0.916996	0.601621	0.439853	0.348607
1	0.830497	0.731481	0.811888	0.433761	0.547163	0.916996	0.811888	0.515123	0.317091
1	0.811888	0.746129	0.811888	0.458804	0.53077	0.916996	0.621874	0.446055	0.300298
1	0.830497	0.761429	0.811888	0.427775	0.53077	0.916996	0.601621	0.439853	0.348607
1	0.77744	0.666346	0.472043	0	0.46536	0.916996	0.794233	0.522858	0.28822
1	0.77744	0.77744	0.77744	0	0.643392	0.942502	0.339304	0.416107	0.257942
1	0.77744	0.666346	0.472043	0	0.46536	0.916996	0.794233	0.522858	0.284286
1	0.811888	0.761429	0.811888	0.421891	0.538869	0.916996	0.611599	0.439853	0.353354
1	0.830497	0.746129	0.811888	0.410418	0.555662	0.916996	0.621874	0.46536	0.325805
1	0.794233	0.77744	0.77744	0	0.643392	0.942502	0.339304	0.421891	0.265266
1	0.830497	0.746129	0.794233	0.404821	0.555662	0.916996	0.621874	0.472043	0.317091
1	0.77744	0.666346	0.472043	0	0.472043	0.916996	0.794233	0.53077	0.28822
1	0.794233	0.761429	0.761429	0.439853	0.478859	0.916996	0.632465	0.632465	0.330246
1	0.761429	0.746129	0.794233	0	0.643392	0.916996	0.334745	0.421891	0.254338
1	0.830497	0.731481	0.811888	0.427775	0.547163	0.916996	0.811888	0.515123	0.317091
1	0.794233	0.77744	0.77744	0.427775	0.46536	0.916996	0.632465	0.632465	0.334745
1	0.830497	0.731481	0.811888	0.427775	0.547163	0.916996	0.811888	0.515123	0.32142
1	0.830497	0.746129	0.811888	0.410418	0.555662	0.916996	0.621874	0.46536	0.325805
1	0.77744	0.666346	0.472043	0	0.46536	0.916996	0.794233	0.53077	0.284286
1	0.77744	0.666346	0.472043	0	0.46536	0.916996	0.794233	0.522858	0.284286
1	0.794233	0.761429	0.761429	0.439853	0.478859	0.942502	0.632465	0.632465	0.330246
1	0.794233	0.77744	0.77744	0	0.643392	0.942502	0.343924	0.421891	0.265266
1	0.830497	0.761429	0.811888	0.416107	0.53077	0.916996	0.601621	0.427775	0.343924
1	0.811888	0.746129	0.830497	0.458804	0.53077	0.916996	0.621874	0.439853	0.30442
1	0.811888	0.746129	0.830497	0.439853	0.538869	0.916996	0.611599	0.458804	0.317091
1	0.794233	0.761429	0.77744	0.433761	0.478859	0.942502	0.643392	0.621874	0.339304
1	0.794233	0.761429	0.77744	0.433761	0.478859	0.942502	0.643392	0.621874	0.339304
1	0.830497	0.746129	0.811888	0.410418	0.555662	0.916996	0.621874	0.472043	0.317091
1	0.746129	0.746129	0.77744	0	0.666346	0.916996	0.334745	0.416107	0.247241
1	0.830497	0.746129	0.811888	0.410418	0.555662	0.916996	0.621874	0.472043	0.317091
1	0.811888	0.761429	0.811888	0.421891	0.538869	0.916996	0.611599	0.439853	0.348607
1	0.761429	0.746129	0.77744	0	0.654678	0.942502	0.343924	0.421891	0.265266
1	0.794233	0.761429	0.761429	0.433761	0.485813	0.942502	0.632465	0.621874	0.325805
1	0.830497	0.731481	0.811888	0.433761	0.547163	0.916996	0.811888	0.515123	0.317091
1	0.830497	0.77744	0.811888	0.421891	0.53077	0.916996	0.601621	0.439853	0.353354
1	0.794233	0.761429	0.761429	0.433761	0.485813	0.942502	0.632465	0.621874	0.325805
1	0.746129	0.746129	0.77744	0	0.666346	0.916996	0.339304	0.421891	0.254338
1	0.811888	0.746129	0.811888	0.458804	0.53077	0.916996	0.621874	0.446055	0.300298
1	0.77744	0.666346	0.478859	0	0.46536	0.916996	0.794233	0.53077	0.284286
1	0.794233	0.77744	0.77744	0.427775	0.46536	0.916996	0.632465	0.632465	0.334745
1	0.794233	0.761429	0.77744	0.427775	0.478859	0.942502	0.632465	0.621874	0.325805
1	0.811888	0.746129	0.830497	0.439853	0.538869	0.916996	0.611599	0.458804	0.312815
1	0.830497	0.746129	0.811888	0.410418	0.555662	0.916996	0.621874	0.46536	0.330246
1	0.77744	0.666346	0.472043	0	0.458804	0.916996	0.794233	0.522858	0.280397
1	0.830497	0.746129	0.811888	0.410418	0.555662	0.916996	0.621874	0.472043	0.32142
1	0.794233	0.761429	0.761429	0.439853	0.478859	0.942502	0.632465	0.632465	0.330246
1	0.830497	0.761429	0.811888	0.416107	0.53077	0.916996	0.601621	0.433761	0.343924
1	0.77744	0.666346	0.478859	0	0.472043	0.916996	0.794233	0.53077	0.28822
1	0.830497	0.746129	0.811888	0.410418	0.555662	0.916996	0.621874	0.46536	0.325805
1	0.811888	0.761429	0.811888	0.427775	0.538869	0.916996	0.611599	0.439853	0.334745
1	0.77744	0.666346	0.478859	0	0.46536	0.916996	0.794233	0.53077	0.284286
1	0.830497	0.746129	0.811888	0.410418	0.555662	0.916996	0.621874	0.46536	0.330246
1	0.811888	0.761429	0.811888	0.427775	0.538869	0.916996	0.611599	0.439853	0.334745
1	0.830497	0.731481	0.811888	0.427775	0.547163	0.916996	0.811888	0.515123	0.317091
1	0.794233	0.761429	0.77744	0.421891	0.46536	0.916996	0.632465	0.632465	0.334745
1	0.794233	0.761429	0.761429	0.439853	0.478859	0.942502	0.632465	0.632465	0.325805
1	0.811888	0.746129	0.830497	0.439853	0.538869	0.916996	0.611599	0.458804	0.317091
1	0.77744	0.666346	0.472043	0	0.46536	0.916996	0.794233	0.522858	0.284286
1	0.77744	0.666346	0.478859	0	0.46536	0.916996	0.794233	0.53077	0.284286
1	0.77744	0.761429	0.77744	0	0.643392	0.916996	0.339304	0.421891	0.268987
1	0.811888	0.746129	0.830497	0.439853	0.53077	0.916996	0.611599	0.45237	0.312815
1	0.830497	0.746129	0.811888	0.410418	0.555662	0.916996	0.621874	0.472043	0.32142
1	0.811888	0.746129	0.830497	0.439853	0.538869	0.916996	0.611599	0.458804	0.312815
1	0.77744	0.77744	0.77744	0	0.643392	0.942502	0.343924	0.416107	0.265266
1	0.830497	0.731481	0.811888	0.427775	0.547163	0.916996	0.811888	0.515123	0.317091
1	0.77744	0.666346	0.472043	0	0.46536	0.916996	0.794233	0.522858	0.284286
1	0.830497	0.746129	0.811888	0.410418	0.555662	0.916996	0.621874	0.472043	0.32142
1	0.77744	0.666346	0.478859	0	0.46536	0.916996	0.794233	0.53077	0.284286
1	0.830497	0.746129	0.811888	0.404821	0.555662	0.916996	0.621874	0.46536	0.32142
1	0.830497	0.746129	0.811888	0.410418	0.555662	0.916996	0.621874	0.46536	0.325805
1	0.811888	0.761429	0.761429	0.427775	0.485813	0.916996	0.632465	0.621874	0.325805
1	0.811888	0.746129	0.830497	0.439853	0.53077	0.916996	0.611599	0.45237	0.317091
1	0.811888	0.746129	0.830497	0.45237	0.53077	0.916996	0.621874	0.446055	0.30442
1	0.77744	0.761429	0.77744	0	0.643392	0.942502	0.334745	0.410418	0.268987
1	0.794233	0.761429	0.761429	0.433761	0.485813	0.942502	0.632465	0.632465	0.325805
[truncated: 1 more rows]
