# Supplementary material for: Virtual brain twins for stimulation in epilepsy
Source: Research Square preprint supplement (doi:10.21203/rs.3.rs-4908955/v1), 2024-09-03
Supplement: Supplementary file 9 [file Patient2_SEEG_stimulation.xlsx]

## Sheet: Sheet1
Left-F1-lateral-prefrontal	Left-F1-mesial-prefrontal	Left-Middle-frontal-sulcus	Left-F1-lateral-premotor	Left-Orbito-frontal-cortex	Left-PreSMA	Left-SMA	Left-Temporal-pole
1	0.385198	0.791647	0	0	0	0	0
1	0.788057	0	0	0	0	0	0
1	0.924174	0.761197	0	0	0	0.119258	0
1	0.417998	0.813667	0	0	0	0	0
1	0.947742	0.746875	0	0	0	0.102041	0.240624
1	0.924174	0.761197	0	0	0	0	0
1	0.902035	0.776105	0	0	0	0.116748	0
1	0.788057	0	0	0	0	0	0
1	0.947742	0.776105	0	0	0	0	0
1	0.369874	0.791647	0	0	0	0	0
1	0.947742	0.746875	0	0	0	0.102041	0.240624
1	0.947742	0.776105	0	0	0	0	0
1	0.947742	0.746875	0	0	0	0.102041	0.233668
1	0.788057	0	0	0	0	0	0
1	0.803169	0	0	0	0	0	0
1	0.924174	0.761197	0	0	0	0.119258	0
1	0.947742	0.776105	0	0	0	0	0
1	0.369874	0.791647	0	0	0	0	0
1	0.902035	0.776105	0	0	0	0.12433	0
1	0.924174	0.761197	0	0	0	0.116748	0
1	0.417998	0.813667	0	0	0	0	0
1	0.364905	0.791647	0	0	0	0	0
1	0.947742	0.776105	0	0	0	0	0
1	0.360003	0.791647	0	0	0	0	0
1	0.947742	0.776105	0	0	0	0	0
1	0.902035	0.776105	0	0	0	0.121785	0
1	0.924174	0.791647	0	0	0	0	0
1	0.385198	0.791647	0	0	0	0	0
1	0.924174	0.791647	0	0	0	0	0
1	0.902035	0.776105	0	0	0	0.119258	0
1	0.924174	0.776105	0	0	0	0.121785	0
1	0.902035	0.776105	0	0	0	0.121785	0
1	0.947742	0.776105	0	0	0	0	0
1	0.788057	0	0	0	0	0	0
1	0.947742	0.776105	0	0	0	0	0
1	0.924174	0.761197	0	0	0	0.116748	0
1	0.947742	0.776105	0	0	0	0	0
1	0.417998	0.813667	0	0	0	0	0
1	0.803169	0	0	0	0	0	0
1	0.947742	0.776105	0	0	0	0	0
1	0.380018	0.791647	0	0	0	0	0
1	0.417998	0.813667	0	0	0	0	0
1	0.803169	0	0	0	0	0	0
1	0.364905	0.791647	0	0	0	0	0
1	0.947742	0.761197	0	0	0	0	0
1	0.369874	0.791647	0	0	0	0	0
1	0.788057	0	0	0	0	0	0
1	0.374911	0.791647	0	0	0	0	0
1	0.947742	0.776105	0	0	0	0	0
1	0.803169	0	0	0	0	0	0
1	0.947742	0.776105	0	0	0	0	0
1	0.788057	0	0	0	0	0	0
1	0.924174	0.761197	0	0	0	0.114256	0
1	0.947742	0.746875	0	0	0	0	0.233668
1	0.974104	0.753484	0	0	0	0.104879	0.247317
1	0.947742	0.776105	0	0	0	0	0
1	0.974104	0.76765	0	0	0	0	0.247317
1	0.947742	0.761197	0	0	0	0	0
1	0.364905	0.791647	0	0	0	0	0
1	0.924174	0.776105	0	0	0	0	0
1	0.947742	0.776105	0	0	0	0	0
1	0.924174	0.761197	0	0	0	0.116748	0
1	0.369874	0.791647	0	0	0	0	0
1	0.924174	0.776105	0	0	0	0	0
1	0.417998	0.813667	0	0	0	0	0
1	0.788057	0	0	0	0	0	0
1	0.902035	0.776105	0	0	0	0.12433	0
1	0.924174	0.761197	0	0	0	0.114256	0
1	0.374911	0.791647	0	0	0	0	0
1	0.788057	0	0	0	0	0	0
1	0.924174	0.761197	0	0	0	0.119258	0
1	0.924174	0.776105	0	0	0	0	0
1	0.374911	0.791647	0	0	0	0	0
1	0.974104	0.753484	0	0	0	0	0.247317
1	0.947742	0.776105	0	0	0	0	0
1	0.924174	0.776105	0	0	0	0	0
1	0.788057	0	0	0	0	0	0
1	0.803169	0	0	0	0	0	0
1	0.417998	0.813667	0	0	0	0	0
1	0.924174	0.776105	0	0	0	0	0
1	0.924174	0.761197	0	0	0	0.116748	0
1	0.924174	0.776105	0	0	0	0.12433	0
1	0.974104	0.753484	0	0	0	0	0.247317
1	0.902035	0.776105	0	0	0	0.12433	0
1	0.423729	0.813667	0	0	0	0	0
1	0.924174	0.761197	0	0	0	0	0
1	0.364905	0.791647	0	0	0	0	0
1	0.947742	0.776105	0	0	0	0	0
1	0.924174	0.791647	0	0	0	0	0
1	0.788057	0	0	0	0	0	0
1	0.417998	0.813667	0	0	0	0	0
1	0.369874	0.791647	0	0	0	0	0
1	0.412354	0.813667	0	0	0	0	0
1	0.947742	0.761197	0	0	0	0	0
1	0.947742	0.746875	0	0	0	0.104451	0.237129
1	0.924174	0.776105	0	0	0	0	0
1	0.788057	0	0	0	0	0	0
1	0.947742	0.761197	0	0	0	0	0
1	0.417998	0.813667	0	0	0	0	0
1	0.974104	0.753484	0	0	0	0	0.247317
1	0.374911	0.791647	0	0	0	0	0
1	0.355166	0.791647	0	0	0	0	0
1	0.924174	0.761197	0	0	0	0.116748	0
1	0.974104	0.76765	0	0	0	0	0.243725
1	0.924174	0.761197	0	0	0	0	0
1	0.947742	0.776105	0	0	0	0	0
1	0.417998	0.813667	0	0	0	0	0
1	0.364905	0.791647	0	0	0	0	0
1	0.947742	0.776105	0	0	0	0	0
1	0.788057	0	0	0	0	0	0
1	0.417998	0.813667	0	0	0	0	0
1	0.924174	0.776105	0	0	0	0	0
1	0.803169	0	0	0	0	0	0
1	0.947742	0.746875	0	0	0	0	0.240624
1	0.364905	0.791647	0	0	0	0	0
1	0.412354	0.813667	0	0	0	0	0
1	0.385198	0.791647	0	0	0	0	0
1	0.788057	0	0	0	0	0	0
1	0.947742	0.776105	0	0	0	0	0
1	0.947742	0.761197	0	0	0	0	0
1	0.924174	0.761197	0	0	0	0.114256	0
1	0.947742	0.776105	0	0	0	0	0
1	0.788057	0	0	0	0	0	0
1	0.924174	0.761197	0	0	0	0.114256	0
1	0.924174	0.761197	0	0	0	0.116748	0
1	0.947742	0.776105	0	0	0	0	0
1	0.788057	0	0	0	0	0	0
1	0.947742	0.761197	0	0	0	0	0
1	0.947742	0.776105	0	0	0	0	0
1	0.788057	0	0	0	0	0	0
1	0.947742	0.776105	0	0	0	0	0
1	0.417998	0.813667	0	0	0	0	0
1	0.924174	0.776105	0	0	0	0	0
1	0.417998	0.813667	0	0	0	0	0
1	0.924174	0.761197	0	0	0	0.116748	0
1	0.788057	0	0	0	0	0	0
1	0.924174	0.761197	0	0	0	0.119258	0
1	0.947742	0.776105	0	0	0	0	0
1	0.924174	0.761197	0	0	0	0	0
1	0.924174	0.761197	0	0	0	0.116748	0
1	0.924174	0.761197	0	0	0	0.119258	0
1	0.924174	0.776105	0	0	0	0	0
1	0.803169	0	0	0	0	0	0
1	0.924174	0.776105	0	0	0	0	0
1	0.947742	0.776105	0	0	0	0	0
1	0.374911	0.791647	0	0	0	0	0
1	0.924174	0.791647	0	0	0	0	0
1	0.924174	0.791647	0	0	0	0	0
1	0.902035	0.776105	0	0	0	0.12433	0
1	0.788057	0	0	0	0	0	0
1	0.947742	0.761197	0	0	0	0	0
1	0.924174	0.761197	0	0	0	0	0
1	0.423729	0.813667	0	0	0	0	0
1	0.902035	0.776105	0	0	0	0.12433	0
1	0.788057	0	0	0	0	0	0
1	0.924174	0.761197	0	0	0	0.116748	0
1	0.924174	0.761197	0	0	0	0.119258	0
1	0.947742	0.776105	0	0	0	0	0
1	0.924174	0.761197	0	0	0	0.114256	0
1	0.369874	0.791647	0	0	0	0	0
1	0.417998	0.813667	0	0	0	0	0
1	0.974104	0.76765	0	0	0	0	0.243725
1	0.974104	0.76765	0	0	0	0	0.243725
1	0.355166	0.791647	0	0	0	0	0
1	0.924174	0.761197	0	0	0	0.119258	0
1	0.924174	0.761197	0	0	0	0.116748	0
1	0.360003	0.791647	0	0	0	0	0
1	0.369874	0.791647	0	0	0	0	0
1	0.924174	0.761197	0	0	0	0.116748	0
1	0.947742	0.776105	0	0	0	0	0
1	0.947742	0.746875	0	0	0	0	0.237129
1	0.947742	0.761197	0	0	0	0	0
1	0.369874	0.791647	0	0	0	0	0
1	0.947742	0.776105	0	0	0	0	0
1	0.417998	0.813667	0	0	0	0	0
1	0.924174	0.761197	0	0	0	0.116748	0
1	0.803169	0	0	0	0	0	0
1	0.947742	0.761197	0	0	0	0	0
1	0.947742	0.746875	0	0	0	0.104451	0.240624
1	0.380018	0.791647	0	0	0	0	0
1	0.924174	0.776105	0	0	0	0	0
1	0.380018	0.791647	0	0	0	0	0
1	0.924174	0.761197	0	0	0	0.116748	0
1	0.974104	0.753484	0	0	0	0	0.247317
1	0.374911	0.791647	0	0	0	0	0
1	0.924174	0.776105	0	0	0	0	0
1	0.924174	0.761197	0	0	0	0.116748	0
1	0.924174	0.761197	0	0	0	0.116748	0
1	0.924174	0.761197	0	0	0	0.116748	0
1	0.788057	0	0	0	0	0	0
1	0.947742	0.746875	0	0	0	0	0.237129
1	0.924174	0.761197	0	0	0	0	0
1	0.423729	0.813667	0	0	0	0	0
1	0.385198	0.791647	0	0	0	0	0
1	0.924174	0.776105	0	0	0	0	0
1	0.924174	0.776105	0	0	0	0	0
1	0.947742	0.776105	0	0	0	0	0
1	0.947742	0.746875	0	0	0	0	0.233668
1	0.788057	0	0	0	0	0	0
1	0.417998	0.813667	0	0	0	0	0
1	0.947742	0.776105	0	0	0	0	0
1	0.924174	0.776105	0	0	0	0	0
1	0.417998	0.813667	0	0	0	0	0
1	0.374911	0.791647	0	0	0	0	0
1	0.924174	0.761197	0	0	0	0.114256	0
1	0.974104	0.753484	0	0	0	0.104879	0.247317
1	0.924174	0.761197	0	0	0	0	0
1	0.947742	0.746875	0	0	0	0.102041	0.233668
1	0.902035	0.776105	0	0	0	0.116748	0
1	0.924174	0.761197	0	0	0	0.114256	0
1	0.412354	0.813667	0	0	0	0	0
1	0.947742	0.776105	0	0	0	0	0
1	0.369874	0.791647	0	0	0	0	0
1	0.417998	0.813667	0	0	0	0	0
1	0.924174	0.776105	0	0	0	0	0
1	0.924174	0.791647	0	0	0	0	0
1	0.947742	0.746875	0	0	0	0.102041	0.237129
1	0.924174	0.761197	0	0	0	0.116748	0
1	0.924174	0.761197	0	0	0	0.116748	0
1	0.924174	0.761197	0	0	0	0.114256	0
1	0.788057	0	0	0	0	0	0
1	0.374911	0.791647	0	0	0	0	0
1	0.380018	0.791647	0	0	0	0	0
1	0.902035	0.776105	0	0	0	0.11178	0
1	0.417998	0.813667	0	0	0	0	0
1	0.374911	0.791647	0	0	0	0	0
1	0.947742	0.761197	0	0	0	0	0
1	0.947742	0.746875	0	0	0	0	0.233668
1	0.788057	0	0	0	0	0	0
1	0.788057	0	0	0	0	0	0
1	0.788057	0	0	0	0	0	0
1	0.788057	0	0	0	0	0	0
1	0.902035	0.776105	0	0	0	0.119258	0
1	0.417998	0.813667	0	0	0	0	0
1	0.423729	0.813667	0	0	0	0	0
1	0.788057	0	0	0	0	0	0
1	0.924174	0.776105	0	0	0	0	0
1	0.924174	0.761197	0	0	0	0.116748	0
1	0.902035	0.776105	0	0	0	0.114256	0
1	0.947742	0.746875	0	0	0	0.104451	0.237129
1	0.902035	0.776105	0	0	0	0.116748	0
1	0.417998	0.813667	0	0	0	0	0
1	0.947742	0.746875	0	0	0	0.102041	0.237129
1	0.364905	0.791647	0	0	0	0	0
1	0.924174	0.776105	0	0	0	0	0
1	0.924174	0.761197	0	0	0	0.116748	0
1	0.788057	0	0	0	0	0	0
1	0.417998	0.813667	0	0	0	0	0
1	0.924174	0.761197	0	0	0	0	0
1	0.947742	0.746875	0	0	0	0.102041	0.237129
1	0.947742	0.776105	0	0	0	0	0
1	0.902035	0.776105	0	0	0	0.121785	0
1	0.417998	0.813667	0	0	0	0	0
1	0.788057	0	0	0	0	0	0
1	0.924174	0.761197	0	0	0	0.116748	0
1	0.947742	0.746875	0	0	0	0.104451	0.237129
1	0.947742	0.746875	0	0	0	0	0.240624
1	0.924174	0.761197	0	0	0	0.119258	0
1	0.417998	0.813667	0	0	0	0	0
1	0.369874	0.791647	0	0	0	0	0
1	0.947742	0.776105	0	0	0	0	0
1	0.902035	0.776105	0	0	0	0.116748	0
1	0.924174	0.761197	0	0	0	0.116748	0
1	0.924174	0.761197	0	0	0	0.116748	0
1	0.412354	0.813667	0	0	0	0	0
1	0.974104	0.753484	0	0	0	0	0.247317
1	0.417998	0.813667	0	0	0	0	0
1	0.924174	0.761197	0	0	0	0.119258	0
1	0.947742	0.776105	0	0	0	0	0
1	0.788057	0	0	0	0	0	0
1	0.924174	0.761197	0	0	0	0.119258	0
1	0.974104	0.76765	0	0	0	0	0.240168
1	0.924174	0.761197	0	0	0	0.116748	0
1	0.924174	0.761197	0	0	0	0	0
1	0.380018	0.791647	0	0	0	0	0
1	0.947742	0.761197	0	0	0	0	0
1	0.924174	0.761197	0	0	0	0.116748	0
1	0.924174	0.791647	0	0	0	0	0
1	0.947742	0.776105	0	0	0	0	0
1	0.924174	0.761197	0	0	0	0.119258	0
1	0.374911	0.791647	0	0	0	0	0
1	0.924174	0.761197	0	0	0	0.116748	0
1	0.788057	0	0	0	0	0	0
1	0.947742	0.776105	0	0	0	0	0
1	0.947742	0.776105	0	0	0	0	0
1	0.924174	0.761197	0	0	0	0.116748	0
1	0.902035	0.776105	0	0	0	0.114256	0
1	0.947742	0.776105	0	0	0	0	0
1	0.974104	0.753484	0	0	0	0.104879	0.247317
1	0.924174	0.791647	0	0	0	0	0
1	0.788057	0	0	0	0	0	0
1	0.924174	0.761197	0	0	0	0	0
1	0.924174	0.761197	0	0	0	0	0
1	0.947742	0.776105	0	0	0	0	0
1	0.924174	0.776105	0	0	0	0	0
1	0.924174	0.761197	0	0	0	0.114256	0
1	0.924174	0.791647	0	0	0	0	0
1	0.406793	0.813667	0	0	0	0	0
1	0.374911	0.791647	0	0	0	0	0
1	0.924174	0.776105	0	0	0	0.116748	0
1	0.924174	0.761197	0	0	0	0.116748	0
1	0.924174	0.761197	0	0	0	0.114256	0
1	0.947742	0.761197	0	0	0	0	0
1	0.924174	0.761197	0	0	0	0.116748	0
1	0.369874	0.791647	0	0	0	0	0
1	0.947742	0.776105	0	0	0	0	0
1	0.364905	0.791647	0	0	0	0	0
1	0.788057	0	0	0	0	0	0
1	0.924174	0.761197	0	0	0	0.116748	0
1	0.924174	0.761197	0	0	0	0.116748	0
1	0.374911	0.791647	0	0	0	0	0
1	0.924174	0.761197	0	0	0	0.116748	0
1	0.974104	0.76765	0	0	0	0.107357	0.243725
1	0.417998	0.813667	0	0	0	0	0
1	0.974104	0.753484	0	0	0	0.104879	0.243725
1	0.947742	0.776105	0	0	0	0	0
1	0.417998	0.813667	0	0	0	0	0
1	0.924174	0.791647	0	0	0	0	0
1	0.947742	0.776105	0	0	0	0	0
1	0.902035	0.776105	0	0	0	0.114256	0
1	0.974104	0.753484	0	0	0	0	0.247317
1	0.947742	0.776105	0	0	0	0	0
1	0.947742	0.746875	0	0	0	0	0.237129
1	0.417998	0.813667	0	0	0	0	0
1	0.924174	0.761197	0	0	0	0.116748	0
1	0.947742	0.746875	0	0	0	0.102041	0.237129
1	0.788057	0	0	0	0	0	0
1	0.417998	0.813667	0	0	0	0	0
1	0.364905	0.791647	0	0	0	0	0
1	0.417998	0.813667	0	0	0	0	0
1	0.924174	0.791647	0	0	0	0	0
1	0.974104	0.753484	0	0	0	0	0.247317
1	0.417998	0.813667	0	0	0	0	0
1	0.380018	0.791647	0	0	0	0	0
1	0.360003	0.791647	0	0	0	0	0
1	0.924174	0.761197	0	0	0	0.114256	0
1	0.788057	0	0	0	0	0	0
1	0.412354	0.813667	0	0	0	0	0
1	0.924174	0.761197	0	0	0	0.116748	0
1	0.924174	0.761197	0	0	0	0.116748	0
1	0.924174	0.761197	0	0	0	0	0
1	0.385198	0.791647	0	0	0	0	0
1	0.417998	0.813667	0	0	0	0	0
1	0.788057	0	0	0	0	0	0
1	0.947742	0.776105	0	0	0	0	0
1	0.788057	0	0	0	0	0	0
1	0.364905	0.791647	0	0	0	0	0
1	0.902035	0.776105	0	0	0	0.119258	0
1	0.924174	0.776105	0	0	0	0.11178	0
1	0.788057	0	0	0	0	0	0
1	0.974104	0.753484	0	0	0	0	0.247317
1	0.417998	0.813667	0	0	0	0	0
1	0.924174	0.761197	0	0	0	0	0
1	0.380018	0.791647	0	0	0	0	0
1	0.947742	0.776105	0	0	0	0	0
1	0.924174	0.761197	0	0	0	0.114256	0
1	0.924174	0.761197	0	0	0	0.114256	0
1	0.947742	0.776105	0	0	0	0	0
1	0.924174	0.761197	0	0	0	0.116748	0
1	0.364905	0.791647	0	0	0	0	0
1	0.385198	0.791647	0	0	0	0	0
1	0.355166	0.791647	0	0	0	0	0
1	0.924174	0.761197	0	0	0	0.116748	0
1	0.374911	0.791647	0	0	0	0	0
1	0.369874	0.791647	0	0	0	0	0
1	0.924174	0.776105	0	0	0	0	0
1	0.947742	0.761197	0	0	0	0	0
1	0.417998	0.813667	0	0	0	0	0
1	0.924174	0.761197	0	0	0	0.114256	0
1	0.788057	0	0	0	0	0	0
1	0.364905	0.791647	0	0	0	0	0
1	0.902035	0.776105	0	0	0	0.12433	0
1	0.902035	0.776105	0	0	0	0.12433	0
1	0.974104	0.753484	0	0	0	0	0.247317
1	0.947742	0.746875	0	0	0	0.102041	0.240624
1	0.417998	0.813667	0	0	0	0	0
1	0.417998	0.813667	0	0	0	0	0
1	0.380018	0.791647	0	0	0	0	0
1	0.417998	0.813667	0	0	0	0	0
1	0.947742	0.746875	0	0	0	0.104451	0.244152
1	0.364905	0.791647	0	0	0	0	0
1	0.788057	0	0	0	0	0	0
1	0.924174	0.761197	0	0	0	0.119258	0
1	0.788057	0	0	0	0	0	0
1	0.947742	0.761197	0	0	0	0	0
1	0.788057	0	0	0	0	0	0
1	0.902035	0.776105	0	0	0	0.121785	0
1	0.924174	0.791647	0	0	0	0	0
1	0.924174	0.761197	0	0	0	0.116748	0
1	0.924174	0.761197	0	0	0	0.116748	0
1	0.380018	0.791647	0	0	0	0	0
1	0.924174	0.761197	0	0	0	0.119258	0
1	0.947742	0.776105	0	0	0	0	0
1	0.369874	0.791647	0	0	0	0	0
1	0.924174	0.776105	0	0	0	0	0
1	0.924174	0.791647	0	0	0	0	0
1	0.947742	0.746875	0	0	0	0	0.233668
1	0.974104	0.753484	0	0	0	0	0.247317
1	0.974104	0.76765	0	0	0	0	0.243725
1	0.355166	0.791647	0	0	0	0	0
1	0.974104	0.76765	0	0	0	0	0.243725
1	0.417998	0.813667	0	0	0	0	0
1	0.947742	0.776105	0	0	0	0	0
1	0.947742	0.776105	0	0	0	0	0
1	0.380018	0.791647	0	0	0	0	0
1	0.902035	0.776105	0	0	0	0.121785	0
1	0.924174	0.761197	0	0	0	0.119258	0
1	0.788057	0	0	0	0	0	0
1	0.417998	0.813667	0	0	0	0	0
1	0.417998	0.813667	0	0	0	0	0
1	0.380018	0.791647	0	0	0	0	0
1	0.947742	0.746875	0	0	0	0.102041	0.233668
1	0.380018	0.791647	0	0	0	0	0
1	0.924174	0.761197	0	0	0	0.119258	0
1	0.788057	0	0	0	0	0	0
1	0.380018	0.791647	0	0	0	0	0
1	0.803169	0	0	0	0	0	0
1	0.947742	0.776105	0	0	0	0	0
1	0.417998	0.813667	0	0	0	0	0
1	0.924174	0.776105	0	0	0	0	0
1	0.947742	0.746875	0	0	0	0.104451	0.237129
1	0.788057	0	0	0	0	0	0
1	0.924174	0.761197	0	0	0	0.116748	0
1	0.947742	0.746875	0	0	0	0.106878	0.237129
1	0.417998	0.813667	0	0	0	0	0
1	0.974104	0.753484	0	0	0	0	0.247317
1	0.380018	0.791647	0	0	0	0	0
1	0.924174	0.761197	0	0	0	0.116748	0
1	0.947742	0.746875	0	0	0	0	0.233668
1	0.417998	0.813667	0	0	0	0	0
1	0.924174	0.776105	0	0	0	0	0
1	0.417998	0.813667	0	0	0	0	0
1	0.947742	0.776105	0	0	0	0	0
1	0.374911	0.791647	0	0	0	0	0
1	0.974104	0.753484	0	0	0	0.107357	0.247317
1	0.924174	0.761197	0	0	0	0.119258	0
1	0.924174	0.761197	0	0	0	0.119258	0
1	0.947742	0.761197	0	0	0	0	0
1	0.902035	0.776105	0	0	0	0.116748	0
1	0.417998	0.813667	0	0	0	0	0
1	0.788057	0	0	0	0	0	0
1	0.924174	0.776105	0	0	0	0	0
1	0.374911	0.791647	0	0	0	0	0
1	0.803169	0	0	0	0	0	0
1	0.788057	0	0	0	0	0	0
1	0.924174	0.776105	0	0	0	0.119258	0
1	0.788057	0	0	0	0	0	0
1	0.924174	0.761197	0	0	0	0.119258	0
1	0.974104	0.753484	0	0	0	0	0.243725
1	0.924174	0.776105	0	0	0	0.114256	0
1	0.788057	0	0	0	0	0	0
1	0.788057	0	0	0	0	0	0
1	0.924174	0.776105	0	0	0	0	0
1	0.947742	0.776105	0	0	0	0	0
1	0.423729	0.813667	0	0	0	0	0
1	0.947742	0.761197	0	0	0	0	0
1	0.417998	0.813667	0	0	0	0	0
1	0.947742	0.776105	0	0	0	0	0
1	0.788057	0	0	0	0	0	0
1	0.947742	0.746875	0	0	0	0	0.240624
1	0.803169	0	0	0	0	0	0
1	0.374911	0.791647	0	0	0	0	0
1	0.924174	0.761197	0	0	0	0.119258	0
1	0.924174	0.761197	0	0	0	0.116748	0
1	0.947742	0.776105	0	0	0	0	0
1	0.924174	0.761197	0	0	0	0.114256	0
1	0.947742	0.776105	0	0	0	0	0
1	0.947742	0.776105	0	0	0	0	0
1	0.924174	0.761197	0	0	0	0.116748	0
1	0.924174	0.791647	0	0	0	0	0
1	0.947742	0.776105	0	0	0	0	0
1	0.417998	0.813667	0	0	0	0	0
1	0.788057	0	0	0	0	0	0
1	0.924174	0.791647	0	0	0	0	0
1	0.412354	0.813667	0	0	0	0	0
1	0.947742	0.746875	0	0	0	0.102041	0.237129
1	0.369874	0.791647	0	0	0	0	0
1	0.355166	0.791647	0	0	0	0	0
1	0.924174	0.776105	0	0	0	0	0
1	0.974104	0.753484	0	0	0	0	0.247317
1	0.924174	0.776105	0	0	0	0	0
1	0.364905	0.791647	0	0	0	0	0
1	0.374911	0.791647	0	0	0	0	0
1	0.947742	0.746875	0	0	0	0.104451	0.244152
1	0.947742	0.761197	0	0	0	0	0
1	0.924174	0.761197	0	0	0	0.114256	0
1	0.947742	0.761197	0	0	0	0	0
1	0.947742	0.776105	0	0	0	0	0
1	0.788057	0	0	0	0	0	0
1	0.924174	0.791647	0	0	0	0	0
1	0.788057	0	0	0	0	0	0
1	0.947742	0.776105	0	0	0	0	0
1	0.788057	0	0	0	0	0	0
1	0.947742	0.776105	0	0	0	0	0
1	0.924174	0.761197	0	0	0	0.116748	0
1	0.924174	0.761197	0	0	0	0.116748	0
1	0.947742	0.776105	0	0	0	0	0
1	0.924174	0.761197	0	0	0	0.119258	0
1	0.974104	0.76765	0	0	0	0	0.240168
1	0.902035	0.776105	0	0	0	0.119258	0
1	0.417998	0.813667	0	0	0	0	0
1	0.947742	0.776105	0	0	0	0	0
1	0.902035	0.776105	0	0	0	0.12433	0
1	0.947742	0.746875	0	0	0	0.104451	0.237129
1	0.924174	0.776105	0	0	0	0	0
1	0.788057	0	0	0	0	0	0
1	0.947742	0.761197	0	0	0	0	0
1	0.423729	0.813667	0	0	0	0	0
1	0.974104	0.753484	0	0	0	0	0.247317
1	0.803169	0	0	0	0	0	0
1	0.974104	0.76765	0	0	0	0	0.243725
1	0.947742	0.746875	0	0	0	0.102041	0.240624
1	0.974104	0.753484	0	0	0	0	0.247317
1	0.902035	0.776105	0	0	0	0.116748	0
1	0.924174	0.761197	0	0	0	0.116748	0
1	0.417998	0.813667	0	0	0	0	0
1	0.947742	0.776105	0	0	0	0	0
1	0.947742	0.776105	0	0	0	0	0
1	0.374911	0.791647	0	0	0	0	0
1	0.417998	0.813667	0	0	0	0	0
1	0.788057	0	0	0	0	0	0
1	0.902035	0.776105	0	0	0	0.116748	0
1	0.947742	0.761197	0	0	0	0	0
1	0.369874	0.791647	0	0	0	0	0
1	0.417998	0.813667	0	0	0	0	0
1	0.924174	0.791647	0	0	0	0	0
1	0.924174	0.761197	0	0	0	0.116748	0
1	0.380018	0.791647	0	0	0	0	0
1	0.924174	0.761197	0	0	0	0.116748	0
1	0.974104	0.753484	0	0	0	0.104879	0.247317
1	0.924174	0.761197	0	0	0	0.119258	0
1	0.974104	0.76765	0	0	0	0	0.240168
1	0.924174	0.776105	0	0	0	0	0
1	0.947742	0.761197	0	0	0	0	0
1	0.924174	0.761197	0	0	0	0.114256	0
1	0.374911	0.791647	0	0	0	0	0
1	0.974104	0.753484	0	0	0	0	0.247317
1	0.947742	0.776105	0	0	0	0	0
1	0.788057	0	0	0	0	0	0
1	0.417998	0.813667	0	0	0	0	0
1	0.374911	0.791647	0	0	0	0	0
1	0.924174	0.761197	0	0	0	0.114256	0
1	0.788057	0	0	0	0	0	0
1	0.947742	0.746875	0	0	0	0	0.233668
1	0.924174	0.761197	0	0	0	0.116748	0
1	0.788057	0	0	0	0	0	0
1	0.947742	0.761197	0	0	0	0	0
1	0.924174	0.791647	0	0	0	0	0
1	0.924174	0.776105	0	0	0	0	0
1	0.924174	0.776105	0	0	0	0	0
1	0.924174	0.761197	0	0	0	0.116748	0
1	0.364905	0.791647	0	0	0	0	0
1	0.924174	0.761197	0	0	0	0.114256	0
1	0.412354	0.813667	0	0	0	0	0
1	0.788057	0	0	0	0	0	0
1	0.417998	0.813667	0	0	0	0	0
1	0.380018	0.791647	0	0	0	0	0
1	0.374911	0.791647	0	0	0	0	0
1	0.924174	0.761197	0	0	0	0.119258	0
1	0.947742	0.776105	0	0	0	0	0
1	0.788057	0	0	0	0	0	0
1	0.788057	0	0	0	0	0	0
1	0.385198	0.791647	0	0	0	0	0
1	0.947742	0.776105	0	0	0	0	0
1	0.902035	0.776105	0	0	0	0.119258	0
1	0.924174	0.776105	0	0	0	0	0
1	0.924174	0.776105	0	0	0	0	0
1	0.380018	0.791647	0	0	0	0	0
1	0.924174	0.761197	0	0	0	0.116748	0
1	0.924174	0.761197	0	0	0	0.114256	0
1	0.417998	0.813667	0	0	0	0	0
1	0.947742	0.746875	0	0	0	0	0.233668
1	0.417998	0.813667	0	0	0	0	0
1	0.412354	0.813667	0	0	0	0	0
1	0.385198	0.791647	0	0	0	0	0
1	0.417998	0.813667	0	0	0	0	0
1	0.360003	0.791647	0	0	0	0	0
1	0.788057	0	0	0	0	0	0
1	0.974104	0.76765	0	0	0	0	0.243725
1	0.374911	0.791647	0	0	0	0	0
1	0.947742	0.761197	0	0	0	0	0
1	0.947742	0.776105	0	0	0	0	0
1	0.390453	0.791647	0	0	0	0	0
1	0.924174	0.761197	0	0	0	0.116748	0
1	0.902035	0.776105	0	0	0	0.119258	0
1	0.947742	0.776105	0	0	0	0	0
1	0.947742	0.761197	0	0	0	0	0
1	0.417998	0.813667	0	0	0	0	0
1	0.974104	0.76765	0	0	0	0	0.240168
1	0.924174	0.761197	0	0	0	0.116748	0
1	0.947742	0.776105	0	0	0	0	0
1	0.417998	0.813667	0	0	0	0	0
1	0.947742	0.776105	0	0	0	0	0
1	0.974104	0.753484	0	0	0	0	0.247317
1	0.947742	0.746875	0	0	0	0.102041	0.240624
1	0.417998	0.813667	0	0	0	0	0
1	0.924174	0.776105	0	0	0	0	0
1	0.947742	0.776105	0	0	0	0	0
1	0.947742	0.776105	0	0	0	0	0
1	0.788057	0	0	0	0	0	0
1	0.788057	0	0	0	0	0	0
1	0.924174	0.776105	0	0	0	0	0
1	0.902035	0.776105	0	0	0	0.121785	0
1	0.788057	0	0	0	0	0	0
1	0.947742	0.761197	0	0	0	0	0
1	0.947742	0.746875	0	0	0	0.102041	0.237129
1	0.924174	0.761197	0	0	0	0.116748	0
1	0.947742	0.776105	0	0	0	0	0
1	0.360003	0.791647	0	0	0	0	0
1	0.924174	0.761197	0	0	0	0.116748	0
1	0.924174	0.761197	0	0	0	0.116748	0
1	0.924174	0.776105	0	0	0	0	0
1	0.369874	0.791647	0	0	0	0	0
1	0.385198	0.791647	0	0	0	0	0
1	0.924174	0.761197	0	0	0	0.116748	0
1	0.924174	0.791647	0	0	0	0	0
1	0.423729	0.813667	0	0	0	0	0
1	0.947742	0.746875	0	0	0	0.104451	0.237129
1	0.412354	0.813667	0	0	0	0	0
1	0.924174	0.761197	0	0	0	0.116748	0
1	0.412354	0.813667	0	0	0	0	0
1	0.974104	0.753484	0	0	0	0	0.243725
1	0.947742	0.776105	0	0	0	0	0
1	0.417998	0.813667	0	0	0	0	0
1	0.947742	0.761197	0	0	0	0	0
1	0.924174	0.776105	0	0	0	0	0
1	0.947742	0.761197	0	0	0	0	0
1	0.974104	0.753484	0	0	0	0.104879	0.247317
1	0.924174	0.776105	0	0	0	0	0
1	0.364905	0.791647	0	0	0	0	0
1	0.924174	0.761197	0	0	0	0.114256	0
1	0.974104	0.76765	0	0	0	0	0.240168
1	0.924174	0.761197	0	0	0	0.119258	0
1	0.924174	0.776105	0	0	0	0	0
1	0.924174	0.776105	0	0	0	0	0
1	0.423729	0.813667	0	0	0	0	0
1	0.788057	0	0	0	0	0	0
1	0.924174	0.761197	0	0	0	0.119258	0
1	0.360003	0.791647	0	0	0	0	0
1	0.974104	0.753484	0	0	0	0.104879	0.243725
1	0.924174	0.776105	0	0	0	0.116748	0
1	0.385198	0.791647	0	0	0	0	0
1	0.803169	0	0	0	0	0	0
1	0.924174	0.776105	0	0	0	0	0
1	0.788057	0	0	0	0	0	0
1	0.947742	0.776105	0	0	0	0	0
1	0.788057	0	0	0	0	0	0
1	0.947742	0.746875	0	0	0	0	0.233668
1	0.924174	0.791647	0	0	0	0	0
1	0.947742	0.776105	0	0	0	0	0
1	0.385198	0.791647	0	0	0	0	0
1	0.902035	0.776105	0	0	0	0.121785	0
1	0.788057	0	0	0	0	0	0
1	0.924174	0.761197	0	0	0	0.116748	0
1	0.924174	0.761197	0	0	0	0.116748	0
1	0.385198	0.791647	0	0	0	0	0
1	0.417998	0.813667	0	0	0	0	0
1	0.380018	0.791647	0	0	0	0	0
1	0.947742	0.761197	0	0	0	0	0
1	0.947742	0.746875	0	0	0	0	0.233668
1	0.364905	0.791647	0	0	0	0	0
1	0.902035	0.776105	0	0	0	0.114256	0
1	0.417998	0.813667	0	0	0	0	0
1	0.788057	0	0	0	0	0	0
1	0.803169	0	0	0	0	0	0
1	0.902035	0.776105	0	0	0	0.114256	0
1	0.369874	0.791647	0	0	0	0	0
1	0.947742	0.746875	0	0	0	0.104451	0.237129
1	0.423729	0.813667	0	0	0	0	0
1	0.974104	0.753484	0	0	0	0.104879	0.247317
1	0.947742	0.746875	0	0	0	0	0.233668
1	0.947742	0.761197	0	0	0	0	0
1	0.380018	0.791647	0	0	0	0	0
1	0.947742	0.761197	0	0	0	0	0
1	0.417998	0.813667	0	0	0	0	0
1	0.417998	0.813667	0	0	0	0	0
1	0.924174	0.791647	0	0	0	0	0
1	0.924174	0.776105	0	0	0	0	0
1	0.947742	0.776105	0	0	0	0	0
1	0.423729	0.813667	0	0	0	0	0
1	0.924174	0.761197	0	0	0	0.116748	0
1	0.423729	0.813667	0	0	0	0	0
1	0.947742	0.746875	0	0	0	0.102041	0.233668
1	0.924174	0.791647	0	0	0	0	0
1	0.380018	0.791647	0	0	0	0	0
1	0.947742	0.776105	0	0	0	0	0
1	0.924174	0.776105	0	0	0	0	0
1	0.947742	0.746875	0	0	0	0.102041	0.244152
1	0.924174	0.776105	0	0	0	0	0
1	0.924174	0.761197	0	0	0	0.116748	0
1	0.374911	0.791647	0	0	0	0	0
1	0.924174	0.761197	0	0	0	0.114256	0
1	0.417998	0.813667	0	0	0	0	0
1	0.924174	0.761197	0	0	0	0	0
1	0.369874	0.791647	0	0	0	0	0
1	0.947742	0.746875	0	0	0	0.102041	0.237129
1	0.417998	0.813667	0	0	0	0	0
1	0.947742	0.761197	0	0	0	0	0
1	0.417998	0.813667	0	0	0	0	0
1	0.947742	0.776105	0	0	0	0	0
1	0.947742	0.776105	0	0	0	0	0
1	0.374911	0.791647	0	0	0	0	0
1	0.947742	0.776105	0	0	0	0	0
1	0.924174	0.761197	0	0	0	0.116748	0
1	0.924174	0.776105	0	0	0	0	0
1	0.385198	0.791647	0	0	0	0	0
1	0.924174	0.761197	0	0	0	0.116748	0
1	0.374911	0.791647	0	0	0	0	0
1	0.369874	0.791647	0	0	0	0	0
1	0.947742	0.761197	0	0	0	0	0
1	0.947742	0.761197	0	0	0	0	0
1	0.947742	0.746875	0	0	0	0.102041	0.233668
1	0.947742	0.746875	0	0	0	0.102041	0.233668
1	0.902035	0.776105	0	0	0	0.119258	0
1	0.947742	0.776105	0	0	0	0	0
1	0.947742	0.761197	0	0	0	0	0
1	0.947742	0.776105	0	0	0	0	0
1	0.417998	0.813667	0	0	0	0	0
1	0.974104	0.76765	0	0	0	0	0.240168
1	0.947742	0.761197	0	0	0	0	0
1	0.924174	0.761197	0	0	0	0	0
1	0.412354	0.813667	0	0	0	0	0
1	0.360003	0.791647	0	0	0	0	0
1	0.924174	0.761197	0	0	0	0	0
1	0.924174	0.791647	0	0	0	0	0
1	0.902035	0.776105	0	0	0	0.119258	0
1	0.788057	0	0	0	0	0	0
1	0.924174	0.761197	0	0	0	0.116748	0
1	0.947742	0.776105	0	0	0	0	0
1	0.360003	0.791647	0	0	0	0	0
1	0.924174	0.791647	0	0	0	0	0
1	0.924174	0.761197	0	0	0	0.119258	0
1	0.974104	0.753484	0	0	0	0	0.247317
1	0.974104	0.76765	0	0	0	0	0.240168
1	0.924174	0.761197	0	0	0	0	0
1	0.788057	0	0	0	0	0	0
1	0.924174	0.791647	0	0	0	0	0
1	0.924174	0.761197	0	0	0	0.119258	0
1	0.947742	0.776105	0	0	0	0	0
1	0.924174	0.776105	0	0	0	0	0
1	0.374911	0.791647	0	0	0	0	0
1	0.947742	0.776105	0	0	0	0	0
1	0.947742	0.776105	0	0	0	0	0
1	0.355166	0.791647	0	0	0	0	0
1	0.380018	0.791647	0	0	0	0	0
1	0.788057	0	0	0	0	0	0
1	0.417998	0.813667	0	0	0	0	0
1	0.803169	0	0	0	0	0	0
1	0.947742	0.761197	0	0	0	0	0
1	0.924174	0.761197	0	0	0	0.116748	0
1	0.423729	0.813667	0	0	0	0	0
1	0.412354	0.813667	0	0	0	0	0
1	0.803169	0	0	0	0	0	0
1	0.974104	0.76765	0	0	0	0	0.240168
1	0.947742	0.776105	0	0	0	0	0
1	0.369874	0.791647	0	0	0	0	0
1	0.788057	0	0	0	0	0	0
1	0.417998	0.813667	0	0	0	0	0
1	0.947742	0.776105	0	0	0	0	0
1	0.788057	0	0	0	0	0	0
1	0.902035	0.776105	0	0	0	0.12433	0
1	0.924174	0.761197	0	0	0	0.114256	0
1	0.902035	0.776105	0	0	0	0.12433	0
1	0.947742	0.746875	0	0	0	0.102041	0.237129
1	0.947742	0.776105	0	0	0	0	0
1	0.924174	0.761197	0	0	0	0	0
1	0.947742	0.776105	0	0	0	0	0
1	0.924174	0.791647	0	0	0	0	0
1	0.924174	0.791647	0	0	0	0	0
1	0.947742	0.776105	0	0	0	0	0
1	0.974104	0.76765	0	0	0	0	0.243725
1	0.947742	0.761197	0	0	0	0	0
1	0.423729	0.813667	0	0	0	0	0
1	0.417998	0.813667	0	0	0	0	0
1	0.924174	0.776105	0	0	0	0	0
1	0.947742	0.776105	0	0	0	0	0
1	0.417998	0.813667	0	0	0	0	0
1	0.417998	0.813667	0	0	0	0	0
1	0.788057	0	0	0	0	0	0
1	0.417998	0.813667	0	0	0	0	0
1	0.947742	0.746875	0	0	0	0.102041	0.237129
1	0.374911	0.791647	0	0	0	0	0
1	0.924174	0.761197	0	0	0	0.116748	0
1	0.947742	0.776105	0	0	0	0	0
1	0.974104	0.753484	0	0	0	0.104879	0.247317
1	0.412354	0.813667	0	0	0	0	0
1	0.924174	0.791647	0	0	0	0	0
1	0.947742	0.776105	0	0	0	0	0
1	0.360003	0.791647	0	0	0	0	0
1	0.924174	0.761197	0	0	0	0	0
1	0.947742	0.776105	0	0	0	0	0
1	0.788057	0	0	0	0	0	0
1	0.417998	0.813667	0	0	0	0	0
1	0.924174	0.776105	0	0	0	0	0
1	0.947742	0.776105	0	0	0	0	0
1	0.947742	0.776105	0	0	0	0	0
1	0.374911	0.791647	0	0	0	0	0
1	0.924174	0.761197	0	0	0	0.116748	0
1	0.374911	0.791647	0	0	0	0	0
1	0.924174	0.761197	0	0	0	0.119258	0
1	0.947742	0.746875	0	0	0	0	0.237129
1	0.924174	0.761197	0	0	0	0.116748	0
1	0.417998	0.813667	0	0	0	0	0
1	0.369874	0.791647	0	0	0	0	0
1	0.924174	0.776105	0	0	0	0	0
1	0.417998	0.813667	0	0	0	0	0
1	0.360003	0.791647	0	0	0	0	0
1	0.924174	0.761197	0	0	0	0.119258	0
1	0.423729	0.813667	0	0	0	0	0
1	0.924174	0.761197	0	0	0	0.116748	0
1	0.924174	0.791647	0	0	0	0	0
1	0.947742	0.776105	0	0	0	0	0
1	0.947742	0.776105	0	0	0	0	0
1	0.788057	0	0	0	0	0	0
1	0.924174	0.791647	0	0	0	0	0
1	0.947742	0.761197	0	0	0	0	0
1	0.924174	0.761197	0	0	0	0	0
1	0.924174	0.761197	0	0	0	0.116748	0
1	0.924174	0.761197	0	0	0	0.114256	0
1	0.364905	0.791647	0	0	0	0	0
1	0.924174	0.761197	0	0	0	0	0
1	0.924174	0.761197	0	0	0	0.119258	0
1	0.947742	0.761197	0	0	0	0	0
1	0.412354	0.813667	0	0	0	0	0
1	0.417998	0.813667	0	0	0	0	0
1	0.947742	0.776105	0	0	0	0	0
1	0.788057	0	0	0	0	0	0
1	0.924174	0.761197	0	0	0	0.116748	0
1	0.902035	0.776105	0	0	0	0.12433	0
1	0.902035	0.776105	0	0	0	0.116748	0
1	0.417998	0.813667	0	0	0	0	0
1	0.924174	0.791647	0	0	0	0	0
1	0.947742	0.761197	0	0	0	0	0
1	0.924174	0.776105	0	0	0	0	0
1	0.924174	0.791647	0	0	0	0	0
1	0.924174	0.761197	0	0	0	0.116748	0
1	0.788057	0	0	0	0	0	0
1	0.374911	0.791647	0	0	0	0	0
1	0.803169	0	0	0	0	0	0
1	0.947742	0.746875	0	0	0	0.102041	0.237129
1	0.360003	0.791647	0	0	0	0	0
1	0.924174	0.761197	0	0	0	0.119258	0
1	0.947742	0.746875	0	0	0	0.102041	0.240624
1	0.924174	0.776105	0	0	0	0	0
1	0.947742	0.776105	0	0	0	0	0
1	0.417998	0.813667	0	0	0	0	0
1	0.924174	0.791647	0	0	0	0	0
1	0.788057	0	0	0	0	0	0
1	0.924174	0.776105	0	0	0	0	0
1	0.924174	0.761197	0	0	0	0.116748	0
1	0.947742	0.761197	0	0	0	0	0
1	0.924174	0.776105	0	0	0	0	0
1	0.924174	0.776105	0	0	0	0	0
1	0.788057	0	0	0	0	0	0
1	0.924174	0.761197	0	0	0	0.114256	0
1	0.974104	0.76765	0	0	0	0.104879	0.240168
1	0.364905	0.791647	0	0	0	0	0
1	0.412354	0.813667	0	0	0	0	0
1	0.417998	0.813667	0	0	0	0	0
1	0.924174	0.761197	0	0	0	0.116748	0
1	0.947742	0.776105	0	0	0	0	0
1	0.369874	0.791647	0	0	0	0	0
1	0.902035	0.776105	0	0	0	0.121785	0
1	0.924174	0.776105	0	0	0	0	0
1	0.417998	0.813667	0	0	0	0	0
1	0.369874	0.791647	0	0	0	0	0
1	0.924174	0.776105	0	0	0	0	0
1	0.417998	0.813667	0	0	0	0	0
1	0.902035	0.776105	0	0	0	0.116748	0
1	0.974104	0.753484	0	0	0	0	0.247317
1	0.947742	0.776105	0	0	0	0	0
1	0.924174	0.761197	0	0	0	0.116748	0
1	0.924174	0.761197	0	0	0	0.119258	0
1	0.364905	0.791647	0	0	0	0	0
1	0.902035	0.776105	0	0	0	0.119258	0
1	0.947742	0.746875	0	0	0	0.102041	0.233668
1	0.380018	0.791647	0	0	0	0	0
1	0.803169	0	0	0	0	0	0
1	0.412354	0.813667	0	0	0	0	0
1	0.947742	0.761197	0	0	0	0	0
1	0.924174	0.761197	0	0	0	0.119258	0
1	0.788057	0	0	0	0	0	0
1	0.380018	0.791647	0	0	0	0	0
1	0.924174	0.776105	0	0	0	0	0
1	0.924174	0.776105	0	0	0	0	0
1	0.788057	0	0	0	0	0	0
1	0.412354	0.813667	0	0	0	0	0
1	0.924174	0.761197	0	0	0	0.116748	0
1	0.947742	0.776105	0	0	0	0	0
1	0.924174	0.761197	0	0	0	0	0
1	0.924174	0.791647	0	0	0	0	0
1	0.924174	0.776105	0	0	0	0.119258	0
1	0.902035	0.776105	0	0	0	0.119258	0
1	0.947742	0.776105	0	0	0	0	0
1	0.788057	0	0	0	0	0	0
1	0.924174	0.761197	0	0	0	0.116748	0
1	0.924174	0.761197	0	0	0	0	0
1	0.803169	0	0	0	0	0	0
1	0.788057	0	0	0	0	0	0
1	0.974104	0.76765	0	0	0	0	0.240168
1	0.924174	0.761197	0	0	0	0.119258	0
1	0.374911	0.791647	0	0	0	0	0
1	0.947742	0.746875	0	0	0	0.104451	0.244152
1	0.947742	0.761197	0	0	0	0	0
1	0.947742	0.761197	0	0	0	0	0
1	0.902035	0.776105	0	0	0	0.119258	0
1	0.803169	0	0	0	0	0	0
1	0.924174	0.761197	0	0	0	0.119258	0
1	0.788057	0	0	0	0	0	0
1	0.947742	0.776105	0	0	0	0	0
1	0.924174	0.776105	0	0	0	0	0
1	0.974104	0.753484	0	0	0	0	0.247317
1	0.947742	0.746875	0	0	0	0.104451	0.237129
1	0.974104	0.753484	0	0	0	0.107357	0.247317
1	0.947742	0.746875	0	0	0	0.104451	0.237129
1	0.412354	0.813667	0	0	0	0	0
1	0.947742	0.776105	0	0	0	0	0
1	0.417998	0.813667	0	0	0	0	0
1	0.417998	0.813667	0	0	0	0	0
1	0.417998	0.813667	0	0	0	0	0
1	0.924174	0.761197	0	0	0	0.116748	0
1	0.924174	0.776105	0	0	0	0	0
1	0.924174	0.791647	0	0	0	0	0
1	0.417998	0.813667	0	0	0	0	0
1	0.947742	0.746875	0	0	0	0.102041	0.233668
1	0.924174	0.776105	0	0	0	0.121785	0
1	0.924174	0.776105	0	0	0	0.121785	0
1	0.947742	0.776105	0	0	0	0	0
1	0.380018	0.791647	0	0	0	0	0
1	0.974104	0.76765	0	0	0	0	0.243725
1	0.788057	0	0	0	0	0	0
1	0.369874	0.791647	0	0	0	0	0
1	0.947742	0.746875	0	0	0	0.102041	0.240624
1	0.924174	0.761197	0	0	0	0.116748	0
1	0.360003	0.791647	0	0	0	0	0
1	0.417998	0.813667	0	0	0	0	0
1	0.902035	0.776105	0	0	0	0.11178	0
1	0.417998	0.813667	0	0	0	0	0
1	0.947742	0.746875	0	0	0	0	0.237129
1	0.417998	0.813667	0	0	0	0	0
1	0.423729	0.813667	0	0	0	0	0
1	0.417998	0.813667	0	0	0	0	0
1	0.364905	0.791647	0	0	0	0	0
1	0.947742	0.761197	0	0	0	0	0
1	0.924174	0.791647	0	0	0	0	0
1	0.360003	0.791647	0	0	0	0	0
1	0.947742	0.776105	0	0	0	0	0
1	0.369874	0.791647	0	0	0	0	0
1	0.924174	0.776105	0	0	0	0.121785	0
1	0.947742	0.761197	0	0	0	0	0
1	0.947742	0.761197	0	0	0	0	0
1	0.947742	0.746875	0	0	0	0.102041	0.237129
1	0.974104	0.76765	0	0	0	0	0.240168
1	0.924174	0.761197	0	0	0	0	0
1	0.974104	0.753484	0	0	0	0	0.247317
1	0.947742	0.776105	0	0	0	0	0
1	0.924174	0.761197	0	0	0	0.116748	0
1	0.924174	0.761197	0	0	0	0.116748	0
1	0.947742	0.776105	0	0	0	0	0
1	0.412354	0.813667	0	0	0	0	0
1	0.924174	0.761197	0	0	0	0.119258	0
1	0.924174	0.776105	0	0	0	0	0
1	0.924174	0.761197	0	0	0	0	0
1	0.924174	0.761197	0	0	0	0.116748	0
1	0.924174	0.761197	0	0	0	0	0
1	0.974104	0.76765	0	0	0	0	0.243725
1	0.947742	0.761197	0	0	0	0	0
1	0.924174	0.776105	0	0	0	0	0
1	0.947742	0.776105	0	0	0	0	0
1	0.947742	0.776105	0	0	0	0	0
1	0.924174	0.791647	0	0	0	0	0
1	0.974104	0.753484	0	0	0	0	0.247317
1	0.924174	0.761197	0	0	0	0	0
1	0.788057	0	0	0	0	0	0
1	0.947742	0.776105	0	0	0	0	0
1	0.412354	0.813667	0	0	0	0	0
1	0.924174	0.791647	0	0	0	0	0
1	0.417998	0.813667	0	0	0	0	0
1	0.974104	0.753484	0	0	0	0.104879	0.247317
1	0.947742	0.761197	0	0	0	0	0
1	0.788057	0	0	0	0	0	0
1	0.423729	0.813667	0	0	0	0	0
1	0.803169	0	0	0	0	0	0
1	0.924174	0.761197	0	0	0	0.116748	0
1	0.788057	0	0	0	0	0	0
1	0.417998	0.813667	0	0	0	0	0
1	0.924174	0.776105	0	0	0	0	0
1	0.417998	0.813667	0	0	0	0	0
1	0.902035	0.776105	0	0	0	0.119258	0
1	0.355166	0.791647	0	0	0	0	0
1	0.417998	0.813667	0	0	0	0	0
1	0.924174	0.776105	0	0	0	0	0
1	0.902035	0.776105	0	0	0	0.121785	0
1	0.924174	0.761197	0	0	0	0.116748	0
1	0.369874	0.791647	0	0	0	0	0
1	0.788057	0	0	0	0	0	0
1	0.924174	0.761197	0	0	0	0.116748	0
1	0.974104	0.753484	0	0	0	0	0.247317
1	0.360003	0.791647	0	0	0	0	0
1	0.924174	0.761197	0	0	0	0.116748	0
1	0.947742	0.761197	0	0	0	0	0
1	0.947742	0.776105	0	0	0	0	0
1	0.947742	0.746875	0	0	0	0	0.237129
1	0.417998	0.813667	0	0	0	0	0
1	0.947742	0.761197	0	0	0	0	0
1	0.947742	0.746875	0	0	0	0.102041	0.240624
1	0.788057	0	0	0	0	0	0
1	0.924174	0.761197	0	0	0	0	0
1	0.803169	0	0	0	0	0	0
1	0.947742	0.761197	0	0	0	0	0
1	0.947742	0.761197	0	0	0	0	0
1	0.924174	0.791647	0	0	0	0	0
1	0.947742	0.776105	0	0	0	0	0
1	0.924174	0.791647	0	0	0	0	0
1	0.803169	0	0	0	0	0	0
1	0.924174	0.761197	0	0	0	0.114256	0
1	0.974104	0.76765	0	0	0	0	0.243725
1	0.417998	0.813667	0	0	0	0	0
1	0.924174	0.791647	0	0	0	0	0
1	0.924174	0.761197	0	0	0	0.119258	0
1	0.924174	0.761197	0	0	0	0	0
1	0.374911	0.791647	0	0	0	0	0
1	0.417998	0.813667	0	0	0	0	0
1	0.788057	0	0	0	0	0	0
1	0.788057	0	0	0	0	0	0
1	0.947742	0.776105	0	0	0	0	0
1	0.803169	0	0	0	0	0	0
1	0.924174	0.791647	0	0	0	0	0
1	0.417998	0.813667	0	0	0	0	0
1	0.417998	0.813667	0	0	0	0	0
1	0.924174	0.761197	0	0	0	0.114256	0
1	0.924174	0.761197	0	0	0	0.114256	0
1	0.380018	0.791647	0	0	0	0	0
1	0.380018	0.791647	0	0	0	0	0
1	0.974104	0.753484	0	0	0	0	0.243725
1	0.380018	0.791647	0	0	0	0	0
1	0.412354	0.813667	0	0	0	0	0
1	0.924174	0.761197	0	0	0	0	0
1	0.974104	0.76765	0	0	0	0	0.243725
1	0.974104	0.753484	0	0	0	0	0.247317
1	0.788057	0	0	0	0	0	0
1	0.947742	0.776105	0	0	0	0	0
1	0.947742	0.776105	0	0	0	0	0
1	0.412354	0.813667	0	0	0	0	0
1	0.924174	0.761197	0	0	0	0.116748	0
1	0.947742	0.746875	0	0	0	0.104451	0.237129
1	0.902035	0.776105	0	0	0	0.119258	0
1	0.364905	0.791647	0	0	0	0	0
1	0.369874	0.791647	0	0	0	0	0
1	0.947742	0.746875	0	0	0	0	0.233668
1	0.417998	0.813667	0	0	0	0	0
1	0.788057	0	0	0	0	0	0
1	0.974104	0.753484	0	0	0	0	0.247317
1	0.788057	0	0	0	0	0	0
1	0.924174	0.791647	0	0	0	0	0
1	0.803169	0	0	0	0	0	0
1	0.412354	0.813667	0	0	0	0	0
1	0.924174	0.776105	0	0	0	0	0
1	0.788057	0	0	0	0	0	0
1	0.924174	0.791647	0	0	0	0	0
1	0.788057	0	0	0	0	0	0
1	0.412354	0.813667	0	0	0	0	0
1	0.947742	0.776105	0	0	0	0	0
1	0.924174	0.761197	0	0	0	0.116748	0
1	0.947742	0.746875	0	0	0	0	0.240624
1	0.947742	0.776105	0	0	0	0	0
1	0.947742	0.761197	0	0	0	0	0
1	0.974104	0.76765	0	0	0	0	0.247317
1	0.947742	0.776105	0	0	0	0	0
1	0.947742	0.776105	0	0	0	0	0
1	0.924174	0.776105	0	0	0	0	0
1	0.947742	0.776105	0	0	0	0	0
1	0.924174	0.761197	0	0	0	0	0
1	0.924174	0.761197	0	0	0	0.114256	0
1	0.947742	0.746875	0	0	0	0.102041	0.237129
1	0.947742	0.776105	0	0	0	0	0
1	0.974104	0.76765	0	0	0	0	0.243725
1	0.947742	0.776105	0	0	0	0	0
1	0.423729	0.813667	0	0	0	0	0
1	0.947742	0.776105	0	0	0	0	0
1	0.924174	0.761197	0	0	0	0.114256	0
1	0.924174	0.761197	0	0	0	0.114256	0
1	0.974104	0.753484	0	0	0	0	0.247317
1	0.924174	0.776105	0	0	0	0	0
1	0.947742	0.746875	0	0	0	0.102041	0.237129
1	0.924174	0.761197	0	0	0	0.114256	0
1	0.902035	0.776105	0	0	0	0.116748	0
1	0.412354	0.813667	0	0	0	0	0
1	0.423729	0.813667	0	0	0	0	0
1	0.947742	0.776105	0	0	0	0	0
1	0.380018	0.791647	0	0	0	0	0
1	0.924174	0.776105	0	0	0	0	0
1	0.412354	0.813667	0	0	0	0	0
1	0.947742	0.761197	0	0	0	0	0
1	0.947742	0.776105	0	0	0	0	0
1	0.788057	0	0	0	0	0	0
1	0.947742	0.761197	0	0	0	0	0
1	0.417998	0.813667	0	0	0	0	0
1	0.924174	0.761197	0	0	0	0.114256	0
1	0.924174	0.776105	0	0	0	0	0
1	0.947742	0.776105	0	0	0	0	0
1	0.947742	0.776105	0	0	0	0	0
1	0.947742	0.761197	0	0	0	0	0
1	0.924174	0.776105	0	0	0	0	0
1	0.947742	0.746875	0	0	0	0.104451	0.237129
1	0.924174	0.761197	0	0	0	0.116748	0
1	0.947742	0.776105	0	0	0	0	0
1	0.924174	0.776105	0	0	0	0	0
1	0.380018	0.791647	0	0	0	0	0
1	0.947742	0.776105	0	0	0	0	0
1	0.924174	0.791647	0	0	0	0	0
1	0.947742	0.761197	0	0	0	0	0
1	0.788057	0	0	0	0	0	0
1	0.374911	0.791647	0	0	0	0	0
1	0.374911	0.791647	0	0	0	0	0
1	0.924174	0.791647	0	0	0	0	0
1	0.417998	0.813667	0	0	0	0	0
1	0.803169	0	0	0	0	0	0
1	0.902035	0.776105	0	0	0	0.119258	0
1	0.385198	0.791647	0	0	0	0	0
1	0.924174	0.761197	0	0	0	0.119258	0
1	0.369874	0.791647	0	0	0	0	0
1	0.364905	0.791647	0	0	0	0	0
1	0.947742	0.776105	0	0	0	0	0
1	0.369874	0.791647	0	0	0	0	0
1	0.947742	0.761197	0	0	0	0	0
1	0.364905	0.791647	0	0	0	0	0
1	0.788057	0	0	0	0	0	0
1	0.924174	0.761197	0	0	0	0.116748	0
1	0.924174	0.776105	0	0	0	0	0
1	0.947742	0.761197	0	0	0	0	0
1	0.924174	0.776105	0	0	0	0.119258	0
1	0.924174	0.776105	0	0	0	0	0
1	0.947742	0.776105	0	0	0	0	0
1	0.417998	0.813667	0	0	0	0	0
1	0.380018	0.791647	0	0	0	0	0
1	0.364905	0.791647	0	0	0	0	0
1	0.423729	0.813667	0	0	0	0	0
1	0.788057	0	0	0	0	0	0
1	0.902035	0.776105	0	0	0	0.119258	0
1	0.788057	0	0	0	0	0	0
1	0.423729	0.813667	0	0	0	0	0
1	0.947742	0.746875	0	0	0	0	0.233668
1	0.417998	0.813667	0	0	0	0	0
1	0.947742	0.761197	0	0	0	0	0
1	0.369874	0.791647	0	0	0	0	0
1	0.924174	0.761197	0	0	0	0.119258	0
1	0.788057	0	0	0	0	0	0
1	0.788057	0	0	0	0	0	0
1	0.788057	0	0	0	0	0	0
1	0.924174	0.776105	0	0	0	0.119258	0
1	0.924174	0.761197	0	0	0	0.114256	0
1	0.788057	0	0	0	0	0	0
1	0.788057	0	0	0	0	0	0
1	0.423729	0.813667	0	0	0	0	0
1	0.412354	0.813667	0	0	0	0	0
1	0.423729	0.813667	0	0	0	0	0
1	0.947742	0.746875	0	0	0	0	0.233668
1	0.947742	0.776105	0	0	0	0	0
1	0.947742	0.761197	0	0	0	0	0
1	0.374911	0.791647	0	0	0	0	0
1	0.924174	0.761197	0	0	0	0	0
1	0.924174	0.776105	0	0	0	0	0
1	0.974104	0.76765	0	0	0	0.104879	0.243725
1	0.947742	0.776105	0	0	0	0	0
1	0.369874	0.791647	0	0	0	0	0
1	0.902035	0.776105	0	0	0	0.119258	0
1	0.924174	0.761197	0	0	0	0.116748	0
1	0.902035	0.776105	0	0	0	0.121785	0
1	0.924174	0.791647	0	0	0	0	0
1	0.947742	0.776105	0	0	0	0	0
1	0.380018	0.791647	0	0	0	0	0
1	0.924174	0.776105	0	0	0	0	0
1	0.947742	0.746875	0	0	0	0.102041	0.240624
1	0.902035	0.776105	0	0	0	0.119258	0
1	0.924174	0.776105	0	0	0	0	0
1	0.380018	0.791647	0	0	0	0	0
1	0.924174	0.761197	0	0	0	0.114256	0
1	0.947742	0.776105	0	0	0	0	0
1	0.924174	0.776105	0	0	0	0	0
1	0.369874	0.791647	0	0	0	0	0
1	0.902035	0.776105	0	0	0	0.119258	0
1	0.423729	0.813667	0	0	0	0	0
1	0.902035	0.776105	0	0	0	0.12433	0
1	0.947742	0.776105	0	0	0	0	0
1	0.947742	0.776105	0	0	0	0	0
1	0.947742	0.746875	0	0	0	0.102041	0.237129
1	0.803169	0	0	0	0	0	0
1	0.947742	0.761197	0	0	0	0	0
1	0.924174	0.761197	0	0	0	0.114256	0
1	0.947742	0.776105	0	0	0	0	0
1	0.924174	0.761197	0	0	0	0.116748	0
1	0.902035	0.776105	0	0	0	0.119258	0
1	0.788057	0	0	0	0	0	0
1	0.947742	0.776105	0	0	0	0	0
1	0.369874	0.791647	0	0	0	0	0
1	0.924174	0.791647	0	0	0	0	0
1	0.947742	0.776105	0	0	0	0	0
1	0.947742	0.776105	0	0	0	0	0
1	0.924174	0.761197	0	0	0	0.116748	0
1	0.364905	0.791647	0	0	0	0	0
1	0.417998	0.813667	0	0	0	0	0
1	0.947742	0.776105	0	0	0	0	0
1	0.947742	0.776105	0	0	0	0	0
1	0.924174	0.761197	0	0	0	0.116748	0
1	0.902035	0.776105	0	0	0	0.119258	0
1	0.924174	0.776105	0	0	0	0	0
1	0.947742	0.776105	0	0	0	0	0
1	0.974104	0.76765	0	0	0	0	0.243725
1	0.947742	0.761197	0	0	0	0	0
1	0.417998	0.813667	0	0	0	0	0
1	0.947742	0.776105	0	0	0	0	0
1	0.947742	0.761197	0	0	0	0	0
1	0.947742	0.746875	0	0	0	0.102041	0.233668
1	0.924174	0.776105	0	0	0	0	0
1	0.924174	0.791647	0	0	0	0	0
1	0.924174	0.776105	0	0	0	0.116748	0
1	0.947742	0.776105	0	0	0	0	0
1	0.423729	0.813667	0	0	0	0	0
1	0.788057	0	0	0	0	0	0
1	0.974104	0.753484	0	0	0	0	0.247317
1	0.974104	0.753484	0	0	0	0	0.247317
1	0.924174	0.761197	0	0	0	0.116748	0
1	0.924174	0.776105	0	0	0	0	0
1	0.360003	0.791647	0	0	0	0	0
1	0.417998	0.813667	0	0	0	0	0
1	0.947742	0.776105	0	0	0	0	0
1	0.924174	0.776105	0	0	0	0	0
1	0.947742	0.746875	0	0	0	0	0.240624
1	0.924174	0.791647	0	0	0	0	0
1	0.374911	0.791647	0	0	0	0	0
1	0.417998	0.813667	0	0	0	0	0
1	0.924174	0.791647	0	0	0	0	0
1	0.374911	0.791647	0	0	0	0	0
1	0.803169	0	0	0	0	0	0
1	0.947742	0.761197	0	0	0	0	0
1	0.947742	0.776105	0	0	0	0	0
1	0.947742	0.761197	0	0	0	0	0
1	0.902035	0.776105	0	0	0	0.109321	0
1	0.803169	0	0	0	0	0	0
1	0.947742	0.776105	0	0	0	0	0
1	0.947742	0.761197	0	0	0	0	0
1	0.803169	0	0	0	0	0	0
1	0.924174	0.791647	0	0	0	0	0
1	0.947742	0.746875	0	0	0	0.102041	0.240624
1	0.924174	0.776105	0	0	0	0	0
1	0.924174	0.776105	0	0	0	0	0
1	0.924174	0.776105	0	0	0	0	0
1	0.947742	0.746875	0	0	0	0.102041	0.237129
1	0.788057	0	0	0	0	0	0
1	0.947742	0.746875	0	0	0	0.102041	0.244152
1	0.924174	0.776105	0	0	0	0	0
1	0.902035	0.776105	0	0	0	0.12433	0
1	0.364905	0.791647	0	0	0	0	0
1	0.947742	0.761197	0	0	0	0	0
1	0.374911	0.791647	0	0	0	0	0
1	0.947742	0.746875	0	0	0	0.102041	0.233668
1	0.924174	0.776105	0	0	0	0	0
1	0.924174	0.776105	0	0	0	0	0
1	0.788057	0	0	0	0	0	0
1	0.924174	0.761197	0	0	0	0.116748	0
1	0.788057	0	0	0	0	0	0
1	0.947742	0.761197	0	0	0	0	0
1	0.974104	0.753484	0	0	0	0	0.243725
1	0.369874	0.791647	0	0	0	0	0
1	0.360003	0.791647	0	0	0	0	0
1	0.380018	0.791647	0	0	0	0	0
1	0.788057	0	0	0	0	0	0
1	0.924174	0.791647	0	0	0	0	0
1	0.788057	0	0	0	0	0	0
1	0.947742	0.776105	0	0	0	0	0
1	0.788057	0	0	0	0	0	0
1	0.947742	0.776105	0	0	0	0	0
1	0.924174	0.776105	0	0	0	0	0
1	0.788057	0	0	0	0	0	0
1	0.947742	0.776105	0	0	0	0	0
1	0.924174	0.761197	0	0	0	0.119258	0
1	0.360003	0.791647	0	0	0	0	0
1	0.369874	0.791647	0	0	0	0	0
1	0.924174	0.791647	0	0	0	0	0
1	0.924174	0.761197	0	0	0	0.116748	0
1	0.924174	0.776105	0	0	0	0.119258	0
1	0.947742	0.746875	0	0	0	0.102041	0.233668
1	0.369874	0.791647	0	0	0	0	0
1	0.924174	0.761197	0	0	0	0.116748	0
1	0.924174	0.761197	0	0	0	0.119258	0
1	0.788057	0	0	0	0	0	0
1	0.924174	0.761197	0	0	0	0	0
1	0.924174	0.761197	0	0	0	0	0
1	0.417998	0.813667	0	0	0	0	0
1	0.788057	0	0	0	0	0	0
1	0.788057	0	0	0	0	0	0
1	0.924174	0.791647	0	0	0	0	0
1	0.974104	0.76765	0	0	0	0	0.243725
1	0.974104	0.753484	0	0	0	0	0.243725
1	0.417998	0.813667	0	0	0	0	0
1	0.924174	0.761197	0	0	0	0.116748	0
1	0.947742	0.776105	0	0	0	0	0
1	0.417998	0.813667	0	0	0	0	0
1	0.369874	0.791647	0	0	0	0	0
1	0.374911	0.791647	0	0	0	0	0
1	0.924174	0.791647	0	0	0	0	0
1	0.947742	0.746875	0	0	0	0	0.237129
1	0.924174	0.791647	0	0	0	0	0
1	0.947742	0.761197	0	0	0	0	0
1	0.924174	0.761197	0	0	0	0.114256	0
1	0.374911	0.791647	0	0	0	0	0
1	0.364905	0.791647	0	0	0	0	0
1	0.902035	0.776105	0	0	0	0.11178	0
1	0.947742	0.761197	0	0	0	0	0
1	0.902035	0.776105	0	0	0	0.119258	0
1	0.924174	0.761197	0	0	0	0.116748	0
1	0.947742	0.761197	0	0	0	0	0
1	0.417998	0.813667	0	0	0	0	0
1	0.380018	0.791647	0	0	0	0	0
1	0.417998	0.813667	0	0	0	0	0
1	0.947742	0.776105	0	0	0	0	0
1	0.924174	0.791647	0	0	0	0	0
1	0.360003	0.791647	0	0	0	0	0
1	0.380018	0.791647	0	0	0	0	0
1	0.924174	0.761197	0	0	0	0.116748	0
1	0.788057	0	0	0	0	0	0
1	0.412354	0.813667	0	0	0	0	0
1	0.947742	0.761197	0	0	0	0	0
1	0.924174	0.761197	0	0	0	0.116748	0
1	0.417998	0.813667	0	0	0	0	0
1	0.924174	0.761197	0	0	0	0.116748	0
1	0.947742	0.776105	0	0	0	0	0
1	0.788057	0	0	0	0	0	0
1	0.924174	0.761197	0	0	0	0.119258	0
1	0.417998	0.813667	0	0	0	0	0
1	0.947742	0.761197	0	0	0	0	0
1	0.947742	0.776105	0	0	0	0	0
1	0.974104	0.753484	0	0	0	0	0.247317
1	0.924174	0.776105	0	0	0	0	0
1	0.947742	0.746875	0	0	0	0	0.240624
1	0.947742	0.746875	0	0	0	0	0.237129
1	0.803169	0	0	0	0	0	0
1	0.947742	0.776105	0	0	0	0	0
1	0.924174	0.761197	0	0	0	0.116748	0
1	0.924174	0.791647	0	0	0	0	0
1	0.947742	0.776105	0	0	0	0	0
1	0.924174	0.761197	0	0	0	0.114256	0
1	0.417998	0.813667	0	0	0	0	0
1	0.417998	0.813667	0	0	0	0	0
1	0.417998	0.813667	0	0	0	0	0
1	0.924174	0.761197	0	0	0	0.116748	0
1	0.788057	0	0	0	0	0	0
1	0.417998	0.813667	0	0	0	0	0
1	0.417998	0.813667	0	0	0	0	0
1	0.947742	0.746875	0	0	0	0	0.240624
1	0.924174	0.776105	0	0	0	0	0
1	0.947742	0.761197	0	0	0	0	0
1	0.417998	0.813667	0	0	0	0	0
1	0.788057	0	0	0	0	0	0
1	0.788057	0	0	0	0	0	0
1	0.924174	0.761197	0	0	0	0.116748	0
1	0.417998	0.813667	0	0	0	0	0
1	0.788057	0	0	0	0	0	0
1	0.947742	0.776105	0	0	0	0	0
1	0.417998	0.813667	0	0	0	0	0
1	0.902035	0.776105	0	0	0	0.126893	0
1	0.423729	0.813667	0	0	0	0	0
1	0.423729	0.813667	0	0	0	0	0
1	0.417998	0.813667	0	0	0	0	0
1	0.947742	0.761197	0	0	0	0	0
1	0.385198	0.791647	0	0	0	0	0
1	0.788057	0	0	0	0	0	0
1	0.924174	0.761197	0	0	0	0.116748	0
1	0.947742	0.776105	0	0	0	0	0
1	0.974104	0.753484	0	0	0	0	0.247317
1	0.369874	0.791647	0	0	0	0	0
1	0.947742	0.761197	0	0	0	0	0
1	0.947742	0.776105	0	0	0	0	0
1	0.417998	0.813667	0	0	0	0	0
1	0.924174	0.761197	0	0	0	0.116748	0
1	0.924174	0.791647	0	0	0	0	0
1	0.947742	0.776105	0	0	0	0	0
1	0.924174	0.791647	0	0	0	0	0
1	0.924174	0.791647	0	0	0	0	0
1	0.924174	0.791647	0	0	0	0	0
1	0.369874	0.791647	0	0	0	0	0
1	0.924174	0.776105	0	0	0	0	0
1	0.947742	0.746875	0	0	0	0.102041	0.233668
1	0.924174	0.776105	0	0	0	0	0
1	0.924174	0.776105	0	0	0	0	0
1	0.788057	0	0	0	0	0	0
1	0.902035	0.776105	0	0	0	0.116748	0
1	0.947742	0.746875	0	0	0	0	0.237129
1	0.947742	0.776105	0	0	0	0	0
1	0.924174	0.761197	0	0	0	0.114256	0
1	0.924174	0.776105	0	0	0	0	0
1	0.924174	0.761197	0	0	0	0.119258	0
1	0.924174	0.761197	0	0	0	0.116748	0
1	0.974104	0.76765	0	0	0	0.104879	0.247317
1	0.364905	0.791647	0	0	0	0	0
1	0.924174	0.791647	0	0	0	0	0
1	0.924174	0.761197	0	0	0	0	0
1	0.412354	0.813667	0	0	0	0	0
1	0.947742	0.776105	0	0	0	0	0
1	0.374911	0.791647	0	0	0	0	0
1	0.788057	0	0	0	0	0	0
1	0.947742	0.761197	0	0	0	0	0
1	0.924174	0.761197	0	0	0	0.116748	0
1	0.947742	0.761197	0	0	0	0	0
1	0.924174	0.761197	0	0	0	0.116748	0
1	0.924174	0.761197	0	0	0	0	0
1	0.924174	0.791647	0	0	0	0	0
1	0.788057	0	0	0	0	0	0
1	0.924174	0.776105	0	0	0	0	0
1	0.947742	0.746875	0	0	0	0	0.237129
1	0.947742	0.746875	0	0	0	0	0.237129
1	0.423729	0.813667	0	0	0	0	0
1	0.788057	0	0	0	0	0	0
1	0.417998	0.813667	0	0	0	0	0
1	0.947742	0.761197	0	0	0	0	0
1	0.902035	0.776105	0	0	0	0.104451	0
1	0.924174	0.761197	0	0	0	0.116748	0
1	0.417998	0.813667	0	0	0	0	0
1	0.924174	0.776105	0	0	0	0	0
1	0.947742	0.776105	0	0	0	0	0
1	0.947742	0.776105	0	0	0	0	0
1	0.369874	0.791647	0	0	0	0	0
1	0.947742	0.761197	0	0	0	0	0
1	0.947742	0.746875	0	0	0	0.102041	0.237129
1	0.417998	0.813667	0	0	0	0	0
1	0.423729	0.813667	0	0	0	0	0
1	0.417998	0.813667	0	0	0	0	0
1	0.924174	0.776105	0	0	0	0.119258	0
1	0.374911	0.791647	0	0	0	0	0
1	0.803169	0	0	0	0	0	0
1	0.974104	0.753484	0	0	0	0	0.243725
1	0.947742	0.776105	0	0	0	0	0
1	0.423729	0.813667	0	0	0	0	0
1	0.902035	0.776105	0	0	0	0.119258	0
1	0.364905	0.791647	0	0	0	0	0
1	0.412354	0.813667	0	0	0	0	0
1	0.947742	0.761197	0	0	0	0	0
1	0.355166	0.791647	0	0	0	0	0
1	0.417998	0.813667	0	0	0	0	0
1	0.369874	0.791647	0	0	0	0	0
1	0.924174	0.761197	0	0	0	0.116748	0
1	0.947742	0.761197	0	0	0	0	0
1	0.947742	0.746875	0	0	0	0.102041	0.244152
1	0.924174	0.761197	0	0	0	0.116748	0
1	0.788057	0	0	0	0	0	0
1	0.924174	0.761197	0	0	0	0	0
1	0.369874	0.791647	0	0	0	0	0
1	0.788057	0	0	0	0	0	0
1	0.423729	0.813667	0	0	0	0	0
1	0.924174	0.776105	0	0	0	0.121785	0
1	0.924174	0.761197	0	0	0	0.114256	0
1	0.947742	0.776105	0	0	0	0	0
1	0.947742	0.746875	0	0	0	0.102041	0.233668
1	0.924174	0.776105	0	0	0	0	0
1	0.364905	0.791647	0	0	0	0	0
1	0.924174	0.761197	0	0	0	0.119258	0
1	0.924174	0.776105	0	0	0	0.119258	0
1	0.369874	0.791647	0	0	0	0	0
1	0.924174	0.776105	0	0	0	0	0
1	0.788057	0	0	0	0	0	0
1	0.924174	0.791647	0	0	0	0	0
1	0.924174	0.761197	0	0	0	0.119258	0
1	0.788057	0	0	0	0	0	0
1	0.423729	0.813667	0	0	0	0	0
1	0.423729	0.813667	0	0	0	0	0
1	0.947742	0.776105	0	0	0	0	0
1	0.947742	0.776105	0	0	0	0	0
1	0.947742	0.746875	0	0	0	0.102041	0.240624
1	0.947742	0.776105	0	0	0	0	0
1	0.924174	0.776105	0	0	0	0	0
1	0.417998	0.813667	0	0	0	0	0
1	0.924174	0.776105	0	0	0	0.116748	0
1	0.374911	0.791647	0	0	0	0	0
1	0.924174	0.761197	0	0	0	0.119258	0
1	0.788057	0	0	0	0	0	0
1	0.924174	0.761197	0	0	0	0.116748	0
1	0.924174	0.761197	0	0	0	0.116748	0
1	0.902035	0.776105	0	0	0	0.121785	0
1	0.924174	0.776105	0	0	0	0	0
1	0.924174	0.761197	0	0	0	0.116748	0
1	0.924174	0.776105	0	0	0	0	0
1	0.902035	0.776105	0	0	0	0.121785	0
1	0.924174	0.791647	0	0	0	0	0
1	0.803169	0	0	0	0	0	0
1	0.374911	0.791647	0	0	0	0	0
1	0.974104	0.76765	0	0	0	0	0.240168
1	0.417998	0.813667	0	0	0	0	0
1	0.947742	0.746875	0	0	0	0	0.233668
1	0.947742	0.776105	0	0	0	0	0
1	0.417998	0.813667	0	0	0	0	0
1	0.947742	0.761197	0	0	0	0	0
1	0.423729	0.813667	0	0	0	0	0
1	0.364905	0.791647	0	0	0	0	0
1	0.947742	0.776105	0	0	0	0	0
1	0.788057	0	0	0	0	0	0
1	0.369874	0.791647	0	0	0	0	0
1	0.364905	0.791647	0	0	0	0	0
1	0.417998	0.813667	0	0	0	0	0
1	0.374911	0.791647	0	0	0	0	0
1	0.947742	0.746875	0	0	0	0.102041	0.233668
1	0.924174	0.761197	0	0	0	0.119258	0
1	0.947742	0.746875	0	0	0	0.102041	0.233668
1	0.924174	0.761197	0	0	0	0.114256	0
1	0.924174	0.791647	0	0	0	0	0
1	0.947742	0.776105	0	0	0	0	0
1	0.385198	0.791647	0	0	0	0	0
1	0.947742	0.761197	0	0	0	0	0
1	0.947742	0.746875	0	0	0	0.104451	0.237129
1	0.974104	0.76765	0	0	0	0	0.243725
1	0.360003	0.791647	0	0	0	0	0
1	0.417998	0.813667	0	0	0	0	0
1	0.423729	0.813667	0	0	0	0	0
1	0.374911	0.791647	0	0	0	0	0
1	0.417998	0.813667	0	0	0	0	0
1	0.947742	0.746875	0	0	0	0.104451	0.240624
1	0.947742	0.761197	0	0	0	0	0
1	0.947742	0.761197	0	0	0	0	0
1	0.974104	0.753484	0	0	0	0.104879	0.250944
1	0.974104	0.76765	0	0	0	0	0.240168
1	0.788057	0	0	0	0	0	0
1	0.924174	0.791647	0	0	0	0	0
1	0.947742	0.746875	0	0	0	0	0.233668
1	0.924174	0.761197	0	0	0	0.116748	0
1	0.947742	0.746875	0	0	0	0	0.237129
1	0.924174	0.761197	0	0	0	0.114256	0
1	0.947742	0.776105	0	0	0	0	0
1	0.374911	0.791647	0	0	0	0	0
1	0.902035	0.776105	0	0	0	0.12433	0
1	0.974104	0.76765	0	0	0	0.104879	0.243725
1	0.902035	0.776105	0	0	0	0.114256	0
1	0.947742	0.776105	0	0	0	0	0
1	0.924174	0.776105	0	0	0	0	0
1	0.788057	0	0	0	0	0	0
1	0.417998	0.813667	0	0	0	0	0
1	0.947742	0.746875	0	0	0	0.102041	0.237129
1	0.380018	0.791647	0	0	0	0	0
1	0.924174	0.791647	0	0	0	0	0
1	0.924174	0.776105	0	0	0	0	0
1	0.924174	0.761197	0	0	0	0	0
1	0.924174	0.761197	0	0	0	0.114256	0
1	0.947742	0.746875	0	0	0	0	0.240624
1	0.947742	0.761197	0	0	0	0	0
1	0.380018	0.791647	0	0	0	0	0
1	0.924174	0.761197	0	0	0	0.116748	0
1	0.902035	0.776105	0	0	0	0.119258	0
1	0.417998	0.813667	0	0	0	0	0
1	0.417998	0.813667	0	0	0	0	0
1	0.380018	0.791647	0	0	0	0	0
1	0.947742	0.776105	0	0	0	0	0
1	0.417998	0.813667	0	0	0	0	0
1	0.947742	0.776105	0	0	0	0	0
1	0.364905	0.791647	0	0	0	0	0
1	0.803169	0	0	0	0	0	0
1	0.947742	0.776105	0	0	0	0	0
1	0.924174	0.791647	0	0	0	0	0
1	0.902035	0.776105	0	0	0	0.114256	0
1	0.947742	0.746875	0	0	0	0.102041	0.237129
1	0.788057	0	0	0	0	0	0
1	0.947742	0.746875	0	0	0	0.102041	0.237129
1	0.803169	0	0	0	0	0	0
1	0.803169	0	0	0	0	0	0
1	0.788057	0	0	0	0	0	0
1	0.974104	0.76765	0	0	0	0.104879	0.243725
1	0.924174	0.791647	0	0	0	0	0
1	0.947742	0.776105	0	0	0	0	0
1	0.902035	0.776105	0	0	0	0.121785	0
1	0.947742	0.761197	0	0	0	0	0
1	0.974104	0.76765	0	0	0	0	0.243725
1	0.947742	0.776105	0	0	0	0	0
1	0.924174	0.791647	0	0	0	0	0
1	0.924174	0.776105	0	0	0	0	0
1	0.947742	0.761197	0	0	0	0	0
1	0.924174	0.776105	0	0	0	0	0
1	0.788057	0	0	0	0	0	0
1	0.947742	0.746875	0	0	0	0	0.233668
1	0.924174	0.761197	0	0	0	0.116748	0
1	0.947742	0.746875	0	0	0	0.102041	0.237129
1	0.369874	0.791647	0	0	0	0	0
1	0.947742	0.761197	0	0	0	0	0
1	0.417998	0.813667	0	0	0	0	0
1	0.924174	0.776105	0	0	0	0	0
1	0.417998	0.813667	0	0	0	0	0
1	0.924174	0.761197	0	0	0	0.119258	0
1	0.788057	0	0	0	0	0	0
1	0.924174	0.761197	0	0	0	0	0
1	0.417998	0.813667	0	0	0	0	0
1	0.974104	0.76765	0	0	0	0	0.240168
1	0.374911	0.791647	0	0	0	0	0
1	0.947742	0.761197	0	0	0	0	0
1	0.417998	0.813667	0	0	0	0	0
1	0.374911	0.791647	0	0	0	0	0
1	0.947742	0.776105	0	0	0	0	0
1	0.924174	0.761197	0	0	0	0.116748	0
1	0.788057	0	0	0	0	0	0
1	0.947742	0.776105	0	0	0	0	0
1	0.924174	0.791647	0	0	0	0	0
1	0.924174	0.791647	0	0	0	0	0
1	0.803169	0	0	0	0	0	0
1	0.788057	0	0	0	0	0	0
1	0.788057	0	0	0	0	0	0
1	0.947742	0.776105	0	0	0	0	0
1	0.947742	0.776105	0	0	0	0	0
1	0.924174	0.761197	0	0	0	0.116748	0
1	0.947742	0.776105	0	0	0	0	0
1	0.924174	0.761197	0	0	0	0.114256	0
1	0.924174	0.791647	0	0	0	0	0
1	0.947742	0.746875	0	0	0	0.102041	0.237129
1	0.947742	0.776105	0	0	0	0	0
1	0.924174	0.791647	0	0	0	0	0
1	0.924174	0.761197	0	0	0	0.116748	0
1	0.412354	0.813667	0	0	0	0	0
1	0.924174	0.776105	0	0	0	0	0
1	0.947742	0.746875	0	0	0	0.102041	0.240624
1	0.947742	0.776105	0	0	0	0	0
1	0.924174	0.776105	0	0	0	0	0
1	0.369874	0.791647	0	0	0	0	0
1	0.924174	0.761197	0	0	0	0.119258	0
1	0.423729	0.813667	0	0	0	0	0
1	0.788057	0	0	0	0	0	0
1	0.947742	0.776105	0	0	0	0	0
1	0.974104	0.76765	0	0	0	0	0.247317
1	0.364905	0.791647	0	0	0	0	0
1	0.417998	0.813667	0	0	0	0	0
1	0.924174	0.761197	0	0	0	0.114256	0
1	0.369874	0.791647	0	0	0	0	0
1	0.947742	0.761197	0	0	0	0	0
1	0.417998	0.813667	0	0	0	0	0
1	0.417998	0.813667	0	0	0	0	0
1	0.974104	0.76765	0	0	0	0	0.247317
1	0.924174	0.761197	0	0	0	0.119258	0
1	0.947742	0.776105	0	0	0	0	0
1	0.902035	0.776105	0	0	0	0.114256	0
1	0.947742	0.746875	0	0	0	0.104451	0.237129
1	0.924174	0.776105	0	0	0	0	0
1	0.924174	0.776105	0	0	0	0	0
1	0.947742	0.776105	0	0	0	0	0
1	0.423729	0.813667	0	0	0	0	0
1	0.374911	0.791647	0	0	0	0	0
1	0.788057	0	0	0	0	0	0
1	0.924174	0.776105	0	0	0	0	0
1	0.924174	0.776105	0	0	0	0	0
1	0.902035	0.776105	0	0	0	0.116748	0
1	0.417998	0.813667	0	0	0	0	0
1	0.924174	0.776105	0	0	0	0	0
1	0.924174	0.761197	0	0	0	0.116748	0
1	0.947742	0.776105	0	0	0	0	0
1	0.788057	0	0	0	0	0	0
1	0.788057	0	0	0	0	0	0
1	0.364905	0.791647	0	0	0	0	0
1	0.947742	0.746875	0	0	0	0.102041	0.244152
1	0.924174	0.776105	0	0	0	0	0
1	0.924174	0.761197	0	0	0	0	0
1	0.974104	0.76765	0	0	0	0	0.243725
1	0.924174	0.761197	0	0	0	0.116748	0
1	0.924174	0.791647	0	0	0	0	0
1	0.924174	0.761197	0	0	0	0.116748	0
1	0.374911	0.791647	0	0	0	0	0
1	0.412354	0.813667	0	0	0	0	0
1	0.947742	0.746875	0	0	0	0.102041	0.237129
1	0.924174	0.761197	0	0	0	0	0
1	0.788057	0	0	0	0	0	0
1	0.360003	0.791647	0	0	0	0	0
1	0.788057	0	0	0	0	0	0
1	0.902035	0.776105	0	0	0	0.116748	0
1	0.924174	0.776105	0	0	0	0	0
1	0.924174	0.761197	0	0	0	0.116748	0
1	0.924174	0.761197	0	0	0	0.114256	0
1	0.947742	0.761197	0	0	0	0	0
1	0.360003	0.791647	0	0	0	0	0
1	0.803169	0	0	0	0	0	0
1	0.412354	0.813667	0	0	0	0	0
1	0.360003	0.791647	0	0	0	0	0
1	0.374911	0.791647	0	0	0	0	0
1	0.788057	0	0	0	0	0	0
1	0.924174	0.761197	0	0	0	0.119258	0
1	0.924174	0.761197	0	0	0	0.116748	0
1	0.788057	0	0	0	0	0	0
1	0.417998	0.813667	0	0	0	0	0
1	0.902035	0.776105	0	0	0	0.119258	0
1	0.788057	0	0	0	0	0	0
1	0.417998	0.813667	0	0	0	0	0
1	0.902035	0.776105	0	0	0	0.106878	0
1	0.417998	0.813667	0	0	0	0	0
1	0.974104	0.76765	0	0	0	0.104879	0.247317
1	0.947742	0.761197	0	0	0	0	0
1	0.924174	0.791647	0	0	0	0	0
1	0.385198	0.791647	0	0	0	0	0
1	0.390453	0.791647	0	0	0	0	0
1	0.947742	0.776105	0	0	0	0	0
1	0.412354	0.813667	0	0	0	0	0
1	0.924174	0.761197	0	0	0	0.119258	0
1	0.788057	0	0	0	0	0	0
1	0.924174	0.776105	0	0	0	0	0
1	0.360003	0.791647	0	0	0	0	0
1	0.947742	0.776105	0	0	0	0	0
1	0.924174	0.776105	0	0	0	0	0
1	0.364905	0.791647	0	0	0	0	0
1	0.924174	0.761197	0	0	0	0.116748	0
1	0.924174	0.776105	0	0	0	0	0
1	0.947742	0.746875	0	0	0	0.102041	0.244152
1	0.924174	0.761197	0	0	0	0.116748	0
1	0.417998	0.813667	0	0	0	0	0
1	0.974104	0.753484	0	0	0	0	0.247317
1	0.417998	0.813667	0	0	0	0	0
1	0.788057	0	0	0	0	0	0
1	0.947742	0.776105	0	0	0	0	0
1	0.947742	0.761197	0	0	0	0	0
1	0.902035	0.776105	0	0	0	0.114256	0
1	0.947742	0.776105	0	0	0	0	0
1	0.947742	0.746875	0	0	0	0.102041	0.233668
1	0.924174	0.776105	0	0	0	0.116748	0
1	0.788057	0	0	0	0	0	0
1	0.788057	0	0	0	0	0	0
1	0.947742	0.761197	0	0	0	0	0
1	0.788057	0	0	0	0	0	0
1	0.947742	0.761197	0	0	0	0	0
1	0.947742	0.776105	0	0	0	0	0
1	0.947742	0.761197	0	0	0	0	0
1	0.924174	0.791647	0	0	0	0	0
1	0.423729	0.813667	0	0	0	0	0
1	0.947742	0.776105	0	0	0	0	0
1	0.924174	0.776105	0	0	0	0	0
1	0.924174	0.761197	0	0	0	0.114256	0
1	0.924174	0.761197	0	0	0	0.119258	0
1	0.369874	0.791647	0	0	0	0	0
1	0.902035	0.776105	0	0	0	0.116748	0
1	0.924174	0.776105	0	0	0	0.116748	0
1	0.417998	0.813667	0	0	0	0	0
1	0.924174	0.776105	0	0	0	0	0
1	0.788057	0	0	0	0	0	0
1	0.902035	0.776105	0	0	0	0.121785	0
1	0.803169	0	0	0	0	0	0
1	0.803169	0	0	0	0	0	0
1	0.924174	0.761197	0	0	0	0.119258	0
1	0.924174	0.761197	0	0	0	0.119258	0
1	0.947742	0.761197	0	0	0	0	0
1	0.417998	0.813667	0	0	0	0	0
1	0.924174	0.761197	0	0	0	0.114256	0
1	0.417998	0.813667	0	0	0	0	0
1	0.924174	0.761197	0	0	0	0	0
1	0.947742	0.776105	0	0	0	0	0
1	0.947742	0.746875	0	0	0	0	0.233668
1	0.924174	0.761197	0	0	0	0.116748	0
1	0.974104	0.76765	0	0	0	0	0.243725
1	0.974104	0.76765	0	0	0	0.104879	0.240168
1	0.924174	0.791647	0	0	0	0	0
1	0.947742	0.746875	0	0	0	0	0.237129
1	0.902035	0.776105	0	0	0	0.12433	0
1	0.374911	0.791647	0	0	0	0	0
1	0.974104	0.76765	0	0	0	0.104879	0.240168
1	0.788057	0	0	0	0	0	0
1	0.974104	0.76765	0	0	0	0.104879	0.243725
1	0.417998	0.813667	0	0	0	0	0
1	0.947742	0.776105	0	0	0	0	0
1	0.924174	0.761197	0	0	0	0.116748	0
1	0.788057	0	0	0	0	0	0
1	0.947742	0.746875	0	0	0	0.102041	0.233668
1	0.947742	0.761197	0	0	0	0	0
1	0.417998	0.813667	0	0	0	0	0
1	0.360003	0.791647	0	0	0	0	0
1	0.924174	0.776105	0	0	0	0	0
1	0.417998	0.813667	0	0	0	0	0
1	0.924174	0.761197	0	0	0	0.114256	0
1	0.788057	0	0	0	0	0	0
1	0.385198	0.791647	0	0	0	0	0
1	0.417998	0.813667	0	0	0	0	0
1	0.947742	0.776105	0	0	0	0	0
1	0.947742	0.776105	0	0	0	0	0
1	0.947742	0.746875	0	0	0	0	0.233668
1	0.803169	0	0	0	0	0	0
1	0.788057	0	0	0	0	0	0
1	0.924174	0.761197	0	0	0	0.116748	0
1	0.788057	0	0	0	0	0	0
1	0.374911	0.791647	0	0	0	0	0
1	0.947742	0.761197	0	0	0	0	0
1	0.947742	0.761197	0	0	0	0	0
1	0.924174	0.776105	0	0	0	0	0
1	0.947742	0.776105	0	0	0	0	0
1	0.924174	0.776105	0	0	0	0	0
1	0.947742	0.776105	0	0	0	0	0
1	0.902035	0.776105	0	0	0	0.119258	0
1	0.924174	0.761197	0	0	0	0.116748	0
1	0.364905	0.791647	0	0	0	0	0
1	0.947742	0.776105	0	0	0	0	0
1	0.947742	0.761197	0	0	0	0	0
1	0.924174	0.761197	0	0	0	0	0
1	0.924174	0.761197	0	0	0	0.116748	0
1	0.417998	0.813667	0	0	0	0	0
1	0.924174	0.761197	0	0	0	0.116748	0
1	0.924174	0.791647	0	0	0	0	0
1	0.417998	0.813667	0	0	0	0	0
1	0.788057	0	0	0	0	0	0
1	0.788057	0	0	0	0	0	0
1	0.924174	0.776105	0	0	0	0.119258	0
1	0.924174	0.776105	0	0	0	0	0
1	0.803169	0	0	0	0	0	0
1	0.364905	0.791647	0	0	0	0	0
1	0.924174	0.776105	0	0	0	0	0
1	0.902035	0.776105	0	0	0	0.119258	0
1	0.947742	0.776105	0	0	0	0	0
1	0.924174	0.761197	0	0	0	0.114256	0
1	0.924174	0.761197	0	0	0	0.116748	0
1	0.374911	0.791647	0	0	0	0	0
1	0.369874	0.791647	0	0	0	0	0
1	0.924174	0.761197	0	0	0	0.119258	0
1	0.974104	0.753484	0	0	0	0.104879	0.247317
1	0.947742	0.776105	0	0	0	0	0
1	0.924174	0.791647	0	0	0	0	0
1	0.788057	0	0	0	0	0	0
1	0.947742	0.761197	0	0	0	0	0
1	0.947742	0.776105	0	0	0	0	0
1	0.924174	0.761197	0	0	0	0.116748	0
1	0.947742	0.776105	0	0	0	0	0
1	0.924174	0.791647	0	0	0	0	0
1	0.947742	0.776105	0	0	0	0	0
1	0.380018	0.791647	0	0	0	0	0
1	0.947742	0.746875	0	0	0	0.102041	0.240624
1	0.803169	0	0	0	0	0	0
1	0.924174	0.791647	0	0	0	0	0
1	0.974104	0.753484	0	0	0	0	0.243725
1	0.369874	0.791647	0	0	0	0	0
1	0.924174	0.761197	0	0	0	0.116748	0
1	0.924174	0.761197	0	0	0	0.114256	0
1	0.947742	0.746875	0	0	0	0	0.233668
1	0.974104	0.76765	0	0	0	0	0.243725
1	0.924174	0.761197	0	0	0	0.119258	0
1	0.947742	0.776105	0	0	0	0	0
1	0.924174	0.761197	0	0	0	0.114256	0
1	0.355166	0.791647	0	0	0	0	0
1	0.947742	0.776105	0	0	0	0	0
1	0.788057	0	0	0	0	0	0
1	0.369874	0.791647	0	0	0	0	0
1	0.788057	0	0	0	0	0	0
1	0.417998	0.813667	0	0	0	0	0
1	0.788057	0	0	0	0	0	0
1	0.417998	0.813667	0	0	0	0	0
1	0.924174	0.761197	0	0	0	0.116748	0
1	0.974104	0.76765	0	0	0	0.104879	0.247317
1	0.902035	0.776105	0	0	0	0.116748	0
1	0.788057	0	0	0	0	0	0
1	0.902035	0.776105	0	0	0	0.119258	0
1	0.947742	0.761197	0	0	0	0	0
1	0.902035	0.776105	0	0	0	0.116748	0
1	0.947742	0.761197	0	0	0	0	0
1	0.412354	0.813667	0	0	0	0	0
1	0.924174	0.761197	0	0	0	0.116748	0
1	0.369874	0.791647	0	0	0	0	0
1	0.902035	0.776105	0	0	0	0.121785	0
1	0.924174	0.776105	0	0	0	0	0
1	0.947742	0.776105	0	0	0	0	0
1	0.788057	0	0	0	0	0	0
1	0.924174	0.761197	0	0	0	0	0
1	0.974104	0.76765	0	0	0	0	0.240168
1	0.788057	0	0	0	0	0	0
1	0.924174	0.761197	0	0	0	0.116748	0
1	0.924174	0.761197	0	0	0	0	0
1	0.788057	0	0	0	0	0	0
1	0.423729	0.813667	0	0	0	0	0
1	0.788057	0	0	0	0	0	0
1	0.364905	0.791647	0	0	0	0	0
1	0.788057	0	0	0	0	0	0
1	0.374911	0.791647	0	0	0	0	0
1	0.374911	0.791647	0	0	0	0	0
1	0.924174	0.791647	0	0	0	0	0
1	0.947742	0.776105	0	0	0	0	0
1	0.947742	0.746875	0	0	0	0.102041	0.237129
1	0.924174	0.776105	0	0	0	0	0
1	0.924174	0.761197	0	0	0	0.116748	0
1	0.974104	0.753484	0	0	0	0	0.247317
1	0.924174	0.791647	0	0	0	0	0
1	0.924174	0.791647	0	0	0	0	0
1	0.423729	0.813667	0	0	0	0	0
1	0.360003	0.791647	0	0	0	0	0
1	0.947742	0.776105	0	0	0	0	0
1	0.360003	0.791647	0	0	0	0	0
1	0.924174	0.791647	0	0	0	0	0
1	0.788057	0	0	0	0	0	0
1	0.374911	0.791647	0	0	0	0	0
1	0.380018	0.791647	0	0	0	0	0
1	0.902035	0.776105	0	0	0	0.121785	0
1	0.924174	0.776105	0	0	0	0	0
1	0.947742	0.776105	0	0	0	0	0
1	0.924174	0.776105	0	0	0	0	0
1	0.788057	0	0	0	0	0	0
1	0.924174	0.761197	0	0	0	0.114256	0
1	0.947742	0.761197	0	0	0	0	0
1	0.417998	0.813667	0	0	0	0	0
1	0.924174	0.761197	0	0	0	0.119258	0
1	0.924174	0.776105	0	0	0	0	0
1	0.924174	0.761197	0	0	0	0.116748	0
1	0.417998	0.813667	0	0	0	0	0
1	0.360003	0.791647	0	0	0	0	0
1	0.902035	0.776105	0	0	0	0.119258	0
1	0.924174	0.791647	0	0	0	0	0
1	0.803169	0	0	0	0	0	0
1	0.385198	0.791647	0	0	0	0	0
1	0.947742	0.776105	0	0	0	0	0
1	0.417998	0.813667	0	0	0	0	0
1	0.788057	0	0	0	0	0	0
1	0.417998	0.813667	0	0	0	0	0
1	0.902035	0.776105	0	0	0	0.119258	0
1	0.947742	0.761197	0	0	0	0	0
1	0.947742	0.746875	0	0	0	0.102041	0.233668
1	0.902035	0.776105	0	0	0	0.121785	0
1	0.947742	0.761197	0	0	0	0	0
1	0.417998	0.813667	0	0	0	0	0
1	0.423729	0.813667	0	0	0	0	0
1	0.947742	0.761197	0	0	0	0	0
1	0.417998	0.813667	0	0	0	0	0
1	0.924174	0.761197	0	0	0	0	0
1	0.902035	0.776105	0	0	0	0.121785	0
1	0.947742	0.746875	0	0	0	0.102041	0.233668
1	0.788057	0	0	0	0	0	0
1	0.369874	0.791647	0	0	0	0	0
1	0.417998	0.813667	0	0	0	0	0
1	0.788057	0	0	0	0	0	0
1	0.947742	0.761197	0	0	0	0	0
1	0.803169	0	0	0	0	0	0
1	0.974104	0.76765	0	0	0	0	0.243725
1	0.947742	0.776105	0	0	0	0	0
1	0.924174	0.776105	0	0	0	0	0
1	0.947742	0.761197	0	0	0	0	0
1	0.374911	0.791647	0	0	0	0	0
1	0.947742	0.776105	0	0	0	0	0
1	0.947742	0.761197	0	0	0	0	0
1	0.947742	0.746875	0	0	0	0.104451	0.244152
1	0.374911	0.791647	0	0	0	0	0
1	0.412354	0.813667	0	0	0	0	0
1	0.924174	0.776105	0	0	0	0	0
1	0.924174	0.761197	0	0	0	0.114256	0
1	0.947742	0.761197	0	0	0	0	0
1	0.924174	0.761197	0	0	0	0.116748	0
1	0.902035	0.776105	0	0	0	0.11178	0
1	0.974104	0.76765	0	0	0	0.104879	0.247317
1	0.355166	0.791647	0	0	0	0	0
1	0.788057	0	0	0	0	0	0
1	0.924174	0.761197	0	0	0	0	0
1	0.924174	0.761197	0	0	0	0.114256	0
1	0.902035	0.776105	0	0	0	0.121785	0
1	0.947742	0.776105	0	0	0	0	0
1	0.947742	0.746875	0	0	0	0	0.237129
1	0.803169	0	0	0	0	0	0
1	0.924174	0.791647	0	0	0	0	0
1	0.924174	0.761197	0	0	0	0.116748	0
1	0.417998	0.813667	0	0	0	0	0
1	0.974104	0.753484	0	0	0	0	0.247317
1	0.788057	0	0	0	0	0	0
1	0.417998	0.813667	0	0	0	0	0
1	0.924174	0.761197	0	0	0	0.116748	0
1	0.924174	0.761197	0	0	0	0.116748	0
1	0.947742	0.746875	0	0	0	0	0.233668
1	0.947742	0.776105	0	0	0	0	0
1	0.924174	0.761197	0	0	0	0.116748	0
1	0.924174	0.791647	0	0	0	0	0
1	0.924174	0.776105	0	0	0	0	0
1	0.788057	0	0	0	0	0	0
1	0.947742	0.776105	0	0	0	0	0
1	0.924174	0.776105	0	0	0	0.116748	0
1	0.788057	0	0	0	0	0	0
1	0.947742	0.776105	0	0	0	0	0
1	0.947742	0.761197	0	0	0	0	0
1	0.374911	0.791647	0	0	0	0	0
1	0.974104	0.76765	0	0	0	0	0.240168
1	0.788057	0	0	0	0	0	0
1	0.803169	0	0	0	0	0	0
1	0.947742	0.776105	0	0	0	0	0
1	0.924174	0.776105	0	0	0	0.116748	0
1	0.902035	0.776105	0	0	0	0.121785	0
1	0.924174	0.776105	0	0	0	0	0
1	0.417998	0.813667	0	0	0	0	0
1	0.788057	0	0	0	0	0	0
1	0.788057	0	0	0	0	0	0
1	0.947742	0.746875	0	0	0	0.102041	0.240624
1	0.947742	0.746875	0	0	0	0.102041	0.233668
1	0.947742	0.776105	0	0	0	0	0
1	0.788057	0	0	0	0	0	0
1	0.369874	0.791647	0	0	0	0	0
1	0.974104	0.76765	0	0	0	0	0.247317
1	0.947742	0.761197	0	0	0	0	0
1	0.374911	0.791647	0	0	0	0	0
1	0.364905	0.791647	0	0	0	0	0
1	0.947742	0.746875	0	0	0	0.102041	0.233668
1	0.924174	0.761197	0	0	0	0.116748	0
1	0.947742	0.746875	0	0	0	0.102041	0.233668
1	0.974104	0.753484	0	0	0	0	0.247317
1	0.947742	0.761197	0	0	0	0	0
1	0.947742	0.776105	0	0	0	0	0
1	0.947742	0.776105	0	0	0	0	0
1	0.947742	0.761197	0	0	0	0	0
1	0.947742	0.761197	0	0	0	0	0
1	0.788057	0	0	0	0	0	0
1	0.360003	0.791647	0	0	0	0	0
1	0.788057	0	0	0	0	0	0
1	0.788057	0	0	0	0	0	0
1	0.364905	0.791647	0	0	0	0	0
1	0.423729	0.813667	0	0	0	0	0
1	0.947742	0.761197	0	0	0	0	0
1	0.924174	0.761197	0	0	0	0.116748	0
[truncated: 1 more rows]
