# Supplementary material for: Virtual brain twins for stimulation in epilepsy
Source: Research Square preprint supplement (doi:10.21203/rs.3.rs-4908955/v1), 2024-09-03
Supplement: Supplementary file 13 [file Patient2_TI_stimulation.xlsx]

## Sheet: Sheet1
Left-F1-lateral-prefrontal	Left-F1-mesial-prefrontal	Left-Middle-frontal-sulcus	Left-F1-lateral-premotor	Left-Orbito-frontal-cortex	Left-PreSMA	Left-SMA	Left-Temporal-pole
0.576684	0.0831165	1	0	0.68469	0	0	0
0.576684	0.0783886	1	0	0.696193	0.0951965	0	0
0	0	1	0	0.672537	0	0	0
0.378066	0	1	0	0	0	0	0
0.576684	0.0807453	1	0	0.696193	0	0	0
0	0	1	0	0.682715	0	0	0
0.609355	0	1	0	0.713947	0	0	0
0.585343	0	1	0	0.70805	0.0714038	0	0
0	0	1	0	0	0	0	0
0.383223	0	1	0	0	0	0	0
0.576684	0	1	0	0.696193	0.0737181	0	0
0.576684	0	1	0	0.70805	0.0691034	0	0
0.576684	0	1	0	0.70805	0.0714038	0	0
0.600271	0.0803877	1	0	0.713947	0.0901449	0	0
0.576684	0.0783886	1	0	0.70805	0	0	0
0.576684	0	1	0	0.696193	0.0691034	0	0
0.383223	0	1	0	0	0	0	0
0.585343	0.0737181	1	0	0.70805	0	0	0
0.591391	0.0876829	1	0	0.738652	0.0901449	0	0
0.576684	0.0807453	1	0	0.696193	0	0	0
0	0	1	0	0.672537	0	0	0
0	0	1	0	0	0	0	0
0	0	1	0	0.672537	0	0	0
0	0	1	0	0	0	0	0
0.609355	0	1	0	0.713947	0	0	0
0.600271	0.0732248	1	0	0.713947	0.0926223	0	0
0.576684	0	1	0	0.696193	0.0760463	0	0
0.609355	0	1	0	0.738652	0	0	0
0	0	1	0	0.682715	0	0	0
0.585343	0	1	0	0.70805	0.0691034	0	0
0.383223	0	1	0	0	0	0	0
0.594202	0.0645434	1	0	0.720283	0	0	0
0.576684	0	1	0	0.70805	0.0714038	0	0
0	0	1	0	0	0	0	0
0.576684	0	1	0	0.70805	0.0783886	0	0
0.603268	0	1	0	0.68469	0.0760463	0	0
0	0	1	0	0	0	0	0
0	0	1	0	0	0	0	0
0	0	1	0	0.682715	0	0	0
0.594202	0	1	0	0.70805	0.0760463	0	0
0.576684	0.0737181	1	0	0.696193	0.09275	0	0
0	0	1	0	0.672537	0	0	0
0.383223	0	1	0	0	0	0	0
0.576684	0.0807453	1	0	0.68469	0	0	0
0.600271	0	1	0	0.726106	0.0779856	0	0
0.383223	0	1	0	0	0	0	0
0	0	1	0	0.672537	0	0	0
0.600271	0	1	0	0.702151	0	0	0
0.591391	0.0828045	1	0	0.726106	0.0926223	0	0
0	0	1	0	0	0	0	0
0.568215	0.0760463	1	0	0.696193	0	0	0
0.576684	0	1	0	0.70805	0.0760463	0	0
0.609355	0.0661894	1	0	0.738652	0.075598	0	0
0	0	1	0	0	0	0	0
0	0	1	0	0	0	0	0
0.585343	0	1	0	0.696193	0.0714038	0	0
0	0	1	0	0	0	0	0
0	0	1	0	0	0	0	0
0.600271	0	1	0	0.690697	0	0	0
0	0	1	0	0	0	0	0
0	0	1	0	0.682715	0	0	0
0.585343	0	1	0	0.720283	0.0760463	0	0
0.568215	0.0760463	1	0	0.70805	0.0951965	0	0
0	0	1	0	0	0	0	0
0	0	1	0	0.682715	0	0	0
0.568215	0.0737181	1	0	0.696193	0	0	0
0.568215	0.0879032	1	0	0.68469	0.0951965	0	0
0.609355	0.0661894	1	0	0.738652	0	0	0
0.374043	0	1	0	0	0	0	0
0	0	1	0	0	0	0	0
0	0	1	0	0.682715	0	0	0
0.568215	0.0855024	1	0	0.68469	0.09275	0	0
0.378066	0	1	0	0	0	0	0
0	0	1	0	0	0	0	0
0	0	1	0	0.672537	0	0	0
0	0	1	0	0.682715	0	0	0
0.568215	0.0807453	1	0	0.68469	0.09275	0	0
0.585343	0.0645434	1	0	0.720283	0.0691034	0	0
0	0	1	0	0	0	0	0
0	0	1	0	0	0	0	0
0.576684	0.0714038	1	0	0.696193	0	0	0
0	0	1	0	0	0	0	0
0.568215	0.0807453	1	0	0.68469	0.100137	0	0
0.568215	0.0783886	1	0	0.68469	0	0	0
0.576684	0.0807453	1	0	0.696193	0.090319	0	0
0	0	1	0	0	0	0	0
0	0	1	0	0.672537	0	0	0
0.576684	0.0807453	1	0	0.696193	0	0	0
0	0	1	0	0	0	0	0
0.576684	0.0737181	1	0	0.696193	0	0	0
0.568215	0.0783886	1	0	0.696193	0.102631	0	0
0.568215	0.0760463	1	0	0.70805	0	0	0
0.585343	0	1	0	0.70805	0	0	0
0	0	1	0	0	0	0	0
0	0	1	0	0	0	0	0
0	0	1	0	0	0	0	0
0.383223	0	1	0	0	0	0	0
0.383223	0	1	0	0	0	0	0
0.600271	0.0708657	1	0	0.726106	0	0	0
0	0	1	0	0	0	0	0
0.576684	0	1	0	0.696193	0	0	0
0.609355	0.0779856	1	0	0.726106	0	0	0
0.609355	0	1	0	0.738652	0	0	0
0.374043	0	1	0	0	0	0	0
0.585343	0	1	0	0.70805	0.0691034	0	0
0	0	1	0	0	0	0	0
0	0	1	0	0	0	0	0
0.594202	0.0645434	1	0	0.70805	0	0	0
0	0	1	0	0	0	0	0
0.568215	0.090319	1	0	0.696193	0.0831165	0	0
0	0	1	0	0.682715	0	0	0
0.568215	0.0831165	1	0	0.68469	0.090319	0	0
0	0	1	0	0	0	0	0
0	0	1	0	0.672537	0	0	0
0.591391	0.0828045	1	0	0.738652	0.0901449	0	0
0.378066	0	1	0	0	0	0	0
0.369009	0	1	0	0	0	0	0
0.374043	0	1	0	0	0	0	0
0.585343	0	1	0	0.70805	0.0645434	0	0
0	0	1	0	0	0	0	0
0	0	1	0	0	0	0	0
0	0	1	0	0.682715	0	0	0
0.576684	0.0807453	1	0	0.696193	0.0855024	0	0
0.594202	0	1	0	0.70805	0	0	0
0	0	1	0	0	0	0	0
0.585343	0	1	0	0.70805	0.0737181	0	0
0.600271	0	1	0	0.713947	0.0803877	0	0
0	0	1	0	0	0	0	0
0.576684	0.0760463	1	0	0.696193	0	0	0
0.585343	0	1	0	0.70805	0.0668166	0	0
0.609355	0	1	0	0.690697	0	0	0
0	0	1	0	0	0	0	0
0.594202	0	1	0	0.696193	0.0737181	0	0
0	0	1	0	0	0	0	0
0	0	1	0	0	0	0	0
0.576684	0.0855024	1	0	0.696193	0.09275	0	0
0	0	1	0	0.682715	0	0	0
0.374043	0	1	0	0	0	0	0
0.576684	0.0783886	1	0	0.68469	0	0	0
0.609355	0	1	0	0.738652	0.0732248	0	0
0.603268	0	1	0	0.67352	0	0	0
0	0	1	0	0	0	0	0
0.594202	0.0783886	1	0	0.696193	0	0	0
0.576684	0.0783886	1	0	0.68469	0	0	0
0.576684	0.0807453	1	0	0.70805	0	0	0
0.591391	0.0828045	1	0	0.713947	0.0901449	0	0
0.374043	0	1	0	0	0	0	0
0.576684	0.0831165	1	0	0.67352	0.09275	0	0
0	0	1	0	0	0	0	0
0.609355	0	1	0	0.702151	0	0	0
0.585343	0	1	0	0.70805	0.0645434	0	0
0	0	1	0	0.672537	0	0	0
0	0	1	0	0.682715	0	0	0
0.585343	0	1	0	0.70805	0.0783886	0	0
0	0	1	0	0	0	0	0
0	0	1	0	0.682715	0	0	0
0	0	1	0	0	0	0	0
0.576684	0.0691034	1	0	0.70805	0	0	0
0.383223	0	1	0	0	0	0	0
0.618653	0	1	0	0.713947	0	0	0
0	0	1	0	0.672537	0	0	0
0.374043	0	1	0	0	0	0	0
0	0	1	0	0	0	0	0
0	0	1	0	0.682715	0	0	0
0.383223	0	1	0	0	0	0	0
0	0	1	0	0.682715	0	0	0
0.600271	0.0732248	1	0	0.738652	0	0	0
0.600271	0	1	0	0.702151	0	0	0
0.383223	0	1	0	0	0	0	0
0.383223	0	1	0	0	0	0	0
0.576684	0.0783886	1	0	0.68469	0.09275	0	0
0.600271	0.0828045	1	0	0.713947	0.0901449	0	0
0	0	1	0	0	0	0	0
0.600271	0	1	0	0.726106	0.0732248	0	0
0.374043	0	1	0	0	0	0	0
0.594202	0	1	0	0.68469	0	0	0
0.600271	0	1	0	0.702151	0	0	0
0.576684	0.0760463	1	0	0.68469	0	0	0
0.553501	0.074077	1	0	0.678164	0	0	0
0.585343	0	1	0	0.70805	0.0737181	0	0
0	0	1	0	0	0	0	0
0	0	1	0	0	0	0	0
0	0	1	0	0	0	0	0
0.576684	0.0714038	1	0	0.68469	0	0	0
0.600271	0.0876829	1	0	0.713947	0.0876829	0	0
0.585343	0	1	0	0.696193	0.0714038	0	0
0.609355	0	1	0	0.713947	0	0	0
0	0	1	0	0	0	0	0
0.594202	0	1	0	0.70805	0	0	0
0	0	1	0	0	0	0	0
0.568215	0.0783886	1	0	0.68469	0	0	0
0.576684	0.0760463	1	0	0.696193	0	0	0
0.585343	0	1	0	0.70805	0.0645434	0	0
0.585343	0.0760463	1	0	0.70805	0.0691034	0	0
0	0	1	0	0	0	0	0
0.559929	0.0951965	1	0	0.696193	0.0879032	0	0
0.585343	0	1	0	0.696193	0.0737181	0	0
0.383223	0	1	0	0	0	0	0
0.568215	0.0807453	1	0	0.696193	0.090319	0	0
0.576684	0.0807453	1	0	0.696193	0.0855024	0	0
0.383223	0	1	0	0	0	0	0
0.591391	0.0828045	1	0	0.713947	0.0828045	0	0
0	0	1	0	0.672537	0	0	0
0.609355	0	1	0	0.713947	0	0	0
0.585343	0	1	0	0.70805	0.0691034	0	0
0.600271	0.0828045	1	0	0.713947	0.0852362	0	0
0.576684	0.0807453	1	0	0.70805	0	0	0
0.576684	0.0737181	1	0	0.70805	0	0	0
0	0	1	0	0	0	0	0
0.576684	0	1	0	0.70805	0.0760463	0	0
0	0	1	0	0	0	0	0
0	0	1	0	0	0	0	0
0	0	1	0	0.672537	0	0	0
0	0	1	0	0.672537	0	0	0
0.576684	0.0760463	1	0	0.68469	0	0	0
0	0	1	0	0	0	0	0
0.576684	0.09275	1	0	0.68469	0.0855024	0	0
0.568215	0.09275	1	0	0.696193	0.0783886	0	0
0.576684	0	1	0	0.696193	0.0783886	0	0
0	0	1	0	0	0	0	0
0.585343	0.0737181	1	0	0.70805	0.0737181	0	0
0.609355	0	1	0	0.679565	0	0	0
0	0	1	0	0	0	0	0
0	0	1	0	0	0	0	0
0.568215	0.0855024	1	0	0.68469	0.0951965	0	0
0	0	1	0	0	0	0	0
0	0	1	0	0.682715	0	0	0
0.576684	0.0783886	1	0	0.70805	0	0	0
0.576684	0.0807453	1	0	0.696193	0.090319	0	0
0.374043	0	1	0	0	0	0	0
0	0	1	0	0	0	0	0
0	0	1	0	0	0	0	0
0.585343	0.0645434	1	0	0.696193	0	0	0
0.576684	0.0831165	1	0	0.70805	0.09275	0	0
0.594202	0.0668166	1	0	0.696193	0	0	0
0.383223	0	1	0	0	0	0	0
0	0	1	0	0.682715	0	0	0
0.600271	0	1	0	0.726106	0.0803877	0	0
0.568215	0.0760463	1	0	0.696193	0.09275	0	0
0	0	1	0	0	0	0	0
0.576684	0.0714038	1	0	0.68469	0	0	0
0	0	1	0	0.672537	0	0	0
0.374043	0	1	0	0	0	0	0
0.374043	0	1	0	0	0	0	0
0	0	1	0	0	0	0	0
0	0	1	0	0	0	0	0
0.585343	0	1	0	0.70805	0.0645434	0	0
0.600271	0	1	0	0.702151	0	0	0
0.576684	0.0831165	1	0	0.68469	0.090319	0	0
0.568215	0.0760463	1	0	0.696193	0	0	0
0.585343	0	1	0	0.70805	0.0737181	0	0
0	0	1	0	0	0	0	0
0.591391	0.0779856	1	0	0.738652	0.0976242	0	0
0	0	1	0	0.682715	0	0	0
0.600271	0	1	0	0.726106	0.0732248	0	0
0	0	1	0	0	0	0	0
0.594202	0.0645434	1	0	0.70805	0.0760463	0	0
0.383223	0	1	0	0	0	0	0
0.600271	0	1	0	0.726106	0.0779856	0	0
0.585343	0	1	0	0.70805	0.0691034	0	0
0.369009	0	1	0	0	0	0	0
0.585343	0.0783886	1	0	0.68469	0	0	0
0.594202	0	1	0	0.70805	0	0	0
0.600271	0.0803877	1	0	0.726106	0	0	0
0	0	1	0	0	0	0	0
0	0	1	0	0.672537	0	0	0
0.576684	0.0855024	1	0	0.696193	0.09275	0	0
0.369009	0	1	0	0	0	0	0
0.585343	0	1	0	0.70805	0.0737181	0	0
0.568215	0.090319	1	0	0.696193	0.0855024	0	0
0	0	1	0	0.682715	0	0	0
0.561751	0.0718091	1	0	0.666959	0	0	0
0	0	1	0	0.682715	0	0	0
0.585343	0	1	0	0.70805	0.0737181	0	0
0	0	1	0	0.672537	0	0	0
0.576684	0.0783886	1	0	0.68469	0	0	0
0.591391	0.0803877	1	0	0.726106	0.0876829	0	0
0.600271	0.0828045	1	0	0.726106	0	0	0
0	0	1	0	0	0	0	0
0.369009	0	1	0	0	0	0	0
0	0	1	0	0	0	0	0
0	0	1	0	0	0	0	0
0	0	1	0	0	0	0	0
0	0	1	0	0.682715	0	0	0
0.568215	0.0831165	1	0	0.67352	0	0	0
0.576684	0.0831165	1	0	0.70805	0	0	0
0	0	1	0	0.672537	0	0	0
0.600271	0	1	0	0.726106	0.0732248	0	0
0.576684	0.0783886	1	0	0.67352	0	0	0
0	0	1	0	0	0	0	0
0	0	1	0	0	0	0	0
0.600271	0	1	0	0.738652	0.0803877	0	0
0.585343	0.0714038	1	0	0.70805	0	0	0
0.609355	0	1	0	0.726106	0.075598	0	0
0.568215	0.0760463	1	0	0.696193	0.09275	0	0
0	0	1	0	0	0	0	0
0	0	1	0	0	0	0	0
0	0	1	0	0.682715	0	0	0
0.576684	0.0714038	1	0	0.68469	0	0	0
0.378066	0	1	0	0	0	0	0
0	0	1	0	0.672537	0	0	0
0.585343	0	1	0	0.696193	0.0783886	0	0
0.594202	0	1	0	0.720283	0	0	0
0	0	1	0	0.682715	0	0	0
0.600271	0	1	0	0.713947	0.0732248	0	0
0.576684	0.0855024	1	0	0.696193	0.09275	0	0
0	0	1	0	0.672537	0	0	0
0	0	1	0	0	0	0	0
0.594202	0	1	0	0.720283	0	0	0
0.585343	0.0645434	1	0	0.70805	0.0807453	0	0
0.585343	0	1	0	0.70805	0.0668166	0	0
0.576684	0.0831165	1	0	0.68469	0	0	0
0.585343	0	1	0	0.720283	0.0783886	0	0
0.576684	0.0737181	1	0	0.696193	0	0	0
0	0	1	0	0.672537	0	0	0
0.609355	0.0732248	1	0	0.713947	0	0	0
0.378066	0	1	0	0	0	0	0
0	0	1	0	0.682715	0	0	0
0.369009	0	1	0	0	0	0	0
0.585343	0	1	0	0.696193	0.0668166	0	0
0	0	1	0	0	0	0	0
0	0	1	0	0	0	0	0
0.374043	0	1	0	0	0	0	0
0	0	1	0	0	0	0	0
0	0	1	0	0	0	0	0
0	0	1	0	0	0	0	0
0.609355	0.0779856	1	0	0.726106	0	0	0
0	0	1	0	0	0	0	0
0.585343	0	1	0	0.70805	0.0783886	0	0
0	0	1	0	0	0	0	0
0	0	1	0	0	0	0	0
0.576684	0.0831165	1	0	0.696193	0.0831165	0	0
0	0	1	0	0.672537	0	0	0
0	0	1	0	0.672537	0	0	0
0	0	1	0	0.682715	0	0	0
0	0	1	0	0.682715	0	0	0
0	0	1	0	0	0	0	0
0.568215	0.0807453	1	0	0.696193	0.09275	0	0
0	0	1	0	0.672537	0	0	0
0	0	1	0	0.682715	0	0	0
0	0	1	0	0.672537	0	0	0
0.585343	0.0737181	1	0	0.720283	0.0807453	0	0
0.369009	0	1	0	0	0	0	0
0	0	1	0	0	0	0	0
0	0	1	0	0	0	0	0
0.374043	0	1	0	0	0	0	0
0	0	1	0	0.672537	0	0	0
0.609355	0.0661894	1	0	0.738652	0	0	0
0	0	1	0	0.672537	0	0	0
0	0	1	0	0.672537	0	0	0
0	0	1	0	0	0	0	0
0	0	1	0	0	0	0	0
0.369009	0	1	0	0	0	0	0
0	0	1	0	0	0	0	0
0.576684	0.0691034	1	0	0.70805	0	0	0
0.369009	0	1	0	0	0	0	0
0.594202	0	1	0	0.70805	0.0807453	0	0
0.576684	0	1	0	0.696193	0.0714038	0	0
0	0	1	0	0	0	0	0
0.383223	0	1	0	0	0	0	0
0	0	1	0	0	0	0	0
0	0	1	0	0.672537	0	0	0
0.561751	0.0763587	1	0	0.666959	0	0	0
0.594202	0.0691034	1	0	0.720283	0	0	0
0	0	1	0	0	0	0	0
0.374043	0	1	0	0	0	0	0
0.591391	0.0852362	1	0	0.738652	0.0951153	0	0
0.609355	0	1	0	0.702151	0	0	0
0.591391	0.0779856	1	0	0.751608	0.0951153	0	0
0.568215	0.0831165	1	0	0.68469	0	0	0
0	0	1	0	0	0	0	0
0	0	1	0	0.682715	0	0	0
0	0	1	0	0	0	0	0
0	0	1	0	0	0	0	0
0.576684	0.0783886	1	0	0.70805	0	0	0
0.576684	0.0783886	1	0	0.696193	0.0831165	0	0
0.591391	0.0852362	1	0	0.738652	0.0876829	0	0
0.568215	0.0760463	1	0	0.696193	0	0	0
0.609355	0	1	0	0.702151	0	0	0
0	0	1	0	0.682715	0	0	0
0.576684	0.0783886	1	0	0.70805	0	0	0
0.374043	0	1	0	0	0	0	0
0	0	1	0	0	0	0	0
0.591391	0.0926223	1	0	0.738652	0.0926223	0	0
0	0	1	0	0	0	0	0
0.576684	0.0831165	1	0	0.68469	0	0	0
0.374043	0	1	0	0	0	0	0
0.609355	0.0685206	1	0	0.738652	0	0	0
0.576684	0.0807453	1	0	0.696193	0.09275	0	0
0.374043	0	1	0	0	0	0	0
0.585343	0.0760463	1	0	0.696193	0	0	0
0	0	1	0	0	0	0	0
0	0	1	0	0	0	0	0
0	0	1	0	0	0	0	0
0	0	1	0	0	0	0	0
0.576684	0.0831165	1	0	0.696193	0	0	0
0	0	1	0	0	0	0	0
0.374043	0	1	0	0	0	0	0
0.594202	0	1	0	0.70805	0	0	0
0	0	1	0	0.682715	0	0	0
0	0	1	0	0.672537	0	0	0
0.374043	0	1	0	0	0	0	0
0	0	1	0	0.672537	0	0	0
0.374043	0	1	0	0	0	0	0
0	0	1	0	0	0	0	0
0.609355	0	1	0	0.726106	0.0779856	0	0
0.600271	0.0685206	1	0	0.726106	0	0	0
0.374043	0	1	0	0	0	0	0
0.594202	0.0645434	1	0	0.720283	0	0	0
0.561751	0.0763587	1	0	0.678164	0	0	0
0.591391	0.0779856	1	0	0.726106	0.0803877	0	0
0	0	1	0	0	0	0	0
0.600271	0.0779856	1	0	0.738652	0	0	0
0.600271	0	1	0	0.690697	0	0	0
0	0	1	0	0.672537	0	0	0
0.576684	0.0760463	1	0	0.696193	0	0	0
0.609355	0	1	0	0.690697	0	0	0
0.591391	0.0828045	1	0	0.738652	0.0951153	0	0
0.369009	0	1	0	0	0	0	0
0.585343	0.0737181	1	0	0.70805	0	0	0
0.576684	0.0737181	1	0	0.68469	0	0	0
0	0	1	0	0	0	0	0
0.585343	0.0668166	1	0	0.70805	0	0	0
0	0	1	0	0	0	0	0
0.591391	0.0828045	1	0	0.713947	0.0926223	0	0
0	0	1	0	0.682715	0	0	0
0.374043	0	1	0	0	0	0	0
0	0	1	0	0.682715	0	0	0
0.591391	0.0852362	1	0	0.726106	0.0876829	0	0
0.561751	0.0650864	1	0	0.689714	0	0	0
0.609355	0	1	0	0.738652	0.075598	0	0
0	0	1	0	0	0	0	0
0	0	1	0	0	0	0	0
0.369009	0	1	0	0	0	0	0
0.609355	0	1	0	0.690697	0	0	0
0.594202	0	1	0	0.696193	0	0	0
0	0	1	0	0	0	0	0
0	0	1	0	0	0	0	0
0	0	1	0	0	0	0	0
0	0	1	0	0.682715	0	0	0
0	0	1	0	0	0	0	0
0.585343	0.0831165	1	0	0.68469	0	0	0
0.594202	0	1	0	0.68469	0	0	0
0.585343	0.0714038	1	0	0.70805	0	0	0
0	0	1	0	0	0	0	0
0.591391	0.0876829	1	0	0.726106	0.0901449	0	0
0.585343	0.0645434	1	0	0.70805	0	0	0
0.576684	0.09275	1	0	0.70805	0.09275	0	0
0.594202	0.0668166	1	0	0.720283	0	0	0
0	0	1	0	0	0	0	0
0.600271	0	1	0	0.738652	0.0732248	0	0
0	0	1	0	0	0	0	0
0	0	1	0	0.672537	0	0	0
0.576684	0.090319	1	0	0.696193	0.0760463	0	0
0	0	1	0	0	0	0	0
0.576684	0.090319	1	0	0.68469	0.0831165	0	0
0.374043	0	1	0	0	0	0	0
0	0	1	0	0.672537	0	0	0
0.576684	0	1	0	0.70805	0.0691034	0	0
0.576684	0	1	0	0.696193	0.0737181	0	0
0.585343	0.0691034	1	0	0.70805	0.0737181	0	0
0	0	1	0	0.672537	0	0	0
0	0	1	0	0.682715	0	0	0
0	0	1	0	0	0	0	0
0	0	1	0	0	0	0	0
0.576684	0.0714038	1	0	0.696193	0	0	0
0.603268	0	1	0	0.68469	0.0760463	0	0
0	0	1	0	0.682715	0	0	0
0	0	1	0	0	0	0	0
0	0	1	0	0	0	0	0
0.609355	0	1	0	0.713947	0	0	0
0	0	1	0	0	0	0	0
0	0	1	0	0.682715	0	0	0
0	0	1	0	0	0	0	0
0	0	1	0	0	0	0	0
0.585343	0.0691034	1	0	0.70805	0.0714038	0	0
0	0	1	0	0.672537	0	0	0
0.576684	0.0783886	1	0	0.68469	0.090319	0	0
0	0	1	0	0.682715	0	0	0
0.576684	0.0807453	1	0	0.696193	0	0	0
0.576684	0.0831165	1	0	0.696193	0.0831165	0	0
0	0	1	0	0.672537	0	0	0
0.374043	0	1	0	0	0	0	0
0	0	1	0	0.682715	0	0	0
0.576684	0.0783886	1	0	0.70805	0	0	0
0.585343	0.0714038	1	0	0.70805	0	0	0
0.600271	0	1	0	0.726106	0.0852362	0	0
0.383223	0	1	0	0	0	0	0
0.609355	0.0661894	1	0	0.713947	0	0	0
0	0	1	0	0.682715	0	0	0
0.576684	0.0783886	1	0	0.68469	0	0	0
0.594202	0.0645434	1	0	0.70805	0	0	0
0.600271	0	1	0	0.702151	0	0	0
0.594202	0	1	0	0.720283	0	0	0
0.576684	0.0831165	1	0	0.696193	0.0879032	0	0
0	0	1	0	0	0	0	0
0	0	1	0	0	0	0	0
0.576684	0.0737181	1	0	0.70805	0	0	0
0.568215	0.0855024	1	0	0.70805	0.090319	0	0
0	0	1	0	0	0	0	0
0.561751	0.0650864	1	0	0.689714	0	0	0
0	0	1	0	0	0	0	0
0	0	1	0	0	0	0	0
0.585343	0	1	0	0.70805	0.0737181	0	0
0.576684	0.0879032	1	0	0.696193	0.0783886	0	0
0	0	1	0	0	0	0	0
0.378066	0	1	0	0	0	0	0
0.576684	0.0807453	1	0	0.68469	0	0	0
0	0	1	0	0.672537	0	0	0
0.594202	0.0714038	1	0	0.70805	0	0	0
0	0	1	0	0	0	0	0
0	0	1	0	0	0	0	0
0	0	1	0	0	0	0	0
0.576684	0.0737181	1	0	0.68469	0	0	0
0	0	1	0	0	0	0	0
0	0	1	0	0	0	0	0
0	0	1	0	0.682715	0	0	0
0.585343	0	1	0	0.67352	0	0	0
0	0	1	0	0.672537	0	0	0
0.594202	0	1	0	0.696193	0	0	0
0.585343	0.0831165	1	0	0.68469	0	0	0
0.594202	0	1	0	0.68469	0	0	0
0.591391	0.0876829	1	0	0.713947	0.0803877	0	0
0	0	1	0	0	0	0	0
0	0	1	0	0.682715	0	0	0
0.568215	0.0807453	1	0	0.68469	0	0	0
0	0	1	0	0.682715	0	0	0
0	0	1	0	0	0	0	0
0.585343	0	1	0	0.70805	0.0668166	0	0
0	0	1	0	0	0	0	0
0	0	1	0	0.682715	0	0	0
0	0	1	0	0	0	0	0
0.594202	0	1	0	0.696193	0.0737181	0	0
0.585343	0.0737181	1	0	0.70805	0	0	0
0.576684	0.0783886	1	0	0.68469	0	0	0
0	0	1	0	0	0	0	0
0	0	1	0	0	0	0	0
0	0	1	0	0.672537	0	0	0
0.576684	0.0760463	1	0	0.68469	0	0	0
0	0	1	0	0	0	0	0
0.585343	0	1	0	0.720283	0.0760463	0	0
0	0	1	0	0	0	0	0
0.609355	0	1	0	0.713947	0	0	0
0.609355	0	1	0	0.690697	0	0	0
0.383223	0	1	0	0	0	0	0
0	0	1	0	0	0	0	0
0.383223	0	1	0	0	0	0	0
0	0	1	0	0.682715	0	0	0
0.378066	0	1	0	0	0	0	0
0.383223	0	1	0	0	0	0	0
0.576684	0.0760463	1	0	0.70805	0.100137	0	0
0.609355	0	1	0	0.713947	0	0	0
0.591391	0.0852362	1	0	0.738652	0.0901449	0	0
0.600271	0	1	0	0.726106	0.0779856	0	0
0.576684	0	1	0	0.696193	0.0668166	0	0
0	0	1	0	0	0	0	0
0	0	1	0	0.682715	0	0	0
0.609355	0.0661894	1	0	0.738652	0	0	0
0.576684	0	1	0	0.696193	0	0	0
0.576684	0	1	0	0.70805	0.0668166	0	0
0	0	1	0	0	0	0	0
0	0	1	0	0	0	0	0
0.585343	0	1	0	0.70805	0.0760463	0	0
0.576684	0	1	0	0.696193	0.0714038	0	0
0	0	1	0	0	0	0	0
0	0	1	0	0	0	0	0
0.594202	0	1	0	0.696193	0	0	0
0	0	1	0	0.682715	0	0	0
0.576684	0	1	0	0.70805	0.0760463	0	0
0.369009	0	1	0	0	0	0	0
0	0	1	0	0	0	0	0
0	0	1	0	0	0	0	0
0.369009	0	1	0	0	0	0	0
0.609355	0	1	0	0.713947	0	0	0
0.374043	0	1	0	0	0	0	0
0	0	1	0	0.682715	0	0	0
0.594202	0.0668166	1	0	0.720283	0	0	0
0.591391	0.0852362	1	0	0.738652	0.0901449	0	0
0	0	1	0	0	0	0	0
0.585343	0.0645434	1	0	0.696193	0.0783886	0	0
0.576684	0.0783886	1	0	0.68469	0	0	0
0	0	1	0	0	0	0	0
0.568215	0.0760463	1	0	0.70805	0	0	0
0.576684	0.0807453	1	0	0.68469	0	0	0
0	0	1	0	0	0	0	0
0.609355	0	1	0	0.726106	0	0	0
0.383223	0	1	0	0	0	0	0
0.609355	0.0708657	1	0	0.738652	0.0708657	0	0
0	0	1	0	0.682715	0	0	0
0.374043	0	1	0	0	0	0	0
0.591391	0.0828045	1	0	0.713947	0.0901449	0	0
0.591391	0.0852362	1	0	0.726106	0.0876829	0	0
0.600271	0	1	0	0.726106	0.0803877	0	0
0.585343	0	1	0	0.70805	0.0737181	0	0
0.378066	0	1	0	0	0	0	0
0.383223	0	1	0	0	0	0	0
0.568215	0.0807453	1	0	0.696193	0.09275	0	0
0	0	1	0	0	0	0	0
0.568215	0.0737181	1	0	0.68469	0	0	0
0.576684	0.0737181	1	0	0.70805	0	0	0
0.600271	0	1	0	0.713947	0	0	0
0.609355	0	1	0	0.713947	0	0	0
0.585343	0.0807453	1	0	0.68469	0	0	0
0.609355	0	1	0	0.690697	0	0	0
0	0	1	0	0	0	0	0
0.609355	0.0708657	1	0	0.738652	0	0	0
0.609355	0	1	0	0.690697	0	0	0
0	0	1	0	0	0	0	0
0	0	1	0	0	0	0	0
0.618653	0	1	0	0.713947	0	0	0
0	0	1	0	0	0	0	0
0.576684	0.0855024	1	0	0.68469	0.0855024	0	0
0	0	1	0	0.672537	0	0	0
0.568215	0.0831165	1	0	0.67352	0	0	0
0	0	1	0	0	0	0	0
0.576684	0.0951965	1	0	0.696193	0.0855024	0	0
0.585343	0	1	0	0.70805	0	0	0
0.600271	0	1	0	0.702151	0	0	0
0.585343	0.0645434	1	0	0.720283	0	0	0
0.369009	0	1	0	0	0	0	0
0.568215	0.0783886	1	0	0.696193	0.102631	0	0
0	0	1	0	0	0	0	0
0.374043	0	1	0	0	0	0	0
0.576684	0.0855024	1	0	0.696193	0.0831165	0	0
0.585343	0.0714038	1	0	0.720283	0	0	0
0.374043	0	1	0	0	0	0	0
0.609355	0	1	0	0.738652	0.0779856	0	0
0	0	1	0	0	0	0	0
0.618653	0	1	0	0.713947	0	0	0
0.609355	0	1	0	0.702151	0	0	0
0	0	1	0	0	0	0	0
0	0	1	0	0	0	0	0
0.618653	0	1	0	0.679565	0	0	0
0.369009	0	1	0	0	0	0	0
0.585343	0.0645434	1	0	0.720283	0.0691034	0	0
0.594202	0	1	0	0.68469	0	0	0
0	0	1	0	0	0	0	0
0.585343	0	1	0	0.696193	0	0	0
0.568215	0.0831165	1	0	0.696193	0.09275	0	0
0.576684	0.0807453	1	0	0.68469	0.0831165	0	0
0.600271	0	1	0	0.738652	0.075598	0	0
0.559929	0.090319	1	0	0.696193	0.0951965	0	0
0	0	1	0	0.672537	0	0	0
0.576684	0.0783886	1	0	0.68469	0	0	0
0	0	1	0	0	0	0	0
0.369009	0	1	0	0	0	0	0
0.585343	0	1	0	0.70805	0.0760463	0	0
0.576684	0.0831165	1	0	0.68469	0	0	0
0.383223	0	1	0	0	0	0	0
0.568215	0.0760463	1	0	0.696193	0	0	0
0.609355	0	1	0	0.702151	0	0	0
0.585343	0	1	0	0.696193	0	0	0
0.374043	0	1	0	0	0	0	0
0.374043	0	1	0	0	0	0	0
0.618653	0	1	0	0.726106	0.0732248	0	0
0.609355	0.0708657	1	0	0.713947	0	0	0
0.561751	0.0763587	1	0	0.666959	0	0	0
0.576684	0	1	0	0.696193	0.0714038	0	0
0.568215	0.0831165	1	0	0.70805	0.0951965	0	0
0.374043	0	1	0	0	0	0	0
0.576684	0	1	0	0.70805	0	0	0
0.568215	0.0783886	1	0	0.696193	0	0	0
0.600271	0.0661894	1	0	0.738652	0.0803877	0	0
0	0	1	0	0	0	0	0
0	0	1	0	0	0	0	0
0	0	1	0	0	0	0	0
0	0	1	0	0	0	0	0
0.559929	0.0831165	1	0	0.696193	0.100137	0	0
0	0	1	0	0.672537	0	0	0
0	0	1	0	0.682715	0	0	0
0.576684	0.0760463	1	0	0.696193	0	0	0
0.568215	0.0831165	1	0	0.696193	0.090319	0	0
0	0	1	0	0	0	0	0
0	0	1	0	0	0	0	0
0	0	1	0	0	0	0	0
0.568215	0.0783886	1	0	0.696193	0	0	0
0	0	1	0	0.672537	0	0	0
0.568215	0.0737181	1	0	0.696193	0	0	0
0	0	1	0	0	0	0	0
0	0	1	0	0	0	0	0
0	0	1	0	0	0	0	0
0.594202	0.0714038	1	0	0.720283	0	0	0
0	0	1	0	0	0	0	0
0	0	1	0	0	0	0	0
0.576684	0	1	0	0.696193	0	0	0
0.576684	0.0760463	1	0	0.696193	0	0	0
0.600271	0	1	0	0.726106	0.075598	0	0
0.600271	0.0803877	1	0	0.713947	0.0876829	0	0
0.600271	0.0828045	1	0	0.738652	0	0	0
0	0	1	0	0	0	0	0
0	0	1	0	0.682715	0	0	0
0	0	1	0	0	0	0	0
0.576684	0.0783886	1	0	0.68469	0	0	0
0.383223	0	1	0	0	0	0	0
0	0	1	0	0.682715	0	0	0
0.383223	0	1	0	0	0	0	0
0	0	1	0	0	0	0	0
0.568215	0.0807453	1	0	0.696193	0	0	0
0.576684	0.0807453	1	0	0.70805	0	0	0
0	0	1	0	0	0	0	0
0.383223	0	1	0	0	0	0	0
0.378066	0	1	0	0	0	0	0
0.576684	0.09275	1	0	0.68469	0.0855024	0	0
0.383223	0	1	0	0	0	0	0
0.609355	0	1	0	0.726106	0.0779856	0	0
0.576684	0	1	0	0.696193	0.0714038	0	0
0.591391	0.0901449	1	0	0.738652	0.0901449	0	0
0	0	1	0	0.682715	0	0	0
0.568215	0.0855024	1	0	0.696193	0.090319	0	0
0	0	1	0	0	0	0	0
0.576684	0	1	0	0.68469	0.0737181	0	0
0.585343	0.0760463	1	0	0.696193	0	0	0
0.594202	0.0668166	1	0	0.70805	0.0645434	0	0
0.576684	0	1	0	0.70805	0.0783886	0	0
0.600271	0	1	0	0.713947	0.0685206	0	0
0.585343	0	1	0	0.70805	0.0668166	0	0
0	0	1	0	0	0	0	0
0.585343	0	1	0	0.696193	0	0	0
0.576684	0	1	0	0.696193	0.0645434	0	0
0.585343	0	1	0	0.70805	0.0668166	0	0
0.609355	0.0732248	1	0	0.713947	0	0	0
0	0	1	0	0	0	0	0
0.568215	0.0855024	1	0	0.70805	0.09275	0	0
0	0	1	0	0	0	0	0
0.553501	0.074077	1	0	0.678164	0	0	0
0.383223	0	1	0	0	0	0	0
0.585343	0	1	0	0.696193	0.0714038	0	0
0	0	1	0	0	0	0	0
0.374043	0	1	0	0	0	0	0
0.576684	0.0783886	1	0	0.696193	0.0951965	0	0
0.568215	0.0737181	1	0	0.696193	0	0	0
0	0	1	0	0.682715	0	0	0
0.591391	0.0828045	1	0	0.713947	0.0828045	0	0
0	0	1	0	0	0	0	0
0.594202	0.0668166	1	0	0.720283	0	0	0
0.600271	0.0661894	1	0	0.738652	0.0803877	0	0
0	0	1	0	0	0	0	0
0.374043	0	1	0	0	0	0	0
0	0	1	0	0	0	0	0
0	0	1	0	0	0	0	0
0.591391	0.0852362	1	0	0.726106	0.075598	0	0
0.576684	0.0760463	1	0	0.696193	0.102631	0	0
0.568215	0	1	0	0.70805	0.0691034	0	0
0.576684	0.0807453	1	0	0.70805	0	0	0
0.576684	0.0783886	1	0	0.68469	0.0879032	0	0
0.609355	0	1	0	0.690697	0	0	0
0.600271	0.0803877	1	0	0.713947	0.0901449	0	0
0	0	1	0	0	0	0	0
0.591391	0.0852362	1	0	0.738652	0.0901449	0	0
0.591391	0.0732248	1	0	0.726106	0.0852362	0	0
0	0	1	0	0	0	0	0
0	0	1	0	0.672537	0	0	0
0.576684	0.0760463	1	0	0.68469	0	0	0
0.585343	0	1	0	0.70805	0.0737181	0	0
0	0	1	0	0.682715	0	0	0
0.576684	0.0831165	1	0	0.70805	0.0951965	0	0
0.582706	0.0828045	1	0	0.702151	0	0	0
0	0	1	0	0.682715	0	0	0
0	0	1	0	0.682715	0	0	0
0	0	1	0	0.672537	0	0	0
0.576684	0.0855024	1	0	0.68469	0.09275	0	0
0	0	1	0	0.682715	0	0	0
0.378066	0	1	0	0	0	0	0
0	0	1	0	0	0	0	0
0.600271	0.0876829	1	0	0.713947	0.0852362	0	0
0.383223	0	1	0	0	0	0	0
0	0	1	0	0.682715	0	0	0
0.374043	0	1	0	0	0	0	0
0.591391	0.0803877	1	0	0.726106	0.0828045	0	0
0.585343	0.0783886	1	0	0.70805	0	0	0
0.576684	0.0760463	1	0	0.696193	0	0	0
0.568215	0.0783886	1	0	0.70805	0.0951965	0	0
0	0	1	0	0	0	0	0
0.553501	0.0718091	1	0	0.678164	0	0	0
0	0	1	0	0.672537	0	0	0
0.383223	0	1	0	0	0	0	0
0	0	1	0	0.672537	0	0	0
0.591391	0.0852362	1	0	0.713947	0.0876829	0	0
0	0	1	0	0	0	0	0
0	0	1	0	0.682715	0	0	0
0.609355	0	1	0	0.738652	0.0732248	0	0
0	0	1	0	0	0	0	0
0	0	1	0	0	0	0	0
0.576684	0.0760463	1	0	0.67352	0.0976586	0	0
0	0	1	0	0	0	0	0
0.576684	0.0807453	1	0	0.68469	0	0	0
0.591391	0.0876829	1	0	0.713947	0.0828045	0	0
0	0	1	0	0	0	0	0
0	0	1	0	0	0	0	0
0.585343	0.0668166	1	0	0.70805	0	0	0
0	0	1	0	0.672537	0	0	0
0.600271	0.0852362	1	0	0.713947	0.0852362	0	0
0.383223	0	1	0	0	0	0	0
0.600271	0	1	0	0.713947	0	0	0
0.585343	0.0737181	1	0	0.70805	0	0	0
0.383223	0	1	0	0	0	0	0
0.600271	0	1	0	0.738652	0.0852362	0	0
0.568215	0.0737181	1	0	0.696193	0	0	0
0.576684	0.0831165	1	0	0.70805	0.0951965	0	0
0	0	1	0	0	0	0	0
0.378066	0	1	0	0	0	0	0
0.576684	0.0807453	1	0	0.696193	0.0831165	0	0
0.568215	0.0831165	1	0	0.70805	0.0951965	0	0
0.383223	0	1	0	0	0	0	0
0.576684	0.0831165	1	0	0.70805	0.09275	0	0
0	0	1	0	0	0	0	0
0.374043	0	1	0	0	0	0	0
0.568215	0.0760463	1	0	0.696193	0	0	0
0	0	1	0	0	0	0	0
0.600271	0	1	0	0.726106	0.0779856	0	0
0	0	1	0	0.682715	0	0	0
0.609355	0	1	0	0.738652	0.075598	0	0
0	0	1	0	0	0	0	0
0	0	1	0	0	0	0	0
0.374043	0	1	0	0	0	0	0
0.383223	0	1	0	0	0	0	0
0	0	1	0	0	0	0	0
0.585343	0	1	0	0.68469	0	0	0
0	0	1	0	0	0	0	0
0	0	1	0	0	0	0	0
0	0	1	0	0	0	0	0
0	0	1	0	0.682715	0	0	0
0.609355	0	1	0	0.713947	0	0	0
0	0	1	0	0	0	0	0
0.374043	0	1	0	0	0	0	0
0.609355	0.0661894	1	0	0.726106	0	0	0
0	0	1	0	0.682715	0	0	0
0.585343	0	1	0	0.696193	0	0	0
0	0	1	0	0.682715	0	0	0
0.576684	0	1	0	0.696193	0.0737181	0	0
0.374043	0	1	0	0	0	0	0
0	0	1	0	0.682715	0	0	0
0	0	1	0	0	0	0	0
0	0	1	0	0	0	0	0
0	0	1	0	0	0	0	0
0	0	1	0	0.682715	0	0	0
0.576684	0.0831165	1	0	0.696193	0.0831165	0	0
0	0	1	0	0	0	0	0
0	0	1	0	0	0	0	0
0.609355	0	1	0	0.738652	0.0803877	0	0
0.568215	0.0879032	1	0	0.68469	0.0879032	0	0
0.576684	0.0831165	1	0	0.68469	0	0	0
0.600271	0.0828045	1	0	0.713947	0.0803877	0	0
0	0	1	0	0	0	0	0
0.591391	0.0828045	1	0	0.713947	0.0901449	0	0
0.585343	0	1	0	0.696193	0.0737181	0	0
0.383223	0	1	0	0	0	0	0
0.576684	0	1	0	0.696193	0	0	0
0.576684	0	1	0	0.696193	0.0691034	0	0
0	0	1	0	0.682715	0	0	0
0.576684	0.0714038	1	0	0.696193	0	0	0
0	0	1	0	0	0	0	0
0.576684	0.0691034	1	0	0.70805	0	0	0
0.600271	0.0661894	1	0	0.726106	0.0852362	0	0
0.591391	0.0803877	1	0	0.738652	0.0901449	0	0
0.576684	0.0855024	1	0	0.696193	0.0831165	0	0
0	0	1	0	0.672537	0	0	0
0.383223	0	1	0	0	0	0	0
0.609355	0.075598	1	0	0.738652	0	0	0
0	0	1	0	0.682715	0	0	0
0	0	1	0	0.672537	0	0	0
0	0	1	0	0.682715	0	0	0
0.594202	0.0645434	1	0	0.70805	0	0	0
0.591391	0.0828045	1	0	0.738652	0.0951153	0	0
0.591391	0.0779856	1	0	0.713947	0.0876829	0	0
0.609355	0	1	0	0.726106	0	0	0
0.576684	0.0760463	1	0	0.696193	0	0	0
0.585343	0.0691034	1	0	0.70805	0	0	0
0	0	1	0	0	0	0	0
0	0	1	0	0	0	0	0
0.576684	0.0879032	1	0	0.70805	0	0	0
0.585343	0.0645434	1	0	0.720283	0.0691034	0	0
0	0	1	0	0	0	0	0
0.594202	0	1	0	0.70805	0.0714038	0	0
0	0	1	0	0.672537	0	0	0
0.568215	0.0737181	1	0	0.70805	0	0	0
0.374043	0	1	0	0	0	0	0
0.591391	0.0876829	1	0	0.738652	0.0852362	0	0
0.374043	0	1	0	0	0	0	0
0.383223	0	1	0	0	0	0	0
0.374043	0	1	0	0	0	0	0
0	0	1	0	0	0	0	0
0	0	1	0	0	0	0	0
0	0	1	0	0	0	0	0
0.600271	0	1	0	0.738652	0.0685206	0	0
0.609355	0	1	0	0.690697	0	0	0
0	0	1	0	0	0	0	0
0.591391	0.0852362	1	0	0.713947	0.0901449	0	0
0	0	1	0	0	0	0	0
0.576684	0.0831165	1	0	0.70805	0.09275	0	0
0	0	1	0	0	0	0	0
0	0	1	0	0	0	0	0
0	0	1	0	0.672537	0	0	0
0.594202	0.0668166	1	0	0.720283	0	0	0
0	0	1	0	0.672537	0	0	0
0	0	1	0	0	0	0	0
0.585343	0	1	0	0.70805	0	0	0
0	0	1	0	0	0	0	0
0	0	1	0	0	0	0	0
0	0	1	0	0.682715	0	0	0
0.576684	0.0737181	1	0	0.696193	0.09275	0	0
0	0	1	0	0	0	0	0
0.585343	0	1	0	0.696193	0	0	0
0.600271	0	1	0	0.738652	0	0	0
0.374043	0	1	0	0	0	0	0
0	0	1	0	0	0	0	0
0	0	1	0	0	0	0	0
0.585343	0.0691034	1	0	0.720283	0	0	0
0	0	1	0	0	0	0	0
0.378066	0	1	0	0	0	0	0
0	0	1	0	0.672537	0	0	0
0.576684	0.0807453	1	0	0.70805	0	0	0
0	0	1	0	0.682715	0	0	0
0	0	1	0	0	0	0	0
0.576684	0	1	0	0.696193	0.0714038	0	0
0	0	1	0	0.672537	0	0	0
0	0	1	0	0.682715	0	0	0
0.369009	0	1	0	0	0	0	0
0.591391	0.0876829	1	0	0.702151	0.0876829	0	0
0.591391	0.075598	1	0	0.738652	0.0926223	0	0
0	0	1	0	0	0	0	0
0	0	1	0	0.682715	0	0	0
0.600271	0	1	0	0.713947	0	0	0
0.600271	0	1	0	0.726106	0.0779856	0	0
0.585343	0	1	0	0.696193	0	0	0
0	0	1	0	0	0	0	0
0.609355	0	1	0	0.713947	0	0	0
0.609355	0.0803877	1	0	0.713947	0	0	0
0.374043	0	1	0	0	0	0	0
0	0	1	0	0	0	0	0
0.585343	0	1	0	0.696193	0.0668166	0	0
0.576684	0.0807453	1	0	0.696193	0	0	0
0	0	1	0	0.672537	0	0	0
0.383223	0	1	0	0	0	0	0
0	0	1	0	0	0	0	0
0.609355	0.0708657	1	0	0.738652	0	0	0
0.609355	0	1	0	0.726106	0.0661894	0	0
0.585343	0.0668166	1	0	0.70805	0	0	0
0	0	1	0	0	0	0	0
0.591391	0.0779856	1	0	0.738652	0.0926223	0	0
0.383223	0	1	0	0	0	0	0
0.594202	0.0645434	1	0	0.70805	0.0783886	0	0
0.383223	0	1	0	0	0	0	0
0.576684	0.0807453	1	0	0.696193	0.090319	0	0
0	0	1	0	0	0	0	0
0	0	1	0	0	0	0	0
0	0	1	0	0.672537	0	0	0
0	0	1	0	0	0	0	0
0.576684	0.0783886	1	0	0.68469	0	0	0
0	0	1	0	0	0	0	0
0.600271	0	1	0	0.702151	0	0	0
0	0	1	0	0.672537	0	0	0
0	0	1	0	0	0	0	0
0	0	1	0	0	0	0	0
0	0	1	0	0	0	0	0
0.585343	0	1	0	0.696193	0	0	0
0.591391	0.0779856	1	0	0.726106	0.0803877	0	0
0.378066	0	1	0	0	0	0	0
0	0	1	0	0	0	0	0
0.378066	0	1	0	0	0	0	0
0	0	1	0	0	0	0	0
0.591391	0.0901449	1	0	0.738652	0.0779856	0	0
0.576684	0.0737181	1	0	0.696193	0.100137	0	0
0.600271	0	1	0	0.702151	0	0	0
0.585343	0	1	0	0.696193	0.0645434	0	0
0	0	1	0	0.682715	0	0	0
0.383223	0	1	0	0	0	0	0
0.591391	0.0828045	1	0	0.713947	0.0926223	0	0
0.600271	0.075598	1	0	0.726106	0.0732248	0	0
0.576684	0.0855024	1	0	0.68469	0.09275	0	0
0	0	1	0	0	0	0	0
0	0	1	0	0.682715	0	0	0
0.369009	0	1	0	0	0	0	0
0	0	1	0	0	0	0	0
0	0	1	0	0.672537	0	0	0
0	0	1	0	0	0	0	0
0	0	1	0	0	0	0	0
0.585343	0	1	0	0.720283	0.0737181	0	0
0.561751	0.0695548	1	0	0.689714	0	0	0
0	0	1	0	0	0	0	0
0.576684	0.090319	1	0	0.70805	0.090319	0	0
0.374043	0	1	0	0	0	0	0
0.576684	0.0807453	1	0	0.696193	0.090319	0	0
0.585343	0	1	0	0.70805	0.0783886	0	0
0	0	1	0	0	0	0	0
0.568215	0.090319	1	0	0.68469	0.090319	0	0
0.609355	0	1	0	0.713947	0	0	0
0.609355	0	1	0	0.702151	0	0	0
0.568215	0.0879032	1	0	0.70805	0.0855024	0	0
0.609355	0	1	0	0.690697	0	0	0
0.600271	0.0661894	1	0	0.713947	0	0	0
0.600271	0.0828045	1	0	0.713947	0.0828045	0	0
0.576684	0.0760463	1	0	0.696193	0	0	0
0	0	1	0	0	0	0	0
0.594202	0.0668166	1	0	0.70805	0.0668166	0	0
0	0	1	0	0	0	0	0
0.576684	0.0783886	1	0	0.696193	0	0	0
0.576684	0.0807453	1	0	0.70805	0	0	0
0	0	1	0	0.672537	0	0	0
0.600271	0.0685206	1	0	0.726106	0	0	0
0	0	1	0	0	0	0	0
0.568215	0.0783886	1	0	0.68469	0.0879032	0	0
0.609355	0	1	0	0.713947	0	0	0
0	0	1	0	0	0	0	0
0.591391	0.0901449	1	0	0.738652	0.0828045	0	0
0.603268	0	1	0	0.68469	0.0760463	0	0
0	0	1	0	0	0	0	0
0.609355	0	1	0	0.726106	0.0803877	0	0
0.568215	0.0783886	1	0	0.70805	0	0	0
0.609355	0	1	0	0.726106	0.0852362	0	0
0	0	1	0	0	0	0	0
0.585343	0	1	0	0.696193	0.0645434	0	0
0.576684	0.0783886	1	0	0.696193	0	0	0
0.576684	0.0783886	1	0	0.68469	0	0	0
0	0	1	0	0	0	0	0
0	0	1	0	0	0	0	0
0.568215	0.0714038	1	0	0.696193	0	0	0
0.374043	0	1	0	0	0	0	0
0.383223	0	1	0	0	0	0	0
0	0	1	0	0.672537	0	0	0
0.591391	0.0779856	1	0	0.726106	0.0926223	0	0
0	0	1	0	0	0	0	0
0	0	1	0	0.682715	0	0	0
0.576684	0	1	0	0.696193	0.0714038	0	0
0	0	1	0	0.672537	0	0	0
0.594202	0	1	0	0.70805	0.0714038	0	0
0	0	1	0	0.672537	0	0	0
0	0	1	0	0	0	0	0
0.594202	0	1	0	0.70805	0	0	0
0.568215	0.0855024	1	0	0.696193	0.090319	0	0
0.585343	0.0691034	1	0	0.70805	0	0	0
0.585343	0	1	0	0.696193	0.0645434	0	0
0	0	1	0	0	0	0	0
0.576684	0.0855024	1	0	0.68469	0.09275	0	0
0.594202	0.0668166	1	0	0.720283	0	0	0
0	0	1	0	0	0	0	0
0	0	1	0	0	0	0	0
0	0	1	0	0.672537	0	0	0
0.568215	0.0760463	1	0	0.696193	0.09275	0	0
0	0	1	0	0	0	0	0
0	0	1	0	0.672537	0	0	0
0	0	1	0	0.682715	0	0	0
0.576684	0	1	0	0.696193	0.0714038	0	0
0.600271	0	1	0	0.726106	0.075598	0	0
0	0	1	0	0	0	0	0
0.585343	0	1	0	0.696193	0	0	0
0.594202	0	1	0	0.70805	0.0714038	0	0
0.600271	0	1	0	0.702151	0	0	0
0.374043	0	1	0	0	0	0	0
0.594202	0	1	0	0.70805	0.0691034	0	0
0	0	1	0	0.672537	0	0	0
0.561751	0.0763587	1	0	0.666959	0	0	0
0	0	1	0	0	0	0	0
0	0	1	0	0	0	0	0
0.369009	0	1	0	0	0	0	0
0	0	1	0	0	0	0	0
0.585343	0.0783886	1	0	0.696193	0	0	0
0.576684	0	1	0	0.696193	0.0760463	0	0
0.594202	0.0668166	1	0	0.70805	0	0	0
0.576684	0.0783886	1	0	0.68469	0	0	0
0.568215	0.0879032	1	0	0.696193	0.090319	0	0
0	0	1	0	0	0	0	0
0	0	1	0	0.682715	0	0	0
0.585343	0	1	0	0.696193	0.0760463	0	0
0.559929	0.0807453	1	0	0.70805	0.0951965	0	0
0	0	1	0	0	0	0	0
0.378066	0	1	0	0	0	0	0
0	0	1	0	0	0	0	0
0.585343	0.0645434	1	0	0.70805	0	0	0
0.594202	0.0691034	1	0	0.70805	0.0668166	0	0
0.609355	0	1	0	0.713947	0	0	0
0.585343	0	1	0	0.696193	0	0	0
0.594202	0.0645434	1	0	0.70805	0.0760463	0	0
0	0	1	0	0	0	0	0
0.374043	0	1	0	0	0	0	0
0.576684	0.0807453	1	0	0.70805	0	0	0
0.576684	0.0760463	1	0	0.68469	0	0	0
0	0	1	0	0	0	0	0
0.568215	0.0879032	1	0	0.70805	0.090319	0	0
0	0	1	0	0.672537	0	0	0
0.369009	0	1	0	0	0	0	0
0.576684	0.0783886	1	0	0.696193	0	0	0
0	0	1	0	0	0	0	0
0.594202	0	1	0	0.70805	0	0	0
0	0	1	0	0	0	0	0
0.591391	0.0828045	1	0	0.726106	0.0926223	0	0
0.585343	0.0831165	1	0	0.68469	0	0	0
0.576684	0.0807453	1	0	0.68469	0.0807453	0	0
0.585343	0	1	0	0.70805	0.0668166	0	0
0	0	1	0	0	0	0	0
0.576684	0.0807453	1	0	0.70805	0	0	0
0	0	1	0	0	0	0	0
0.576684	0.0831165	1	0	0.696193	0	0	0
0.378066	0	1	0	0	0	0	0
0.576684	0	1	0	0.696193	0.0714038	0	0
0	0	1	0	0	0	0	0
0	0	1	0	0.682715	0	0	0
0	0	1	0	0.682715	0	0	0
0	0	1	0	0	0	0	0
0.591391	0.075598	1	0	0.713947	0.0876829	0	0
0.374043	0	1	0	0	0	0	0
0.576684	0.0760463	1	0	0.696193	0	0	0
0	0	1	0	0	0	0	0
0.561751	0.0695548	1	0	0.689714	0	0	0
0.609355	0	1	0	0.726106	0.0661894	0	0
0	0	1	0	0	0	0	0
0	0	1	0	0	0	0	0
0	0	1	0	0.672537	0	0	0
0	0	1	0	0.682715	0	0	0
0.383223	0	1	0	0	0	0	0
0	0	1	0	0	0	0	0
0.594202	0	1	0	0.696193	0	0	0
0	0	1	0	0	0	0	0
0.600271	0	1	0	0.726106	0.0803877	0	0
0.609355	0	1	0	0.738652	0.0732248	0	0
0.585343	0.0807453	1	0	0.70805	0	0	0
0.594202	0	1	0	0.720283	0.0760463	0	0
0	0	1	0	0.672537	0	0	0
0.609355	0.0685206	1	0	0.738652	0	0	0
0	0	1	0	0	0	0	0
0.374043	0	1	0	0	0	0	0
0.374043	0	1	0	0	0	0	0
0	0	1	0	0.682715	0	0	0
0	0	1	0	0	0	0	0
0.568215	0.0879032	1	0	0.70805	0.090319	0	0
0.576684	0	1	0	0.696193	0	0	0
0	0	1	0	0	0	0	0
0.374043	0	1	0	0	0	0	0
0	0	1	0	0	0	0	0
0	0	1	0	0	0	0	0
0.585343	0	1	0	0.696193	0	0	0
0.585343	0.0737181	1	0	0.70805	0	0	0
0.609355	0	1	0	0.702151	0	0	0
0	0	1	0	0	0	0	0
0.568215	0.0783886	1	0	0.696193	0.0807453	0	0
0.591391	0.0828045	1	0	0.713947	0.0876829	0	0
0.600271	0.0828045	1	0	0.738652	0	0	0
0	0	1	0	0	0	0	0
0.609355	0.0708657	1	0	0.726106	0	0	0
0.600271	0.0828045	1	0	0.702151	0	0	0
0	0	1	0	0.682715	0	0	0
0	0	1	0	0	0	0	0
0.383223	0	1	0	0	0	0	0
0	0	1	0	0	0	0	0
0	0	1	0	0	0	0	0
0.585343	0.0645434	1	0	0.720283	0	0	0
0	0	1	0	0.672537	0	0	0
0.559929	0.0879032	1	0	0.696193	0.0976586	0	0
0	0	1	0	0	0	0	0
0	0	1	0	0.682715	0	0	0
0.591391	0.0828045	1	0	0.726106	0.0852362	0	0
0	0	1	0	0.682715	0	0	0
0.600271	0.0828045	1	0	0.713947	0.0901449	0	0
0.591391	0.0852362	1	0	0.713947	0.0876829	0	0
0.585343	0.0668166	1	0	0.70805	0	0	0
0.609355	0	1	0	0.738652	0	0	0
0.618653	0	1	0	0.713947	0.0732248	0	0
0	0	1	0	0	0	0	0
0	0	1	0	0.682715	0	0	0
0.576684	0.0831165	1	0	0.696193	0.0879032	0	0
0	0	1	0	0.682715	0	0	0
0.609355	0	1	0	0.738652	0.0732248	0	0
0	0	1	0	0	0	0	0
0.585343	0	1	0	0.68469	0.0714038	0	0
0.576684	0.0879032	1	0	0.68469	0.0879032	0	0
0.600271	0	1	0	0.726106	0.0779856	0	0
0.609355	0	1	0	0.690697	0	0	0
0	0	1	0	0	0	0	0
0	0	1	0	0	0	0	0
0	0	1	0	0	0	0	0
0.594202	0	1	0	0.720283	0	0	0
0.576684	0.0807453	1	0	0.70805	0	0	0
0.600271	0	1	0	0.726106	0.0779856	0	0
0	0	1	0	0	0	0	0
0.576684	0.0714038	1	0	0.68469	0	0	0
0.576684	0.0760463	1	0	0.68469	0	0	0
0	0	1	0	0.682715	0	0	0
0.585343	0.0737181	1	0	0.70805	0	0	0
0.600271	0	1	0	0.690697	0	0	0
0.600271	0	1	0	0.713947	0	0	0
0	0	1	0	0.682715	0	0	0
0.609355	0	1	0	0.679565	0	0	0
0.585343	0.0760463	1	0	0.696193	0	0	0
0	0	1	0	0	0	0	0
0.561751	0.0695548	1	0	0.689714	0	0	0
0.383223	0	1	0	0	0	0	0
0	0	1	0	0.682715	0	0	0
0.576684	0.0760463	1	0	0.68469	0.09275	0	0
0.568215	0.0783886	1	0	0.68469	0.0951965	0	0
0.369009	0	1	0	0	0	0	0
0.594202	0	1	0	0.696193	0.0691034	0	0
0.568215	0	1	0	0.70805	0.0737181	0	0
0.594202	0.0645434	1	0	0.70805	0	0	0
0.568215	0.0855024	1	0	0.68469	0	0	0
0.585343	0	1	0	0.696193	0.0691034	0	0
0	0	1	0	0.682715	0	0	0
0.585343	0	1	0	0.696193	0.0783886	0	0
0.600271	0	1	0	0.738652	0.0732248	0	0
0.383223	0	1	0	0	0	0	0
0	0	1	0	0	0	0	0
0.378066	0	1	0	0	0	0	0
0	0	1	0	0.672537	0	0	0
0.374043	0	1	0	0	0	0	0
0.594202	0.0645434	1	0	0.70805	0.0691034	0	0
0.576684	0.0783886	1	0	0.67352	0	0	0
0.576684	0.0783886	1	0	0.696193	0	0	0
0	0	1	0	0	0	0	0
0	0	1	0	0.682715	0	0	0
0	0	1	0	0.672537	0	0	0
0.609355	0.0685206	1	0	0.738652	0	0	0
0.576684	0	1	0	0.70805	0.0645434	0	0
0.600271	0	1	0	0.702151	0	0	0
0	0	1	0	0	0	0	0
0.594202	0	1	0	0.70805	0.0783886	0	0
0.609355	0.0661894	1	0	0.713947	0	0	0
0.609355	0	1	0	0.738652	0.075598	0	0
0.576684	0.0855024	1	0	0.67352	0.090319	0	0
0	0	1	0	0	0	0	0
0.374043	0	1	0	0	0	0	0
0	0	1	0	0	0	0	0
0.594202	0	1	0	0.696193	0.0645434	0	0
0.568215	0.0831165	1	0	0.696193	0.09275	0	0
0.600271	0	1	0	0.702151	0	0	0
0.378066	0	1	0	0	0	0	0
0.568215	0.0760463	1	0	0.68469	0	0	0
0	0	1	0	0.672537	0	0	0
0	0	1	0	0.682715	0	0	0
0	0	1	0	0	0	0	0
0.568215	0.0807453	1	0	0.70805	0.0951965	0	0
0	0	1	0	0	0	0	0
0.585343	0.0737181	1	0	0.720283	0	0	0
0.576684	0.0807453	1	0	0.696193	0.0831165	0	0
0	0	1	0	0	0	0	0
0	0	1	0	0	0	0	0
0	0	1	0	0	0	0	0
0.568215	0.0879032	1	0	0.696193	0.0951965	0	0
0	0	1	0	0	0	0	0
0	0	1	0	0.672537	0	0	0
0.594202	0	1	0	0.67352	0	0	0
0	0	1	0	0	0	0	0
0.369009	0	1	0	0	0	0	0
0.374043	0	1	0	0	0	0	0
0.600271	0	1	0	0.713947	0	0	0
0.576684	0.0807453	1	0	0.70805	0	0	0
0.553501	0.0763587	1	0	0.678164	0	0	0
0.576684	0.0807453	1	0	0.696193	0.0831165	0	0
0.576684	0.0760463	1	0	0.70805	0	0	0
0.576684	0	1	0	0.696193	0.0737181	0	0
0	0	1	0	0	0	0	0
0	0	1	0	0	0	0	0
0	0	1	0	0	0	0	0
0	0	1	0	0.672537	0	0	0
0.594202	0	1	0	0.696193	0.0783886	0	0
0	0	1	0	0	0	0	0
0	0	1	0	0.672537	0	0	0
0	0	1	0	0.672537	0	0	0
0.594202	0.0783886	1	0	0.696193	0	0	0
0	0	1	0	0	0	0	0
0.576684	0.0855024	1	0	0.68469	0.09275	0	0
0.594202	0.0691034	1	0	0.70805	0	0	0
0.576684	0.0760463	1	0	0.70805	0	0	0
0.594202	0.0714038	1	0	0.70805	0	0	0
0	0	1	0	0	0	0	0
0.576684	0.0714038	1	0	0.70805	0	0	0
0.576684	0	1	0	0.696193	0.0714038	0	0
0.576684	0.0691034	1	0	0.70805	0	0	0
0.594202	0.0691034	1	0	0.720283	0	0	0
0	0	1	0	0.682715	0	0	0
0.374043	0	1	0	0	0	0	0
0	0	1	0	0.672537	0	0	0
0.591391	0.0828045	1	0	0.713947	0.0901449	0	0
0	0	1	0	0.672537	0	0	0
0.585343	0.0737181	1	0	0.70805	0	0	0
0	0	1	0	0	0	0	0
0	0	1	0	0.682715	0	0	0
0.585343	0.0737181	1	0	0.70805	0	0	0
0.576684	0.0760463	1	0	0.68469	0	0	0
0.576684	0.0807453	1	0	0.70805	0.0879032	0	0
0.591391	0.075598	1	0	0.713947	0.0876829	0	0
0.594202	0.0645434	1	0	0.70805	0	0	0
0.585343	0	1	0	0.70805	0.0737181	0	0
0.374043	0	1	0	0	0	0	0
0	0	1	0	0	0	0	0
0	0	1	0	0	0	0	0
0.576684	0.0760463	1	0	0.696193	0.0879032	0	0
0.600271	0	1	0	0.738652	0.0803877	0	0
0.374043	0	1	0	0	0	0	0
0.568215	0.0783886	1	0	0.70805	0	0	0
0.374043	0	1	0	0	0	0	0
0	0	1	0	0.682715	0	0	0
0.600271	0	1	0	0.713947	0.0803877	0	0
0	0	1	0	0	0	0	0
0	0	1	0	0	0	0	0
0.594202	0.0668166	1	0	0.720283	0	0	0
0	0	1	0	0	0	0	0
0.576684	0.0714038	1	0	0.696193	0	0	0
0.561751	0.0786544	1	0	0.678164	0	0	0
0.383223	0	1	0	0	0	0	0
0	0	1	0	0.672537	0	0	0
0.609355	0	1	0	0.702151	0	0	0
0.576684	0.0760463	1	0	0.696193	0	0	0
0	0	1	0	0	0	0	0
0	0	1	0	0.672537	0	0	0
0.576684	0.0807453	1	0	0.696193	0.09275	0	0
0.369009	0	1	0	0	0	0	0
0	0	1	0	0	0	0	0
0	0	1	0	0	0	0	0
0	0	1	0	0	0	0	0
0	0	1	0	0	0	0	0
0	0	1	0	0	0	0	0
0.600271	0.0828045	1	0	0.713947	0.0876829	0	0
0.585343	0	1	0	0.68469	0	0	0
0	0	1	0	0	0	0	0
0.585343	0	1	0	0.696193	0.0783886	0	0
0	0	1	0	0	0	0	0
0	0	1	0	0	0	0	0
0.594202	0.0691034	1	0	0.70805	0	0	0
0	0	1	0	0.682715	0	0	0
0.369009	0	1	0	0	0	0	0
0.568215	0.0760463	1	0	0.696193	0	0	0
0.585343	0	1	0	0.70805	0.0737181	0	0
0.378066	0	1	0	0	0	0	0
0.576684	0.0737181	1	0	0.68469	0	0	0
0.600271	0	1	0	0.713947	0.0803877	0	0
0.378066	0	1	0	0	0	0	0
0.585343	0	1	0	0.720283	0.0737181	0	0
0	0	1	0	0	0	0	0
0.600271	0	1	0	0.726106	0.0779856	0	0
0	0	1	0	0.682715	0	0	0
0	0	1	0	0	0	0	0
0.576684	0	1	0	0.696193	0.0760463	0	0
0	0	1	0	0.682715	0	0	0
0.594202	0	1	0	0.70805	0.0645434	0	0
0.591391	0.0852362	1	0	0.738652	0.0926223	0	0
0	0	1	0	0	0	0	0
0.618653	0	1	0	0.713947	0	0	0
0.600271	0.0708657	1	0	0.726106	0	0	0
0	0	1	0	0.672537	0	0	0
0.568215	0.0783886	1	0	0.70805	0.0951965	0	0
0.568215	0.0831165	1	0	0.70805	0.0951965	0	0
0.600271	0.0708657	1	0	0.738652	0.0803877	0	0
0	0	1	0	0	0	0	0
0.553501	0.0695548	1	0	0.678164	0	0	0
0	0	1	0	0.682715	0	0	0
0.600271	0	1	0	0.713947	0	0	0
0.374043	0	1	0	0	0	0	0
0.378066	0	1	0	0	0	0	0
0	0	1	0	0.682715	0	0	0
0.600271	0.075598	1	0	0.713947	0	0	0
0.568215	0	1	0	0.70805	0.0691034	0	0
0.374043	0	1	0	0	0	0	0
0.374043	0	1	0	0	0	0	0
0	0	1	0	0	0	0	0
0.600271	0	1	0	0.713947	0	0	0
0	0	1	0	0	0	0	0
0.585343	0	1	0	0.696193	0.0714038	0	0
0.374043	0	1	0	0	0	0	0
0.576684	0.0760463	1	0	0.70805	0	0	0
0	0	1	0	0	0	0	0
0.369009	0	1	0	0	0	0	0
0.585343	0	1	0	0.720283	0.0691034	0	0
0	0	1	0	0.682715	0	0	0
0.374043	0	1	0	0	0	0	0
0	0	1	0	0	0	0	0
0	0	1	0	0	0	0	0
0.585343	0	1	0	0.696193	0.0668166	0	0
0.576684	0.0807453	1	0	0.70805	0	0	0
0	0	1	0	0	0	0	0
0	0	1	0	0.682715	0	0	0
0.369009	0	1	0	0	0	0	0
0	0	1	0	0	0	0	0
0.609355	0.0661894	1	0	0.726106	0	0	0
0	0	1	0	0	0	0	0
0.585343	0.0645434	1	0	0.70805	0.0807453	0	0
0	0	1	0	0	0	0	0
0.576684	0.0737181	1	0	0.696193	0	0	0
0.600271	0.0779856	1	0	0.713947	0.0901449	0	0
0.585343	0	1	0	0.68469	0	0	0
0.568215	0.0760463	1	0	0.696193	0	0	0
0.585343	0	1	0	0.70805	0.0760463	0	0
0.374043	0	1	0	0	0	0	0
0.600271	0.0732248	1	0	0.738652	0.075598	0	0
0	0	1	0	0.682715	0	0	0
0	0	1	0	0.682715	0	0	0
0	0	1	0	0	0	0	0
0	0	1	0	0	0	0	0
0	0	1	0	0.682715	0	0	0
0.576684	0.0831165	1	0	0.696193	0.0831165	0	0
0	0	1	0	0.672537	0	0	0
0	0	1	0	0	0	0	0
0.576684	0.0807453	1	0	0.696193	0	0	0
0	0	1	0	0	0	0	0
0.561751	0.074077	1	0	0.678164	0	0	0
0	0	1	0	0	0	0	0
0.576684	0.0760463	1	0	0.70805	0	0	0
0.600271	0	1	0	0.738652	0.0803877	0	0
0	0	1	0	0.672537	0	0	0
0	0	1	0	0.682715	0	0	0
0.383223	0	1	0	0	0	0	0
0.600271	0.0732248	1	0	0.726106	0.0876829	0	0
0	0	1	0	0	0	0	0
0.585343	0	1	0	0.696193	0	0	0
0.600271	0.0828045	1	0	0.713947	0.0803877	0	0
0.585343	0.0714038	1	0	0.720283	0	0	0
0.374043	0	1	0	0	0	0	0
0	0	1	0	0	0	0	0
0	0	1	0	0	0	0	0
0	0	1	0	0	0	0	0
0.576684	0.0783886	1	0	0.68469	0	0	0
0.594202	0.0645434	1	0	0.70805	0.0807453	0	0
0	0	1	0	0	0	0	0
0	0	1	0	0.682715	0	0	0
0	0	1	0	0	0	0	0
0	0	1	0	0	0	0	0
0.609355	0	1	0	0.726106	0	0	0
0.378066	0	1	0	0	0	0	0
0	0	1	0	0	0	0	0
0	0	1	0	0.682715	0	0	0
0.383223	0	1	0	0	0	0	0
0.576684	0.0831165	1	0	0.70805	0.0976586	0	0
0	0	1	0	0.682715	0	0	0
0	0	1	0	0.682715	0	0	0
0.383223	0	1	0	0	0	0	0
0	0	1	0	0	0	0	0
0.374043	0	1	0	0	0	0	0
0.576684	0.0760463	1	0	0.68469	0	0	0
0.594202	0.0714038	1	0	0.70805	0	0	0
0	0	1	0	0	0	0	0
0.383223	0	1	0	0	0	0	0
0	0	1	0	0	0	0	0
0.383223	0	1	0	0	0	0	0
0	0	1	0	0	0	0	0
0	0	1	0	0.672537	0	0	0
0.600271	0.0708657	1	0	0.726106	0	0	0
0	0	1	0	0	0	0	0
0.585343	0	1	0	0.696193	0.0691034	0	0
0	0	1	0	0	0	0	0
0.576684	0.0807453	1	0	0.68469	0	0	0
0.576684	0.0807453	1	0	0.68469	0	0	0
0.618653	0	1	0	0.679565	0	0	0
0	0	1	0	0.682715	0	0	0
0	0	1	0	0	0	0	0
0.383223	0	1	0	0	0	0	0
0	0	1	0	0.672537	0	0	0
0.576684	0.0879032	1	0	0.696193	0.0855024	0	0
0	0	1	0	0.682715	0	0	0
0	0	1	0	0	0	0	0
0.594202	0	1	0	0.70805	0.0691034	0	0
0.576684	0	1	0	0.696193	0.0714038	0	0
0.585343	0.0691034	1	0	0.720283	0	0	0
0.585343	0	1	0	0.720283	0	0	0
0	0	1	0	0.672537	0	0	0
0.591391	0.0779856	1	0	0.751608	0.0951153	0	0
0.576684	0.0783886	1	0	0.696193	0	0	0
0.576684	0	1	0	0.70805	0	0	0
0.594202	0	1	0	0.68469	0.0668166	0	0
0.568215	0.0760463	1	0	0.696193	0	0	0
0.609355	0	1	0	0.738652	0.0732248	0	0
0.576684	0	1	0	0.70805	0.0737181	0	0
0	0	1	0	0	0	0	0
0.594202	0	1	0	0.70805	0	0	0
0.591391	0.0803877	1	0	0.713947	0.0901449	0	0
0.576684	0.0831165	1	0	0.696193	0.09275	0	0
0.609355	0.0779856	1	0	0.726106	0	0	0
0.600271	0	1	0	0.713947	0.0803877	0	0
0.576684	0.0807453	1	0	0.68469	0	0	0
0.383223	0	1	0	0	0	0	0
0	0	1	0	0	0	0	0
0.374043	0	1	0	0	0	0	0
0	0	1	0	0	0	0	0
0.591391	0.0876829	1	0	0.751608	0.0926223	0	0
0.618653	0	1	0	0.713947	0	0	0
0	0	1	0	0	0	0	0
0.576684	0.0831165	1	0	0.696193	0.090319	0	0
0.568215	0.0855024	1	0	0.696193	0.0879032	0	0
0.609355	0	1	0	0.713947	0	0	0
0.609355	0	1	0	0.713947	0	0	0
0.576684	0.0807453	1	0	0.68469	0.090319	0	0
0	0	1	0	0.672537	0	0	0
0.561751	0.0695548	1	0	0.678164	0	0	0
0	0	1	0	0	0	0	0
0	0	1	0	0	0	0	0
0	0	1	0	0	0	0	0
0.591391	0.0828045	1	0	0.738652	0.0926223	0	0
0	0	1	0	0	0	0	0
0.576684	0.090319	1	0	0.696193	0.090319	0	0
0.576684	0.0783886	1	0	0.696193	0.09275	0	0
0.383223	0	1	0	0	0	0	0
0.609355	0	1	0	0.690697	0	0	0
0.576684	0.0855024	1	0	0.696193	0.0951965	0	0
0	0	1	0	0.672537	0	0	0
0.576684	0.0760463	1	0	0.68469	0	0	0
0.568215	0.0807453	1	0	0.696193	0.09275	0	0
0.374043	0	1	0	0	0	0	0
0.600271	0	1	0	0.690697	0	0	0
0	0	1	0	0	0	0	0
0.591391	0.0828045	1	0	0.726106	0.0828045	0	0
0.594202	0	1	0	0.70805	0	0	0
0	0	1	0	0	0	0	0
0	0	1	0	0	0	0	0
0.576684	0	1	0	0.70805	0.0737181	0	0
0.600271	0	1	0	0.713947	0.0803877	0	0
0.585343	0	1	0	0.696193	0.0760463	0	0
0	0	1	0	0	0	0	0
0	0	1	0	0	0	0	0
0.600271	0	1	0	0.738652	0.0828045	0	0
0	0	1	0	0.682715	0	0	0
0	0	1	0	0	0	0	0
0.594202	0	1	0	0.696193	0.0783886	0	0
0	0	1	0	0	0	0	0
0	0	1	0	0.682715	0	0	0
0.591391	0.0828045	1	0	0.738652	0.0926223	0	0
0.594202	0.0668166	1	0	0.720283	0	0	0
0	0	1	0	0.682715	0	0	0
0	0	1	0	0.682715	0	0	0
0.561751	0.0695548	1	0	0.689714	0	0	0
0.576684	0	1	0	0.70805	0.0714038	0	0
0	0	1	0	0	0	0	0
0.594202	0	1	0	0.696193	0.0783886	0	0
0.585343	0.0691034	1	0	0.720283	0	0	0
0	0	1	0	0	0	0	0
0.576684	0.0783886	1	0	0.68469	0	0	0
0.383223	0	1	0	0	0	0	0
0.576684	0.090319	1	0	0.70805	0.0855024	0	0
0	0	1	0	0	0	0	0
0.576684	0.0831165	1	0	0.68469	0	0	0
0.576684	0.0831165	1	0	0.696193	0.090319	0	0
0.383223	0	1	0	0	0	0	0
0.378066	0	1	0	0	0	0	0
0	0	1	0	0	0	0	0
0.600271	0	1	0	0.702151	0	0	0
0.568215	0.0760463	1	0	0.696193	0	0	0
0.600271	0.0876829	1	0	0.726106	0.0779856	0	0
0	0	1	0	0	0	0	0
0.585343	0.0714038	1	0	0.720283	0	0	0
0.576684	0.0737181	1	0	0.696193	0	0	0
0	0	1	0	0	0	0	0
0	0	1	0	0.672537	0	0	0
0.561751	0.0695548	1	0	0.689714	0	0	0
0	0	1	0	0.672537	0	0	0
0.568215	0.0879032	1	0	0.696193	0.0855024	0	0
0.585343	0	1	0	0.70805	0.0783886	0	0
0	0	1	0	0.672537	0	0	0
0.568215	0.0783886	1	0	0.70805	0	0	0
0.600271	0.0803877	1	0	0.713947	0.0926223	0	0
0	0	1	0	0.672537	0	0	0
0	0	1	0	0	0	0	0
0	0	1	0	0	0	0	0
0	0	1	0	0	0	0	0
0.374043	0	1	0	0	0	0	0
0.383223	0	1	0	0	0	0	0
0	0	1	0	0	0	0	0
0.600271	0	1	0	0.713947	0.0828045	0	0
0.568215	0.0831165	1	0	0.68469	0	0	0
0	0	1	0	0	0	0	0
0.594202	0.0645434	1	0	0.70805	0.0760463	0	0
0.585343	0.0691034	1	0	0.70805	0	0	0
0.585343	0	1	0	0.720283	0	0	0
0.568215	0.0879032	1	0	0.70805	0.09275	0	0
0.576684	0.0783886	1	0	0.696193	0	0	0
0.594202	0.0645434	1	0	0.70805	0.0783886	0	0
0.568215	0.0760463	1	0	0.696193	0	0	0
0.576684	0.0783886	1	0	0.696193	0.090319	0	0
0	0	1	0	0	0	0	0
0.591391	0.0803877	1	0	0.713947	0.0901449	0	0
0.378066	0	1	0	0	0	0	0
0	0	1	0	0	0	0	0
0.585343	0	1	0	0.70805	0.0668166	0	0
0.568215	0.0831165	1	0	0.696193	0.100137	0	0
0.576684	0.0760463	1	0	0.68469	0	0	0
0.585343	0	1	0	0.70805	0.0737181	0	0
0.374043	0	1	0	0	0	0	0
0	0	1	0	0	0	0	0
0.618653	0	1	0	0.713947	0	0	0
0.609355	0.0732248	1	0	0.726106	0	0	0
0.600271	0.0828045	1	0	0.713947	0.0876829	0	0
0	0	1	0	0	0	0	0
0	0	1	0	0	0	0	0
0.585343	0.0737181	1	0	0.70805	0	0	0
0	0	1	0	0.672537	0	0	0
0.561751	0.074077	1	0	0.689714	0	0	0
0	0	1	0	0	0	0	0
0	0	1	0	0.672537	0	0	0
0	0	1	0	0.672537	0	0	0
0	0	1	0	0	0	0	0
0.383223	0	1	0	0	0	0	0
0.561751	0.0718091	1	0	0.666959	0	0	0
0	0	1	0	0.682715	0	0	0
0	0	1	0	0	0	0	0
0.374043	0	1	0	0	0	0	0
0.374043	0	1	0	0	0	0	0
0	0	1	0	0	0	0	0
0	0	1	0	0	0	0	0
0.568215	0.0855024	1	0	0.696193	0.090319	0	0
0.609355	0.0661894	1	0	0.738652	0	0	0
0	0	1	0	0	0	0	0
0.568215	0.0783886	1	0	0.70805	0	0	0
0.600271	0	1	0	0.713947	0	0	0
0.576684	0.0760463	1	0	0.70805	0	0	0
0.600271	0	1	0	0.726106	0.0803877	0	0
0.585343	0	1	0	0.696193	0.0737181	0	0
0.576684	0.0807453	1	0	0.68469	0	0	0
0.585343	0	1	0	0.720283	0	0	0
0.576684	0.0691034	1	0	0.70805	0	0	0
0.576684	0.0760463	1	0	0.70805	0	0	0
0.591391	0.0876829	1	0	0.702151	0.0876829	0	0
0	0	1	0	0	0	0	0
0.374043	0	1	0	0	0	0	0
0.576684	0.0783886	1	0	0.68469	0	0	0
0.568215	0.0783886	1	0	0.70805	0	0	0
0.374043	0	1	0	0	0	0	0
0	0	1	0	0	0	0	0
0.383223	0	1	0	0	0	0	0
0.553501	0.074077	1	0	0.678164	0	0	0
0	0	1	0	0	0	0	0
0.576684	0	1	0	0.696193	0	0	0
0.576684	0.0760463	1	0	0.68469	0	0	0
0.600271	0	1	0	0.726106	0.075598	0	0
0	0	1	0	0.682715	0	0	0
0.618653	0	1	0	0.713947	0	0	0
0.576684	0.0831165	1	0	0.70805	0	0	0
0	0	1	0	0.682715	0	0	0
0.600271	0.0661894	1	0	0.738652	0.0852362	0	0
0.591391	0.0803877	1	0	0.738652	0.0901449	0	0
0	0	1	0	0	0	0	0
0	0	1	0	0.682715	0	0	0
0	0	1	0	0.682715	0	0	0
0.568215	0.0783886	1	0	0.68469	0	0	0
0	0	1	0	0	0	0	0
0	0	1	0	0	0	0	0
0	0	1	0	0	0	0	0
0	0	1	0	0	0	0	0
0.591391	0.0803877	1	0	0.726106	0.0926223	0	0
0	0	1	0	0.682715	0	0	0
0.383223	0	1	0	0	0	0	0
0.374043	0	1	0	0	0	0	0
0.576684	0.0760463	1	0	0.68469	0	0	0
0.383223	0	1	0	0	0	0	0
0	0	1	0	0	0	0	0
0.576684	0.0760463	1	0	0.68469	0	0	0
0.600271	0	1	0	0.702151	0	0	0
0.585343	0	1	0	0.70805	0.0691034	0	0
0.600271	0	1	0	0.713947	0	0	0
0.600271	0	1	0	0.713947	0	0	0
0.585343	0	1	0	0.696193	0	0	0
0.600271	0	1	0	0.726106	0	0	0
0.383223	0	1	0	0	0	0	0
0.568215	0.0737181	1	0	0.696193	0	0	0
0	0	1	0	0	0	0	0
0.576684	0.0879032	1	0	0.696193	0.0831165	0	0
0.585343	0.0737181	1	0	0.70805	0	0	0
0	0	1	0	0	0	0	0
0	0	1	0	0	0	0	0
0.600271	0	1	0	0.738652	0.0828045	0	0
0	0	1	0	0	0	0	0
0.585343	0.0714038	1	0	0.696193	0	0	0
0.585343	0.0691034	1	0	0.720283	0	0	0
0	0	1	0	0	0	0	0
0.591391	0.0803877	1	0	0.738652	0.0901449	0	0
0	0	1	0	0.672537	0	0	0
0.374043	0	1	0	0	0	0	0
0.568215	0.0783886	1	0	0.70805	0	0	0
0	0	1	0	0	0	0	0
0.591391	0.0803877	1	0	0.726106	0.0803877	0	0
0.568215	0.0879032	1	0	0.70805	0.09275	0	0
0	0	1	0	0	0	0	0
0	0	1	0	0	0	0	0
0.576684	0	1	0	0.696193	0.0668166	0	0
0	0	1	0	0	0	0	0
0.594202	0	1	0	0.696193	0	0	0
0.374043	0	1	0	0	0	0	0
0.585343	0.0645434	1	0	0.720283	0	0	0
0.576684	0.0783886	1	0	0.68469	0	0	0
0.576684	0.0807453	1	0	0.68469	0	0	0
0.383223	0	1	0	0	0	0	0
0	0	1	0	0	0	0	0
0.585343	0	1	0	0.70805	0.0668166	0	0
0	0	1	0	0	0	0	0
0.369009	0	1	0	0	0	0	0
0	0	1	0	0.682715	0	0	0
0.374043	0	1	0	0	0	0	0
0.568215	0.0737181	1	0	0.696193	0	0	0
0	0	1	0	0.672537	0	0	0
0.585343	0	1	0	0.70805	0	0	0
0	0	1	0	0.672537	0	0	0
0.609355	0	1	0	0.726106	0.0732248	0	0
0.585343	0	1	0	0.696193	0.0760463	0	0
0.576684	0.0783886	1	0	0.696193	0.0879032	0	0
0.600271	0.0661894	1	0	0.738652	0.0708657	0	0
0.568215	0.0807453	1	0	0.68469	0	0	0
0	0	1	0	0	0	0	0
0.576684	0.0783886	1	0	0.68469	0	0	0
0	0	1	0	0	0	0	0
0	0	1	0	0.682715	0	0	0
0.585343	0	1	0	0.720283	0.0691034	0	0
0.576684	0.0831165	1	0	0.68469	0.090319	0	0
0	0	1	0	0	0	0	0
0.576684	0.0807453	1	0	0.720283	0	0	0
0	0	1	0	0	0	0	0
0.374043	0	1	0	0	0	0	0
0	0	1	0	0	0	0	0
0.600271	0	1	0	0.726106	0.0828045	0	0
0.576684	0	1	0	0.696193	0.0760463	0	0
0	0	1	0	0	0	0	0
0.576684	0	1	0	0.696193	0	0	0
0.576684	0	1	0	0.696193	0.0783886	0	0
0.374043	0	1	0	0	0	0	0
0.568215	0.0831165	1	0	0.696193	0.090319	0	0
0.585343	0	1	0	0.696193	0.0714038	0	0
0	0	1	0	0.682715	0	0	0
0.576684	0.0760463	1	0	0.68469	0	0	0
0.383223	0	1	0	0	0	0	0
0.576684	0.0831165	1	0	0.696193	0.0807453	0	0
0.568215	0.0855024	1	0	0.68469	0.0855024	0	0
0.591391	0.0803877	1	0	0.713947	0.0901449	0	0
0.603268	0	1	0	0.68469	0.0760463	0	0
0.594202	0	1	0	0.70805	0.0714038	0	0
0.568215	0.0760463	1	0	0.696193	0	0	0
0.585343	0	1	0	0.70805	0.0807453	0	0
0	0	1	0	0	0	0	0
0.576684	0.0807453	1	0	0.70805	0	0	0
0	0	1	0	0	0	0	0
0	0	1	0	0	0	0	0
0.369009	0	1	0	0	0	0	0
0.383223	0	1	0	0	0	0	0
0.576684	0.0831165	1	0	0.696193	0.090319	0	0
0.383223	0	1	0	0	0	0	0
0.369009	0	1	0	0	0	0	0
0.609355	0	1	0	0.726106	0	0	0
0.576684	0	1	0	0.696193	0	0	0
0	0	1	0	0	0	0	0
0	0	1	0	0	0	0	0
0.378066	0	1	0	0	0	0	0
0	0	1	0	0	0	0	0
0	0	1	0	0	0	0	0
0.374043	0	1	0	0	0	0	0
0.568215	0.0737181	1	0	0.70805	0	0	0
0	0	1	0	0	0	0	0
0.603268	0	1	0	0.696193	0.0645434	0	0
0	0	1	0	0	0	0	0
0.576684	0.090319	1	0	0.68469	0.090319	0	0
0	0	1	0	0.672537	0	0	0
0	0	1	0	0	0	0	0
0	0	1	0	0	0	0	0
0	0	1	0	0.682715	0	0	0
0.568215	0.0807453	1	0	0.696193	0.090319	0	0
0	0	1	0	0	0	0	0
0.576684	0.0760463	1	0	0.70805	0.100137	0	0
0	0	1	0	0.682715	0	0	0
0	0	1	0	0.682715	0	0	0
0.585343	0	1	0	0.696193	0.0714038	0	0
0.585343	0.0714038	1	0	0.70805	0	0	0
0.576684	0.0807453	1	0	0.67352	0	0	0
0.600271	0.0803877	1	0	0.713947	0.0852362	0	0
0.618653	0	1	0	0.726106	0	0	0
0.585343	0	1	0	0.720283	0	0	0
0.585343	0	1	0	0.70805	0.0645434	0	0
0.568215	0.0737181	1	0	0.696193	0	0	0
0	0	1	0	0	0	0	0
0.603268	0	1	0	0.68469	0.0714038	0	0
0.585343	0.0737181	1	0	0.70805	0	0	0
0.585343	0	1	0	0.70805	0.0691034	0	0
0.576684	0.0714038	1	0	0.68469	0	0	0
0.568215	0.0760463	1	0	0.68469	0	0	0
0.576684	0	1	0	0.696193	0.0714038	0	0
0.600271	0.0828045	1	0	0.713947	0.0803877	0	0
0.568215	0.0783886	1	0	0.70805	0	0	0
0	0	1	0	0.682715	0	0	0
0	0	1	0	0.672537	0	0	0
0	0	1	0	0	0	0	0
0.576684	0.0807453	1	0	0.68469	0	0	0
0	0	1	0	0	0	0	0
0	0	1	0	0	0	0	0
0.591391	0.0852362	1	0	0.726106	0.0803877	0	0
0.609355	0.0661894	1	0	0.738652	0	0	0
0	0	1	0	0	0	0	0
0	0	1	0	0	0	0	0
0	0	1	0	0	0	0	0
0.594202	0	1	0	0.720283	0	0	0
0	0	1	0	0	0	0	0
0.576684	0.0760463	1	0	0.70805	0	0	0
0.609355	0	1	0	0.679565	0	0	0
0	0	1	0	0	0	0	0
0.585343	0	1	0	0.68469	0	0	0
0	0	1	0	0	0	0	0
0.576684	0.0879032	1	0	0.696193	0.0807453	0	0
0.576684	0.0737181	1	0	0.696193	0	0	0
0.585343	0	1	0	0.70805	0.0737181	0	0
0.591391	0.0779856	1	0	0.738652	0.0926223	0	0
0.576684	0	1	0	0.696193	0.0691034	0	0
0.600271	0	1	0	0.726106	0	0	0
0.600271	0	1	0	0.713947	0	0	0
0.585343	0	1	0	0.68469	0	0	0
0.383223	0	1	0	0	0	0	0
0.568215	0.0807453	1	0	0.696193	0	0	0
0	0	1	0	0	0	0	0
0	0	1	0	0.682715	0	0	0
0.374043	0	1	0	0	0	0	0
0	0	1	0	0	0	0	0
0.383223	0	1	0	0	0	0	0
0.576684	0.0783886	1	0	0.68469	0	0	0
0	0	1	0	0	0	0	0
0	0	1	0	0	0	0	0
0	0	1	0	0	0	0	0
0.600271	0	1	0	0.726106	0.075598	0	0
0	0	1	0	0	0	0	0
0.585343	0	1	0	0.70805	0.0691034	0	0
0.600271	0.0852362	1	0	0.713947	0.0852362	0	0
0	0	1	0	0	0	0	0
0.576684	0.0831165	1	0	0.696193	0.09275	0	0
0	0	1	0	0	0	0	0
0.568215	0.0691034	1	0	0.70805	0	0	0
0	0	1	0	0	0	0	0
0	0	1	0	0	0	0	0
0.369009	0	1	0	0	0	0	0
0.576684	0.0831165	1	0	0.696193	0.0855024	0	0
0	0	1	0	0	0	0	0
0.585343	0	1	0	0.696193	0.0760463	0	0
0	0	1	0	0.682715	0	0	0
0.568215	0.0807453	1	0	0.696193	0.09275	0	0
0.585343	0	1	0	0.70805	0.0668166	0	0
0.576684	0.0807453	1	0	0.70805	0.0951965	0	0
0.576684	0.0855024	1	0	0.696193	0.09275	0	0
0.594202	0.0645434	1	0	0.720283	0	0	0
0.600271	0	1	0	0.702151	0	0	0
0.600271	0.0828045	1	0	0.713947	0.0852362	0	0
0	0	1	0	0.682715	0	0	0
0	0	1	0	0	0	0	0
0.609355	0	1	0	0.738652	0	0	0
0.576684	0.0783886	1	0	0.70805	0	0	0
0.568215	0.0737181	1	0	0.696193	0	0	0
0.369009	0	1	0	0	0	0	0
0.600271	0	1	0	0.713947	0.0685206	0	0
0.594202	0	1	0	0.70805	0.0737181	0	0
0.600271	0.0803877	1	0	0.713947	0.0876829	0	0
0	0	1	0	0.682715	0	0	0
0.585343	0	1	0	0.720283	0.0783886	0	0
0.369009	0	1	0	0	0	0	0
0.591391	0.0828045	1	0	0.726106	0.0779856	0	0
0	0	1	0	0.682715	0	0	0
0.576684	0	1	0	0.696193	0	0	0
0.576684	0.0807453	1	0	0.696193	0	0	0
0.568215	0	1	0	0.70805	0.0760463	0	0
0	0	1	0	0	0	0	0
0	0	1	0	0	0	0	0
0.585343	0.0691034	1	0	0.70805	0.0714038	0	0
0	0	1	0	0	0	0	0
0.374043	0	1	0	0	0	0	0
0.600271	0	1	0	0.726106	0	0	0
0	0	1	0	0	0	0	0
0	0	1	0	0	0	0	0
0	0	1	0	0	0	0	0
0.576684	0.0831165	1	0	0.68469	0	0	0
0	0	1	0	0.672537	0	0	0
0	0	1	0	0	0	0	0
0.585343	0	1	0	0.696193	0	0	0
0	0	1	0	0.682715	0	0	0
0	0	1	0	0.672537	0	0	0
0	0	1	0	0	0	0	0
0.591391	0.0779856	1	0	0.726106	0.0901449	0	0
0	0	1	0	0.682715	0	0	0
0.576684	0	1	0	0.696193	0	0	0
0	0	1	0	0.682715	0	0	0
0.568215	0.0831165	1	0	0.68469	0	0	0
0	0	1	0	0	0	0	0
0.609355	0.0661894	1	0	0.738652	0	0	0
0.576684	0.0783886	1	0	0.70805	0	0	0
0.568215	0.0760463	1	0	0.696193	0	0	0
0.585343	0.0783886	1	0	0.696193	0	0	0
0.576684	0	1	0	0.696193	0	0	0
0	0	1	0	0.672537	0	0	0
0.600271	0	1	0	0.713947	0	0	0
0.609355	0.0685206	1	0	0.726106	0	0	0
0.374043	0	1	0	0	0	0	0
0.568215	0.090319	1	0	0.70805	0.0855024	0	0
0.576684	0.0714038	1	0	0.70805	0	0	0
0.568215	0.0855024	1	0	0.696193	0.090319	0	0
0.609355	0.0732248	1	0	0.713947	0	0	0
0.378066	0	1	0	0	0	0	0
0	0	1	0	0.672537	0	0	0
0.576684	0.0783886	1	0	0.696193	0	0	0
0	0	1	0	0	0	0	0
0	0	1	0	0	0	0	0
0	0	1	0	0.672537	0	0	0
0.609355	0	1	0	0.726106	0.0803877	0	0
0.576684	0.0879032	1	0	0.696193	0.0951965	0	0
0	0	1	0	0	0	0	0
0.576684	0.0737181	1	0	0.68469	0	0	0
0.594202	0.0714038	1	0	0.70805	0	0	0
0	0	1	0	0	0	0	0
0	0	1	0	0.682715	0	0	0
0.585343	0.0760463	1	0	0.720283	0	0	0
0.369009	0	1	0	0	0	0	0
0	0	1	0	0	0	0	0
0.609355	0.0661894	1	0	0.726106	0.0685206	0	0
0	0	1	0	0.682715	0	0	0
0.576684	0.0807453	1	0	0.696193	0	0	0
0	0	1	0	0	0	0	0
0.383223	0	1	0	0	0	0	0
0.374043	0	1	0	0	0	0	0
0	0	1	0	0.682715	0	0	0
0.374043	0	1	0	0	0	0	0
0.568215	0.0783886	1	0	0.696193	0	0	0
0	0	1	0	0.672537	0	0	0
0	0	1	0	0	0	0	0
0.576684	0.0855024	1	0	0.696193	0.09275	0	0
0.383223	0	1	0	0	0	0	0
0.591391	0.0852362	1	0	0.726106	0.0901449	0	0
0	0	1	0	0.682715	0	0	0
0.585343	0	1	0	0.696193	0.0714038	0	0
0.585343	0	1	0	0.720283	0.0737181	0	0
0.576684	0.0807453	1	0	0.68469	0.0879032	0	0
0.576684	0.0760463	1	0	0.70805	0.0951965	0	0
0.609355	0	1	0	0.690697	0	0	0
0.600271	0	1	0	0.702151	0	0	0
0	0	1	0	0.682715	0	0	0
0.600271	0	1	0	0.713947	0	0	0
0	0	1	0	0	0	0	0
0	0	1	0	0.672537	0	0	0
0.374043	0	1	0	0	0	0	0
0.383223	0	1	0	0	0	0	0
0	0	1	0	0	0	0	0
0	0	1	0	0	0	0	0
0.576684	0.0783886	1	0	0.696193	0	0	0
0.576684	0.0855024	1	0	0.68469	0.090319	0	0
0	0	1	0	0.672537	0	0	0
0	0	1	0	0.672537	0	0	0
0	0	1	0	0	0	0	0
0.576684	0	1	0	0.696193	0.0737181	0	0
0.609355	0	1	0	0.713947	0	0	0
0	0	1	0	0.672537	0	0	0
0.576684	0.0855024	1	0	0.696193	0.0807453	0	0
0.378066	0	1	0	0	0	0	0
0.609355	0	1	0	0.713947	0	0	0
0	0	1	0	0	0	0	0
0.383223	0	1	0	0	0	0	0
0	0	1	0	0.672537	0	0	0
0.576684	0	1	0	0.696193	0.0668166	0	0
0.576684	0.0760463	1	0	0.68469	0	0	0
0.585343	0	1	0	0.696193	0.0691034	0	0
0	0	1	0	0.682715	0	0	0
0	0	1	0	0	0	0	0
0.568215	0.0760463	1	0	0.696193	0	0	0
0	0	1	0	0	0	0	0
0	0	1	0	0	0	0	0
0.374043	0	1	0	0	0	0	0
0	0	1	0	0	0	0	0
0	0	1	0	0	0	0	0
0.600271	0	1	0	0.726106	0.0803877	0	0
0	0	1	0	0	0	0	0
0.576684	0.0783886	1	0	0.696193	0.0879032	0	0
0	0	1	0	0	0	0	0
0	0	1	0	0	0	0	0
0.576684	0.0691034	1	0	0.70805	0	0	0
0.576684	0.0831165	1	0	0.696193	0.0879032	0	0
0	0	1	0	0	0	0	0
0.600271	0	1	0	0.702151	0	0	0
0	0	1	0	0.682715	0	0	0
0.576684	0	1	0	0.70805	0.0737181	0	0
0.609355	0	1	0	0.726106	0.0779856	0	0
0	0	1	0	0.672537	0	0	0
0	0	1	0	0	0	0	0
0.378066	0	1	0	0	0	0	0
0	0	1	0	0.682715	0	0	0
0.568215	0.0783886	1	0	0.70805	0	0	0
0.576684	0.0879032	1	0	0.696193	0.0976586	0	0
0.591391	0.0876829	1	0	0.702151	0.0876829	0	0
0.576684	0.0783886	1	0	0.68469	0	0	0
0	0	1	0	0	0	0	0
0.568215	0.0831165	1	0	0.696193	0.0855024	0	0
0	0	1	0	0	0	0	0
0.594202	0.0737181	1	0	0.720283	0	0	0
0.603268	0	1	0	0.68469	0.0760463	0	0
0	0	1	0	0	0	0	0
0.374043	0	1	0	0	0	0	0
0	0	1	0	0	0	0	0
0.600271	0	1	0	0.726106	0.0708657	0	0
0.576684	0.0807453	1	0	0.68469	0.0855024	0	0
0.576684	0.0737181	1	0	0.70805	0	0	0
0.576684	0.0760463	1	0	0.70805	0	0	0
0	0	1	0	0	0	0	0
0.600271	0	1	0	0.738652	0.0803877	0	0
0.378066	0	1	0	0	0	0	0
0.568215	0.0760463	1	0	0.70805	0	0	0
0.576684	0.0807453	1	0	0.696193	0.090319	0	0
0.600271	0	1	0	0.726106	0.0828045	0	0
0	0	1	0	0.682715	0	0	0
0	0	1	0	0	0	0	0
0.576684	0.0783886	1	0	0.696193	0	0	0
0.383223	0	1	0	0	0	0	0
0.576684	0	1	0	0.70805	0.0807453	0	0
0.374043	0	1	0	0	0	0	0
0.576684	0	1	0	0.70805	0.0737181	0	0
0.585343	0	1	0	0.720283	0.0737181	0	0
0.609355	0	1	0	0.713947	0	0	0
0.576684	0.0760463	1	0	0.68469	0	0	0
0	0	1	0	0	0	0	0
0	0	1	0	0	0	0	0
0	0	1	0	0.682715	0	0	0
[truncated: 1 more rows]
